# Supplementary material for: Clinical characteristics and prognosis differences between isolated right and left ventricular myocardial infarction in the Chinese population: a retrospective study
Source: PeerJ. 2023 Feb 28;11:e14959. doi: 10.7717/peerj.14959 (PMC9983429; doi:10.7717/peerj.14959)
Supplement: Supplemental Information 7 [file peerj-11-14959-s007.xlsx]

## Sheet: Sheet1
length.of.stay	stemi	gender	Age	BMI	Smoke	hb	ACEI/ARB	CCB	β-blocker	HR	SBP1	DBP1	WBC	PLT	cTnI	FBG	ALT	LDL	Cr	Revascularization	Statins	aspirin	clopidogrel	ticagrelor	Killip	Diabetes	Hypertension	Stroke	shock	angina	chronicheartfailure	COPD	Cardiac.Arrest	Mitral.Regurgitation	Aortic.Regurgitation	Tricuspid.Regurgitation	Pulmonic.Regurgitation	Left.Ventricular.Compliance.Decreased	EF	LA	RA	LV	RV	multivessel	chestpain	cheststuffiness	shortnessofbreath	syncope	bradycardia
11	1	0	62	22.43	0	155	1	0	1	82	136	76	17.43	204	12.074	9.57	11	3	69	0	1	1	1	0	2	1	1	0	0	0	0	1	0	1	0	0	0	0	54	33	30	49	29	0	1	0	0	0	0
16	1	1	72	23.39	0	117	1	1	1	82	134	78	9.1	154	5.19	6.44	45	2.82	97	1	1	1	1	0	1	1	0	0	0	0	0	0	0	0	3	0	0	1	41	40	32	56	29	1	1	0	0	0	0
11	1	1	56	20.96	1	129	0	0	0	58	76	64	11.76	221	0.084	5.75	13	3.37	78	0	1	1	1	0	1	0	1	0	0	0	0	0	0	1	0	1	0	0	61	30	27	43	27	0	0	1	0	0	1
8	1	1	74	25.65	1	148	1	0	1	57	117	70	8.39	240	10.865	6.86	31	2.09	103	0	1	1	1	0	2	0	0	1	0	0	0	0	0	1	0	0	0	1	57	34	34	55	34	0	1	0	0	0	1
22	1	1	45	30.37	1	161	1	0	0	70	114	70	8.97	243	16	7.41	59	4.8	92	1	1	1	0	1	1	0	0	0	0	0	0	0	0	0	0	0	0	0	47	29	26	42	26	0	1	0	0	0	0
10	0	0	69	23.92	0	130	1	1	0	63	143	78	8.38	135	2.259	7.23	25	2.91	59	1	1	1	1	0	2	0	1	0	0	0	0	0	0	2	1	0	0	1	56	30	28	45	27	0	1	0	0	0	0
11	0	0	65	25.89	0	125	1	0	1	75	145	83	4.63	172	7.24	9.33	26	2.44	46	0	1	1	1	1	1	1	1	1	0	1	0	0	0	1	1	1	0	1	61	28	30	41	29	0	1	0	0	0	0
17	0	1	75	29.05	1	155	1	0	1	85	143	78	7.1	102	2.302	5.92	46	3.63	77	0	1	1	1	0	1	1	1	0	0	0	0	0	0	0	2	0	0	0	67	34	34	46	29	1	1	0	0	0	0
10	0	1	70	26.21	1	156	1	0	1	72	160	108	6.73	84	0.001	6.48	29	1.99	58	1	1	1	1	0	1	0	1	0	0	0	0	1	0	0	1	0	1	1	78	31	30	54	26	0	1	0	0	0	0
7	0	0	75	25.86	0	99	1	0	1	57	142	72	6.61	196	0.673	11.87	20	1.52	87	1	1	1	1	0	1	1	0	0	0	0	0	0	0	0	0	1	0	0	57	26	28	41	32	0	1	0	0	0	1
8	0	1	72	22.68	1	117	1	0	1	72	136	68	9.82	142	2.74	7.52	14	0.89	87	0	1	1	1	0	1	1	1	0	0	0	0	0	0	1	0	0	1	1	61	35	31	50	32	1	0	1	1	0	0
11	0	1	71	26.57	0	166	1	0	1	121	142	98	9.59	231	6.137	8.93	21	1.94	128	0	1	1	1	0	1	1	1	0	0	0	1	0	0	1	0	0	0	0	41	44	38	61	39	1	0	1	1	0	0
9	0	1	80	18.18	1	118	0	1	1	78	122	68	6.5	277	7.458	4.81	17	2.25	88	0	0	1	1	0	1	1	1	0	0	1	0	1	0	0	0	1	0	1	73	32	27	46	30	1	1	0	0	0	0
6	0	1	63	25.17	1	140	1	1	1	71	122	88	7.83	278	3.06	4.99	31	2.33	72	1	1	1	1	0	1	0	1	0	0	0	0	0	0	1	1	1	0	0	50	33	32	50	34	0	1	0	0	0	0
5	0	1	77	28.89	1	122	0	0	0	54	126	70	6.61	193	0.036	4.99	20	1.87	99	0	1	1	0	1	1	1	1	0	0	0	0	0	0	1	0	0	0	1	62	39	35	50	32	1	1	0	0	0	1
7	0	1	71	26.45	1	136	1	0	0	57	131	69	5.42	298	0.301	6.7	21	2.52	138	1	1	1	0	1	2	0	1	0	0	1	0	1	0	1	0	0	0	0	54	33	30	49	29	0	1	0	0	0	1
3	1	0	79	23.94	0	98	1	0	0	87	192	87	10.64	187	0.9	6.7	25	1.92	217	0	1	1	1	0	4	0	1	0	0	0	0	0	0	1	0	0	0	0	54	33	30	49	29	0	0	0	1	0	0
11	1	0	65	20.45	0	134	1	0	1	97	120	84	13.75	219	16	5.98	70	3.11	64	1	1	1	1	0	1	1	0	0	0	0	0	0	0	1	0	1	0	0	40	29	26	54	24	0	1	1	0	0	0
6	1	1	49	19.53	0	126	0	0	0	57	110	78	13.73	186	16	12.95	32	1.93	65	0	1	1	1	0	1	1	0	0	0	0	0	0	0	0	0	0	1	1	71	28	28	41	22	0	1	0	0	0	1
14	0	1	71	22.67	1	101	1	0	1	81	128	65	5.78	153	1.493	3.93	12	2.71	89	1	1	1	1	0	1	0	1	0	0	1	0	0	0	1	1	0	0	0	32	35	25	48	21	0	1	1	0	0	0
3	0	1	84	27.31	1	90	0	0	0	98	110	62	7.64	104	13.962	6.61	39	1.32	117	0	1	1	1	0	2	0	0	0	0	0	0	0	0	1	0	0	0	0	54	33	30	49	29	0	1	0	0	0	0
20	0	0	70	24.54	0	93	1	1	1	70	160	80	9.77	282	4.088	12.5	7	2.42	177	0	1	1	1	0	2	1	1	1	1	0	0	0	0	1	0	0	0	0	54	33	30	49	29	0	0	0	0	0	0
17	1	1	75	27.53	1	125	1	0	1	70	120	80	9.19	175	6.245	6.14	55	2.04	102	1	1	1	1	0	1	0	0	0	0	1	1	0	0	1	0	0	0	0	54	33	30	49	29	0	0	1	1	0	0
4	0	1	57	22.55	1	129	1	0	1	107	120	89	6.34	308	5.765	11.21	20	3.19	111	0	1	1	0	1	3	1	0	0	0	0	0	0	1	1	0	1	1	0	31	40	27	60	25	1	1	0	1	0	0
7	0	1	50	26.81	1	151	1	0	1	60	100	60	14.65	268	9.723	6.95	39	1.29	120	0	1	1	1	0	2	1	1	0	0	0	0	0	0	1	0	0	0	1	68	28	27	43	26	0	1	0	0	0	0
7	0	1	52	25.95	1	152	1	0	1	70	110	70	6.67	163	0.443	5.18	26	2.27	70	1	1	1	1	0	1	0	0	0	0	0	0	0	0	0	0	0	1	0	60	31	33	50	33	0	1	0	0	0	0
6	1	0	77	25.48	0	98	1	0	1	56	110	56	12.81	198	0.05	7.39	32	1.67	58	1	1	1	1	0	1	0	1	0	0	1	0	0	0	1	0	0	0	0	54	33	30	49	29	0	1	0	0	0	1
21	1	1	65	28.69	1	157	1	1	0	55	164	94	8.59	221	0.189	5.18	25	3.14	134	0	1	1	1	0	2	0	1	1	0	0	0	0	0	0	1	0	0	1	62	34	29	48	29	0	0	0	0	0	1
26	1	0	80	17.67	0	98	1	1	1	94	172	98	6.22	196	16	7.1	49	1.75	94	0	1	1	1	0	2	0	1	0	0	0	0	0	0	1	0	0	0	0	54	33	30	49	29	0	1	0	0	0	0
6	1	1	42	20.21	1	154	0	0	1	96	142	90	20.93	342	11.652	8.46	73	6.26	76	1	1	1	0	1	1	0	0	0	0	0	0	0	0	0	0	0	1	0	63	34	34	47	31	0	0	0	0	0	0
10	0	1	69	21.26	1	131	1	0	1	62	120	80	5.65	84	0.87	5.05	20	2.03	88	1	1	1	1	0	1	0	0	0	0	0	0	1	0	0	0	1	1	1	66	33	31	46	28	0	0	1	0	0	0
11	0	1	69	25.71	1	127	1	0	1	66	149	69	6.13	155	0.06	4.96	19	2.5	105	0	1	1	1	0	2	0	1	0	0	0	0	0	0	0	0	0	0	1	48	42	27	42	26	0	1	0	1	0	0
8	1	1	40	23.92	1	151	1	0	1	50	119	89	11.55	208	16	10.79	119	1.53	53	0	1	1	1	0	4	1	0	0	1	0	0	0	0	0	0	0	0	1	66	30	28	47	28	0	1	1	0	0	1
8	1	1	74	20.55	1	117	1	1	1	120	158	96	5.6	114	0.18	3.5	30	2.82	100	1	1	1	1	0	2	1	1	0	0	1	1	0	0	0	0	1	0	1	33	47	38	61	35	1	1	0	0	0	0
7	0	1	89	26.81	0	103	1	0	1	100	160	100	7.85	146	1.629	4.75	45	2.26	136	0	1	1	1	0	2	0	0	0	0	0	0	0	0	1	1	1	0	0	43	35	25	57	26	0	0	1	1	0	0
13	0	0	73	17.26	0	97	1	0	1	101	109	50	18.55	219	6.49	7.5	31	1.2	148	0	0	1	1	0	1	1	1	0	0	0	0	0	0	1	0	0	0	0	54	33	30	49	29	0	0	0	0	0	0
16	1	0	74	25.71	0	74	1	0	1	90	180	90	10.37	217	1.519	6.7	29	1.38	112	1	1	1	0	1	3	1	1	0	0	0	0	0	0	0	0	0	0	0	48	42	26	54	28	0	1	0	0	0	0
22	0	0	71	25.72	0	99	1	1	0	55	170	70	13.6	212	0.213	11.99	20	2.93	167	0	1	1	1	0	1	1	1	1	0	1	0	0	0	2	0	0	0	0	48	39	31	56	26	0	1	1	0	0	1
11	0	0	76	23.11	0	127	0	1	1	98	154	90	8.95	351	16	9.3	12	3.83	99	0	1	1	1	0	2	1	1	0	0	0	0	0	0	1	0	0	0	0	54	33	30	49	29	0	0	0	0	0	0
9	0	1	60	23.95	0	122	1	0	1	74	130	80	15.47	194	3.405	6.7	24	1.82	92	0	1	1	0	1	1	1	0	0	0	0	0	0	0	1	0	1	0	0	71	26	30	44	31	0	0	1	0	0	0
8	1	1	87	25.91	1	100	1	1	1	76	146	96	5.37	243	0.001	7.38	15	2.15	138	0	1	1	1	0	1	0	1	0	0	0	0	1	0	1	1	1	1	0	51	39	34	52	34	0	0	1	1	0	0
8	0	1	67	27.28	0	159	1	0	1	76	159	89	7.08	241	0.461	5.5	20	3.28	100	0	1	1	1	0	1	1	1	1	0	1	0	0	0	1	0	0	0	0	54	33	30	49	29	0	1	0	0	0	0
3	1	1	78	23.94	0	123	0	0	0	75	132	82	15.5	182	4.95	8.11	89	1.83	187	0	1	1	1	1	4	0	1	1	0	0	0	0	0	1	0	0	0	0	54	33	30	49	29	0	0	0	1	0	0
24	1	0	67	19.92	0	130	0	1	1	90	104	61	13.17	86	1.017	20.77	16	2.56	246	0	1	1	1	0	1	1	0	1	0	0	0	0	0	1	0	0	0	0	54	33	30	49	29	0	0	0	0	0	0
10	1	1	68	19.38	1	113	1	0	1	68	132	80	6.86	390	0.001	6.32	18	1.83	77	0	1	1	0	1	1	0	1	0	0	1	1	0	0	0	0	0	0	0	72	27	31	38	25	0	1	0	0	0	0
6	0	1	85	20.02	1	117	0	0	1	64	85	60	9.48	212	13.249	4.79	14	1.88	139	0	1	1	0	1	1	1	0	1	0	0	0	0	0	1	1	0	0	1	66	27	25	45	24	0	1	0	0	0	0
12	1	1	67	23.31	1	148	0	0	0	38	68	48	10.55	174	0.539	5.2	71	2.23	62	1	1	1	0	1	4	0	0	0	1	1	0	0	0	1	0	0	0	0	54	33	30	49	29	0	1	1	0	0	1
7	0	0	69	20	0	117	1	0	1	86	104	66	10.64	113	0.876	3.57	46	2.33	101	1	1	0	1	0	1	0	1	0	0	1	1	1	0	2	0	0	0	0	26	37	26	65	23	0	1	0	1	0	0
8	0	0	85	21.88	0	114	1	0	1	72	136	72	10.85	178	1.416	6.35	17	2.13	66	0	1	1	0	1	2	0	0	0	0	0	0	0	0	1	0	1	0	0	55	34	32	52	29	0	1	0	0	0	0
8	0	0	87	18.03	0	80	1	1	1	71	188	90	3.65	123	7.854	4.83	17	1.58	155	0	1	0	0	1	1	0	1	0	0	0	0	0	0	1	0	0	0	0	54	33	30	49	29	0	1	0	0	0	0
9	1	1	62	21.85	1	133	1	0	1	56	146	75	11.56	210	0.99	9.75	21	2.66	61	1	1	1	1	1	1	1	1	0	0	1	0	0	0	0	0	0	0	1	65	29	32	45	31	0	1	0	0	0	1
15	0	1	58	34.45	0	156	1	0	1	88	144	94	7.26	166	0.83	5.72	34	2.26	70	0	1	1	0	1	1	0	1	0	0	1	1	0	0	0	0	0	0	0	69	37	28	44	28	0	1	0	0	0	0
9	0	1	74	25.43	1	143	1	1	0	72	120	60	10.46	178	0.961	4.5	28	1.64	91	1	1	1	1	0	1	0	1	0	0	0	1	1	0	1	0	0	0	0	54	33	30	49	29	0	1	0	0	0	0
9	0	1	81	19.03	1	133	1	0	1	71	136	78	8.84	155	1.407	5.35	35	1.23	109	0	1	1	1	0	1	0	1	0	0	0	0	0	0	2	1	1	0	0	54	36	30	45	30	0	1	0	0	0	0
11	1	0	72	23.94	0	100	0	0	1	116	86	52	9.44	192	8.092	6.15	107	1.41	118	0	1	1	1	0	1	1	1	0	0	0	1	0	0	1	0	0	0	0	54	33	30	49	29	0	0	0	0	0	0
14	1	1	64	22.59	1	151	1	0	1	75	100	60	18.94	239	2.446	7.82	43	3.19	75	1	1	1	1	0	1	1	0	0	0	0	0	1	0	2	0	0	0	1	57	35	31	54	33	1	1	0	0	0	0
17	0	1	69	23.53	0	147	0	0	1	75	131	78	10.06	205	0.642	6.97	25	3.97	75	0	1	1	1	0	1	0	0	0	0	0	0	0	0	1	0	0	0	0	54	33	30	49	29	1	1	0	0	0	0
4	0	0	78	20.2	0	121	0	0	0	100	114	78	13.13	286	11.587	6.84	125	2.48	116	0	1	1	1	0	3	1	1	1	0	0	0	0	0	3	0	1	1	0	44	40	29	52	26	0	0	1	1	0	0
10	0	1	75	24.98	1	139	1	1	0	96	177	83	17.52	311	1.012	11.54	14	2.92	71	0	1	1	1	0	1	1	1	0	0	0	1	0	0	1	1	1	0	0	43	37	34	52	28	0	0	1	0	0	0
14	1	1	88	16.12	1	147	1	0	1	90	120	90	8.86	212	6.238	5.13	17	2.22	102	1	1	1	1	1	2	0	0	0	0	1	0	0	0	1	0	0	0	0	50	38	29	42	28	0	1	0	1	0	0
16	1	0	89	37.46	0	105	1	0	0	99	128	76	7.18	127	0.849	7.53	23	1.67	137	0	1	1	0	1	3	0	1	0	0	0	0	0	0	2	1	1	0	0	23	33	35	56	34	0	1	0	0	0	0
13	0	1	62	25.78	0	130	1	0	1	56	146	82	9.48	212	4.79	5.32	38	2.51	82	1	1	1	1	0	1	0	1	1	0	0	0	0	0	0	1	0	0	1	67	29	32	48	28	0	1	0	0	0	1
10	0	1	78	28.58	1	122	1	1	1	136	170	114	3.92	102	4.315	5.26	204	1.1	110	0	1	1	1	0	2	1	1	1	0	1	1	0	0	2	1	3	1	0	51	40	40	48	34	0	0	1	1	0	0
10	0	1	53	24.22	1	136	1	0	1	140	189	110	22.4	179	0.913	6.69	26	2.67	103	0	1	1	1	1	3	1	1	0	0	0	0	0	0	1	0	0	0	0	45	36	33	52	31	0	1	0	1	0	0
26	1	0	76	20.03	0	108	0	0	1	88	140	81	9.77	176	5.46	14.41	26	2.3	69	1	1	1	1	0	1	1	1	0	0	0	1	0	0	0	0	0	0	1	56	33	31	46	31	0	1	0	0	0	0
18	0	0	69	25.39	0	117	1	0	0	66	157	70	8.17	284	10.466	10.69	33	1.86	43	0	1	1	1	0	1	1	1	0	0	1	1	1	0	2	0	0	0	0	37	39	31	63	32	0	0	1	1	0	0
12	0	1	78	24.63	1	133	1	0	1	65	124	70	8.18	220	7.074	6.54	55	3.03	118	1	1	1	0	1	2	0	1	1	0	0	0	0	0	1	1	0	0	0	69	33	25	44	26	0	1	0	0	0	0
6	1	1	60	26.22	1	156	1	0	1	68	136	78	5.87	228	9.241	6.22	55	3.81	76	0	1	1	1	0	1	1	1	1	0	0	0	0	0	0	0	0	0	1	59	38	28	54	27	0	1	0	0	0	0
9	1	0	77	18.41	0	118	0	0	1	89	128	76	13.05	123	11.868	5.66	86	2.23	50	0	1	1	1	0	2	0	1	0	0	0	0	0	0	1	1	1	0	0	35	33	33	44	23	0	1	0	0	0	0
11	0	1	65	21.3	1	122	1	0	1	75	119	82	8.51	145	16	6.23	31	2.33	79	1	1	1	1	0	1	0	1	0	0	1	0	0	0	0	0	1	0	1	59	36	33	57	27	0	1	0	0	0	0
10	0	1	69	27.89	1	144	1	0	0	72	140	90	7.3	195	0.001	4.65	48	1.9	80	1	1	1	1	0	2	0	1	0	0	0	0	0	0	1	0	1	0	1	65	28	28	44	31	0	1	1	0	0	0
17	1	1	85	17.1	1	124	0	0	0	70	98	53	9.03	217	1.975	6.22	25	1.94	72	1	1	1	1	1	2	0	0	0	0	0	1	1	0	0	1	1	1	0	37	28	34	41	31	0	0	0	0	0	0
21	0	1	86	21.56	0	97	0	0	1	65	118	57	7.75	244	4.621	3.69	50	2.2	105	0	1	1	1	0	4	0	1	0	0	0	0	0	0	3	1	2	1	0	42	35	34	42	27	0	1	0	0	0	0
2	1	1	61	28.93	1	163	0	0	0	84	128	100	23.06	245	10.209	9.56	95	3.86	94	0	0	0	0	0	4	0	1	1	0	0	0	0	0	0	0	0	0	0	51	34	29	52	30	0	0	0	1	0	0
9	0	1	63	25.64	0	139	1	0	0	66	150	78	3.61	107	1.618	8.37	25	2.11	82	1	1	1	0	1	1	1	1	0	0	0	0	0	0	1	1	1	1	1	68	33	28	52	27	1	1	0	0	0	0
7	1	1	69	22.86	0	120	1	0	1	92	92	50	7.23	156	16	8.45	63	2.65	99	1	1	1	1	0	1	0	0	0	0	0	0	0	0	1	2	0	0	1	61	36	29	50	26	0	1	0	0	0	0
16	0	1	80	24.49	1	122	1	0	1	85	130	86	6.3	132	3.186	3.11	13	2.2	112	0	1	1	1	0	2	1	1	0	0	0	1	0	0	1	3	1	0	1	46	40	28	70	25	1	1	1	1	0	0
7	1	1	69	26.04	1	139	1	0	1	102	147	87	7.62	149	8.009	9.68	49	3.4	80	0	1	1	1	0	1	1	1	0	0	0	1	1	0	1	0	0	0	0	54	33	30	49	29	0	1	0	0	0	0
8	0	1	82	20.55	0	106	1	0	0	100	135	84	3.49	122	1.157	6.32	13	1.81	102	1	1	1	0	1	1	1	1	0	0	0	0	0	0	1	0	1	0	0	50	39	32	53	30	0	0	1	0	0	0
9	0	0	69	28.3	0	117	0	1	1	93	126	68	5.21	160	0.212	3.5	14	1.98	58	1	1	1	1	0	1	1	1	1	0	1	0	0	0	1	0	0	0	0	54	33	30	49	29	0	0	1	0	0	0
7	0	1	71	23.94	1	112	1	0	0	96	118	71	11.33	143	16	7.16	75	1.04	190	0	1	1	1	0	3	1	1	1	0	0	0	0	0	1	0	0	0	0	54	33	30	49	29	0	0	0	1	0	0
5	1	1	75	23.44	0	120	1	0	0	67	119	74	7.09	181	6.02	4.76	31	1.52	91	0	1	1	0	1	1	0	1	0	0	0	0	0	0	0	0	1	1	1	72	29	30	45	28	0	1	0	0	0	0
11	1	0	73	21.33	0	127	1	0	1	86	137	76	8.67	185	5.8	4.83	20	2.17	52	1	1	1	0	1	4	1	1	0	0	0	0	0	0	1	1	1	1	0	37	30	30	43	23	1	0	1	0	0	0
6	0	1	66	21.05	1	125	1	0	1	59	108	80	11.15	330	1.828	3.98	31	3.58	99	0	1	1	1	0	1	0	0	0	0	0	0	0	0	0	0	0	1	1	50	30	34	54	30	0	0	1	0	0	1
6	0	1	71	19.14	1	142	1	0	1	88	100	78	4.49	112	16	5.02	20	1.53	145	0	1	0	1	0	1	0	0	0	0	0	0	0	0	2	0	3	0	0	20	40	51	62	33	0	1	0	0	0	0
14	1	1	88	20.76	1	118	0	0	1	85	114	68	5	161	11	9.24	27	1.35	59	0	1	1	1	0	1	1	0	0	0	0	0	0	0	1	1	0	1	0	36	25	27	36	25	0	1	0	0	0	0
9	0	1	71	27.72	1	120	1	1	1	74	170	100	5.89	139	0.796	4.87	19	2.56	160	1	1	1	1	0	1	0	1	0	0	1	1	0	0	3	1	3	0	0	52	52	42	56	38	0	0	1	1	0	0
8	1	1	64	22.58	0	127	1	0	1	87	143	86	5.37	164	5.551	13.41	34	3.06	70	0	1	1	1	0	1	1	1	0	0	0	0	0	0	1	1	1	1	1	54	31	29	51	30	0	1	0	0	0	1
11	0	1	71	21.47	1	128	1	0	1	95	170	100	10.13	226	5.197	4.94	16	1.69	223	0	1	1	1	0	2	0	1	0	0	0	1	0	0	2	1	2	0	0	32	39	33	62	33	0	0	1	0	0	0
8	0	1	62	24.8	1	155	1	0	1	75	146	88	11.35	290	13.958	5.77	38	3.07	65	1	1	1	0	1	1	0	0	0	0	0	0	0	0	0	0	0	0	0	76	33	29	45	30	0	0	1	0	0	0
10	1	1	70	24.42	1	135	1	0	1	90	158	82	9.12	199	16	6.37	24	1.41	73	1	1	1	0	1	2	1	1	0	0	0	0	0	0	1	0	1	0	0	46	42	35	52	32	1	1	0	0	0	0
11	1	1	48	26.77	1	164	1	0	1	75	120	80	21.55	251	16	5.54	55	3.66	71	1	1	1	1	0	1	0	0	0	0	1	0	0	0	1	0	0	0	1	57	39	26	55	30	0	1	0	0	0	0
7	1	1	71	20.76	1	137	0	0	0	76	128	76	8.83	168	2.92	6.7	35	2.98	64	1	1	1	0	1	1	0	0	0	0	0	0	1	0	1	1	1	0	0	37	36	37	56	33	0	1	0	0	0	0
9	1	1	69	27.7	0	154	1	1	1	79	170	96	6.42	169	0.047	6.7	9	3.09	84	1	1	1	0	1	1	1	1	0	0	0	0	0	0	1	1	0	0	0	50	40	32	57	30	0	1	0	0	0	0
7	1	1	63	25.82	1	135	0	0	1	72	148	82	11.17	200	2.265	5.88	50	2.54	81	1	1	1	0	1	1	0	1	0	0	0	0	0	0	0	0	0	0	0	53	30	30	50	28	0	1	0	0	0	0
9	0	1	79	25.97	0	128	1	0	1	89	122	65	6.57	170	16	6.7	45	2.52	88	1	1	1	1	0	2	0	1	0	0	0	0	0	0	0	1	0	0	1	56	41	29	50	29	1	1	0	0	0	0
7	0	0	74	20.96	0	91	0	0	0	99	103	55	4.6	52	4.67	5.51	30	1.09	66	0	1	0	0	0	4	0	0	0	0	0	0	0	0	1	0	0	0	0	54	33	30	49	29	0	0	0	1	0	0
16	0	0	73	16.44	1	122	1	1	1	65	190	90	8.36	152	1.152	5.82	39	1.22	81	0	1	1	1	0	2	0	1	1	0	0	0	1	0	2	2	1	0	0	55	46	25	53	24	0	1	0	0	0	0
16	1	1	71	16.9	1	115	0	0	1	97	120	68	9.12	347	6.583	6.61	80	2.75	147	0	1	1	1	1	2	0	0	0	0	0	0	0	0	3	1	1	1	1	56	31	26	48	33	0	1	1	0	0	0
16	1	1	78	23.39	1	133	1	0	1	78	115	75	6.54	161	9.66	4.7	22	2.04	69	1	1	1	1	1	1	0	1	1	0	0	0	0	0	0	0	0	1	1	61	30	30	42	33	0	1	0	0	0	0
12	1	0	61	22.19	0	136	1	1	1	89	174	94	12.8	515	1.544	6.35	21	1.41	59	1	1	1	0	1	1	0	1	0	0	0	0	0	0	0	1	0	0	0	60	27	25	36	27	0	1	0	0	0	0
17	0	1	67	23.94	1	124	0	0	0	117	94	69	10.03	96	13.922	6.7	88	3.36	57	0	1	1	1	0	4	0	0	0	0	0	0	1	0	1	0	0	0	0	54	33	30	49	29	0	0	0	1	0	0
12	1	1	56	28.34	1	136	1	0	1	71	113	70	6.52	201	8.26	5.71	22	1.73	102	1	1	1	0	1	2	0	0	0	0	0	0	0	0	1	0	1	0	0	49	31	32	49	33	0	1	0	0	0	0
7	0	1	83	27.7	1	124	0	1	1	87	130	70	6.77	323	0.194	5.38	21	2.3	87	0	1	1	1	0	1	0	1	0	0	1	0	0	0	0	1	0	0	0	66	33	34	51	31	0	1	0	0	0	0
11	0	0	75	22.6	0	101	0	1	1	52	94	60	8.15	132	0.98	11.01	20	1.95	85	1	1	1	0	1	1	1	0	0	0	0	0	0	0	0	1	0	1	1	63	26	32	44	29	0	0	1	0	0	1
8	0	0	76	20.55	1	123	1	0	1	62	155	68	5.42	143	5.892	4.61	25	2.37	81	1	1	1	1	0	1	0	1	0	0	0	0	0	0	0	1	1	1	1	64	31	32	45	30	0	1	0	0	0	0
10	1	1	84	26.03	0	138	1	0	0	87	140	90	4.4	171	2.142	9.18	20	2.8	88	0	1	1	1	0	3	1	0	0	0	0	0	1	0	2	0	0	0	1	56	43	42	67	37	0	1	0	1	0	0
9	0	1	57	28.71	0	96	1	1	0	86	168	100	6.94	296	0.91	6.4	12	2.51	146	0	1	1	1	0	2	1	1	0	0	0	0	0	0	1	1	0	0	0	37	39	35	54	27	0	0	1	1	0	0
7	1	1	54	28.73	1	127	1	0	0	106	135	87	10.62	158	5.429	14.02	25	1.21	72	1	1	1	1	1	2	1	0	0	0	0	0	0	0	1	0	0	0	0	46	31	32	49	30	0	0	1	1	0	0
11	1	1	79	23.03	1	142	1	0	1	73	143	68	11.71	186	6.702	5.55	39	1.86	110	1	1	1	1	0	1	0	1	0	0	1	0	0	0	1	0	1	0	0	55	30	28	44	29	0	1	1	0	0	0
8	0	1	61	19.92	1	162	1	0	1	89	138	90	11.91	218	16	4.85	32	3.24	71	1	1	1	1	0	1	0	0	0	0	0	0	0	0	0	0	1	0	1	67	33	28	45	28	0	1	1	0	0	0
9	0	1	63	21.45	1	158	0	0	1	67	105	64	11.11	143	6.814	4.69	22	1.99	90	1	1	1	0	1	1	0	0	1	0	0	0	0	0	1	0	0	0	0	48	31	32	49	26	0	1	0	0	0	0
1	0	1	75	26.18	1	123	1	0	1	66	164	90	7.09	220	0.021	6.7	18	2.52	74	1	1	1	1	0	1	0	1	1	0	0	0	1	0	0	0	1	1	0	52	38	29	53	28	0	1	0	0	0	0
6	1	1	59	28.04	1	165	1	0	1	105	113	79	11.88	137	1.684	7.11	53	1.78	97	1	1	1	0	1	1	0	1	0	0	0	0	0	0	1	0	1	0	0	36	40	32	72	33	0	1	0	0	0	0
8	0	1	76	21.22	1	115	1	1	1	87	190	60	6.7	215	2.931	11.58	11	3.22	133	1	1	1	1	0	1	1	1	0	0	0	0	0	0	0	1	0	0	0	60	33	31	50	30	0	1	0	0	0	0
10	0	1	78	21.05	1	111	1	1	0	90	140	100	9.54	277	1.119	4.25	19	2.96	96	0	1	1	1	0	2	0	1	1	0	0	0	0	0	1	0	0	0	0	54	33	30	49	29	1	0	0	1	0	0
10	0	0	67	21.78	0	97	0	0	1	80	98	64	9.22	290	5.621	10.06	117	2.73	124	0	1	1	0	1	1	1	0	0	0	0	0	0	0	1	1	1	0	1	59	33	26	40	30	0	1	0	0	0	0
11	1	1	45	24.2215	0	150	1	1	1	71	126	86	6.59	220	1.9	5.08	41.6	6.29	84	1	1	0	0	0	1	0	0	0	0	0	0	0	0	1	0	1	0	1	50	31	33	41	20	0	0	1	0	0	0
13	0	0	76	25.97	0	99	1	0	1	74	128	73	7.24	251	9.13	5.34	29	2.71	86	0	1	1	0	1	2	0	1	0	0	0	1	0	0	1	1	0	1	0	45	49	29	56	28	0	1	0	0	0	0
23	1	1	75	17.58	1	118	1	0	1	101	138	98	6.25	80	3.474	10.39	32	1.5	60	0	1	1	1	0	2	1	1	0	0	0	0	0	0	1	1	0	1	0	39	41	33	58	28	0	0	0	0	0	0
8	1	1	62	29.07	1	143	1	0	1	53	132	78	5.03	140	1.335	4.67	39	1.37	70	1	1	1	1	0	2	0	1	0	0	0	0	0	0	0	1	0	0	0	32	45	36	70	36	0	1	0	0	0	1
11	1	0	68	23.09	0	128	1	0	1	68	138	82	5.04	159	0.051	4.62	17	2.35	88	0	1	1	0	1	1	0	1	0	0	0	0	0	0	0	1	0	0	0	66	26	27	44	25	0	1	0	0	0	0
22	0	1	71	26.17	0	78	0	0	1	94	140	61	11.34	205	5.427	6.7	35	1.97	67	0	1	1	1	1	4	0	1	1	0	0	0	0	0	0	1	1	1	0	58	22	24	45	25	0	0	0	0	0	0
8	0	0	55	24.64	0	115	1	1	1	75	130	80	8.19	220	3.957	6.7	17	1.95	50	0	1	1	1	0	1	0	1	0	0	0	0	1	0	1	0	1	0	0	71	30	27	40	27	0	1	0	0	0	0
11	0	0	66	22.04	0	129	1	0	1	63	108	56	7.12	135	3.635	6.18	35	1.77	87	1	1	1	1	0	3	1	1	0	0	1	0	0	0	1	0	0	0	0	52	31	28	43	26	0	1	0	0	0	0
8	1	0	58	20.43	1	132	0	0	0	70	134	74	8.61	261	13.981	3.79	46	2.75	88	0	1	1	1	0	1	0	0	0	0	0	0	0	0	1	0	2	0	0	61	32	28	42	27	0	1	0	0	0	0
10	1	1	63	21.1927	1	138	1	0	1	78	185	107	7.34	237	64	5.73	254.8	2.48	89	1	1	1	1	0	2	0	1	1	0	0	0	0	0	1	1	0	0	0	57	35	33	46	20	0	0	1	0	0	0
9	0	1	67	26.35	0	134	1	0	1	90	139	87	7.54	170	2.595	10.16	19	2.59	80	0	1	1	0	1	1	1	0	0	0	0	0	0	0	0	0	1	1	0	73	35	32	52	28	0	1	0	0	0	0
6	1	1	80	23.03	1	126	1	0	1	64	137	73	6.94	194	16	4.76	24	1.79	75	1	1	1	1	0	2	0	0	0	0	0	0	1	0	1	0	0	0	0	50	29	33	48	31	0	0	0	0	0	0
5	0	1	81	28.65	1	68	0	0	0	73	131	91	10.3	196	2.127	6.97	20	1.96	153	0	0	0	0	0	1	0	0	0	0	0	0	0	0	1	0	0	0	0	54	33	30	49	29	0	0	0	0	0	0
16	1	0	75	29.24	0	95	0	0	1	74	145	83	7.6	245	6.298	9.9	14	3.31	98	1	1	1	1	0	1	1	1	0	0	0	0	0	0	1	0	0	1	0	62	31	28	46	31	0	0	0	0	0	0
11	0	1	64	26.03	1	112	1	0	1	72	130	66	7.66	170	3.303	5.11	13	1.47	80	1	1	1	1	0	1	1	1	0	0	0	0	0	0	0	0	0	0	1	69	37	25	37	27	0	1	0	0	1	0
14	0	1	80	23.56	1	119	1	0	1	65	158	90	6.33	219	0.243	7.06	20	2.79	77	0	1	1	1	0	1	1	1	0	0	1	0	0	0	1	0	0	0	0	66	34	32	46	31	0	1	0	0	0	0
12	0	1	45	24.22	1	151	1	0	1	57	108	75	10.13	64	16	6.01	37	1.19	87	1	1	1	0	1	1	0	0	0	0	0	0	0	0	1	0	0	0	0	57	32	35	44	29	0	0	1	0	0	1
7	1	1	71	22.96	1	151	1	1	1	78	184	88	10.74	272	8.328	6.56	26	2.59	86	1	1	1	1	0	1	0	1	0	0	0	0	0	0	1	0	1	0	1	68	28	27	43	26	0	1	0	0	0	0
13	1	1	72	25.1834	1	147	1	0	1	60	112	70	12.2	108	0.868	6.86	30	2.75	110	1	1	1	1	0	2	1	1	0	0	0	0	1	0	1	1	0	0	0	33	32	35	58	19	0	1	0	1	0	0
9	1	1	79	19.96	1	122	1	0	1	72	136	78	6.9	217	3.813	3.89	15	2.4	72	1	1	1	1	0	1	0	1	0	0	0	0	1	0	1	0	0	0	0	54	33	30	49	29	0	1	0	0	0	0
6	0	1	46	25.82	1	148	1	0	1	80	189	122	14.89	254	13.144	9.42	90	3.15	109	1	1	1	0	1	1	1	1	1	0	0	0	0	0	1	0	1	1	0	51	38	25	61	25	0	1	0	0	0	0
19	1	0	77	16.56	0	99	1	1	1	122	144	92	11.92	380	10.181	8.1	16	3.29	76	0	1	1	0	1	2	1	1	0	0	0	0	0	0	1	1	0	0	0	49	31	26	45	26	0	0	1	1	0	0
13	1	1	77	23.1837	1	99	0	0	1	79	177	91	7.72	183	0.018	7.32	18.3	2.59	81.1	1	1	1	1	0	2	0	1	0	0	0	0	0	0	1	0	1	0	1	62	35	42	48	22	0	1	0	0	0	0
8	0	0	68	19.56	0	122	1	1	1	66	170	80	6.02	133	0.018	4.11	182	1.97	63	0	1	1	1	0	1	0	1	0	0	0	0	0	0	1	0	0	0	0	54	33	30	49	29	0	1	0	0	0	0
8	1	0	63	20.03	0	132	1	0	1	97	118	74	13.91	267	11.882	5.69	115	2.68	65	1	1	1	0	1	2	0	0	0	0	0	0	0	0	1	0	0	0	0	41	32	34	49	29	0	1	0	0	0	0
7	0	0	76	23.21	0	124	1	0	1	59	130	80	8.15	289	0.94	5.62	27	3.75	95	0	1	1	1	0	2	0	0	0	0	0	0	0	0	0	1	0	0	0	61	28	26	44	22	0	0	0	0	0	1
6	1	1	65	17.72	1	144	1	0	1	70	135	71	12.67	180	3.084	5.53	47	1.29	117	1	1	1	0	1	1	0	1	1	0	0	0	0	0	1	0	1	0	0	42	29	29	48	25	1	1	0	0	0	0
5	0	1	74	20.24	1	89	0	1	0	60	124	68	5.5	214	2.092	5.8	16	3.18	88	0	1	0	1	0	1	0	0	0	0	1	0	0	0	0	1	0	0	0	69	31	32	52	28	0	1	0	0	0	0
7	0	0	73	18.3655	0	106	1	0	0	48	130	77	19.04	157	7.86	10.61	64.6	2.77	108	1	1	1	1	0	2	0	1	0	1	0	0	0	0	1	1	1	0	1	40	35	35	50	19	0	1	1	1	0	1
6	1	1	64	23.94	0	115	0	0	0	61	147	87	8.25	201	3.602	6.47	47	2.82	113	0	1	1	1	0	4	0	1	1	0	0	0	0	0	1	0	0	0	0	54	33	30	49	29	0	0	0	0	0	1
13	1	0	72	25.48	0	127	1	0	0	118	84	66	14.96	225	16	13.13	101	2.82	79	1	1	1	0	1	4	1	0	1	1	0	0	0	0	1	0	0	0	0	54	33	30	49	29	0	0	1	0	0	0
15	1	1	82	24.974	1	117	0	0	0	65	173	103	11.3	154	0.031	4.78	23.7	1.92	172	1	1	1	1	0	2	0	1	0	0	0	0	0	0	1	1	1	0	1	62	35	35	43	19	0	1	0	0	0	0
6	0	1	80	24.44	0	121	1	0	1	102	150	90	7.58	131	9.654	8.94	130	2.05	87	0	1	1	1	0	2	1	1	1	0	0	0	0	0	1	0	0	0	0	54	33	30	49	29	0	0	0	1	0	0
17	1	1	87	22.4059	0	136	1	0	1	68	125	70	4.56	126	0.023	5.27	11.4	1.52	118	1	1	1	1	0	1	0	1	1	0	0	0	0	0	2	1	2	0	1	47	40	32	54	18	0	1	0	0	0	0
10	1	1	51	27.8876	1	154	1	0	0	80	134	76	15.9	323	0.513	6.29	26.1	3.45	98	1	1	1	1	0	1	0	1	0	0	0	0	0	0	0	1	0	0	0	51	35	38	48	20	0	1	0	0	0	0
9	0	1	73	23.88	0	162	0	0	0	110	119	99	7.89	211	5.446	5.48	75	2.24	122	1	1	1	1	0	4	0	0	0	0	1	0	0	0	1	0	1	0	0	36	44	30	57	34	0	0	1	1	0	0
9	0	0	83	22.22	0	113	1	1	1	54	139	54	4.51	182	0.233	4.71	6	2.26	100	1	1	1	1	0	3	1	1	0	0	0	0	0	0	2	0	0	0	0	42	41	28	53	26	0	1	1	1	0	1
10	0	0	70	43.56	0	90	1	0	1	70	120	66	8.25	405	16	7.02	27	2.3	48	0	1	1	0	1	2	1	1	0	0	0	0	0	0	1	0	0	0	1	52	28	28	40	27	0	0	1	0	0	0
13	0	1	75	19.13	1	120	1	0	1	58	110	70	3.6	115	16	5.22	48	2.68	89	1	1	1	1	0	1	0	1	0	0	0	0	0	0	2	0	2	1	1	54	38	36	57	29	0	1	1	0	0	1
8	0	1	68	23.83	1	141	0	1	0	96	178	96	9.36	257	0.732	6.7	26	2.53	218	0	1	1	1	0	2	0	1	1	0	0	0	0	0	0	1	1	0	0	69	35	30	48	29	1	1	1	0	0	0
11	0	0	69	24.44	0	118	0	0	0	89	118	84	10.17	146	0.752	6	13	3.02	80	0	1	1	1	0	2	0	1	0	0	0	1	0	0	2	0	1	0	0	31	38	28	56	26	0	0	0	1	0	0
12	1	1	37	21.7193	1	163	1	0	1	111	133	80	12.78	213	6.98	13.69	31.1	5.19	73	1	1	1	1	0	1	1	0	0	0	0	0	0	0	1	0	0	0	0	48	35	36	46	16	0	1	0	0	0	0
4	0	1	49	27.34	1	170	1	0	1	65	160	100	7.48	205	0.275	6.52	34	2.78	50	0	1	1	1	0	1	0	0	0	0	0	0	0	0	1	0	0	0	0	54	33	30	49	29	0	1	0	0	0	0
8	0	0	77	19.81	0	119	1	1	1	81	198	96	10.4	190	10.296	7.64	25	1.94	87	0	1	1	1	0	1	1	1	0	0	0	0	0	0	1	0	0	0	0	54	33	30	49	29	0	1	1	0	0	0
8	1	1	74	24.2215	1	123	1	0	0	71	159	98	7.52	167	0.027	5.09	28.4	3.77	72	1	1	1	1	0	1	0	1	0	0	0	0	0	0	1	1	1	0	1	40	37	38	60	20	0	1	0	0	0	0
9	1	1	89	23.94	0	101	0	0	0	97	112	70	2.94	135	6.299	4.92	19	1.38	181	0	1	0	1	0	1	1	1	0	0	0	0	1	1	1	0	0	0	0	54	33	30	49	29	0	0	0	0	0	0
12	1	1	71	23.83	1	132	1	0	1	65	124	62	11.7	227	10.827	7.79	26	3.73	73	0	1	1	1	0	1	1	1	0	0	0	0	0	0	0	1	0	1	1	67	27	28	46	27	0	1	1	0	0	0
6	0	1	60	22.1	1	144	1	0	1	73	137	80	8.38	147	16	6.29	32	1.71	87	1	1	1	1	0	1	0	1	0	0	0	0	0	0	1	0	0	0	0	43	37	33	58	30	0	1	0	0	0	0
27	0	1	81	20.2	0	124	0	0	1	70	137	79	5.66	106	11.25	6.05	30	1.72	103	0	1	1	1	0	1	0	1	0	0	0	0	0	0	1	1	1	1	0	35	27	31	50	31	0	1	0	0	0	0
4	1	0	87	22.48	0	130	0	0	0	88	155	85	13.33	224	7.781	6.04	19	3.58	76	0	1	1	1	0	2	0	0	1	0	0	0	1	0	1	0	0	0	0	54	33	30	49	29	0	0	0	0	0	0
13	1	1	62	23.8751	1	167	1	0	1	70	150	80	11.33	185	2.82	4.03	35.2	3.98	84	1	1	1	1	0	2	0	0	0	0	0	0	0	0	1	0	1	0	0	50	31	37	47	18	0	1	0	0	0	0
7	1	1	60	22.83	1	123	1	0	1	104	145	82	14.46	255	16	9.11	70	1.97	42	0	1	1	1	0	1	1	1	0	0	0	0	0	0	1	0	1	1	0	45	36	31	46	30	0	1	0	0	0	0
29	0	0	63	24.4444	0	131	0	1	0	102	196	84	10.01	152	0.024	6.45	13	3.15	66.3	1	1	0	0	0	2	1	1	0	0	1	0	0	0	1	0	0	0	1	71	37	29	46	20	0	0	0	1	0	0
9	1	1	45	26.3329	1	143	0	0	0	61	110	60	11.48	291	6.48	4.74	30.2	2.85	76	1	1	1	1	0	1	0	0	0	0	0	0	0	0	1	2	1	0	0	46	30	38	50	17	0	1	1	0	0	1
7	1	1	36	25.5	1	142	1	1	1	72	134	78	11.63	308	0.041	5.8	18	2.27	97	1	1	1	1	0	1	0	1	0	0	1	1	0	0	0	0	0	0	0	38	44	33	70	32	0	1	1	0	0	0
7	1	0	73	19.23	1	116	1	0	1	69	130	70	3.64	127	2.028	4.46	25	1.61	75	1	1	1	1	0	1	0	1	0	0	0	0	0	0	1	1	1	0	0	43	35	23	45	24	0	1	0	0	0	0
8	1	1	74	23.4236	1	125	1	0	1	90	105	70	9.59	158	43	4.78	41.6	1.73	93	1	1	1	1	0	1	0	0	1	0	0	0	0	0	1	1	1	0	1	58	31	40	50	18	0	1	0	0	0	0
7	1	0	79	24.1217	0	117	1	1	1	75	160	90	5.19	186	12	20.98	15.3	3.01	69	0	1	1	0	1	1	1	1	0	0	0	0	0	0	0	1	0	0	1	60	37	36	50	18	0	1	0	0	0	0
8	1	1	78	26.78	0	144	1	1	0	63	143	73	8.88	164	16	5.6	42	2.29	88	1	1	1	0	1	2	0	1	1	0	0	0	1	0	0	0	0	0	0	46	29	32	49	31	0	0	0	0	0	0
10	0	1	73	25.46	1	157	1	0	1	100	138	100	7.89	125	0.13	5.17	16	2.27	75	0	1	1	1	0	1	0	0	0	0	1	1	0	0	1	0	0	0	0	54	33	30	49	29	0	1	1	0	0	0
12	1	1	79	28.76	0	136	1	0	1	65	130	80	4.94	133	0.224	5.58	23	2.46	100	1	1	1	1	0	1	0	1	0	0	0	0	0	0	0	0	0	0	0	58	28	33	47	29	0	0	1	1	0	0
28	0	1	75	24.24	0	130	0	0	0	77	167	80	13.22	141	7.05	8.53	34	2.52	87	1	1	1	0	1	3	1	1	1	0	1	1	1	0	3	1	2	0	0	35	49	37	54	33	0	0	0	0	0	0
8	0	1	73	28.28	1	92	0	0	1	65	110	66	9.97	166	1.13	3.68	17	1.64	207	1	1	1	1	0	1	0	0	0	0	1	0	0	0	0	0	0	0	1	60	36	33	47	35	0	1	0	0	0	0
11	0	1	54	24	1	68	1	0	1	99	148	88	11.77	160	6.468	6.7	48	1.14	72	1	1	1	1	0	1	1	1	0	0	1	1	0	0	0	0	0	0	0	69	30	34	53	28	0	1	0	0	0	0
10	0	0	77	23.52	0	96	1	1	1	107	144	90	10.42	289	2.81	16.69	25	2.06	132	0	1	1	1	0	4	1	1	0	0	1	1	0	1	1	0	0	0	0	54	33	30	49	29	0	0	0	1	0	0
8	0	0	61	24.44	0	140	1	1	1	85	152	90	8.33	256	0.135	15.83	45	3.64	64	1	1	1	1	0	2	1	1	0	0	0	0	0	0	1	0	0	0	0	50	32	28	53	24	1	1	0	0	0	0
5	1	1	73	25.71	0	153	1	1	1	94	215	107	9.4	282	16	7.59	53	3	62	1	1	1	0	1	1	0	1	0	0	0	0	0	0	0	0	0	0	0	73	31	27	48	27	0	1	0	0	0	0
17	0	1	73	27.6398	0	129	1	1	1	93	160	101	5.9	154	7.6	6.2	9.7	2.43	66	1	1	1	1	0	1	1	1	0	0	0	1	1	0	0	1	1	0	1	51	35	35	49	19	0	1	0	0	0	0
13	1	1	75	24.2439	1	136	0	0	0	75	110	70	11.26	162	0.098	7	157	3.37	53	1	1	1	1	0	2	0	1	0	0	0	0	0	0	2	1	2	1	0	36	36	39	47	18	0	1	0	0	0	0
4	1	1	49	27.94	1	136	1	0	0	66	112	80	6.96	181	0.001	4.81	38	2.09	70	1	1	1	1	1	4	0	1	0	1	0	0	0	1	0	0	0	0	0	25	25	33	55	33	0	1	1	0	0	0
11	0	0	69	25.97	0	124	0	1	0	66	192	88	7.05	153	1.473	2.95	17	5.85	79	0	1	1	1	0	4	1	1	0	0	0	1	0	0	1	0	0	0	0	54	33	30	49	29	0	0	0	0	0	0
14	1	1	77	21.3039	1	153	1	0	1	90	130	80	8.34	154	0.024	4.61	27.5	3.87	106	1	1	1	1	0	2	0	1	1	0	0	0	0	0	1	1	0	0	1	60	31	31	48	17	0	1	0	0	0	0
23	0	1	60	21.67	1	128	1	1	0	89	137	97	12.15	181	0.001	7.4	76	1.1	154	0	1	1	1	0	1	1	1	1	0	0	1	0	0	1	0	0	0	0	54	33	30	49	29	0	0	0	0	0	0
9	1	1	59	23.4236	1	144	1	1	1	83	130	80	8.64	199	64	18.1	68.2	3.14	73	1	1	1	1	0	1	1	0	0	0	0	0	0	0	1	0	0	0	1	56	31	33	45	20	0	1	0	0	0	0
13	1	1	62	20.43	0	129	0	0	1	50	114	52	11.24	142	16	3.11	58	2.76	129	0	1	1	0	1	1	0	1	0	0	0	0	0	0	1	1	1	0	0	49	29	33	53	32	0	1	0	0	0	1
8	1	1	39	26.45	1	155	1	0	1	55	120	72	6.41	293	3.288	5.22	37	1.84	83	1	1	1	0	1	1	0	0	0	0	0	0	0	0	1	0	0	0	0	54	33	30	49	29	0	1	0	0	0	1
9	0	0	78	19.4	0	111	1	1	1	74	166	66	5.01	150	1.042	4.43	28	2.64	91	0	1	1	1	0	2	0	1	0	0	0	1	0	0	3	0	0	0	1	43	46	31	74	28	0	1	0	0	0	0
7	0	0	64	26.93	0	121	1	0	1	63	121	67	3.69	217	0.857	4.93	14	3	60	0	1	1	0	1	1	1	1	0	0	0	0	0	0	1	0	0	1	0	65	27	34	46	28	0	1	0	0	0	0
10	1	1	68	21.3	0	133	0	1	1	75	134	90	7.84	184	0.001	4.36	29	1.55	115	1	1	1	1	0	1	0	1	0	0	0	0	0	0	0	0	1	0	1	42	35	33	51	26	0	1	1	1	0	0
26	1	1	84	23.4375	0	112	1	1	1	96	148	76	14.21	232	2.19	4.52	41.6	2.41	72	0	1	1	1	0	2	0	1	1	0	0	0	0	0	0	1	1	0	1	42	35	35	51	19	0	0	1	1	0	0
13	0	1	68	25.71	1	126	1	0	1	56	120	80	6.57	155	2.582	5.77	24	4.41	84	0	1	1	0	1	1	0	1	0	0	0	0	0	0	0	1	0	1	0	61	28	28	47	28	0	1	0	0	0	1
7	1	1	51	23.03	0	143	1	0	1	61	135	89	8.8	276	16	5.68	22	3.32	117	1	1	1	0	1	1	1	1	0	0	0	0	0	0	0	0	1	0	1	72	32	30	43	28	0	1	0	0	0	0
7	0	1	59	23.63	1	163	0	0	1	89	118	70	7.92	189	4.196	4.96	30	4.25	66	0	1	1	1	0	1	0	0	0	0	0	0	0	0	1	1	1	1	1	61	29	29	44	25	1	0	0	0	0	0
9	1	0	64	18.59	1	121	1	1	1	74	164	106	11.63	368	16	5.13	43	3.32	37	0	1	1	1	0	1	0	0	0	0	0	0	0	0	1	1	0	1	0	53	36	31	50	25	0	1	0	0	0	0
12	1	1	58	24.22	1	141	1	0	1	86	128	68	10.31	220	16	6.51	33	3.93	89	1	1	1	1	0	1	0	0	0	0	0	0	0	0	0	0	0	0	1	58	31	29	40	25	0	1	0	0	0	0
9	1	0	65	22.43	0	128	1	0	1	73	114	57	16.79	127	16	6.7	110	2.23	62	0	1	1	1	0	1	0	0	0	0	0	0	0	0	1	0	0	0	1	46	30	27	48	29	0	1	0	0	0	0
5	1	1	45	26.93	1	159	1	0	1	64	132	90	6	286	0.933	8.31	45	3.1	76	1	1	1	1	0	1	0	0	0	0	0	0	0	0	0	0	0	1	1	51	30	31	51	27	0	1	0	0	0	0
9	1	1	38	28.08	1	159	1	0	1	69	140	86	8.06	186	10.012	3.81	49	4.87	86	1	1	1	1	0	1	1	0	0	0	0	0	0	0	0	0	0	0	0	60	30	26	52	26	0	1	0	0	0	0
6	1	1	74	20.31	1	133	1	1	0	80	150	80	11.19	136	16	5.58	46	0.91	96	0	1	0	1	0	2	0	1	0	0	0	0	1	0	1	0	0	0	0	54	33	30	49	29	0	1	0	0	0	0
7	0	1	44	31.14	1	140	1	0	1	72	134	82	7.2	186	13.008	5.34	61	1.82	61	1	1	1	1	0	1	0	1	0	0	0	0	0	0	1	0	0	0	0	54	33	30	49	29	0	1	0	0	0	0
5	0	1	79	22.04	0	131	1	0	1	67	158	70	6.65	180	0.001	5.15	18	2.98	81	0	1	1	1	0	1	0	1	0	0	0	0	0	0	0	3	0	0	1	54	32	32	59	34	0	1	0	0	0	0
3	1	1	65	25.1	1	122	0	0	0	58	90	64	6.39	170	0.095	6.6	49	2.87	87	1	1	1	1	0	1	0	0	1	0	0	0	0	0	1	0	0	0	0	54	33	30	49	29	0	1	0	0	0	1
6	0	1	68	19.95	1	118	1	0	1	96	142	78	6.06	170	6.288	4.59	12	2.95	72	1	1	1	1	0	1	0	0	1	0	0	0	0	0	0	0	0	1	0	62	32	32	48	29	0	0	0	0	1	0
4	1	1	62	21.26	1	146	1	0	1	69	132	80	6.22	243	0.1	4.55	35	2.33	79	1	1	1	1	0	1	0	0	0	0	0	0	0	0	0	0	1	1	1	53	29	36	46	36	0	1	0	0	0	0
4	1	1	35	27.03	1	160	1	0	1	74	120	90	5.17	241	0.05	5.22	69	2.25	80	0	1	1	1	0	1	0	0	0	0	0	0	0	0	0	0	0	0	0	69	35	25	46	23	0	1	0	0	0	0
6	0	1	50	23.44	1	124	1	1	1	95	172	123	11.68	349	0.01	15.61	32	3.51	69	1	1	1	1	0	1	1	1	0	0	0	0	0	0	1	1	0	0	1	55	32	20	52	23	0	1	0	0	0	0
11	0	1	49	31.57	0	149	1	0	1	90	118	70	15.8	147	15.42	5.49	38	2.87	67	1	1	1	1	0	1	0	0	0	0	0	0	0	0	0	0	0	0	1	60	34	29	53	30	0	1	0	0	0	0
8	1	1	77	26.85	0	98	1	0	1	74	120	80	5.81	88	16	6.51	53	2.06	71	0	1	1	1	0	1	0	1	0	0	0	0	0	0	1	0	1	1	1	52	39	29	55	32	0	1	0	0	0	0
10	1	0	55	21.88	0	139	1	0	1	79	130	90	8.44	171	6.137	13.1	45	0.16	34	0	1	1	1	0	1	1	0	0	0	0	0	0	0	1	0	0	0	0	54	33	30	49	29	0	1	0	0	0	0
11	1	1	74	25.71	1	140	1	1	1	62	168	80	9.99	314	16	10.65	33	3.96	88	1	1	1	1	0	1	1	1	0	0	0	0	0	0	1	0	0	0	0	54	33	30	49	29	0	0	0	0	0	0
9	0	1	50	22.84	1	137	1	0	1	87	118	74	10.86	266	10.07	7.33	36	5.98	72	1	1	1	1	0	1	1	0	0	0	0	0	0	0	1	0	1	0	1	56	34	32	46	32	0	1	0	0	0	0
11	0	1	60	27.34	1	114	0	0	1	84	102	70	8	91	6.94	12.04	33	2.04	88	0	1	1	1	0	1	1	1	0	0	0	0	0	0	0	0	0	0	0	57	37	24	68	24	0	1	1	0	0	0
20	1	0	78	25.39	0	147	1	0	1	65	130	70	6.59	200	16	3.7	51	3.96	58	1	1	1	1	0	1	0	1	0	0	0	0	0	0	0	0	0	0	1	50	32	30	40	22	0	1	0	0	0	0
12	0	1	69	25.95	1	104	1	1	1	72	120	80	8.42	141	0.22	6.61	22	1.79	106	0	1	1	1	0	1	1	1	1	0	0	1	0	0	0	0	0	1	1	75	39	28	39	27	0	1	0	0	0	0
9	0	1	67	24	1	135	1	1	1	87	200	90	11.3	134	9.568	5.64	36	2.75	101	1	1	1	0	1	1	0	1	0	0	0	1	0	0	2	0	0	0	0	33	40	39	57	27	0	1	0	0	0	0
3	1	1	75	41.91	1	134	1	0	1	91	144	80	8.4	126	16	5.58	45	2.1	107	0	1	1	1	0	2	0	1	0	0	0	0	0	0	1	0	0	0	0	54	33	30	49	29	0	1	0	0	0	0
10	0	1	84	22.76	1	125	1	0	1	82	170	90	5.78	185	0.94	4.82	20	2.13	105	0	1	1	1	0	3	0	1	0	0	0	1	1	0	1	0	0	0	0	54	33	30	49	29	0	0	0	1	0	0
7	1	0	76	24.39	0	118	1	0	1	86	142	78	10.3	200	0.62	7	63	2.06	63	1	1	1	1	0	1	0	1	0	0	0	0	0	0	1	0	0	0	1	55	37	28	49	24	0	1	0	0	0	0
12	1	0	73	24.977	1	133	0	0	0	56	139	76	7.58	114	0.016	6.6	36.4	2.86	57	1	1	1	1	0	1	1	1	0	0	1	0	1	0	1	1	1	0	0	48	33	36	51	20	0	1	0	0	0	1
8	0	0	35	24.24	0	115	0	0	0	64	102	48	7.09	229	16	4.31	19	2.5	64	1	1	1	1	0	1	0	0	0	0	0	0	0	0	0	0	0	0	0	62	30	27	43	28	0	1	0	0	0	0
8	0	1	54	24.84	1	134	1	0	1	90	146	95	7.94	199	14.808	7.96	45	2.63	74	0	1	1	1	0	1	1	1	0	0	0	0	0	0	1	0	0	0	0	54	33	30	49	29	0	1	0	0	0	0
4	1	1	58	27.64	1	165	1	0	1	74	90	58	12.83	146	5.55	5.05	33	2.65	83	1	1	1	1	0	1	0	0	0	0	0	0	0	0	0	0	0	0	0	62	24	26	51	29	0	1	0	0	0	0
14	0	0	76	22.77	0	88	1	0	1	76	130	60	6.05	107	1.011	9.32	40	1.45	91	0	1	1	1	0	1	1	1	1	0	0	0	0	0	1	0	0	0	1	62	35	33	35	30	1	0	1	0	0	0
7	1	1	71	27.3438	0	128	1	1	1	70	130	70	7.72	242	0.5	4.44	23.2	2.27	117	1	1	1	0	1	1	0	1	1	0	0	0	0	0	1	1	1	0	1	48	28	34	45	16	0	1	0	0	0	0
9	1	1	53	26.99	0	155	1	1	1	70	154	94	6.14	204	0.86	4.83	52	2.3	89	1	1	1	1	0	1	0	1	0	0	0	0	0	0	0	1	0	0	1	61	36	24	44	29	0	1	0	0	0	0
12	0	1	58	21.71	0	110	1	0	1	68	80	50	12.37	193	15.78	5.68	21	1.95	88	1	1	1	1	0	1	0	0	0	0	0	0	0	0	1	0	0	0	0	58	36	27	53	27	0	1	0	0	0	0
5	1	0	75	25.5588	1	118	0	0	0	84	100	60	9.83	161	0.229	10.05	19.6	2.73	61.6	0	1	1	1	0	3	1	1	1	0	0	0	0	0	2	1	1	0	0	39	35	32	58	16	0	0	0	1	0	0
10	0	1	71	24.841	1	118	1	0	1	80	120	75	9.72	182	0.933	5.25	11.6	2.35	89	1	1	1	1	0	2	0	1	1	0	0	0	0	0	1	0	1	0	1	64	31	38	49	19	0	1	0	1	0	0
8	0	0	80	28.54	0	121	1	0	1	90	137	81	10.77	180	7.426	7.4	73	2.94	68	1	1	1	1	0	2	0	1	0	0	0	0	0	0	0	1	1	0	0	38	28	24	46	22	0	1	0	0	0	0
7	1	1	66	25.86	1	154	1	0	1	62	140	80	12.01	114	16	7.36	69	3.6	78	1	1	1	1	0	1	0	1	1	0	0	0	0	0	0	0	0	0	0	56	32	28	52	28	0	1	0	0	0	0
7	0	1	57	31.22	1	139	1	0	1	65	132	89	12.75	183	16	5.07	79	3.32	60	0	1	1	1	0	1	0	1	0	0	0	0	0	0	1	0	0	0	0	54	33	30	49	29	0	1	0	0	0	0
23	1	1	60	19.82	1	119	1	0	1	81	100	60	8.74	171	6.34	3.87	42	2.33	73	1	1	1	1	0	4	0	0	0	0	0	0	0	1	2	0	1	0	1	49	37	27	57	28	0	1	0	0	0	0
6	0	1	50	26.56	0	147	1	0	1	74	122	68	13.17	179	8.892	4.57	24	1.73	81	1	1	1	1	0	1	0	0	0	0	0	0	0	0	0	0	0	0	1	67	33	30	47	26	0	1	0	0	0	0
7	1	0	55	22.43	0	106	0	0	0	56	144	76	7.7	155	16	6.15	36	1.63	56	1	1	1	1	0	1	0	0	0	0	0	0	0	0	1	1	0	0	1	56	35	30	59	23	0	1	0	0	0	1
6	1	0	61	25.63	1	141	1	1	1	110	198	120	16	225	16	11.96	62	2.89	66	1	1	1	1	0	1	1	1	0	0	0	0	0	0	2	0	1	0	1	56	34	30	50	24	0	1	0	0	0	0
7	1	1	87	18.37	0	113	1	0	1	72	148	72	10.3	166	16	4.18	45	2.17	102	0	1	1	1	0	1	0	1	0	0	0	0	0	0	1	0	0	0	1	66	35	33	44	33	0	1	0	0	0	0
10	1	0	67	23.23	0	115	1	0	1	80	144	76	6.93	95	16	5.13	39	3.59	55	1	1	1	1	0	2	0	1	0	0	0	0	0	0	2	1	2	1	1	57	37	28	48	27	0	1	0	0	0	0
8	1	1	57	22.48	1	154	1	1	1	66	166	94	7.67	205	12.52	6.4	20	2.56	59	1	1	1	1	0	1	1	1	0	0	0	0	0	0	0	0	1	0	1	56	34	33	56	33	0	1	0	0	0	0
25	0	0	72	25.89	0	124	0	0	1	76	173	117	5.27	139	16	6.06	39	1.78	59	0	1	1	1	0	1	0	1	1	0	0	0	0	0	0	0	0	0	0	82	35	35	46	23	0	0	0	0	0	0
7	1	1	82	21.8	1	110	0	0	1	78	110	70	5.61	181	0.027	5.43	7	1.46	114	1	1	1	1	0	1	0	1	1	0	0	1	0	0	1	2	1	1	0	52	35	33	49	34	0	1	0	0	0	0
9	0	0	67	27.55	1	119	1	1	1	68	130	70	9.31	152	1.08	5.25	28	2.73	102	1	1	1	1	0	3	0	1	0	0	0	0	0	0	1	0	0	0	1	53	34	33	47	29	0	1	0	1	0	0
6	1	1	34	22.11	1	137	1	0	1	64	92	50	5.05	168	0.94	4.24	67	3.04	88	1	1	1	1	0	1	0	0	0	0	0	0	0	0	1	0	0	1	0	65	29	30	47	26	0	1	0	0	0	0
10	1	1	51	20.31	1	134	1	0	1	88	118	70	8.02	214	14.13	5.08	21	1.98	150	1	1	1	1	0	1	0	0	0	0	0	0	0	0	1	0	1	1	1	54	32	30	55	27	0	1	0	0	0	0
10	1	0	71	21.4	0	117	1	0	0	68	136	76	7.57	265	16	6.94	53	4.04	57	0	1	1	1	0	2	0	0	0	0	0	0	0	0	1	0	1	0	1	62	35	29	45	27	0	1	0	0	0	0
6	1	1	55	23.03	1	140	1	0	1	70	140	90	16.75	221	4.99	9.51	136	4.6	73	1	1	1	1	0	1	1	0	0	0	0	0	0	0	1	0	1	0	1	68	29	28	47	25	0	1	0	0	0	0
4	1	0	72	20.55	0	97	1	0	1	76	168	76	8.79	218	2.37	9.25	54	1.23	55	1	1	1	1	0	1	1	1	0	0	0	0	0	0	1	0	0	0	0	54	33	30	49	29	0	1	1	0	0	0
4	0	0	55	20	0	117	1	0	1	86	110	74	7.93	196	1.05	5.48	13	2.62	56	0	1	1	1	0	1	0	1	0	0	0	0	0	0	1	0	0	0	1	57	35	27	53	24	1	1	0	0	0	0
8	1	0	69	20.81	0	87	1	0	1	96	94	62	13.18	204	16	7.5	97	3.5	63	1	1	1	1	0	1	1	0	0	0	0	0	0	0	0	0	0	0	1	71	30	24	39	22	0	1	0	0	0	0
9	1	0	70	26.03	0	103	0	0	1	62	102	56	8.4	95	15.858	6.35	66	1.29	86	0	1	1	1	0	1	0	1	0	0	0	0	0	0	1	0	0	0	0	54	33	30	49	29	0	1	1	0	0	0
7	1	0	65	23.94	0	139	1	0	1	88	120	78	7.49	243	0.162	4.86	19	2.28	89	1	1	1	1	0	1	0	1	0	0	0	0	0	0	0	0	0	0	1	75	28	29	43	26	0	1	0	0	0	0
20	1	1	70	23.44	1	110	1	0	1	72	106	76	15.66	226	0.472	9.72	18	2.37	76	1	1	1	1	0	4	0	0	0	0	0	0	0	0	2	1	2	0	0	52	38	28	63	28	0	1	0	0	0	0
12	1	0	56	27.06	0	128	1	1	1	68	160	95	11.73	162	16	4.96	40	2.81	61	1	1	1	1	0	1	0	0	0	0	0	0	0	0	0	0	0	0	1	52	35	26	44	31	0	1	0	0	0	0
7	1	1	85	26.64	0	135	0	0	1	87	126	84	8.88	147	6.524	14.79	24	2.9	88	0	1	1	1	0	2	1	1	1	0	0	0	0	0	0	1	0	0	0	42	33	33	51	30	0	1	0	0	0	0
8	1	0	65	21.64	0	127	1	1	1	59	124	80	9.16	116	16	4.79	130	2.84	54	1	1	1	1	0	1	0	1	0	0	0	0	0	0	1	1	1	0	1	70	36	31	48	29	0	1	0	0	0	1
5	1	1	50	33.22	1	155	1	0	1	72	101	60	11.63	213	16	7.75	52	2.2	81	0	1	1	1	0	1	0	0	0	0	0	0	0	0	1	0	0	0	0	54	33	30	49	29	0	1	1	0	0	0
14	0	1	74	23.4236	0	122	1	0	1	85	100	60	7.91	192	6.26	5.54	39.1	2.88	87	1	1	1	1	0	2	0	0	1	0	0	0	0	0	0	1	0	0	1	46	36	35	50	19	0	1	0	0	0	0
8	1	1	63	20.2	1	124	1	0	1	80	127	94	9.86	166	16	4.31	30	1.67	132	0	1	1	1	0	1	0	1	0	0	0	0	0	0	0	0	2	1	1	81	34	31	40	28	0	1	0	0	0	0
21	1	0	76	24.0882	0	123	1	0	1	74	145	100	9.03	146	5.77	6.99	8.7	3.94	61.7	1	1	1	1	0	2	0	1	1	0	0	1	0	0	0	1	1	0	0	60	38	51	44	19	0	1	0	0	0	0
12	1	0	66	24.974	1	122	1	1	1	68	180	90	8.03	160	3.43	5.49	18	2.28	64	0	1	1	1	0	1	0	1	0	0	0	0	0	0	1	1	1	0	0	63	36	39	40	16	0	0	1	0	0	1
12	1	1	48	25.83	1	152	1	0	1	46	158	92	11.42	154	16	5.09	33	2.29	87	1	1	1	1	0	1	1	0	0	0	0	0	0	0	1	0	0	0	0	54	33	30	49	29	0	0	1	0	0	1
10	1	0	74	21.37	0	117	1	1	1	70	156	90	5.29	238	12.34	6	23	2.32	57	1	1	1	1	0	1	0	1	0	0	0	0	0	0	0	0	1	0	1	61	31	30	44	28	0	1	0	0	0	0
6	1	0	77	24.03	0	98	1	0	1	73	118	60	7.71	86	1.877	4.33	11	2.09	89	1	1	1	1	0	1	0	1	0	0	0	0	0	0	1	0	0	0	0	54	33	30	49	29	0	1	0	0	0	0
10	0	1	48	21.22	0	141	0	0	1	91	80	55	10.98	178	16	6.7	43	2.03	151	0	1	1	1	0	1	0	1	0	0	0	0	0	0	0	0	0	0	1	52	32	33	57	32	0	1	0	0	0	0
7	0	1	57	24.22	1	139	1	0	1	68	136	62	8.06	138	16	5.36	25	1.75	72	0	1	1	1	0	1	0	0	0	0	0	0	0	0	1	0	0	0	0	54	33	30	49	29	0	1	0	0	0	0
11	1	1	45	20.76	1	163	1	0	1	68	130	70	15.98	218	16	4.86	87	2.42	77	1	1	1	1	0	1	0	0	0	0	0	0	0	0	0	0	0	0	1	62	26	30	48	32	0	1	0	0	0	0
5	1	1	62	20.18	1	144	1	0	1	70	100	66	4.8	155	0.001	4.58	22	3.23	76	0	1	1	1	0	1	0	0	0	0	0	0	0	0	1	0	0	0	1	58	27	35	49	36	0	1	0	0	0	0
9	1	1	72	20.66	1	151	1	0	1	66	126	76	6.31	263	0.356	4.2	40	0.86	79	1	1	1	1	0	1	0	1	0	0	0	0	0	0	0	1	0	0	0	64	34	30	41	28	0	1	0	0	0	0
31	0	0	59	22.73	0	132	1	0	1	119	120	80	17.28	186	2.964	6.28	23	2.07	57	0	1	1	1	0	3	1	1	0	0	0	0	0	0	1	0	1	1	1	50	36	22	50	34	1	1	1	1	0	0
10	0	1	75	18.73	0	122	1	0	1	135	105	77	14.89	157	5.472	7.42	29	2.53	104	0	1	0	1	0	3	0	1	0	0	0	0	0	0	1	0	0	0	0	54	33	30	49	29	0	1	1	1	0	0
10	1	1	52	22.86	1	118	1	0	1	63	104	78	11.25	140	0.001	3.61	15	1.18	106	1	1	1	1	0	1	0	0	0	0	0	0	0	0	1	0	0	0	0	54	33	30	49	29	0	1	0	0	0	0
17	0	0	55	30.8	0	122	1	0	1	92	99	63	13.02	228	5.042	9.2	49	1.81	93	0	1	1	1	0	3	1	1	0	0	0	0	0	0	3	0	2	0	0	47	46	37	51	30	0	0	1	0	0	0
8	1	1	58	22.23	1	155	1	0	1	93	134	90	11.86	98	16	5.87	76	2.09	91	1	1	1	1	0	1	0	0	0	0	0	0	0	0	1	0	0	0	1	54	29	28	48	29	0	1	0	0	0	0
10	1	0	64	19.53	0	115	1	0	1	84	104	61	9.96	260	15.064	6.02	22	2.85	59	0	1	1	1	0	1	0	0	0	0	0	0	0	0	1	0	0	0	0	54	33	30	49	29	0	1	0	0	0	0
12	0	1	72	24.14	1	114	1	0	1	82	158	76	8.34	225	4.416	5.63	47	2.93	137	0	1	1	1	0	2	0	1	0	0	0	1	0	0	2	0	1	1	0	66	34	30	50	32	0	0	1	0	0	0
18	1	0	65	19.59	0	69	1	0	1	104	100	76	10.59	506	16	4.05	44	2.44	56	0	1	1	1	0	1	0	0	0	0	0	0	0	0	3	1	2	1	1	43	36	37	50	33	0	1	1	0	0	0
7	1	0	49	23.5	0	122	1	0	1	55	136	74	9.53	154	4.103	3.93	51	2.35	50	1	1	1	1	0	1	1	1	0	0	0	0	0	0	1	0	0	0	1	70	32	29	47	30	0	1	0	0	0	1
7	0	1	43	28.2	1	136	1	1	0	70	118	82	17.24	195	16	4.77	44	3.14	95	0	1	1	1	0	1	0	0	0	0	0	0	0	0	1	0	0	0	1	58	33	25	54	30	0	1	0	0	0	1
11	1	0	66	21.4844	0	118	1	0	1	65	110	80	8.76	146	0.821	10.22	17.6	2.65	70.3	1	1	1	1	0	2	0	1	0	0	0	0	0	0	0	0	0	0	1	37	27	33	40	17	1	1	0	0	0	0
8	0	0	66	28.3	0	128	1	1	1	76	155	80	6.68	184	2.97	5.68	55	4.36	70	0	1	1	1	0	1	0	1	0	0	0	0	0	0	1	1	0	1	1	62	36	34	46	35	0	1	1	0	0	0
10	0	1	69	24.57	1	81	1	1	1	91	166	98	8.6	148	5.474	7.89	20	3.33	203	0	1	1	1	0	1	1	1	0	0	0	0	0	0	0	0	0	0	1	63	37	31	47	30	0	1	0	0	0	0
14	1	0	59	19.4771	0	124	1	0	1	102	170	103	8.99	214	0.221	12.02	11.1	2.27	90.4	1	1	1	1	0	2	1	1	0	0	1	1	0	0	1	1	1	0	1	51	35	35	49	19	0	1	0	0	0	0
23	1	1	75	21.97	1	134	0	0	1	92	106	71	10.15	149	11.493	6.7	28	2.13	152	0	1	1	1	0	4	1	0	0	0	0	0	0	1	1	1	1	0	0	33	31	24	52	24	0	1	1	0	0	0
9	0	1	76	21.26	0	139	1	0	1	100	118	88	6.74	205	0.001	5.14	6	2.38	111	1	1	1	0	1	1	0	1	0	0	0	0	0	0	3	0	1	0	0	34	43	36	58	31	0	0	1	1	0	0
12	1	1	64	26.56	1	141	1	0	1	89	116	82	10.01	166	16	6.7	88	1.84	77	1	1	1	1	0	2	1	0	0	0	0	0	0	0	0	1	0	0	0	52	34	31	56	29	0	1	1	0	0	0
8	1	1	63	22.76	1	146	1	0	1	76	122	92	9.4	243	16	4.49	29	2.16	66	1	1	1	1	0	2	0	0	0	0	0	0	0	0	1	0	0	0	1	62	29	26	45	28	0	1	0	0	0	0
8	1	1	37	25.63	1	137	0	0	0	79	90	60	5.98	221	6.223	6.7	88	2.8	88	0	1	1	1	0	1	0	0	0	0	0	0	0	0	1	0	0	0	0	64	37	31	37	32	0	0	1	0	0	0
6	0	1	53	30.46	0	132	1	1	1	78	158	98	10.8	155	16	14.05	39	2.58	59	0	1	1	1	0	2	1	1	0	0	0	0	0	0	1	0	0	0	0	54	33	30	49	29	0	1	0	0	0	0
7	0	1	58	22.49	1	156	1	1	1	54	182	118	6.19	243	0.001	5.53	19	3.51	94	1	1	1	1	0	1	0	1	0	0	0	0	0	0	0	0	0	0	1	54	33	32	55	32	0	1	0	0	0	1
10	1	1	38	26.64	1	151	1	0	1	88	124	64	13.26	160	16	5.06	57	2.04	68	1	1	1	1	0	1	0	0	0	0	0	0	0	0	0	0	0	1	1	68	25	28	43	32	0	1	0	0	0	0
4	1	1	70	20.2	1	104	1	0	0	57	138	80	6.25	158	16	4.31	34	2.79	104	0	1	1	1	0	1	0	1	0	0	0	0	0	0	1	0	1	0	1	64	30	31	46	33	0	1	0	0	0	1
15	0	1	80	23.91	1	111	0	0	1	60	80	60	12.56	145	10.138	4.85	61	1.6	83	1	1	1	1	1	4	1	1	1	0	0	0	0	0	0	1	0	0	0	49	35	33	61	28	0	0	0	0	0	0
9	0	1	73	24.41	1	133	1	0	1	76	170	90	10.21	204	16	5.1	72	2.57	90	1	1	1	1	0	1	1	0	0	0	0	0	1	0	1	1	1	0	1	59	27	25	50	28	0	1	1	0	0	0
11	1	1	81	21.77	1	116	1	0	1	72	116	76	5.9	142	1.854	5.8	99	1.54	115	1	1	1	1	0	1	0	1	0	0	0	0	0	0	1	0	3	0	1	37	39	44	52	32	0	1	0	0	0	0
17	1	1	58	24.52	1	134	1	0	1	82	121	74	8.2	183	14.98	5.48	49	3.95	73	1	1	1	1	0	2	0	0	0	0	0	0	0	0	2	1	1	1	1	48	29	30	41	30	0	1	1	0	0	0
15	0	1	61	26.3	1	145	1	1	1	69	136	78	11.07	184	12.087	8.42	25	2.16	152	0	1	1	1	0	1	1	1	0	0	0	0	0	0	2	0	0	0	1	37	34	33	68	32	0	1	0	0	0	0
11	1	1	68	20.32	0	144	1	0	1	96	152	88	6.91	223	0.549	5.17	12	2.02	126	1	1	1	1	0	2	0	1	0	0	0	0	0	0	1	0	1	0	1	49	36	28	60	29	0	0	1	1	0	0
5	0	1	74	23.03	0	179	1	0	1	72	144	82	8.43	165	3.6	5.65	30	1.54	100	0	1	1	1	0	1	0	1	0	0	1	0	0	0	1	1	1	0	1	55	30	30	55	28	0	0	1	0	0	0
7	1	1	49	25.71	1	153	1	0	1	82	146	92	10.02	168	16	5.79	47	2.64	80	1	1	1	1	0	1	0	0	0	0	0	0	0	0	1	0	0	0	0	59	34	28	43	30	0	1	0	0	0	0
14	1	0	74	20.55	0	121	0	0	1	72	120	76	4.06	86	3.479	5.47	45	2.52	54	1	1	1	1	0	1	0	1	0	0	0	0	0	0	1	0	2	0	1	52	27	30	50	31	0	1	0	0	0	0
15	0	1	74	20.2	1	127	1	1	1	89	138	90	9.2	156	16	6.39	33	2.25	83	0	1	1	1	0	1	0	0	0	0	0	0	0	0	1	0	2	0	1	50	27	32	45	28	0	1	0	0	0	0
6	1	1	23	37.98	1	159	1	0	1	76	114	70	17.03	295	5.776	5.03	105	3.55	99	1	1	1	1	0	1	0	0	0	0	0	0	0	0	0	0	0	0	1	43	31	31	46	28	0	1	0	0	0	0
34	1	0	72	23.94	0	115	0	0	1	101	104	67	10.41	169	9.793	6.7	31	2.52	41	0	1	1	1	0	3	0	0	0	1	0	0	1	0	1	0	0	0	0	54	33	30	49	29	0	0	0	1	0	0
7	1	1	52	30.0712	1	172	1	0	1	80	125	85	8.21	162	3.22	8.03	12.6	4.22	63	1	1	1	1	0	1	1	1	0	0	0	0	0	0	0	1	1	0	1	55	35	37	48	20	0	0	1	0	0	0
4	0	1	54	26.57	0	162	1	0	1	64	144	90	8.97	153	0.001	3.41	111	6.02	66	0	1	1	1	0	1	0	1	0	0	0	0	0	0	0	0	0	0	1	50	36	30	63	32	1	0	1	1	0	0
8	1	1	74	18.16	0	123	1	0	1	54	128	74	8.4	128	16	1.57	49	2.74	80	0	1	1	1	0	2	0	1	1	0	0	0	0	0	2	0	3	1	1	53	36	37	50	35	0	1	0	0	0	1
11	0	0	64	16	0	126	1	0	1	78	160	104	14.77	236	7.1	10.49	13	2.39	60	1	1	1	1	0	1	1	1	0	0	0	0	0	0	0	1	0	0	1	72	31	31	40	29	0	1	0	0	0	0
9	1	1	62	22.49	1	143	1	0	1	79	106	64	8.43	132	16	5.05	86	2.39	77	1	1	1	1	0	1	0	0	0	0	0	0	0	0	1	0	1	0	1	56	31	34	54	30	0	1	0	0	0	0
4	1	0	70	23.33	0	126	1	0	1	92	102	72	15.68	247	2.8	6.91	56	3.07	47	0	1	1	1	0	2	1	1	1	0	0	0	0	0	1	0	0	0	0	54	33	30	49	29	0	1	0	0	0	0
14	1	1	64	23.26	0	109	1	0	1	76	132	86	6.08	164	0.11	3.37	40	2.34	65	0	1	1	1	0	2	1	1	1	0	0	0	0	0	0	0	0	0	1	26	24	24	49	26	0	1	0	0	0	0
9	1	0	63	28.04	0	136	1	0	1	76	116	62	9.51	168	7.1	5.25	34	3.49	73	1	1	1	1	0	1	1	0	0	0	0	0	0	0	0	0	0	0	1	61	31	32	46	30	0	1	1	0	0	0
10	1	1	66	23.6	1	118	1	0	1	78	120	80	10.28	267	12.659	7.36	54	1.97	168	0	1	1	1	0	2	0	0	0	0	0	0	0	1	0	0	1	0	0	28	40	32	64	28	0	0	0	1	0	0
7	1	1	47	31.53	1	148	1	0	1	82	120	80	6.08	171	0.198	5.7	41	1.73	69	1	1	1	1	0	1	0	0	0	0	0	0	0	0	0	0	0	0	1	69	33	32	50	28	0	0	1	0	0	0
23	1	1	57	19.49	1	130	1	0	1	76	102	72	11.28	195	16	4.84	89	1.24	86	1	1	1	1	0	1	0	0	0	0	0	0	0	0	1	0	0	0	0	54	33	30	49	29	0	1	0	0	0	0
8	1	1	57	28.34	1	142	1	0	1	82	136	78	25.63	223	16	5.75	89	2.19	103	1	1	1	1	0	1	0	0	0	0	0	0	0	0	0	0	0	0	0	46	34	30	54	32	0	1	0	0	0	0
7	0	1	54	27.77	1	142	1	0	0	78	153	86	8.99	169	1.85	5.48	33	1.96	73	1	1	1	1	0	2	1	1	0	0	0	0	0	0	1	0	0	0	1	55	34	35	50	35	0	0	1	0	0	0
6	1	1	85	20.76	0	106	1	0	0	60	104	63	10.75	144	16	5.25	59	1.99	92	0	1	1	1	0	2	0	1	0	0	0	0	0	0	1	0	3	0	1	40	36	31	53	30	0	1	0	0	0	0
10	0	1	67	22.21	1	144	1	0	1	52	152	90	5.89	139	9.238	5.5	43	3.24	78	1	1	1	1	0	1	0	0	0	0	1	0	0	0	0	0	0	0	1	65	31	32	47	29	0	1	0	0	0	1
15	1	0	60	21.9289	0	115	1	0	0	54	98	60	10.8	187	64	21.52	62.5	2.81	132	1	1	1	1	0	1	1	1	0	0	0	0	0	0	1	0	1	0	1	43	34	30	43	18	0	1	0	0	0	1
3	1	1	77	23.4236	1	129	1	0	1	89	140	106	9.82	142	0.658	6.52	14.8	4.55	110	1	1	1	1	0	2	0	0	0	0	0	0	0	0	1	1	1	0	1	20	36	36	66	16	0	1	0	0	0	0
9	1	1	64	22.75	0	147	1	0	1	88	114	70	11.56	175	12.056	5.97	72	3.1	78	1	1	1	1	0	1	0	0	0	0	0	0	0	0	1	0	0	0	0	54	33	30	49	29	0	1	0	0	0	0
14	1	0	80	23.4236	0	118	1	0	1	40	136	78	8.81	190	8.84	6.02	41.6	2.34	75	1	1	1	1	0	1	0	1	0	0	0	0	0	0	0	0	0	0	1	48	34	34	45	20	0	0	1	0	0	1
10	1	0	70	21.48	1	106	1	0	1	68	174	82	4.99	249	16	11.15	66	3.11	65	1	1	1	1	0	1	1	1	0	0	0	0	0	0	1	2	1	0	1	67	37	30	55	27	0	1	0	0	0	0
5	0	0	74	20.89	0	111	1	0	1	90	128	70	12.52	167	16	6.44	36	3.25	148	0	1	1	1	0	2	1	1	0	0	0	0	0	1	1	0	0	0	0	54	33	30	49	29	0	1	0	0	0	0
25	0	0	74	22.0317	0	99	1	0	1	106	110	60	12.56	294	2.56	29.44	186.2	1.64	145	1	1	1	1	0	2	1	1	1	0	0	0	0	0	2	1	2	0	1	29	35	35	56	19	0	1	1	1	0	0
5	1	0	74	28.06	0	139	1	1	1	73	148	80	4.72	260	0.642	3.95	89	2.79	59	0	0	1	1	0	1	0	1	0	0	0	0	0	0	1	0	0	0	0	54	33	30	49	29	0	1	0	0	0	1
12	1	1	62	25.2	1	119	0	0	1	79	108	60	8.63	319	0.257	4.26	17	5.77	85	1	1	1	1	0	1	0	0	0	0	0	0	0	0	0	0	0	0	1	61	32	28	49	25	0	0	1	0	1	0
28	1	1	68	29.41	0	109	0	1	1	85	158	85	11.57	138	16	8.26	21	1.09	270	0	1	1	1	0	3	1	1	0	0	0	0	0	0	0	1	0	0	0	57	30	29	49	24	0	1	0	1	0	0
10	1	1	65	20.57	0	136	1	0	1	76	124	82	9.42	177	12.231	11.06	20	2.91	97	1	1	1	1	0	1	1	0	0	0	0	0	0	0	1	1	0	0	0	47	36	29	55	22	0	1	0	0	0	0
10	1	1	47	27.68	1	150	1	0	0	60	128	78	11.86	186	1.752	5.61	58	2.68	90	1	1	1	1	0	1	0	0	0	0	0	0	0	0	1	0	1	0	1	64	34	33	56	34	0	1	0	0	0	0
5	1	1	66	23.88	0	125	1	0	1	84	146	82	13.36	153	16	9.79	45	3.18	68	1	1	1	0	1	1	1	1	0	0	0	0	0	0	0	0	0	0	0	74	34	34	39	33	0	1	0	0	0	0
7	1	1	41	25.82	1	161	1	0	1	86	132	81	20.54	284	16	5.48	121	2.62	67	0	1	1	1	0	2	0	0	0	0	0	0	0	0	0	0	0	0	1	52	35	33	53	31	0	1	0	0	0	0
9	1	1	78	23.72	1	139	1	1	1	80	190	90	6.59	166	0.001	4.84	16	2.96	137	1	1	1	1	0	1	1	1	0	0	0	0	0	0	1	1	1	1	1	61	34	31	48	31	0	1	0	0	0	0
10	0	1	69	25.4028	0	134	1	1	1	88	160	104	6.93	202	0.627	5.07	16.6	2.66	76	0	1	1	1	0	1	0	1	0	0	0	0	0	0	1	1	1	0	1	63	38	35	55	17	0	1	0	0	0	0
5	1	0	79	20.89	0	103	0	0	0	88	170	100	10.75	226	2.332	6.7	7	3.5	222	0	1	1	1	0	2	0	1	1	0	0	0	0	0	1	0	0	0	0	54	33	30	49	29	0	0	0	0	0	0
9	1	1	60	24.09	0	135	1	0	1	105	115	77	11.4	158	16	6.8	79	2.88	79	1	1	1	1	0	1	0	0	0	0	0	0	0	0	1	0	0	0	0	54	33	30	49	29	0	1	1	0	0	0
8	1	1	83	24.4646	0	136	0	1	1	70	120	70	7.93	156	0.012	5.05	13.2	2.44	64	0	1	1	1	0	1	0	1	0	0	1	0	0	0	1	1	1	0	0	65	32	35	43	18	0	0	1	0	0	0
10	1	0	64	20.55	0	144	1	0	1	90	140	90	9.44	236	5.665	10.48	17	5.18	45	1	1	1	1	0	1	1	1	0	0	0	0	0	0	0	0	0	0	0	48	33	31	48	25	0	1	0	0	0	0
29	0	1	61	27.68	1	94	1	1	1	102	149	85	5.83	229	0.139	10.22	13	2.39	198	0	1	1	1	0	2	1	1	1	0	0	1	0	0	1	0	0	0	0	54	33	30	49	29	0	0	1	1	0	0
11	0	1	50	26.67	1	110	1	0	1	101	107	67	5.12	176	0.001	6	32	3.66	60	0	1	0	1	0	2	0	1	0	0	0	0	0	0	2	1	1	1	0	46	48	36	65	35	0	0	1	1	0	0
9	1	1	63	26.73	1	148	1	0	1	81	114	56	10.56	163	16	6.14	29	2.43	85	1	1	1	1	0	1	0	0	0	0	0	0	0	0	0	0	1	0	1	50	34	31	57	30	0	1	0	0	0	0
13	1	0	57	22.31	0	134	1	0	1	104	144	94	16.78	220	16	8.91	53	3.98	43	0	1	1	1	0	1	1	1	0	0	0	0	0	0	2	0	2	0	0	38	36	30	59	29	0	1	0	0	0	0
11	1	1	35	28.09	1	168	1	0	1	88	134	78	14.36	221	16	5.4	110	2.84	79	1	1	1	1	0	1	1	0	0	0	0	0	0	0	1	0	0	0	0	51	33	35	50	30	0	1	0	0	0	0
7	1	1	71	30.74	0	144	1	0	1	64	150	100	8.57	181	16	5.8	49	2.94	97	0	1	1	0	1	1	0	1	0	0	0	0	0	0	1	0	0	0	0	54	33	30	49	29	0	1	0	0	0	0
14	1	1	47	25.2363	1	165	1	0	1	105	120	70	16.47	322	5.46	7.74	86.1	4.38	74	1	1	1	1	0	1	0	0	0	0	0	0	0	0	1	0	0	0	1	43	36	32	49	17	0	1	0	0	0	0
9	0	0	70	19.72	0	114	1	1	1	62	120	61	8.15	236	3.952	16.13	19	2.11	39	0	1	1	1	0	1	1	1	0	0	0	0	0	0	1	0	0	0	0	54	33	30	49	29	0	1	0	0	0	0
8	0	1	81	20.94	1	114	1	1	0	62	162	74	5.59	198	0.789	5.51	26	2.5	165	0	1	1	0	1	2	0	1	0	0	1	0	0	0	1	0	0	1	0	65	35	27	43	24	0	1	1	0	0	0
11	0	1	63	23.94	1	113	1	0	0	60	133	77	7.75	157	2.344	6.8	17	1.54	124	0	1	1	1	0	1	1	0	0	0	0	0	0	0	0	0	1	0	1	67	33	29	42	28	0	0	0	0	0	0
3	1	1	57	19.03	1	131	0	0	0	56	74	46	11.56	229	11.357	4.73	65	2.61	117	0	1	1	1	0	1	0	0	0	0	0	0	0	0	1	0	0	0	0	54	33	30	49	29	0	0	0	0	1	1
7	0	0	79	22.22	0	82	1	0	1	80	134	80	7.2	196	1.876	4.07	7	2.5	82	0	1	0	1	0	1	1	1	1	0	0	0	0	0	1	0	0	0	0	54	33	30	49	29	0	1	0	0	0	0
12	1	0	65	23.4236	0	120	1	0	1	72	160	78	12.94	192	7.5	9.85	49.4	3.9	47	1	1	1	1	0	1	0	0	0	0	0	0	0	0	0	0	1	0	1	52	33	38	46	19	0	1	1	0	0	1
11	1	1	71	24.61	0	137	1	0	1	75	132	90	9.02	115	16	5.56	39	3.6	81	1	1	1	1	0	1	0	0	0	0	0	0	0	0	0	0	0	0	0	44	29	29	48	28	0	1	0	0	0	0
6	0	1	67	22.49	1	143	1	1	1	85	130	80	7.41	235	1.279	5.41	20	1.04	102	1	1	1	1	0	1	0	0	1	0	1	0	1	0	0	0	0	1	0	54	40	26	41	29	0	0	1	0	0	0
8	1	1	67	26.67	1	147	1	0	1	84	106	68	7.79	233	0.044	4.97	115	1.42	77	0	1	1	1	0	1	0	0	0	0	0	0	0	0	0	1	1	0	1	60	29	30	46	28	0	1	1	0	0	0
8	0	0	76	19.81	1	115	1	1	1	64	140	81	3.25	108	5.916	6.7	20	2.34	60	1	1	1	0	1	1	1	1	1	0	0	0	0	0	1	0	0	0	1	57	27	29	40	23	0	1	0	0	0	0
29	1	0	64	20.44	1	114	1	0	1	88	128	80	10.76	98	16	5.85	40	1.69	83	1	1	1	1	0	3	0	1	0	0	0	0	0	0	0	0	2	0	0	53	40	32	46	31	0	1	0	0	0	0
4	0	0	72	21.63	0	126	0	0	1	115	126	74	7.84	247	3.153	6.93	23	2.15	50	0	1	1	1	0	1	1	0	0	0	0	0	0	0	0	1	0	0	0	50	28	25	45	22	0	0	1	0	0	0
5	0	0	76	19.23	0	80	0	0	0	72	120	80	4.81	504	0.001	4.13	26	2.81	63	0	0	0	0	0	1	0	0	0	0	0	0	0	0	0	1	0	0	0	63	26	27	45	26	0	0	0	0	0	0
10	1	1	62	22.15	1	132	1	0	1	68	80	50	6.52	283	16	5.61	38	2.92	58	1	1	1	1	0	1	0	0	0	0	0	0	0	0	0	1	1	1	1	57	33	32	54	33	0	1	0	0	0	0
8	1	1	65	22.04	1	127	0	0	1	86	108	66	11.73	179	16	12.39	51	3.65	84	0	1	1	1	0	1	0	0	0	0	0	0	0	0	1	0	1	0	0	52	31	34	50	27	0	1	0	0	0	0
5	1	0	58	24.22	0	123	1	1	1	60	140	88	8.45	221	10.376	6.05	35	2.7	59	0	1	1	1	0	1	0	1	0	0	0	0	0	0	1	0	1	0	0	62	38	34	52	35	0	0	0	0	0	0
5	1	1	76	26.3	1	142	1	1	1	58	126	78	10.56	164	0.001	4.91	25	2.24	98	1	1	1	1	0	1	0	1	0	0	0	0	0	0	1	0	0	0	0	54	33	30	49	29	0	1	0	0	0	1
5	1	1	71	27.29	1	138	1	0	1	64	167	77	7.41	174	0.467	5.87	17	1.57	109	1	1	1	1	0	1	0	1	0	0	0	0	0	0	1	0	0	0	0	54	33	30	49	29	0	1	1	0	0	0
8	1	1	54	24.79	0	135	0	0	1	64	134	82	5.5	218	0.049	13.89	35	1.49	89	1	1	1	1	0	1	1	0	0	0	0	0	0	0	1	0	1	0	0	48	33	29	43	29	0	1	0	0	0	0
3	1	0	67	22.67	0	89	0	0	1	81	120	80	7.1	142	1.995	5.97	40	1.75	116	1	1	1	1	0	4	0	1	0	0	0	0	0	0	1	0	0	0	0	54	33	30	49	29	0	1	0	0	0	0
46	0	1	56	24.39	1	166	0	0	1	75	102	70	4.77	188	0.145	7.5	34	2.33	79	0	1	1	1	0	1	1	0	0	0	0	0	0	0	1	0	0	0	0	54	33	30	49	29	0	1	0	0	0	0
8	1	1	61	21.46	1	152	1	0	1	84	134	86	5.36	205	11.683	6.05	340	2.71	64	1	0	1	1	0	1	0	0	0	0	0	0	0	0	2	1	2	1	0	36	48	50	61	47	0	1	0	0	0	0
6	1	0	59	21.37	0	134	1	0	1	67	126	70	10.21	184	2.495	7.38	18	3.46	45	0	1	1	1	0	1	0	0	0	0	0	0	0	0	0	0	1	0	0	59	28	32	50	33	0	1	0	0	0	0
10	1	1	36	23.53	0	154	1	0	1	90	104	68	13.07	100	16	5.74	33	2.09	60	1	1	1	1	0	1	0	0	0	0	0	0	0	0	1	0	0	0	0	54	33	30	49	29	0	1	0	0	0	0
3	1	1	80	23.4236	0	119	1	0	1	80	120	70	5.3	145	1.08	5.11	87.8	3.57	81	0	1	1	1	0	4	0	1	1	1	0	0	0	0	1	0	1	0	1	20	35	35	49	19	0	1	0	0	0	0
9	0	1	56	23.46	1	129	1	0	1	66	108	63	6.06	137	0.929	4.87	25	1.28	91	1	1	1	1	0	1	0	0	0	0	0	0	1	0	2	1	1	1	0	30	37	32	68	33	0	1	0	0	0	0
8	0	0	64	22.5	0	143	1	0	1	60	106	54	9.62	299	2	16.34	21	1.98	57	0	1	1	1	0	1	1	1	0	0	0	0	0	0	1	0	0	0	0	54	33	30	49	29	0	1	0	0	0	0
6	1	1	76	23.255	1	117	0	1	0	70	120	70	6.37	158	0.014	4.53	11.4	2.74	87	0	1	1	1	0	1	0	0	0	0	0	0	0	0	1	0	1	0	1	63	30	36	42	17	0	1	0	0	0	0
11	1	0	60	26.1427	0	116	1	0	0	88	138	91	10.8	181	0.872	8.95	18.5	2.94	82	1	1	1	1	0	2	1	1	0	0	0	0	0	0	1	1	1	0	1	39	39	37	56	17	0	0	0	1	0	0
10	1	0	69	22.27	0	138	1	1	1	69	180	110	9.14	233	0.166	9.21	14	3.72	63	1	1	1	1	0	1	0	1	1	0	0	0	0	0	0	0	0	0	1	62	28	30	40	28	0	1	0	0	0	0
12	1	1	67	21.9713	1	130	1	0	0	50	170	90	10.54	207	4.9	13.69	41.6	2.46	76.8	1	1	1	1	0	1	1	1	0	0	0	0	0	0	1	0	0	0	1	63	25	32	46	17	0	1	0	0	0	1
13	1	1	67	23.31	1	156	1	0	1	58	124	70	17.36	184	16	6.71	73	2.1	79	1	1	1	1	0	1	0	1	0	0	0	0	0	0	0	0	0	0	1	63	32	32	54	33	0	1	0	0	0	1
26	1	1	63	26.99	1	116	1	0	1	83	130	78	8.2	269	8.879	4.01	22	1.9	75	0	1	1	0	0	2	0	0	0	0	0	0	0	0	2	0	1	1	0	42	39	40	60	37	0	1	0	1	0	0
4	1	1	45	26.22	0	164	1	0	1	74	150	90	7.66	242	1.341	4.64	39	3.26	114	0	1	1	1	0	1	0	1	0	0	0	0	0	0	0	0	0	0	0	61	32	34	32	33	0	1	0	0	0	0
7	1	1	41	25.69	1	152	1	0	1	74	114	66	11.54	177	16	7.73	73	2.27	32	1	1	1	1	0	1	1	0	0	0	0	0	0	0	1	0	1	0	1	58	37	33	58	35	0	1	0	0	0	0
6	0	1	68	23.94	0	122	0	1	1	96	179	106	8.24	182	1.495	5.83	22	2.97	86	0	0	0	0	0	2	0	1	1	0	0	0	0	0	1	0	0	0	0	54	33	30	49	29	0	0	0	0	1	0
13	1	1	56	23.6505	1	123	1	0	0	54	90	60	10.54	208.838	1.668	8.4	58	2.7	92	1	1	1	1	0	1	0	1	0	0	0	0	0	0	1	0	1	0	0	73	31	28	50	18	1	1	1	0	0	1
19	1	1	50	24.1561	1	125	1	0	1	79	170	125	15.85	208.838	2.515	8.4	50	3.7	92	1	1	1	1	0	1	0	0	0	0	1	0	0	0	1	0	1	0	0	47	35	30	47	16	1	1	1	1	0	0
9	1	1	55	24.9514	1	175	1	0	1	99	120	70	10.54	208.838	0.6346	8.4	39.14	3.56	92	1	1	1	1	0	3	1	0	0	0	0	0	0	0	2	1	2	1	0	42	42	37	58	32	0	1	0	0	0	0
7	1	0	61	23.2352	0	125	1	0	1	80	140	91	10.63	208.838	10	9.02	139	2.7	92	1	1	1	1	0	1	0	0	0	0	0	0	0	0	1	1	1	1	0	40	37	30	57	28	0	1	0	0	0	0
10	1	1	72	23.5814	1	125	0	0	1	102	90	60	10.54	225	2.49	9.81	39.14	2.7	92	1	1	1	1	0	1	1	0	0	0	0	0	0	0	1	1	1	1	0	44	42	34	60	30	0	1	0	0	0	0
11	0	0	56	30.82	0	136	1	0	1	79	120	70	8.8	208	13.311	5.76	32	4.07	50	1	1	1	1	0	1	1	1	0	0	0	0	0	0	0	0	1	0	1	63	36	32	49	33	0	1	0	0	0	0
9	1	0	76	15.82	0	104	1	0	1	88	104	90	12.09	177	16	6.25	86	0.09	93	0	1	1	1	0	1	0	1	0	0	0	0	0	0	1	1	1	0	0	46	34	30	44	26	0	1	0	0	0	0
12	1	1	79	25.9107	1	109	1	0	1	80	150	80	7.96	155	48	4.64	37.6	2.02	96	0	1	1	1	0	1	0	1	0	0	0	0	1	0	1	2	1	0	1	61	39	35	55	18	0	0	1	0	0	0
8	1	1	55	23.7059	0	125	0	0	0	92	100	60	11.87	225	1.715	8.27	46	2.7	92	1	1	1	1	0	1	0	0	0	0	0	0	0	0	1	0	1	1	0	59	33	30	52	28	1	1	1	0	0	0
11	1	1	71	24.01	1	133	0	0	1	88	98	59	4.98	131	6.824	5.01	55	1.93	95	1	1	1	1	0	1	0	0	0	0	0	0	0	0	1	0	1	0	0	39	33	30	50	30	0	0	1	0	0	0
7	1	1	66	23.6349	0	125	1	0	0	112	80	60	16.45	225	1.835	8.4	73	2.7	92	0	1	1	1	0	4	0	0	0	1	0	0	0	0	3	0	1	1	0	41	46	37	57	31	0	1	0	1	0	0
7	1	1	79	24.948	0	392	1	0	1	86	160	65	10.54	225	0.9604	6.03	39.14	2.7	92	1	1	1	0	0	1	0	1	0	0	0	0	0	0	2	1	1	0	0	50	37	30	61	23	0	1	0	1	0	0
6	1	1	47	23.3058	0	125	1	0	1	72	130	80	10.45	390	8.934	8.4	50	2.7	92	1	1	1	1	0	1	0	0	0	0	0	0	0	0	0	0	0	0	0	59	26	32	46	24	0	1	0	0	0	0
9	1	0	78	26.71	0	120	0	0	0	55	112	60	14.3	304	16	6.7	15	1.22	63	0	1	1	0	1	1	0	0	0	0	0	0	0	0	2	1	1	2	0	49	47	36	56	33	0	1	0	0	0	1
6	1	1	52	23.4304	0	125	1	0	1	76	120	80	11.38	225	1.006	8.4	53	2.7	92	1	1	1	1	0	1	0	0	0	0	0	0	0	0	0	0	0	0	0	63	27	28	24	23	0	1	0	0	0	0
7	0	0	62	23.83	0	121	1	1	1	66	122	66	5.02	201	4.923	4.63	24	1.54	105	0	1	1	0	1	2	0	0	0	0	0	1	0	0	1	0	0	0	0	54	33	30	49	29	0	0	1	1	0	0
13	1	1	75	21.83	1	120	1	0	0	60	110	64	7.25	266	7.763	4.71	20	1.37	99	1	1	1	1	1	1	0	1	1	0	0	0	0	0	1	0	0	0	0	54	33	30	49	29	0	1	1	0	0	0
5	1	1	47	24	1	173	1	0	1	73	131	72	8.15	147	0.553	7.19	36	2.28	63	0	1	1	1	0	1	1	0	0	0	0	0	0	0	1	0	0	0	0	54	33	30	49	29	0	1	1	0	0	0
7	1	0	71	23.4402	0	125	1	1	1	110	150	100	13.93	535	4.142	7.05	42	2.7	138.9	0	1	1	1	0	2	0	1	0	0	0	0	0	0	2	1	2	0	0	47	36	35	48	27	0	0	1	0	0	0
16	0	1	58	30.44	1	128	1	1	1	76	176	112	5.93	223	1.236	5.47	27	3.82	76	0	1	1	1	0	2	0	1	1	0	0	0	0	0	0	0	0	0	0	68	34	34	42	31	0	1	0	0	0	0
4	1	0	79	23.2663	0	125	1	0	1	84	140	100	10.54	225	3.105	7.77	78	3.73	92	0	1	1	0	0	2	0	1	0	0	0	0	0	0	1	1	0	0	0	37	23	28	50	20	0	1	0	0	0	0
12	1	0	73	24.8586	0	110	1	1	1	78	142	80	11.86	257	2.49	8.4	99	2.7	255	0	1	1	1	0	2	0	1	1	0	0	0	0	0	1	1	2	1	0	44	48	43	51	32	0	0	1	1	0	0
10	0	1	67	24.61	1	130	1	0	1	96	116	70	9.51	284	14.363	5.23	22	2.93	81	0	1	1	1	0	2	0	1	0	0	0	1	0	0	1	0	1	0	0	41	36	31	57	26	0	0	1	1	0	0
9	1	1	76	23.5542	0	125	1	0	1	95	120	70	14.5	225	50	14.43	78	3.67	92	1	1	1	1	0	1	0	0	0	0	0	0	0	0	1	0	0	0	0	60	26	33	46	24	0	1	1	0	0	0
14	0	0	85	22.48	1	115	1	1	1	72	152	72	5.97	229	16	4.15	24	2.11	95	0	1	1	0	1	1	0	1	0	0	0	1	0	0	1	0	0	0	0	54	33	30	49	29	0	0	0	0	0	0
5	1	1	53	23.45	1	135	1	0	0	52	120	70	5.59	261	7.1	4.27	89	2.56	83	0	1	1	1	0	1	0	0	0	0	0	0	0	0	0	0	0	0	1	71	30	30	46	31	0	0	0	0	0	1
14	0	1	74	25.2595	0	119	1	0	0	62	136	72	8.49	138	0.018	5.08	24.8	2.66	102	0	1	1	1	0	2	0	1	0	0	0	0	1	0	0	0	0	0	1	57	36	38	47	19	0	0	0	0	0	0
15	0	0	77	23.92	0	115	1	0	1	75	128	66	6.36	188	1.746	4.92	10	2.41	78	0	1	1	1	1	2	0	0	0	0	0	1	0	0	3	3	1	1	0	46	38	32	61	34	0	0	1	1	0	0
3	0	0	59	22.8255	0	125	0	0	1	70	140	90	11.16	225	2.49	8.4	39.14	2.7	92	0	1	1	0	0	1	0	0	0	0	0	0	0	0	1	0	1	0	0	45	24	29	40	22	0	1	0	0	0	0
7	0	1	70	24.22	0	138	1	0	1	90	136	88	10.16	229	14.62	7.12	33	3.6	93	1	1	1	0	1	1	1	1	0	0	0	0	0	0	1	0	1	0	0	59	31	32	46	27	0	1	1	0	0	0
19	0	0	64	23.1077	0	109	1	0	1	88	138	64	10.54	225	2.49	8.95	39.14	2.7	92	0	1	1	1	0	1	1	0	0	0	0	0	0	0	0	0	0	0	0	62	25	32	37	23	0	0	0	0	0	0
6	1	0	62	22.22	0	112	1	0	0	96	131	78	6.41	236	14.441	6.5	20	1.63	53	0	1	1	1	0	1	0	0	0	0	0	0	0	0	1	0	0	0	0	60	31	33	53	34	0	0	1	1	0	0
8	1	1	60	20.62	1	137	1	0	1	80	126	76	7.92	173	14.716	7.23	62	4.09	48	1	1	1	0	1	1	0	0	0	0	0	0	0	0	1	0	1	0	0	60	32	27	51	25	0	1	0	0	0	0
7	1	0	84	27.89	0	114	1	0	1	66	152	66	8.37	171	16	10.53	31	3.64	63	0	1	1	0	1	1	1	1	0	0	0	0	0	0	0	0	1	0	0	43	31	26	40	23	0	0	0	0	0	0
10	1	0	59	19.78	0	95	1	0	1	88	118	74	5.85	423	0.613	4.37	31	6.19	48	1	1	1	1	1	2	0	1	0	0	0	0	0	0	1	0	0	0	0	54	33	30	49	29	0	1	0	0	0	0
9	1	1	46	24.927	1	156	1	0	0	87	119	77	13.87	257	13.408	8.4	39.14	2.87	92	1	1	1	0	0	1	0	0	0	0	0	0	0	0	1	0	1	0	0	55	32	27	52	23	1	1	0	0	0	0
4	1	1	42	23.8185	0	125	1	0	0	56	110	70	15.17	225	1.101	7.2	39.14	4.52	92	0	1	1	0	0	1	0	0	0	0	0	0	0	0	1	0	1	1	0	57	30	33	60	29	0	1	1	0	0	1
8	1	0	64	23.2732	0	125	1	0	1	110	150	110	13.9	225	0.4348	10.96	39.14	4.63	92	1	1	1	0	0	1	0	0	0	0	0	0	0	0	1	1	1	0	0	63	36	27	42	28	0	1	0	0	0	0
12	1	0	51	26.12	0	91	1	0	1	104	124	94	7.82	295	0.056	5.55	9	2.91	63	0	1	1	1	0	1	0	1	0	0	0	0	0	0	1	1	1	0	0	19	36	28	54	24	0	1	0	1	0	0
5	1	1	62	23.8816	1	125	1	0	1	100	215	130	17.77	225	7.506	11.04	99	2.7	92	1	1	1	1	0	2	1	1	0	0	0	0	0	0	0	0	1	0	0	40	23	22	45	23	0	1	0	0	0	0
11	1	1	73	24.1966	0	125	1	0	1	88	150	90	10.54	225	0.2556	6.82	39.14	3.12	92	0	1	1	1	0	3	0	0	0	1	0	0	1	0	2	1	1	0	0	34	43	31	63	32	0	0	1	1	0	0
3	0	0	50	24.3624	0	125	1	1	1	70	158	90	10.54	225	2.49	8.4	39.14	2.7	92	1	1	1	0	0	1	0	1	0	0	0	0	0	0	0	0	0	0	1	60	25	30	45	25	0	1	1	1	0	0
11	1	1	65	23.88	1	130	0	0	0	61	124	74	10.47	225	14.514	5.12	37	2.14	71	0	1	1	1	1	1	0	0	0	0	0	0	0	0	1	0	0	0	0	54	33	30	49	29	0	1	0	0	1	0
14	0	1	56	31.8	0	132	1	1	1	70	140	80	4.86	169	0.043	5.43	26	1.81	84	1	1	1	1	0	1	0	1	0	0	0	0	1	0	1	0	1	1	1	62	33	33	48	28	0	1	0	0	0	0
10	1	0	82	18.61	0	95	1	0	0	66	109	65	5.66	161	16	6.66	47	3.88	93	0	1	1	0	1	2	0	0	0	0	0	0	0	0	1	0	1	0	0	50	27	30	47	21	0	1	0	0	0	0
7	1	1	58	24.7139	1	125	1	0	0	76	150	90	10.54	225	1.002	10.96	41	2.7	92	1	1	1	1	0	1	0	0	0	0	0	0	0	0	1	1	1	0	0	50	32	33	47	31	0	1	0	0	0	0
9	1	1	74	23.2211	1	125	1	0	0	64	104	68	10.54	225	1.289	6.56	39.14	2.7	146	1	1	1	1	0	1	0	0	0	0	0	0	1	0	1	1	1	1	0	50	35	31	55	29	0	1	0	0	0	0
10	1	1	62	26.0262	1	150	1	1	1	99	190	100	13.25	214	7.17	7.08	105.8	2.53	67.5	1	1	1	1	0	2	0	1	0	0	0	0	0	0	1	0	1	0	1	52	30	35	42	20	0	1	0	0	0	0
4	1	1	49	23.8466	1	125	0	0	0	62	119	86	10.54	225	10	8.4	123.3	3.63	92	1	1	1	1	0	1	0	0	0	0	0	0	0	0	1	0	0	0	1	60	32	30	52	28	0	1	0	0	0	0
6	0	1	44	25.13	1	156	1	1	1	70	160	100	8.57	263	0.273	5.06	81	2.58	79	0	1	1	1	0	1	1	1	0	0	0	0	0	0	1	0	0	0	0	54	33	30	49	29	0	1	0	0	0	0
9	1	0	78	19.2234	0	113	1	0	1	112	174	82	5.93	242	4.57	4.22	14	1.95	92	0	1	1	1	0	3	0	0	0	0	0	0	0	0	0	1	1	0	1	40	40	30	51	14	0	0	1	0	0	0
8	1	1	40	22.77	1	129	1	0	1	55	110	72	6.76	240	1.919	4.55	110	3.83	84	1	1	1	1	0	1	1	1	0	0	0	0	0	0	0	0	0	1	0	58	23	29	51	28	0	1	0	0	0	1
12	1	1	70	24.286	0	125	1	0	1	96	150	80	10.54	225	1.218	8.29	47	2.7	92	1	1	1	0	0	1	0	1	0	0	0	0	0	0	1	1	1	1	0	54	43	35	52	34	0	1	0	0	0	0
4	1	1	81	23.6065	0	98	0	0	1	52	126	60	3.46	225	0.6458	8.4	39.14	2.7	92	1	1	1	1	0	1	0	0	0	1	0	0	0	0	1	1	0	0	0	58	41	31	46	30	0	1	0	1	0	1
7	1	1	57	26.67	1	144	1	0	1	74	128	88	4.95	169	2.6	5.14	60	2.27	104	1	1	1	1	0	1	1	1	0	0	0	0	0	0	1	0	1	0	0	60	27	35	51	35	0	1	0	0	0	0
11	1	1	66	22.86	1	121	1	0	0	93	103	63	8.76	211	14.318	11.21	25	4.08	118	0	1	1	1	0	2	1	0	0	0	0	0	0	0	1	1	1	0	0	60	33	31	48	29	0	1	0	0	0	0
5	1	1	81	21.45	0	123	0	0	1	73	150	75	4.74	128	0.435	5.83	18	2.08	135	0	1	1	1	0	2	1	1	1	0	0	0	0	0	0	0	0	0	1	67	33	27	45	29	0	0	1	0	0	0
8	1	1	58	26.3676	1	383	1	0	1	70	130	80	12.52	225	8.195	10.24	197	2.7	92	0	1	1	1	0	1	0	1	1	0	0	0	0	0	1	0	0	0	1	55	43	33	55	33	0	1	1	1	0	0
18	1	1	72	27.14	0	136	1	0	1	62	107	66	13.02	203	2.373	10.5	94	2.71	77	1	1	1	0	1	1	1	1	0	0	1	0	0	0	0	0	0	1	0	44	36	34	49	31	0	1	1	0	0	0
9	1	0	65	23.9499	0	108	1	1	1	88	130	80	10.42	138	2.49	7.3	39.14	2.7	92	1	1	1	1	0	1	1	1	0	0	0	0	0	0	1	1	1	1	1	58	31	34	48	33	1	1	0	0	0	0
13	1	1	66	25.39	0	125	1	1	0	68	94	74	9.13	120	16	7.33	80	1.85	104	0	1	1	1	0	2	0	1	0	0	0	0	1	0	0	0	0	0	0	52	24	28	50	25	0	1	0	0	0	0
10	1	1	52	24.22	0	120	1	0	1	64	138	80	5.62	314	7.484	6.23	96	1.82	100	0	1	1	1	1	1	1	1	0	0	0	0	0	0	0	0	0	0	0	71	35	23	46	28	0	1	0	0	0	0
7	1	1	81	24.4793	0	125	0	0	1	103	115	69	10.54	225	0.3819	8.4	39.14	2.7	92	0	1	1	1	0	1	0	0	0	0	0	0	0	0	2	1	2	1	0	48	56	46	60	41	0	1	0	1	0	0
5	0	1	55	24.0316	0	125	0	0	1	78	100	70	10.54	225	4.947	8.4	39.14	2.7	92	1	1	1	0	0	1	0	0	0	0	0	0	0	0	1	0	1	0	0	60	37	37	52	35	1	0	0	0	0	0
6	1	1	58	24.4533	1	125	1	0	1	84	104	62	10.54	225	2.49	8.4	70	2.7	92	1	1	1	1	0	1	0	0	0	0	0	0	0	0	1	0	0	0	1	60	32	30	50	30	0	1	0	0	0	0
10	1	1	70	28.51	0	139	1	1	1	80	156	93	5.44	113	3.904	6.31	21	2.02	69	1	1	1	1	0	1	1	1	0	0	0	0	0	0	0	1	0	0	0	57	27	33	54	31	0	1	0	0	0	0
8	1	1	60	24.0375	1	125	1	1	1	59	138	70	10.54	225	0.2565	8.4	39.14	2.7	92	1	1	1	1	0	1	0	1	0	0	0	0	0	0	1	1	1	0	0	52	35	36	50	30	0	1	1	0	0	1
5	1	1	55	24.9903	1	125	1	0	1	70	154	60	10.54	225	5.334	3.41	64	2.7	92	1	1	1	1	0	1	0	0	0	0	0	0	0	0	1	1	1	1	1	55	36	35	46	34	0	1	1	0	0	0
11	1	0	75	21.33	0	115	1	0	1	78	128	88	9.48	160	5.142	5.92	84	3.04	58	0	1	1	1	0	1	0	1	0	0	0	0	0	0	2	0	0	0	0	46	33	26	47	25	0	1	0	0	0	0
11	0	1	81	20.93	0	128	1	0	1	76	140	70	6.59	255	1.365	5.14	12	2.48	77	1	1	1	1	0	1	0	0	0	0	0	0	1	0	1	0	1	1	0	66	31	33	49	30	0	1	0	0	0	0
21	1	1	64	20.76	0	130	1	0	1	102	104	72	20.41	210	16	4.26	85	1.5	102	0	1	1	1	0	3	0	1	0	0	0	0	0	1	0	1	1	0	0	42	28	29	50	27	0	0	1	0	0	0
4	1	0	64	23.94	0	99	1	0	1	93	137	84	9.02	268	7.443	8.39	58	2.61	116	0	1	1	0	1	2	0	1	0	0	0	0	0	0	1	0	0	0	0	54	33	30	49	29	0	1	1	1	0	0
11	1	1	74	22.4323	0	98	0	0	0	70	140	80	6.56	69	8.38	5.67	32.8	1.49	73.9	1	1	1	0	1	3	0	1	0	0	0	0	0	0	1	0	1	0	1	51	35	35	49	19	0	1	0	0	0	0
33	0	1	59	26.93	1	157	1	1	0	69	142	96	8.15	270	1.643	5.23	30	2.87	114	0	1	1	1	0	1	0	1	1	1	0	0	0	0	0	0	1	0	1	73	30	31	46	30	0	1	0	0	0	0
3	1	0	79	18.97	0	124	1	0	1	92	150	84	13.89	250	16	7.9	36	3.61	41	1	1	1	0	1	1	0	1	0	0	0	0	0	1	1	0	0	0	0	54	33	30	49	29	0	1	0	0	0	0
9	1	0	75	22.22	0	150	0	0	0	79	95	62	15.27	170	16	6.23	83	2.12	77	0	1	1	1	0	3	0	0	1	0	0	0	1	0	0	0	2	0	0	46	33	32	54	27	0	1	0	0	0	0
3	1	0	76	23.4236	0	108	1	0	1	84	152	72	13.44	412	13	8.25	24.2	4.12	166	0	1	1	1	0	1	0	1	0	0	0	0	0	0	2	1	2	0	1	23	40	35	52	20	0	1	0	0	0	0
12	1	1	85	30.4688	1	123	1	0	1	65	160	80	12.29	206	0.118	7.51	55.5	3.11	122	1	1	1	1	0	3	0	1	1	0	0	0	0	0	0	1	0	0	1	47	45	37	60	18	0	0	1	0	0	0
3	1	0	75	17.26	1	119	1	0	0	84	118	70	11.33	215	13.198	6.25	54	1.95	54	0	1	1	1	0	4	0	0	0	1	0	0	0	0	1	0	0	0	0	54	33	30	49	29	0	1	0	0	0	0
13	1	1	65	24.2764	1	138	1	0	1	78	140	60	17.66	194	0.00755	8.4	39.14	2.7	92	1	1	1	1	0	1	0	0	0	0	0	0	0	0	0	0	0	1	1	60	31	35	42	37	0	0	1	0	0	0
4	0	0	75	24.73	0	131	1	0	0	60	136	72	12.99	131	6.037	21.15	66	2.85	86	0	1	1	0	1	2	1	1	1	0	0	0	0	0	1	0	0	0	0	54	33	30	49	29	0	1	0	0	0	0
8	1	1	70	22.31	1	94	1	0	0	48	128	68	12.7	210	16	5.81	43	2.57	132	0	1	1	0	1	2	0	0	0	0	0	0	0	1	1	1	1	0	1	77	33	31	44	31	0	1	0	0	0	1
29	1	1	83	23.7954	1	141	1	0	1	75	135	70	9.82	134	1.15	5.1	20.8	1.98	108	1	1	1	1	0	2	1	1	1	0	0	0	0	1	0	0	1	0	1	42	34	37	50	17	0	1	0	0	0	0
5	1	1	59	23.9386	1	141	1	0	1	78	100	60	5.55	186	0.8085	8.4	39.14	2.7	92	1	1	1	1	0	1	0	0	0	0	0	0	0	0	1	0	1	0	1	55	31	30	50	28	0	1	0	0	0	0
15	1	0	59	23.6484	0	132	1	0	1	82	140	90	12.81	247	1.024	8.4	123	2.99	56.6	1	1	1	1	0	1	0	1	0	0	0	0	0	0	1	0	1	0	1	57	33	35	47	30	0	1	1	1	0	0
11	1	0	78	23.3423	0	106	1	0	1	70	130	70	9.43	387	1.059	8.4	39.14	2.7	92	0	1	1	1	0	1	0	0	0	0	0	0	0	0	1	0	1	0	1	43	45	34	55	33	0	1	1	0	0	0
4	1	1	76	23.4236	0	123	1	0	0	100	120	80	8.46	113	1.74	8.46	55.9	2.49	75	0	1	1	1	0	4	1	0	1	0	0	0	0	0	1	0	1	0	1	51	35	35	49	19	0	1	0	1	0	0
5	1	1	68	24.8895	0	132	1	0	1	86	110	70	5.58	397	1.196	8.46	39.14	2.7	92	1	1	1	1	0	1	1	1	0	0	0	0	0	0	2	0	0	0	1	60	41	32	46	31	1	1	0	0	0	0
8	0	0	80	19.15	1	104	1	0	0	66	106	68	5.8	191	7.834	4.85	20	2.85	68	0	1	1	1	0	1	0	1	0	0	0	0	0	0	2	1	0	0	0	61	35	24	45	24	0	1	0	0	0	0
7	0	1	70	26.3	1	108	0	0	0	65	96	78	8.53	103	16	6.34	73	1.63	80	0	1	1	1	0	2	0	0	0	0	0	0	0	0	1	0	3	0	1	65	27	46	42	36	0	1	0	0	0	0
23	0	1	32	27.76	1	134	0	0	1	66	66	48	13.77	221	16	6.38	147	4.61	114	1	1	1	1	1	1	0	0	0	1	0	0	0	0	1	0	0	0	0	39	37	29	64	29	0	1	1	1	0	0
11	1	1	60	22.7156	0	129	0	0	1	60	90	60	11.64	180	2.49	6.48	30	3.38	64.5	1	1	1	1	0	1	0	0	0	0	0	0	0	0	0	0	1	1	0	63	30	34	50	23	0	1	0	0	0	0
8	1	1	44	24.4657	1	152	1	0	1	80	120	90	10.69	176	6.676	8.4	39.14	2.7	92	1	1	1	1	0	1	0	0	0	0	0	0	0	0	1	1	1	0	1	58	33	26	48	25	1	1	0	0	0	0
9	1	1	66	23.9567	0	101	1	0	1	76	128	79	9.86	160	8.937	8.4	34	2.7	170.2	0	1	1	1	0	1	1	1	1	0	0	0	0	0	1	0	0	0	1	45	30	33	46	33	0	1	1	0	0	0
11	1	0	66	27.06	0	127	1	0	1	96	168	100	18.73	146	13.88	7.6	69	3.31	69	0	1	0	1	0	2	0	1	0	0	0	0	0	0	0	0	1	0	0	42	30	29	46	27	0	1	0	0	0	0
10	1	0	63	22.7031	0	93	1	0	1	75	140	80	9.89	195	2.49	5.63	17	2.93	47.6	0	1	1	1	0	3	0	0	0	0	0	0	0	0	1	1	1	0	0	58	30	28	47	26	0	0	1	1	0	0
14	0	1	61	25.61	1	145	1	0	0	60	120	80	11.14	310	5.729	7.32	46	2.77	86	1	1	1	1	0	1	1	1	0	0	0	0	0	0	1	0	1	0	1	77	34	34	41	31	0	1	0	0	0	0
11	0	0	52	23.44	0	108	0	0	1	80	95	68	9.34	171	6.243	4.96	83	1.09	108	0	1	1	1	0	2	1	1	0	0	1	1	0	1	3	1	3	1	0	32	37	36	60	35	0	1	0	0	0	0
14	1	1	80	21.48	1	152	1	0	1	96	110	82	5.33	252	0.312	4.41	31	2.66	106	1	1	1	1	0	1	0	0	0	0	0	0	1	0	1	1	1	1	0	46	40	37	61	33	0	1	0	0	0	0
7	0	0	67	22.71	1	143	1	0	1	62	152	84	8.67	207	10.517	5.3	27	3.2	56	0	1	1	1	0	1	1	1	0	0	0	0	0	0	0	0	0	0	0	63	30	30	43	29	0	1	0	0	0	0
10	1	1	60	23.1092	0	126	0	0	0	60	100	60	5.95	137	3.75	5.39	22	2.75	92	1	1	1	1	0	1	0	0	0	0	0	0	0	0	1	0	1	0	0	58	30	34	48	33	0	1	0	0	0	0
9	1	1	60	26.22	1	151	1	0	1	84	98	78	6.04	129	9.427	5.23	65	3.73	70	0	1	1	1	0	2	0	0	0	0	0	0	0	0	1	1	1	0	0	35	32	27	56	25	0	1	0	0	0	0
6	1	1	60	24.6044	0	152	1	0	1	84	110	60	8.66	126	9.747	8.4	39.14	2.7	92	1	1	1	0	0	1	0	0	0	0	0	0	0	0	1	1	1	1	1	52	35	36	53	35	0	1	0	0	0	0
12	1	1	51	26.13	1	136	1	0	1	76	154	96	5.89	218	3.748	9.84	40	2.4	65	0	1	1	0	1	1	1	1	0	0	0	0	0	0	0	0	0	0	1	66	34	32	48	31	0	1	0	0	0	0
11	1	1	77	25.95	1	146	1	0	1	77	117	60	7.84	153	15.336	4.44	49	2.44	102	1	1	1	1	0	2	0	0	0	0	0	0	0	0	0	0	1	0	0	56	33	33	44	28	0	1	0	0	0	0
4	1	0	82	22.8336	0	117	1	0	0	60	130	60	12.2	146	0.7207	4.58	74	2.6	79.2	0	1	1	1	0	2	0	0	0	0	0	0	0	0	3	1	1	1	0	34	40	38	59	36	0	0	1	1	0	0
13	1	1	60	21.88	1	149	1	0	1	75	140	78	8.57	115	16	11.02	31	4.08	72	1	1	1	1	0	1	0	0	0	0	0	0	0	0	0	1	1	0	1	56	25	31	41	27	0	1	0	0	0	0
8	1	0	83	21.78	0	119	1	0	1	75	96	63	10.05	185	15.721	6.78	68	2.99	65	0	1	1	1	0	1	0	0	0	0	0	0	0	0	0	1	0	0	0	52	22	24	40	21	0	1	0	0	0	0
6	0	1	66	27.04	1	135	1	0	1	83	140	80	8.03	120	1.861	6.4	20	1.08	81	0	1	1	1	0	1	0	1	0	0	0	0	0	0	1	0	0	0	0	54	33	30	49	29	0	0	1	1	0	0
8	1	1	60	21.83	1	140	0	0	1	82	105	70	8.99	397	0.51	4.98	32	2.48	107	0	1	1	1	0	1	0	1	0	0	0	0	0	0	1	1	1	0	0	51	35	29	56	28	0	1	0	0	0	0
8	0	1	65	23.71	1	144	1	0	1	76	150	94	7.91	253	1.006	4.42	20	2.98	94	1	1	1	1	1	1	0	0	0	0	0	0	0	0	1	0	0	0	0	54	33	30	49	29	0	1	0	0	0	0
22	0	0	86	23.94	0	140	1	1	0	83	186	100	14.3	194	16	8.04	53	2.91	101	0	1	1	1	0	2	0	1	0	0	0	0	0	0	1	0	0	0	0	54	33	30	49	29	0	0	0	0	0	0
8	0	1	69	27.04	1	144	1	1	0	83	158	90	7.97	185	0.897	6.96	18	2.35	93	1	1	1	1	0	1	1	1	0	0	0	0	0	0	0	0	1	0	1	57	36	30	53	30	0	1	0	0	0	0
15	1	1	60	24.1672	1	136	1	0	1	86	170	90	7.82	269	0.7463	5.69	29	2.1	87	1	1	1	0	0	1	0	1	0	0	0	0	0	0	1	1	1	0	1	67	29	28	43	28	1	1	1	1	0	0
12	1	1	67	23.7713	1	145	1	0	1	77	130	60	7.29	234	2.8	7.06	64	4.4	56.9	1	1	1	0	0	1	0	0	0	0	0	0	0	0	1	1	0	0	1	50	30	30	47	28	0	1	0	0	0	0
27	1	1	51	26.78	0	145	1	0	0	84	120	80	8.26	164	16	11.1	38	2.85	60	1	1	1	1	0	4	1	0	0	0	0	0	0	0	0	0	0	0	1	61	30	31	48	28	0	0	1	0	0	0
19	1	1	79	24.977	1	130	1	0	1	90	128	92	8.69	96	3.62	5.91	24.2	1.78	59	1	1	1	1	0	2	0	0	0	0	0	0	0	0	2	1	3	0	1	35	35	35	54	19	0	1	1	0	0	0
8	1	1	83	22.3646	1	132	1	0	1	72	100	60	5.56	165	0.4342	5.21	10	2.24	82.3	0	1	1	1	0	1	0	0	0	0	0	0	1	0	0	0	0	0	0	13	24	31	56	24	0	1	0	0	0	0
9	1	1	50	26.6728	1	184	1	1	1	100	145	103	7.58	166	1.03	13.35	161.4	2.02	75	1	1	1	1	0	2	1	1	0	0	0	0	0	0	1	0	0	0	1	63	31	31	45	20	0	1	1	0	0	0
18	1	1	83	23.3027	0	122	1	0	1	88	130	80	12.97	175	10	8.24	138	3.23	80	1	1	1	1	0	2	0	0	0	0	0	0	0	0	1	0	1	0	0	44	35	29	47	28	1	1	0	0	0	0
9	1	0	56	23.5708	0	123	1	0	1	70	120	80	14.2	211	2.038	7	29	2.89	92	1	1	1	1	0	1	0	0	0	0	0	0	0	0	1	1	1	0	0	42	35	32	55	30	0	1	1	0	0	0
7	0	1	47	23.58	0	140	1	0	0	50	110	80	12.88	246	16	5.21	27	2.76	83	0	1	1	1	0	1	0	1	0	0	0	0	0	0	0	0	0	0	0	71	31	31	47	30	0	1	1	0	0	1
8	0	0	67	21.44	0	138	1	1	1	71	134	80	8.79	302	16	5.84	29	3.21	94	1	1	1	1	0	1	0	1	0	0	0	0	0	0	1	0	0	0	0	54	33	30	49	29	0	1	0	0	0	0
10	1	1	59	25.12	1	129	1	1	1	88	128	78	13.53	298	16	7.9	109	3.33	75	1	1	1	0	1	1	0	1	0	0	0	0	0	0	0	0	0	1	1	54	24	33	50	34	0	1	0	0	0	0
5	0	1	76	23.6935	0	122	1	0	1	90	150	90	5.99	183	2.119	5.99	26	3.73	116	0	1	1	0	0	1	0	1	0	0	0	0	1	0	1	1	1	1	0	60	30	38	50	26	0	1	1	0	0	0
7	1	1	60	28.77	1	142	1	0	1	65	120	78	13.37	168	16	5.13	53	2.27	95	0	1	1	1	0	2	0	0	1	0	0	0	0	0	1	0	0	0	0	65	34	32	49	29	0	1	0	0	0	0
6	1	0	70	22.4288	0	114	1	0	1	81	100	60	12.48	558	0.5235	6.98	19	1.69	48.9	1	1	1	1	0	1	0	0	0	0	0	0	0	0	1	0	1	0	0	55	28	32	46	28	0	1	0	0	0	0
10	1	1	59	25.33	1	124	1	0	1	82	114	68	7.34	272	0.05	4.31	38	1.7	91	0	1	1	1	0	1	0	0	0	0	0	0	0	0	1	0	0	0	0	54	33	30	49	29	1	1	0	0	0	0
8	1	1	78	23.7391	1	126	1	0	1	88	140	80	8.96	140	0.5218	8.4	31	2.72	106	0	1	1	1	0	1	1	1	0	0	0	0	0	0	1	1	0	0	0	40	28	29	47	26	0	0	1	1	0	0
18	1	1	67	23.7954	1	126	1	0	1	85	150	80	15.7	138	0.236	6.58	29.7	2.68	125.3	1	1	1	1	0	2	1	1	0	0	0	0	0	0	1	1	1	0	1	50	33	36	55	19	0	1	0	0	0	0
3	0	0	59	22.39	0	86	0	0	0	52	110	50	3.23	171	0.266	5.02	111	2.58	188	0	0	1	1	0	4	0	1	0	0	1	0	0	1	1	1	1	1	0	66	33	27	48	25	1	1	0	0	0	1
10	1	0	65	22.9398	0	122	1	0	1	65	160	85	7.04	157	0.522	9.23	36.8	0.49	73.8	1	1	1	1	0	1	1	1	1	0	0	0	0	0	1	1	1	0	1	45	36	35	57	18	0	1	1	0	0	0
15	1	0	76	22.3129	0	125	1	0	1	70	94	61	12.28	152	0.2512	5.79	59	4.51	65	1	1	1	1	0	1	0	0	0	0	0	0	0	0	1	1	1	1	1	52	30	24	41	25	1	1	0	0	0	0
7	1	0	58	22.8685	0	103	1	0	1	75	130	100	18.74	310	10	7.94	53	2.19	69.8	1	1	1	1	0	1	0	1	0	0	0	0	0	0	1	0	1	0	0	48	29	27	42	28	1	1	0	0	0	0
9	1	1	47	26.0084	0	161	1	0	0	70	120	80	13.33	199	1.34	7.56	63	4.73	104.1	1	1	1	0	0	1	0	0	0	0	0	0	0	0	1	0	0	0	1	53	30	27	45	29	0	1	1	0	0	0
8	0	1	61	25.27	1	152	1	1	0	70	180	110	7.46	161	0.28	5.75	34	3.7	76	1	1	1	1	0	1	0	1	0	0	0	0	0	0	0	0	0	1	0	62	34	33	46	30	0	1	0	0	0	0
9	1	1	44	28.73	1	145	0	0	1	88	99	71	13.3	185	16	4.54	120	3.21	75	1	1	1	1	0	1	0	0	0	0	0	0	0	0	1	0	1	0	0	52	30	30	55	30	0	1	0	0	0	0
6	0	1	65	24.61	1	125	1	0	1	76	118	64	18.6	192	1.916	7.11	72	2.28	74	0	1	1	0	1	1	1	1	0	0	0	0	0	0	1	1	1	0	1	69	26	30	41	32	0	1	0	0	0	0
5	1	1	71	23.3664	1	135	1	0	1	100	120	90	9.24	175	2.911	5.49	52	4.2	92	0	1	1	1	0	1	0	0	0	0	0	0	0	0	1	1	1	0	0	63	32	26	49	27	0	0	0	0	0	0
9	1	0	73	22.3906	0	99	0	0	1	60	90	68	6.26	189	10	6.61	31	1.56	92	1	1	1	0	0	1	0	0	0	0	0	0	0	0	0	2	2	1	1	71	33	71	39	40	0	1	0	0	0	0
4	0	1	85	20.25	1	128	1	0	1	64	124	67	4.97	195	0.003	4.66	8	1.15	133	0	1	0	1	0	1	0	1	0	0	0	1	1	0	1	1	1	0	0	50	33	30	53	30	0	0	0	1	0	0
3	1	1	53	24.0644	0	113	1	0	1	70	90	60	11.62	239	1.033	7.97	61	2.79	71	0	1	1	1	0	1	0	0	0	0	0	0	0	0	2	0	0	0	0	70	32	35	57	24	0	0	1	1	0	0
14	1	1	45	25.8052	1	158	1	0	1	99	142	98	11.95	208	2.49	8.4	329	4.05	83	1	1	1	1	0	2	1	1	0	0	0	0	0	0	2	0	1	0	1	34	50	41	66	40	1	1	1	0	0	0
9	1	1	59	24.2215	1	137	1	1	1	87	140	70	11.22	246	0.072	8.07	141.9	3.38	85	1	1	1	1	0	2	1	1	1	0	0	0	0	0	1	0	1	0	1	31	35	35	44	19	0	1	0	0	0	0
10	1	1	79	24.1633	1	150	1	1	1	74	150	90	8.52	85	0.01	12.04	120.4	1.54	78	1	1	1	1	0	3	1	1	0	0	0	0	0	0	2	0	0	0	1	41	36	33	55	16	0	1	0	0	0	0
7	1	1	44	21.3068	1	148	1	0	1	70	154	100	9.12	247	2.63	5.22	17.9	4.04	91	0	1	1	1	0	1	0	0	0	0	0	0	0	0	0	0	0	0	0	68	33	35	41	19	0	1	0	0	0	0
13	0	1	68	32.84	1	93	1	1	1	102	145	70	15.05	540	0.335	7.14	29	2.66	60	0	1	1	1	0	1	0	1	0	0	0	0	1	0	1	0	0	0	0	54	33	30	49	29	0	1	0	0	0	0
8	1	1	59	23.3067	1	143	0	0	1	98	120	87	11.21	236	0.926	5.04	33.6	3.3	69.9	0	1	1	1	0	2	0	1	0	0	0	0	0	0	0	0	1	0	1	30	35	35	50	19	0	1	1	1	0	0
11	0	1	60	26.86	1	126	1	0	1	73	130	80	9.84	204	0.361	8.12	21	3.28	81	1	1	1	1	0	1	1	1	0	0	0	0	0	0	0	0	0	0	0	46	35	33	59	30	0	1	0	0	0	0
11	1	0	46	24.97	0	97	1	0	0	83	121	63	13.36	903	1.256	7.37	12	3.02	169	1	1	1	1	0	1	1	0	0	0	0	0	0	0	0	0	0	0	0	54	33	30	49	29	0	1	0	0	0	0
10	1	1	82	26.4463	1	122	1	1	0	100	200	100	9.87	211	0.289	5.77	10.4	3.55	114.2	0	1	1	1	0	3	0	1	0	0	0	0	0	0	1	0	0	0	1	51	35	35	49	19	0	0	1	0	0	0
5	0	0	55	24.61	1	133	0	0	1	77	120	70	9.17	315	0.953	12.14	40	2.54	45	0	1	1	1	0	1	1	0	0	0	0	0	0	0	1	0	0	0	0	54	33	30	49	29	0	1	0	0	0	0
8	0	0	72	19.81	0	99	1	0	1	72	112	60	10.56	158	11.229	5.42	38	2.66	53	1	1	1	1	0	3	0	1	0	0	0	0	0	0	0	1	0	0	0	67	32	26	42	24	0	1	1	0	0	0
12	1	1	77	23.9512	1	132	1	0	0	127	138	96	20.59	145	10	5.78	33.5	1.87	144.3	1	1	1	1	0	3	0	1	0	0	0	0	1	0	1	1	1	0	1	38	29	34	61	20	0	1	0	1	0	0
11	0	1	65	23.0327	0	126	1	0	1	63	150	69	6.79	187	0.3683	6.01	20	2.64	65	1	1	1	1	0	1	0	0	0	0	0	0	0	0	1	1	1	1	0	46	35	33	52	29	0	1	1	0	0	0
6	0	1	54	24.7654	1	128	1	1	1	68	120	90	6.21	170	0.279	7.06	14	2.69	64.5	1	1	1	0	0	1	0	1	0	0	0	0	1	0	1	1	1	0	1	58	40	30	58	31	1	1	1	1	0	0
12	1	0	75	14.7929	1	102	1	0	1	91	110	60	4.71	183	0.056	4.84	44.2	2.48	78	1	1	1	1	0	1	0	0	0	0	0	0	0	0	0	0	0	0	1	36	35	35	49	19	0	1	0	0	0	0
7	1	0	87	22.03	0	123	1	0	1	85	140	80	8.75	121	6.052	5.42	22	3.32	78	0	1	1	0	1	1	0	0	0	0	0	0	0	0	1	0	0	0	0	43	36	28	61	29	0	0	1	0	0	0
7	0	1	60	25.04	1	130	1	0	0	66	125	70	6.28	149	2.355	5.41	54	2.94	103	0	1	1	1	0	1	0	0	0	0	0	0	0	0	1	0	0	0	0	54	33	30	49	29	0	1	0	0	0	0
7	1	1	52	24.21	1	157	1	0	0	60	142	80	6.67	184	0.749	3.93	23	1.41	110	1	1	1	1	0	1	0	1	0	0	0	0	0	0	0	0	1	0	1	62	36	33	46	31	0	1	0	0	0	0
9	1	1	59	23.0175	0	119	1	0	1	125	92	60	8.14	139	0.2382	7.63	30	2.34	92	1	1	1	1	0	4	0	0	0	1	0	0	1	0	2	0	1	0	0	29	35	38	72	25	1	1	0	0	0	0
4	0	1	51	26.85	1	157	1	0	1	62	130	65	8.69	252	0.2	5.02	24	2.34	71	1	1	1	1	0	1	0	1	0	0	0	0	0	0	1	0	0	0	0	54	33	30	49	29	0	1	0	0	0	0
21	0	0	82	18.31	0	76	1	0	0	75	142	80	8.82	288	3.053	6.31	31	2.87	59	0	1	0	1	0	1	0	0	0	0	0	0	0	0	1	0	0	0	0	54	33	30	49	29	0	0	0	0	0	0
4	1	1	62	24.6019	0	137	1	0	0	98	120	90	10.29	194	1.313	8.02	26	2.85	156.6	1	1	1	1	0	1	0	1	0	0	0	0	0	0	1	0	1	1	0	50	32	30	46	29	0	1	0	0	0	0
14	1	0	80	22.6417	0	129	1	0	0	80	100	60	8.91	178	1.356	8.4	27	3.9	80.1	1	1	1	1	0	2	1	0	0	0	0	0	0	0	1	0	0	0	0	25	28	30	42	24	1	1	0	0	0	0
6	1	1	63	24.03	1	105	1	0	0	66	122	74	9.21	80	16	6.01	41	1.7	76	0	1	1	0	1	1	0	0	0	0	0	0	1	0	1	0	0	0	0	54	33	30	49	29	0	0	1	0	0	0
12	1	1	68	16.12	1	121	1	0	1	104	104	69	5.88	165	5.748	4.73	16	1.72	48	1	1	1	1	0	2	0	0	0	0	0	0	0	0	0	0	0	0	0	54	33	30	49	29	0	1	0	0	0	0
10	0	0	78	29.1363	0	123	1	0	0	90	130	80	8.63	139	2.45	6.18	38.1	2.41	102	0	1	1	1	0	1	0	1	0	0	0	1	0	0	1	1	1	0	1	51	35	35	55	19	0	0	1	1	0	0
10	1	0	66	25.47	0	107	1	1	1	78	128	84	8.47	261	0.598	5.28	75	2.33	68	1	1	1	1	0	1	0	0	0	0	0	0	0	0	1	1	1	0	1	70	28	30	43	26	0	1	0	0	0	0
22	1	1	57	27.6601	1	147	1	0	1	93	111	74	13.12	200	0.156	6.89	55.1	3.4	102	1	1	1	1	0	1	1	0	0	0	0	0	0	0	1	0	0	0	1	62	35	35	43	19	0	1	0	0	0	0
9	1	1	70	23.8754	1	119	1	0	1	102	170	90	6.62	202	0.282	11.89	13.9	3.98	118	0	1	1	1	0	1	0	0	0	0	0	0	0	0	2	1	1	0	1	51	35	35	63	19	0	0	1	1	0	0
6	1	1	72	22.86	1	145	1	1	1	69	161	102	5.78	219	0.714	4.88	17	1.92	62	0	1	1	1	0	1	0	1	0	0	0	0	0	0	1	1	1	0	0	47	37	34	58	33	0	1	0	0	0	0
13	1	0	75	23.1082	0	115	1	0	1	90	160	90	11.11	202	0.9084	8.4	42	4.07	85	1	1	1	1	0	1	0	1	0	0	0	0	1	0	2	0	2	0	0	33	25	30	44	24	1	0	1	0	0	0
5	1	1	78	15.63	1	125	1	0	0	78	118	68	12.39	191	7.659	4.4	45	1.71	89	0	1	1	0	1	1	0	1	1	0	0	0	0	0	1	0	0	0	0	60	30	28	41	26	0	0	1	0	0	0
6	0	1	58	21.26	1	134	1	0	1	80	120	80	13.56	165	0.356	5.11	13	2.15	57	0	1	1	1	0	1	0	0	0	0	0	0	0	0	1	0	1	1	0	60	27	27	49	27	0	1	0	0	0	0
3	1	1	67	20.2	0	109	0	0	0	62	107	64	13.94	177	16	6.7	67	2.15	140	0	1	1	1	0	2	0	1	0	0	0	0	0	0	1	0	0	0	0	54	33	30	49	29	0	0	1	0	0	0
17	1	0	74	21.43	0	127	0	0	0	80	91	66	5.7	191	16	3.86	40	3.15	57	0	1	1	0	1	1	0	0	0	0	0	0	0	0	1	1	1	1	0	49	35	32	49	25	0	1	0	0	0	0
11	1	0	62	22.0523	0	125	1	0	1	78	140	80	11	195	10	7.13	41	3.22	36	1	1	1	0	0	1	0	0	0	0	0	0	0	0	1	0	1	0	0	35	30	31	47	24	1	1	1	0	0	0
10	1	1	71	19.72	0	120	0	0	1	87	102	71	12.3	288	12.677	5.85	33	2.79	78	0	1	1	1	0	1	1	0	0	0	0	0	0	0	3	1	2	1	0	48	40	30	59	30	0	1	1	0	0	0
10	1	1	62	24.38	1	149	1	0	0	62	86	62	15	216	16	8.09	103	2.9	118	1	1	1	0	1	1	1	1	0	0	0	0	0	0	1	0	0	0	0	54	33	30	49	29	0	1	0	0	0	0
7	1	1	52	22.9434	1	125	0	0	0	89	95	60	10.54	225	1.476	4.67	151	1.43	66	1	1	1	1	0	1	0	0	0	0	0	0	0	0	1	0	1	0	1	55	36	35	55	32	0	1	0	0	0	0
5	0	0	62	25.47	1	119	1	1	1	72	140	90	9.49	316	0.001	7.29	14	2.12	69	1	1	1	1	0	1	1	1	0	0	0	0	0	0	1	0	0	1	0	71	27	32	43	29	0	1	0	0	0	0
11	1	0	64	24.65	0	118	1	0	1	88	176	88	8.75	169	16	12.33	24	2.3	43	0	1	1	0	1	1	1	1	0	0	0	0	0	0	1	0	0	0	0	52	34	26	50	24	0	1	1	0	0	0
3	0	1	66	24.22	1	144	0	0	1	72	120	74	6.86	122	16	6.61	41	3.28	57	1	1	1	1	0	1	0	0	0	0	0	0	0	0	1	0	0	0	0	54	33	30	49	29	0	1	0	0	0	0
10	1	1	72	20.63	0	94	1	0	1	101	138	76	5.7	473	0.431	5.31	20	2.2	86	1	1	1	1	0	1	0	1	0	0	0	0	0	1	1	1	1	0	0	53	32	28	51	31	0	1	0	1	0	0
6	1	0	76	22.5473	0	113	1	0	1	76	140	80	11.66	220	5.423	7.69	36	2.53	101.5	0	0	1	0	0	1	0	0	0	0	0	0	0	0	2	2	1	0	0	48	36	28	54	26	0	1	0	1	0	0
12	0	0	76	22.99	1	109	0	0	1	92	98	48	5.57	157	2.271	6.14	16	6.06	70	0	1	1	1	0	1	0	1	0	0	0	0	0	0	3	1	1	0	0	43	39	29	57	27	0	1	0	0	0	0
14	1	1	59	23.8751	1	141	1	0	1	70	94	56	10.67	226	0.144	5.66	89.9	3.2	100.9	1	1	1	1	0	1	0	1	0	0	0	0	0	0	1	0	0	0	1	52	35	35	45	19	0	1	0	0	0	0
6	1	1	87	24.03	1	134	1	0	0	60	144	60	8.3	195	16	5.16	19	3.63	81	0	1	1	1	0	1	0	0	0	0	0	0	0	0	0	0	0	0	1	54	33	30	49	29	0	1	0	0	0	0
12	1	1	60	23.7042	1	136	1	0	0	64	118	72	11.75	141	1.342	4.78	36	2.36	80.7	1	1	1	1	0	1	0	0	0	0	0	0	0	0	0	0	0	0	0	70	32	33	50	24	1	1	0	0	0	0
7	1	1	58	23.44	1	128	1	0	0	60	120	60	7.22	252	3.568	5.7	38	2.22	65	0	1	1	1	1	1	1	0	0	0	0	0	0	0	0	0	0	0	1	65	28	32	45	3	0	1	0	0	0	0
21	1	1	60	23.36	1	162	0	0	0	62	80	50	19.74	205	16	25.84	122	3.11	163	1	1	1	1	1	4	1	0	0	0	0	0	0	0	1	0	0	0	0	54	33	30	49	29	0	1	0	0	0	0
8	0	0	63	23.92	0	140	1	1	1	75	168	102	6.4	189	1.35	6.13	50	1.87	88	0	1	1	0	1	1	1	1	0	0	0	0	0	0	0	2	0	0	0	50	27	27	47	26	0	1	0	0	0	0
18	1	1	74	20.8209	1	130	1	0	1	79	143	84	11.07	176	3.81	6.38	27.5	2.24	94.3	1	1	1	1	0	2	0	1	0	0	0	0	0	0	1	0	0	0	1	62	35	32	51	18	0	0	1	1	0	0
17	0	1	48	31.25	1	132	1	0	1	65	110	80	13.5	253	16	6.68	44	4.56	76	0	1	1	0	1	1	0	0	0	0	0	0	0	0	2	0	1	0	0	54	36	31	58	31	0	1	0	0	0	0
3	1	1	66	24.4358	1	149	0	0	1	78	110	70	9.21	247	0.9895	4.83	43	3.79	82.3	1	1	1	1	0	1	0	0	0	0	0	0	0	0	1	0	0	0	1	63	35	30	45	31	1	1	1	0	0	0
6	0	1	34	26.89	0	151	1	0	1	92	152	94	8.32	232	5.687	6.7	14	3.11	74	0	1	1	1	0	1	0	1	0	0	0	0	0	0	1	0	2	0	0	37	29	43	41	38	0	1	0	0	0	0
3	1	0	78	29.14	0	114	1	1	0	90	172	90	9.56	155	16	9.76	31	2.24	111	0	1	1	1	1	3	0	1	0	0	0	0	0	0	1	0	0	0	0	54	33	30	49	29	0	1	0	1	0	0
11	0	1	62	21.48	0	133	1	0	0	68	148	82	9.33	167	1.143	15.77	20	2.89	76	0	1	1	0	1	1	1	1	0	0	0	0	0	0	0	0	0	1	0	64	29	27	42	31	0	0	1	0	0	0
9	0	1	68	20.52	0	129	1	1	0	68	140	70	6.15	147	11.034	6.28	38	1.5	101	0	1	1	1	0	1	1	1	0	0	0	0	0	0	0	0	0	1	0	71	32	33	43	28	0	1	1	0	0	0
12	1	1	57	18.424	1	119	1	0	1	84	110	80	6.72	170	3.53	17.86	33	1.37	79	1	1	1	1	0	2	1	0	0	0	0	0	0	0	0	0	1	0	1	51	35	35	49	19	0	1	0	0	0	0
13	1	1	50	23.9571	0	130	0	0	0	60	120	80	12.85	257	2.735	4.98	104	2.1	57	1	1	1	1	0	1	0	0	0	0	0	0	0	0	2	0	1	0	1	54	37	38	60	37	0	1	0	0	0	0
4	1	1	55	25.26	0	139	1	0	1	72	132	76	8.36	415	0.001	5.34	20	2.25	72	0	1	1	1	0	1	0	1	0	0	0	0	0	0	1	0	0	0	0	60	37	28	51	26	0	1	0	0	0	0
8	1	1	61	24.2215	1	128	1	0	1	90	125	80	11.93	194	2.74	6.22	94.3	2.22	102	1	1	1	1	0	2	0	0	0	0	0	0	0	0	1	0	0	0	1	57	35	35	45	19	0	1	0	0	0	0
5	1	1	57	25.8686	0	170	1	1	0	90	140	100	17.02	239	0.6481	6.03	116	3.03	65	1	1	1	0	0	1	0	0	0	0	0	0	0	0	1	0	0	0	1	60	33	34	54	32	1	1	1	0	0	0
3	1	1	75	28.04	1	135	1	0	1	138	138	78	6.59	284	1.5	6.7	95	2.49	100	0	1	1	0	1	2	0	1	1	0	0	0	0	0	1	0	0	0	0	54	33	30	49	29	0	1	0	0	0	0
10	0	1	73	21.86	1	95	1	0	1	77	120	74	4.3	198	0.702	4.36	75	1.78	70	1	1	1	1	0	1	0	0	0	0	0	0	0	0	1	0	1	1	0	58	28	25	44	27	0	1	1	0	0	0
10	1	1	57	26.18	1	152	1	1	1	96	136	88	11.27	158	16	5.92	45	2.12	74	0	1	1	0	1	1	0	1	0	0	0	0	0	0	0	0	1	1	0	53	27	27	51	26	0	1	0	0	0	0
9	1	1	76	22.1003	0	132	1	0	1	80	130	70	8.1	198	0.397	7.49	13.7	1.65	84	1	1	1	1	0	1	0	0	0	0	0	0	0	0	1	1	1	0	0	74	35	35	49	19	0	1	0	0	1	0
8	1	1	65	25.95	1	158	1	0	1	98	120	80	14.75	208	6.62	4.41	19	2.37	85	0	1	1	0	1	1	0	0	0	0	0	0	0	0	0	0	0	1	1	75	31	29	41	30	0	1	0	0	0	0
3	0	1	59	27.89	1	134	1	0	1	66	118	80	7.08	188	0.035	7.19	22	1.77	92	1	1	1	1	0	2	1	0	0	0	0	0	0	0	0	0	0	0	0	61	32	29	46	30	0	1	0	0	0	0
13	1	1	64	20.0692	0	117	1	0	1	82	126	90	7.23	153	5.19	3.93	302.9	1.86	107	0	1	1	1	0	2	0	0	0	0	0	1	0	0	2	1	1	0	1	30	46	41	66	24	0	0	0	1	0	0
9	0	0	71	20.13	1	108	1	0	0	75	124	92	4.81	215	0.017	4.71	19	2.83	52	0	1	1	0	1	1	0	0	0	0	0	0	0	0	1	1	1	0	0	60	29	29	47	28	0	1	0	0	0	0
11	1	0	54	29.2969	0	97	1	0	0	85	160	90	6.5	259	0.878	8.55	43.1	1.11	108	1	1	1	1	0	2	1	1	0	0	0	0	0	0	2	1	1	0	1	51	35	35	49	19	0	1	0	0	0	0
17	1	0	79	20.44	1	124	0	0	0	70	99	58	14.54	317	10	4.35	57	2.52	47	0	1	1	1	0	1	0	1	1	0	0	0	0	0	2	0	0	1	0	44	35	23	53	27	0	1	0	0	0	0
8	0	0	63	18.97	0	112	1	0	1	80	168	90	5.49	251	3.075	4.51	18	2.14	42	0	1	1	0	1	1	0	1	0	0	0	0	0	0	0	1	0	0	0	51	36	31	54	27	0	1	0	0	0	0
4	1	1	74	24.4292	0	134	1	0	1	90	130	78	8.62	161	0.01594	7.84	24	2.98	73	0	1	1	1	0	1	0	1	0	0	0	0	0	0	1	1	1	1	1	58	34	33	50	30	0	0	1	0	0	0
14	0	0	61	25.97	0	129	1	1	1	62	170	87	7.24	222	0.031	6.7	35	1.91	49	1	1	1	1	0	1	1	1	0	0	0	0	0	0	2	1	1	0	0	50	33	29	48	30	0	0	0	0	0	0
8	1	1	45	24.8	1	150	1	0	1	96	146	106	17.37	206	16	6.98	119	3.49	51	0	1	1	0	1	1	0	1	0	0	0	0	0	0	1	0	1	0	0	50	36	29	59	28	0	1	0	0	0	0
9	1	1	79	22.8487	1	149	1	0	1	66	130	70	3.17	152	0.03021	6.39	11	2.15	75.9	1	1	1	0	0	1	0	0	0	0	0	0	0	0	1	0	1	0	0	30	27	33	47	24	0	0	0	0	0	0
25	1	0	75	22.03	1	121	1	0	0	96	126	74	16.56	384	16	8.41	33	2.28	54	0	1	1	1	1	3	1	1	0	0	0	0	1	0	0	0	1	0	1	65	28	31	45	30	0	1	0	0	0	0
7	1	0	56	23.7154	0	133	1	0	1	82	128	83	7.77	205	10	8.25	69	4.43	92	1	1	1	1	0	1	0	0	0	0	0	0	0	0	0	0	0	0	0	25	29	28	44	22	1	1	0	0	0	0
6	0	0	68	24.44	0	135	1	1	1	75	176	75	10.37	225	0.001	7.66	6	3.73	74	0	1	1	1	0	2	1	1	0	0	0	0	0	0	0	0	0	0	0	66	25	23	36	27	0	1	0	0	0	0
12	1	0	64	19.7239	0	118	1	0	1	90	120	70	12.58	270	0.071	5.57	9.4	4.5	73.1	1	1	1	1	0	1	0	1	0	0	0	0	0	0	1	0	1	0	1	55	31	33	41	19	0	1	0	0	0	0
10	0	1	76	25.9516	1	120	1	0	1	74	96	60	9.32	147	0.994	5.63	27.3	2.22	98	1	1	1	1	0	1	0	0	0	0	0	1	0	0	1	1	1	0	1	51	35	35	59	19	0	0	1	1	0	0
7	1	1	57	24.1318	0	148	1	0	1	82	90	70	15.14	200	2.47	3.61	45	2.74	98.5	1	1	1	1	0	1	0	0	0	0	0	0	0	0	1	0	1	0	0	73	25	33	51	24	1	1	0	0	0	0
13	1	1	59	22.46	0	110	1	1	1	78	130	80	7.1	301	0.338	7.06	65	2.35	94	0	1	1	1	0	1	1	1	0	0	0	0	0	0	1	0	0	0	1	63	31	33	46	27	0	1	0	0	0	0
14	1	1	83	25.3906	1	113	1	0	1	80	150	95	9.15	250	1.2	4.54	4.2	3.8	97	1	1	1	1	0	3	0	1	0	0	0	0	0	0	1	1	1	0	1	38	36	36	58	17	0	0	0	1	0	0
6	1	1	73	23.2311	0	95	1	0	1	62	110	70	5.55	241	0.139	5.01	40	1.61	86.9	0	1	1	1	0	1	0	0	0	0	0	0	0	0	1	1	1	0	1	50	40	43	61	39	0	0	0	0	1	0
9	1	1	63	23.41	1	107	1	0	1	83	120	90	5.71	213	8.445	7.24	48	3.04	83	1	1	1	1	0	1	1	1	0	0	0	0	0	0	1	1	1	1	0	53	35	31	47	30	0	1	0	0	0	0
11	1	0	78	22.2636	0	125	1	0	0	72	120	70	10.54	225	2.417	8.16	30	2.59	92	1	1	1	0	0	1	0	0	0	0	0	0	0	0	0	1	1	0	0	64	24	32	35	23	1	1	1	0	0	0
17	1	1	65	22.15	0	137	0	1	0	103	168	92	5.37	251	0.036	5.38	14	3.4	90	0	1	1	1	0	2	1	1	0	0	0	0	1	0	1	0	0	0	0	54	33	30	49	29	0	0	0	0	0	0
14	0	1	69	23.31	1	106	1	0	1	65	116	56	9.63	231	9.444	3.96	18	0.92	91	0	1	1	0	1	3	0	0	0	0	0	0	0	0	1	0	0	0	0	54	33	30	49	29	0	1	0	0	0	0
9	1	0	69	21.8465	0	99	0	0	1	78	85	60	5.64	101	5.571	5.53	30	2.92	35	1	1	1	1	0	1	0	0	0	1	0	0	0	0	1	0	0	0	0	50	31	30	54	23	1	1	0	0	0	0
17	1	1	69	26.22	1	144	0	0	1	87	105	65	19.7	248	12.453	4.82	28	2.96	146	0	1	1	1	1	1	0	0	0	0	0	0	0	0	0	0	0	1	1	63	32	30	50	26	0	1	0	0	0	0
10	0	1	40	28.3937	1	125	0	0	1	84	120	80	10.47	223	0.922	11.65	50.5	3.04	102	1	1	1	1	0	1	0	0	0	0	0	0	0	0	1	0	0	0	1	51	35	38	49	19	0	0	0	0	0	0
18	0	0	73	23.94	1	69	1	0	1	88	101	53	14.06	181	2.755	5.81	22	3.18	84	0	1	0	1	0	2	1	1	0	0	0	0	0	0	2	1	0	0	0	63	33	28	49	27	0	0	1	0	0	0
7	0	1	80	23.94	0	147	1	0	0	101	136	69	14.26	95	0.17	5.88	45	1.88	168	0	1	0	1	0	4	0	1	0	0	0	0	0	0	1	0	1	0	0	56	32	32	43	30	0	0	0	1	0	0
9	1	0	54	22.7186	0	114	1	0	1	68	120	90	5.63	110	2.045	5.07	57	1.71	36	1	1	1	1	0	1	0	0	0	0	0	0	0	0	1	0	0	0	0	66	26	32	45	24	0	0	1	0	0	0
12	1	1	66	25.56	1	149	1	1	1	71	120	80	5.48	212	0.001	5.15	16	2.81	62	1	1	1	1	0	1	0	0	0	0	0	0	0	0	0	0	0	0	1	57	36	36	53	30	0	1	0	0	0	0
4	0	0	48	23.8	0	113	1	0	1	92	148	68	11.4	299	9.267	5.2	9	2.09	43	0	1	1	0	1	1	0	1	0	0	0	0	0	0	0	0	0	1	0	60	33	32	48	29	0	1	0	0	0	0
14	1	1	65	22.1453	1	128	1	0	0	57	140	70	11.71	150	0.22	5.28	34.4	1.78	113	1	1	1	1	0	1	1	1	0	0	0	0	0	0	1	1	1	0	1	70	35	35	49	19	0	1	0	0	0	1
8	1	0	69	23.19	0	99	0	0	0	72	123	76	8.48	168	13.526	11.9	228	3.77	97	0	1	1	0	1	3	1	1	0	0	0	0	0	0	1	0	0	0	0	54	33	30	49	29	0	1	0	0	0	0
10	0	1	65	24.24	0	147	1	0	1	66	110	80	6.63	188	0.025	5.45	35	2.98	62	1	1	1	0	1	1	0	1	0	0	0	0	0	0	0	0	0	0	0	77	31	31	41	28	0	1	0	0	0	0
7	0	1	75	22.04	0	130	0	0	1	71	115	59	5.45	169	5.032	5.08	22	2.04	139	0	1	1	1	0	1	0	0	0	0	1	1	0	0	3	1	0	0	0	35	38	26	59	24	0	0	1	1	0	0
12	1	1	66	49.95	1	120	1	0	0	55	154	72	5.39	219	2.933	4.66	12	2.71	74	1	1	1	1	1	1	0	0	0	0	0	0	0	0	0	0	1	1	1	75	28	33	43	32	0	1	0	0	0	1
11	1	1	67	20.9	1	112	1	0	0	65	178	68	4.8	132	0.001	3.87	18	3.29	62	1	1	1	1	0	1	0	1	1	0	0	0	0	0	1	0	0	0	0	54	33	30	49	29	0	1	0	0	0	0
8	1	1	58	23.38	1	156	0	0	1	74	92	62	8.18	124	18	6.02	45	3.51	71	1	1	1	0	1	1	0	0	0	0	0	0	0	0	1	1	0	1	1	58	30	32	49	32	0	1	0	0	0	0
12	1	0	83	33.3	0	146	0	0	1	118	92	69	10.28	288	9.512	7.47	67	3.25	72	0	1	1	0	1	2	0	0	0	0	0	0	0	0	1	0	1	0	1	56	22	27	42	27	0	1	0	1	0	0
7	0	1	68	22.23	1	124	1	1	1	78	152	72	6.82	198	3.403	4.99	17	3.14	120	0	1	1	0	1	1	0	0	0	0	0	0	0	0	2	1	1	0	0	48	36	31	56	30	0	1	0	0	0	0
3	0	0	62	23.94	0	122	0	0	0	78	118	69	6.8	184	7.1	6.7	13	2.52	48	1	1	1	0	1	4	0	0	1	0	0	0	1	0	1	0	0	0	0	54	33	30	49	29	0	0	0	0	0	0
16	1	1	51	28.3447	0	129	1	0	1	88	80	50	11.32	192	0.515	6.28	28.6	2.39	100	1	1	1	1	0	4	0	1	0	1	0	0	0	0	2	1	1	0	1	32	38	35	63	19	0	0	0	0	0	0
9	1	0	70	26.67	0	134	1	0	1	125	136	90	11.75	322	1.661	20.97	21	6.52	54	0	1	1	1	0	1	1	1	0	0	0	0	0	0	1	0	0	0	0	54	33	30	49	29	0	1	0	1	0	0
9	0	1	53	23.11	1	159	1	0	1	65	121	71	9.45	236	4.694	5.71	36	2.89	79	1	1	1	0	1	1	0	1	0	0	0	0	0	0	0	0	0	0	0	57	29	32	43	32	0	1	0	0	0	0
7	1	1	85	24.44	1	112	1	0	1	90	98	52	6.93	144	16	13.91	109	2.47	99	0	1	1	0	1	4	1	1	0	1	0	0	0	0	1	0	0	0	0	54	33	30	49	29	0	1	0	0	0	0
5	1	1	47	27.43	0	140	1	0	1	72	130	88	6.2	237	3.41	4.59	35	1.86	103	0	1	1	1	0	1	0	0	0	0	0	0	0	0	0	0	0	1	1	65	28	32	42	31	0	1	0	0	0	0
4	1	1	78	20.83	1	115	1	1	0	73	118	54	17.14	285	16	6.68	47	2.59	46	0	1	1	1	0	3	0	1	0	0	0	0	0	0	0	0	1	0	0	44	28	31	48	28	0	1	0	0	0	0
4	1	0	81	23.94	0	89	0	0	0	66	84	46	9.02	353	16	5.5	9	1.92	91	0	1	1	1	1	2	0	0	0	0	0	0	0	0	1	0	0	0	0	54	33	30	49	29	0	1	0	0	0	0
6	1	1	50	28.37	1	131	1	0	1	72	118	70	6.42	261	0.302	4.88	52	1.21	92	1	1	1	1	0	1	0	1	0	0	0	0	0	0	0	0	0	0	1	56	33	31	46	31	0	1	0	0	0	0
14	0	0	67	21.64	0	111	1	0	0	107	116	72	7.52	205	8.932	13.5	203	1.91	85	0	1	1	1	0	1	1	0	0	0	0	0	0	0	1	0	0	0	0	54	33	30	49	29	0	0	1	1	0	0
10	0	1	71	24.687	0	120	1	0	1	60	160	90	9.24	137	4.587	7.62	52	3.43	92.6	1	1	1	1	0	1	1	0	0	0	0	0	0	0	1	1	0	0	1	58	32	33	53	28	1	1	0	0	0	0
7	0	0	73	22.89	0	128	1	0	1	79	146	76	10.31	334	10.915	7.12	33	2.46	60	1	1	1	1	0	1	1	1	0	0	1	0	0	0	1	0	1	0	0	49	30	31	47	29	0	1	0	0	0	0
5	1	1	57	29.0318	0	148	1	0	1	78	186	92	13.02	291	5.49	5.24	65.2	3.25	81	1	1	1	1	0	2	0	1	0	0	0	0	0	0	1	0	1	0	1	57	35	35	51	19	0	1	1	0	0	0
12	0	0	76	18.7109	0	108	0	1	0	90	150	90	5.97	211	0.1	6.38	27.4	0.32	67.5	0	1	0	1	0	1	0	1	0	0	0	0	0	0	1	0	1	0	1	51	35	35	49	19	0	1	0	0	0	0
8	1	0	76	23.4133	0	118	0	0	0	60	90	70	11.89	238	0.07501	21	6	2.41	74.2	0	1	1	0	0	1	0	0	0	0	0	0	0	0	1	1	0	0	1	49	35	25	43	26	0	1	0	0	0	0
21	1	1	66	22.0744	0	128	1	0	1	85	130	65	6.92	106	7.844	7.15	141	1.57	158	0	1	1	0	0	1	0	0	0	0	0	0	0	0	0	1	1	0	0	52	24	28	39	20	0	1	0	0	0	0
8	1	0	74	22.4773	0	114	1	0	0	98	150	90	13.25	231	2.51	6.73	39	4.19	62	0	1	1	1	0	2	0	0	0	0	0	0	1	0	1	0	1	0	0	36	27	30	49	22	0	1	0	0	0	0
9	0	0	78	23.88	0	98	1	1	1	65	150	80	4.92	188	0.499	5.44	45	1.85	74	0	1	1	1	0	1	0	1	0	0	0	0	0	0	1	1	0	1	1	60	28	32	46	32	0	1	0	0	0	0
11	1	1	82	26.3	1	135	0	0	1	72	120	72	8.28	110	16	6.9	52	2.57	93	0	1	1	0	1	1	0	1	0	0	0	0	0	0	0	0	0	0	0	54	33	30	49	29	0	1	0	0	0	0
10	0	1	46	26.67	1	145	1	0	1	58	132	78	9.02	206	16	4.89	18	2.52	71	1	1	1	0	1	1	0	1	0	0	0	0	0	0	1	0	0	0	0	53	27	30	50	31	0	1	0	0	0	1
10	0	0	74	23.44	0	124	0	0	1	106	140	86	10.62	286	1.515	5.99	21	2.57	51	0	1	1	0	1	1	0	0	0	0	0	0	0	0	0	2	1	0	0	60	30	28	45	30	0	0	0	1	0	0
6	1	1	66	23.4236	0	122	1	0	1	72	130	80	5.87	213	0.064	7.47	93.7	2.35	69.1	1	1	1	1	0	1	1	1	0	0	0	0	0	0	1	0	1	0	1	66	27	32	47	19	0	1	1	0	0	0
8	0	0	47	21.34	0	121	1	0	1	70	123	83	4.99	248	0.281	5.94	115	1.63	57	1	1	1	1	0	1	0	1	0	0	0	0	0	0	0	0	1	0	0	67	31	28	39	28	0	1	0	0	0	0
8	0	1	78	26.45	1	128	1	0	1	70	120	80	6.82	230	1.666	5.2	19	2.66	77	0	1	1	1	0	1	0	1	0	0	0	0	0	0	0	0	0	1	0	58	35	35	47	33	1	1	0	0	0	0
14	1	0	75	18.75	1	127	0	0	1	72	132	96	8.16	115	5.463	10.31	69	2.04	42	0	1	1	0	1	3	0	0	0	0	0	0	1	0	1	0	0	0	0	49	34	31	46	31	0	1	0	0	0	0
3	1	0	71	24.97	0	70	0	0	0	114	86	62	4.11	190	13	9.12	7	1.15	56	0	1	1	0	1	4	0	0	0	1	0	0	0	0	0	1	1	0	0	28	27	24	46	28	0	1	0	0	0	0
7	0	0	61	19.31	1	124	1	0	1	85	128	84	7.52	326	4.2	4.98	21	3.37	55	1	1	1	0	1	1	0	1	0	0	0	0	0	0	3	1	2	1	0	30	40	45	58	38	0	0	1	1	0	0
10	1	1	65	18.2857	0	106	1	0	1	70	115	70	4.35	264	0.012	4.26	10.4	2.08	105	1	1	1	1	0	1	0	0	0	0	0	0	0	0	1	0	1	0	1	51	35	35	49	19	0	1	1	0	0	0
7	1	1	52	25.3902	0	157	1	1	1	74	110	70	7.38	150	0.101	3.65	27.3	1.88	97	1	1	1	1	0	1	0	1	1	0	0	0	0	0	1	0	1	0	1	51	35	35	49	19	0	0	1	0	0	1
7	1	1	57	25.95	1	146	1	0	0	58	120	78	9.1	317	0.194	4.51	184	1.92	70	1	1	1	1	0	1	0	1	0	0	0	0	0	0	0	0	0	0	1	64	26	25	47	33	0	1	0	0	0	1
14	1	0	71	17.898	0	103	1	0	1	94	96	63	8.89	171	3.01	2.97	22.4	2.78	53.6	1	1	1	1	0	3	0	1	0	0	0	0	0	0	1	0	1	0	1	48	41	33	50	20	0	1	0	0	0	0
5	1	0	65	21.12	0	141	1	0	1	79	150	90	6	195	0.117	6.7	45	2.52	45	0	1	1	1	0	1	0	1	0	0	0	0	0	0	0	0	1	0	0	51	29	28	44	25	0	1	0	0	0	0
8	0	1	58	25.7117	1	146	0	0	0	70	120	80	5.89	135	0.248	6.13	19.9	2.61	73.9	1	1	1	1	0	1	0	0	0	0	0	0	0	0	1	0	1	0	1	51	35	35	49	19	1	0	1	1	0	0
14	1	1	63	24.61	1	136	1	1	1	68	138	80	7.14	164	5.95	6.7	21	3.84	85	1	1	1	1	0	1	0	1	0	0	0	0	0	0	0	0	0	0	1	54	33	30	49	29	0	1	0	0	0	0
10	1	1	50	25.7117	0	141	0	0	0	75	128	90	7.74	254	0.008	5.42	27.3	1.03	111	1	1	1	1	0	1	0	1	0	0	0	0	0	0	0	0	0	0	1	65	33	32	46	16	0	0	0	0	0	0
6	1	1	48	24.6347	0	144	1	1	1	80	146	102	10.18	162	2.49	5.35	31	2.39	45.5	1	1	1	1	0	1	0	0	0	0	0	0	0	0	1	1	1	0	0	55	30	31	47	27	0	1	0	0	0	0
5	1	1	56	23.84	1	133	1	0	1	60	130	90	9.37	333	0.001	6.7	24	1.17	64	1	1	1	1	0	1	1	1	0	0	0	0	0	0	1	0	0	0	0	68	29	28	49	30	0	1	0	0	0	0
7	1	1	67	23.709	1	120	1	0	0	58	120	80	7.9	325	0.8257	7.17	49	1.9	66.6	1	1	1	1	0	1	0	1	0	0	0	0	0	0	0	2	0	0	0	58	30	32	61	23	0	1	0	0	1	1
8	1	0	64	20.7	1	128	1	0	1	78	128	80	12.65	230	11.707	15.21	40	3.95	38	0	1	1	1	0	2	1	1	0	0	0	0	0	0	1	0	0	0	0	51	33	28	37	26	0	1	0	0	0	0
7	0	1	44	21.97	1	155	0	1	1	75	174	101	7.94	237	0.14	5.02	137	3.64	92	1	1	1	1	0	1	0	1	0	0	0	0	0	0	1	0	0	0	0	65	30	27	42	28	0	1	1	0	0	0
16	1	0	47	27.55	1	135	1	0	1	64	132	84	10.93	353	16	5.2	19	2.99	49	1	1	1	1	0	1	0	1	0	0	0	0	0	0	0	0	1	0	0	74	30	31	46	31	0	1	0	0	0	0
7	0	1	67	27.34	1	146	1	0	1	72	138	78	5.56	204	1.278	5.1	20	1.9	147	0	1	1	0	1	1	0	0	1	0	0	0	0	0	1	1	1	1	0	55	33	32	50	29	0	1	0	1	0	0
8	0	1	60	26.03	0	133	0	0	1	98	112	69	10.02	257	5.97	6.7	69	1.27	97	1	1	1	0	1	1	1	1	0	0	0	0	0	0	1	0	0	1	0	49	28	35	48	31	0	1	0	0	0	0
16	1	1	49	21.4619	0	142	0	1	0	74	155	100	6.12	374	0.125	5.12	21.7	2.77	81	0	1	0	1	0	2	0	0	1	0	0	0	0	0	1	0	0	0	1	51	35	35	49	19	0	0	0	0	0	0
21	1	1	76	23.8	0	127	1	0	1	88	131	87	10.25	156	16	5.44	35	3.12	55	1	1	1	0	1	1	0	0	1	0	0	0	0	0	1	1	3	0	0	63	44	42	42	27	0	1	0	0	0	0
5	1	1	56	20.76	1	135	1	0	0	74	146	90	9.44	235	10.757	4.92	14	1.99	97	0	1	1	0	1	1	0	0	0	0	0	0	0	0	1	0	0	0	0	54	33	30	49	29	0	1	0	0	0	0
4	1	1	75	16.5289	1	129	1	0	1	80	120	80	9.04	174	1.44	6.91	16.4	1.94	109.7	0	1	1	1	0	1	0	1	0	0	0	0	0	0	1	2	0	0	0	51	35	35	49	19	0	1	0	0	0	0
13	1	1	58	21.22	1	161	1	0	1	78	98	62	11.32	150	16	6.65	79	3.61	75	1	1	1	0	1	1	1	1	0	0	0	0	0	0	1	0	1	0	0	49	29	30	37	28	0	1	0	0	0	0
11	1	0	74	17.78	0	104	0	0	1	66	134	70	11.55	216	16	6.26	51	3.79	48	0	1	1	0	1	1	0	0	0	0	0	0	0	0	0	1	1	0	0	40	35	29	52	29	0	1	0	0	0	0
6	0	0	71	19.53	0	97	0	0	0	64	80	53	13.87	157	16	6.8	67	3.69	68	0	1	1	1	0	4	0	0	0	0	0	0	0	0	1	0	0	0	0	54	33	30	49	29	0	1	0	0	0	0
5	0	0	70	20.83	0	118	0	0	0	60	136	72	5.8	193	0.175	6.3	22	2.65	72	0	1	1	1	0	1	0	0	0	0	0	0	0	0	0	0	1	0	0	50	29	31	42	28	0	1	0	0	0	0
14	1	0	76	22.4323	0	128	1	0	1	82	130	71	11.42	267	10	6.95	55.5	2.06	83	1	1	1	1	0	1	0	1	0	0	0	0	0	0	1	1	1	0	0	40	35	32	45	17	0	1	0	0	0	0
8	0	1	54	28.69	1	134	1	0	1	108	124	78	10.22	351	5.212	4.3	25	3.65	102	0	1	1	0	1	2	0	0	0	0	0	0	0	0	2	3	0	0	0	28	38	35	63	40	0	0	1	1	0	0
4	0	1	60	21.8	1	154	1	1	1	57	153	91	13.44	182	0.034	12.74	22	4.1	115	0	1	1	0	1	2	1	1	0	0	0	0	0	0	1	1	1	0	0	73	34	28	48	25	0	1	0	0	0	1
8	0	1	50	24.31	0	118	0	0	1	79	131	77	9.47	122	14.957	5.34	50	2.04	82	0	1	1	1	0	1	0	0	0	0	1	0	0	0	2	2	1	0	0	55	35	31	43	29	0	1	1	0	0	0
9	1	1	76	22.83	1	147	1	0	1	79	126	76	10.14	221	14.964	5.11	26	4.2	71	1	1	1	1	0	1	0	0	0	0	0	0	0	0	1	0	1	1	1	58	28	32	48	28	0	1	0	0	0	0
28	1	1	69	21.875	1	138	1	1	0	62	126	88	9.7	198	0.028	5.49	43.7	1.51	105	1	1	1	1	0	2	0	1	0	0	0	0	0	0	0	0	0	0	1	51	35	35	49	19	0	1	0	0	0	0
3	0	1	50	29.05	0	142	1	1	1	67	122	78	5.69	364	0.415	5.33	24	3.65	107	0	1	1	1	0	1	0	1	0	0	0	0	0	0	1	0	0	0	0	54	33	30	49	29	0	1	0	0	0	0
13	0	1	61	26.79	0	141	1	0	1	94	128	84	6.31	154	3.349	7.77	16	1.9	70	0	1	1	1	0	1	1	1	0	0	0	0	0	0	2	1	1	0	0	31	35	34	52	34	1	1	0	0	0	0
6	0	0	78	17.12	0	109	0	0	1	88	150	80	5.15	260	0.07	4.41	14	1.27	59	0	1	1	0	1	1	0	0	0	0	0	0	0	0	0	1	1	0	0	57	22	23	37	24	0	1	0	0	0	0
8	0	0	62	25.89	0	132	1	0	1	66	148	80	7.6	203	0.229	4.9	15	5.34	78	0	1	1	0	1	1	0	1	1	0	0	0	0	0	0	0	0	0	1	79	26	29	40	30	0	1	0	0	0	0
7	1	1	54	26.449	1	137	1	0	1	78	134	78	13.25	184	0.147	5.1	15.1	3.33	73	1	1	1	1	0	1	0	0	0	0	0	0	0	0	1	0	1	0	1	45	33	29	45	17	0	0	1	0	0	0
4	0	0	62	26.67	0	138	1	0	1	66	110	70	11.38	230	0.002	5.54	11	2.01	55	0	1	1	1	0	1	0	1	0	0	0	0	0	0	1	0	1	1	1	66	34	32	47	27	0	1	0	1	0	0
6	0	1	63	24.03	0	138	1	0	1	70	127	83	10.61	181	16	6.42	42	2.45	61	1	1	1	1	0	1	0	0	1	0	0	0	0	0	1	1	0	0	0	56	38	32	52	29	0	1	0	0	0	0
12	1	1	51	24.91	1	138	1	0	1	68	116	72	9.4	267	16	5.2	32	3.23	90	1	1	1	1	0	1	0	1	0	0	0	0	0	0	1	1	1	0	1	56	30	32	47	30	0	1	0	0	0	0
6	1	1	39	25.95	1	158	1	0	0	66	135	72	11.38	188	16	5.28	46	2.1	93	0	1	1	1	0	1	0	0	0	0	0	0	0	0	0	0	1	1	1	65	31	29	45	30	0	1	0	0	0	0
6	0	1	61	20.76	1	150	0	0	1	57	150	75	6.65	127	0.139	4.79	14	3.3	88	0	1	1	1	0	1	0	0	0	0	0	0	0	0	1	1	1	1	0	51	33	32	48	30	0	1	0	0	0	1
5	1	1	73	22.04	1	146	1	0	1	65	120	80	8.29	200	16	5.05	53	2.69	109	0	1	1	0	1	2	0	0	0	0	0	0	0	0	0	1	0	0	0	40	36	26	47	28	0	1	1	0	0	0
10	1	0	64	23.9715	0	113	1	0	1	98	125	70	10.5	309	6.11	11.87	45.8	1.36	58	1	1	1	1	0	1	1	1	0	0	0	0	0	0	1	1	1	0	1	40	36	37	61	17	0	1	1	0	0	0
10	1	1	50	25.8741	1	152	1	0	1	91	180	104	12.43	158	2.15	8.65	44	3.84	81	1	1	1	1	0	1	0	1	0	0	0	0	0	0	1	0	1	0	1	63	38	29	50	30	0	0	0	0	0	0
10	1	0	53	24.966	0	132	1	0	1	70	140	70	11.79	205	3.864	9.16	40	1.85	64.7	1	1	1	1	0	1	1	0	0	0	0	0	0	0	2	0	2	1	0	9	40	42	59	34	0	1	0	0	0	0
3	1	1	27	25.62	1	167	1	0	1	69	120	70	10.81	535	0.001	4.66	115	1.55	77	1	1	1	1	0	1	0	0	0	0	0	0	0	0	1	0	0	0	0	54	33	30	49	29	0	1	0	0	0	0
8	0	1	70	25.65	1	146	1	1	1	72	120	70	8.21	291	0.029	5.6	15	4	103	0	1	1	0	1	1	0	1	0	0	1	0	1	0	0	0	0	0	0	59	33	31	48	29	1	1	0	0	0	0
20	1	1	33	23.5989	0	131	1	0	1	72	100	80	12.04	145	0.1142	6.18	37	2.6	61.5	1	1	1	1	0	2	0	0	0	0	0	0	0	0	1	0	1	0	0	33	24	30	47	24	0	1	0	0	0	0
9	1	1	72	23.6362	1	144	1	0	1	88	160	80	5.32	127	0.7007	5.14	37	2.72	95	1	1	1	1	0	1	0	1	0	0	0	0	0	0	1	0	1	0	0	61	27	32	48	24	0	1	0	0	0	0
19	1	1	49	24.3952	0	149	1	0	1	75	150	90	11.27	226	1.546	8.4	11	0.2	92	1	1	1	1	0	1	0	0	0	0	0	0	0	0	0	0	0	0	0	43	26	30	54	24	0	1	0	0	0	0
9	1	1	67	23.8751	1	107	1	0	0	110	119	86	7.87	156	0.03	8.57	18.9	3.05	78.5	1	1	1	1	0	3	0	1	0	0	0	0	0	0	1	0	1	0	1	34	38	35	58	19	0	1	0	0	0	0
30	0	0	78	23.94	0	132	1	0	1	106	146	76	4.54	151	0.714	5.14	102	1.81	55	0	1	1	1	0	4	0	1	0	0	0	0	1	0	3	0	1	0	0	33	38	37	66	31	0	0	1	1	0	0
6	1	1	60	23.66	1	134	1	0	1	53	107	69	6.86	160	16	3.63	33	3.42	63	0	1	1	0	1	1	0	0	0	0	0	0	0	0	0	0	1	1	1	68	28	31	52	30	0	1	0	0	0	1
12	1	1	49	24.2117	1	138	1	1	1	60	130	75	14.4	214	4.622	9.88	189	3.19	84.8	1	1	1	1	0	1	1	1	0	0	0	0	0	0	1	0	0	0	0	39	24	31	49	24	1	1	0	0	0	0
4	1	0	86	18.67	1	108	0	0	0	88	120	75	11.91	161	16	8.74	101	2.3	55	0	1	1	1	1	4	0	1	0	0	0	0	1	0	1	0	1	0	1	60	31	31	48	30	0	1	0	0	0	0
10	0	1	63	27.68	1	135	1	0	1	67	136	76	8.86	227	2.584	6.31	20	2.82	91	1	1	1	1	0	1	0	0	0	0	0	0	0	0	0	0	0	0	0	62	35	31	50	28	0	1	0	0	0	0
11	1	1	58	24.51	1	156	1	0	1	92	146	84	10.13	299	16	7.98	51	2.56	75	1	1	1	1	0	1	1	0	0	0	0	0	0	0	1	0	1	0	1	64	28	34	48	28	0	1	0	0	0	0
9	1	1	45	23.53	1	129	1	0	1	48	124	84	9.1	259	4.339	4.71	45	3.47	73	1	1	1	1	0	1	0	1	1	0	0	0	0	0	0	0	0	0	1	58	31	33	51	28	0	0	1	0	0	1
4	1	1	61	26.03	0	157	1	1	1	96	146	88	10.59	223	10.498	10.16	51	2.29	94	0	1	1	0	1	1	0	1	0	0	0	0	0	0	1	0	1	0	1	70	31	26	34	27	0	0	0	0	0	0
6	1	1	45	25.1409	0	159	1	0	1	78	140	100	10.86	200	1.222	6.65	47	2.7	92	1	1	1	0	0	1	0	0	0	0	0	0	0	0	1	0	0	0	0	56	27	30	46	23	0	1	0	0	0	0
6	1	1	70	23.3435	0	116	0	0	0	72	120	70	7.57	113	0.3985	7.96	27	3.13	97	1	0	1	1	0	1	0	1	0	0	0	0	0	0	1	0	1	0	1	50	28	29	51	24	0	1	0	0	0	0
17	1	0	79	17.78	1	117	0	0	1	78	120	80	6.12	185	11.869	6.62	23	3.65	90	0	1	1	1	0	1	0	0	0	0	0	0	0	0	1	0	2	2	0	52	28	26	44	28	0	1	0	0	0	0
29	1	1	37	23.995	0	147	0	0	0	82	140	90	5.95	152	1.008	3.97	36	2.7	96.9	1	1	1	0	0	1	0	0	0	0	0	0	0	0	1	1	1	1	0	65	30	33	52	24	1	1	0	0	0	0
8	0	0	76	23.8716	1	132	1	0	1	68	144	86	13.33	305	0.3786	6.38	12	4.15	95.6	1	1	1	1	0	1	0	1	0	0	0	0	1	0	1	0	1	0	1	65	34	30	52	29	1	1	0	0	0	0
8	1	0	51	25.39	1	124	1	0	1	64	140	72	12.27	308	15.046	4.75	27	3.87	60	0	1	1	1	1	1	1	1	0	0	0	0	0	0	0	0	0	0	1	70	29	27	42	28	0	1	0	0	0	0
5	1	1	43	26.45	1	156	1	0	1	80	152	114	11.11	166	16	11.09	80	1.97	102	0	1	1	0	1	1	1	1	0	0	0	0	0	0	1	0	0	0	0	54	33	30	49	29	0	1	1	0	0	0
6	1	1	50	26.548	0	145	1	1	1	87	170	110	9.22	154	1.263	6.14	28	2.23	78.2	1	1	1	1	0	1	0	0	0	0	0	0	0	0	0	0	0	1	1	60	33	32	43	32	0	1	0	0	0	0
9	1	1	52	27.89	0	152	1	0	0	76	132	80	9.42	194	16	5.63	29	2.8	90	1	1	1	1	0	1	0	0	0	0	0	0	0	0	0	0	0	0	0	52	30	29	50	26	0	1	0	0	0	0
7	1	1	62	21.83	1	109	1	0	1	70	150	80	8.37	261	4.47	4.89	28	2.19	88	0	1	1	1	0	1	0	1	0	0	0	0	0	0	1	0	1	0	1	63	25	30	43	29	0	0	1	0	0	0
11	1	1	57	20.5761	1	143	1	0	1	89	149	100	9.57	299	0.008	5.38	31.2	2.01	54.3	1	1	1	1	0	1	0	1	0	0	0	0	0	0	0	1	1	0	1	54	35	35	49	19	0	1	0	0	0	0
12	1	0	62	25.51	0	133	1	0	1	90	100	60	12.3	350	16	6.7	45	2.52	53	1	1	1	1	0	3	0	0	0	0	0	0	0	0	0	0	0	0	0	39	36	28	44	25	0	1	0	0	0	0
14	1	1	48	25.0759	1	143	1	0	1	80	130	100	12.55	177	1.89	8.64	45	2.41	85.3	1	1	1	1	0	1	0	0	0	0	0	0	0	0	1	0	1	1	1	45	33	30	58	27	0	1	0	0	0	0
5	1	1	60	23.2743	1	121	1	1	1	60	140	80	4.99	152	0.02261	7.62	12	1.56	77.8	1	1	1	1	0	1	0	1	0	0	0	0	0	0	1	0	0	0	0	66	32	33	53	24	0	1	1	0	0	0
8	0	1	66	23.38	1	135	1	0	1	60	92	64	6.95	257	0.001	5.06	32	2.072	88	1	1	1	1	0	2	0	0	0	0	0	0	0	0	1	0	0	0	0	54	33	30	49	29	0	1	1	0	0	0
14	0	1	81	20.2	1	118	1	0	1	69	125	58	10.93	164	0.001	5.95	49	4.34	161	0	1	1	0	1	2	0	0	0	0	0	1	0	0	0	0	1	0	0	50	33	27	41	25	0	0	0	1	0	0
14	1	1	84	25.43	0	126	0	0	0	84	143	87	6.2	158	13.357	11.36	20	3.7	95	0	1	1	1	0	1	1	1	1	0	0	1	0	0	1	1	0	0	0	38	36	41	59	29	0	0	0	0	0	0
7	1	1	54	22.72	1	141	1	0	1	68	122	84	7.39	149	5.783	5.1	25	5.57	73	0	1	1	1	0	1	0	0	0	0	0	0	0	0	1	1	1	0	0	49	34	32	51	30	0	1	0	0	0	0
12	1	1	60	23.03	1	122	1	0	1	76	110	75	7.22	144	8.669	6.21	83	2.16	70	0	1	1	1	0	2	1	0	0	0	0	0	0	0	2	1	1	1	0	41	37	32	56	32	0	1	0	0	0	0
7	0	0	81	22.89	0	130	1	0	0	50	120	66	10.9	199	16	10.85	21	2.74	68	0	1	1	1	1	4	1	1	0	0	0	0	0	0	1	0	0	0	0	54	33	30	49	29	0	1	0	0	0	1
11	0	0	74	25.39	0	116	1	0	1	90	119	76	7.1	170	3.2	7.65	38	2.62	85	1	1	1	0	1	2	1	1	0	0	0	0	0	0	2	0	2	0	0	48	36	28	49	28	0	1	0	0	0	0
13	1	1	60	21.7993	1	125	0	0	0	49	90	56	13.64	132	5.35	5.9	57.4	1.6	64.9	1	1	1	1	0	1	0	0	0	0	0	0	0	0	1	1	1	0	1	46	35	35	49	19	0	1	0	0	0	1
12	1	0	66	22.5775	0	126	1	0	1	100	150	90	11.89	174	1.757	12.24	60	4.11	56	0	1	1	1	0	3	0	1	0	0	0	0	0	0	1	1	1	0	1	27	32	29	57	25	0	1	0	0	0	0
16	1	1	54	27.4302	1	140	1	0	1	84	120	80	4.99	95	2.38	11.55	26.7	1.67	131	1	1	1	1	0	2	1	0	0	0	0	1	0	0	2	0	1	0	1	40	40	37	62	18	0	0	0	1	0	0
8	1	1	60	27.34	1	171	1	1	1	79	175	80	10.72	244	2.428	15.18	35	3.69	76	0	1	1	1	0	1	1	1	1	0	0	0	1	0	0	0	1	0	1	64	30	28	49	28	0	1	0	0	0	0
8	0	1	75	25.6896	1	133	1	0	1	67	125	74	9.86	202	1.17	5.38	20.3	2.33	76	1	1	1	1	0	1	0	0	0	0	0	0	0	0	1	0	1	0	1	51	35	35	49	19	0	1	0	0	0	1
10	0	1	69	28.125	0	127	1	1	1	80	160	80	5.12	130	0.014	5.03	13	1.78	94	1	1	1	1	0	1	1	1	0	0	0	0	0	0	1	1	1	0	1	50	35	35	55	19	0	1	0	0	0	0
11	1	0	68	19.72	0	134	0	0	1	108	92	68	14.48	208	16	6.61	71	2.82	67	0	1	1	1	0	2	0	0	0	0	0	0	0	0	2	0	2	0	0	37	31	26	46	25	0	1	1	1	0	0
9	1	1	45	24.3628	1	141	1	0	1	65	120	90	12.86	193	0.01163	11.88	57	3.68	83	1	1	1	1	0	1	0	0	0	0	0	0	0	0	1	0	0	0	0	67	28	33	42	24	1	0	1	0	0	0
16	0	0	79	22.4021	0	119	0	0	0	78	100	62	11.51	90	2.49	4.61	84	1.57	78.2	0	1	1	1	0	1	0	0	0	0	0	0	0	0	0	0	0	0	0	70	23	28	41	20	0	0	0	0	0	0
20	0	1	71	21.9713	0	119	1	0	1	105	180	110	7.61	186	0.099	4.79	10.8	2.36	78.7	1	1	1	1	0	2	0	1	0	0	0	0	0	0	2	1	1	0	1	38	40	35	60	19	0	0	1	1	0	0
8	1	1	64	23.74	1	129	0	0	1	61	118	76	11.84	194	16	6.74	26	2.67	77	0	1	1	1	0	1	1	0	0	0	0	0	0	0	1	0	0	0	1	61	34	30	44	28	0	1	0	0	0	0
9	1	1	73	18.83	0	103	1	0	1	73	124	71	6.27	252	0.001	4.65	18	0.99	88	0	1	1	1	0	2	0	0	0	0	0	0	0	0	0	1	2	0	0	44	27	32	42	29	0	1	0	0	0	0
16	1	1	73	19.53	0	93	1	0	1	92	132	84	8.98	176	16	5.22	31	2.5	100	0	1	1	1	0	2	0	1	0	0	0	0	0	0	2	0	2	0	0	46	33	32	44	29	0	1	0	0	0	0
10	0	1	62	19.83	1	135	1	1	1	63	158	98	6.7	195	0.241	4.8	8	1.72	49	0	1	1	1	0	1	0	1	0	0	0	0	0	0	1	0	1	0	0	68	34	30	42	29	0	1	0	0	0	0
9	1	0	49	23.3446	0	118	1	0	1	98	120	70	8.78	189	0.08512	5.29	19	3.85	57.2	1	1	1	1	0	2	0	0	0	0	0	0	0	0	1	0	1	0	1	60	28	31	47	28	1	1	0	0	0	0
11	1	1	54	25.95	1	135	1	0	1	72	115	74	7.6	152	16	4.92	19	3.02	84	1	1	1	1	0	1	0	0	0	0	0	0	0	0	1	0	0	0	0	65	35	28	50	29	0	1	1	0	0	0
4	1	1	61	27.04	1	155	1	0	1	66	104	68	9.26	193	14.944	5.74	41	2.67	99	0	1	1	0	1	1	0	1	0	0	0	0	0	0	1	0	0	0	0	54	33	30	49	29	0	1	0	0	0	0
14	1	1	45	27.18	0	156	1	0	1	91	138	82	14.62	215	16	9.81	82	2.99	62	0	1	1	0	1	4	1	0	0	1	0	0	0	0	0	0	0	0	0	31	42	29	59	28	0	1	0	0	0	0
5	0	1	58	25.18	1	133	0	1	0	70	110	70	7.81	211	3.7	6.51	19	2.11	99	0	1	1	0	1	1	1	0	0	0	0	0	0	0	1	1	0	0	0	44	36	35	56	33	0	0	1	0	0	0
8	0	0	71	26.67	0	98	1	0	1	72	127	65	7.81	393	1.287	7.2	14	3.13	52	0	1	1	1	0	1	1	1	0	0	0	0	0	0	1	0	1	0	1	73	27	27	45	26	0	1	0	0	0	0
6	1	1	64	23.2201	1	128	1	0	1	78	125	85	8.16	284	0.09553	5.49	29	1.45	73.1	1	1	1	0	0	1	0	0	0	0	0	0	0	0	1	0	0	0	0	56	30	28	48	26	0	1	0	0	0	0
11	0	1	71	26.49	0	135	1	1	1	70	158	79	10.14	238	1.689	6.68	32	2.73	110	1	1	1	1	0	3	1	1	0	0	0	0	1	0	1	0	0	0	0	54	33	30	49	29	0	0	0	1	0	0
4	1	1	49	22.1	1	63	1	1	0	71	178	90	3.99	495	1.123	3.31	45	2.52	198	0	1	0	0	0	2	0	1	1	0	0	0	0	0	0	1	1	0	0	65	35	31	51	30	0	1	1	1	0	0
23	0	1	45	24.51	1	139	0	0	1	68	105	71	15.19	203	0.746	6.5	46	3.03	69	0	1	1	1	0	1	0	1	1	0	0	0	0	0	1	0	1	1	0	57	33	35	52	35	0	1	0	0	0	0
12	0	0	57	22.54	0	144	1	1	1	64	170	90	7.31	171	0.001	5.3	14	1.07	49	1	1	1	1	0	1	0	1	0	0	0	0	0	0	1	1	1	0	0	64	27	25	43	25	0	0	1	0	0	0
8	0	1	63	22.48	1	130	1	0	1	72	120	68	15.12	316	12.725	6.25	37	2.5	79	0	1	1	1	0	2	0	1	0	0	0	0	0	0	1	2	0	0	0	60	34	30	50	33	0	1	0	0	0	0
11	0	1	45	20.94	0	126	1	1	1	71	130	84	6.45	185	1.749	5.49	18	1.53	75	0	1	1	1	0	1	0	0	0	0	0	0	0	0	0	0	0	0	0	78	24	24	46	25	0	1	0	0	0	0
8	0	0	54	27.82	0	99	0	0	1	64	93	58	10.81	159	16	5.87	28	1.56	60	0	1	1	1	0	1	0	1	0	0	0	0	0	0	2	0	0	1	0	50	36	30	48	33	0	1	0	0	0	0
8	1	1	51	29.7211	0	169	0	1	0	81	186	110	9.73	296	0.122	5.86	66.6	5.27	77	1	1	1	1	0	1	0	1	0	0	0	0	0	0	1	1	1	0	1	70	33	30	48	17	0	1	0	0	0	0
8	1	1	64	23.4065	1	134	1	0	1	76	130	95	13.28	175	0.793	6.03	43	2.44	117	1	1	1	1	0	1	0	0	0	0	0	0	0	0	1	1	1	0	0	60	30	32	45	26	0	1	0	0	0	0
5	0	1	53	25.89	1	143	1	0	1	62	110	90	13.29	281	7.056	5.63	43	2.98	88	0	1	1	1	0	1	1	0	0	0	0	0	0	0	1	0	0	0	1	73	31	29	37	29	0	1	0	0	0	0
12	1	1	63	26.0802	1	119	0	0	0	56	125	70	7.92	238	0.022	6.1	17	1.88	75	1	1	1	1	0	1	0	0	0	0	0	0	0	0	1	0	0	0	1	50	38	35	49	19	0	1	1	0	0	1
9	0	1	56	26.22	1	149	1	0	1	85	145	91	11.96	163	16	6.7	45	3.5	65	0	1	1	1	0	1	0	0	0	0	0	0	0	0	1	0	0	0	0	54	33	30	49	29	0	0	1	0	0	0
8	0	1	51	19.14	1	127	0	0	0	55	107	57	9.91	201	16	5.42	15	2.45	67	1	1	1	1	0	1	0	0	0	0	0	0	0	0	0	0	0	0	0	58	26	27	47	28	0	1	0	0	0	1
12	0	0	62	21.6441	0	112	0	0	1	78	110	70	5.38	157	0.055	4.86	36.6	2.54	68	1	1	1	0	1	1	0	0	0	0	1	0	0	0	1	1	0	0	1	57	35	35	49	19	0	1	0	0	0	0
6	1	1	48	24.9762	0	169	0	0	1	105	140	80	16.52	204	0.8762	7.4	62	2.7	78	1	1	1	0	0	1	0	0	0	0	0	0	0	0	1	0	0	0	0	52	22	28	43	23	0	1	0	0	0	0
8	1	1	42	31.25	1	141	0	1	0	88	120	70	7.03	152	0.156	8.73	53.1	2.08	74	1	1	1	1	0	1	0	0	0	0	0	0	0	0	0	0	0	0	1	73	30	35	50	18	0	1	0	0	0	0
13	0	1	65	23.6244	1	187	1	0	1	68	136	80	5.24	190	0.009	4.84	68.3	2.51	61	1	1	1	1	0	2	0	1	0	0	0	0	0	0	0	1	0	0	1	43	41	35	49	20	0	1	0	0	0	0
9	0	0	76	24.6711	0	107	1	0	1	77	160	100	7.3	326	0.028	4.77	11.6	6.05	68	1	1	1	1	0	2	0	1	0	0	1	0	0	0	0	1	2	0	1	51	38	35	49	19	0	0	1	0	0	0
10	1	1	47	25	1	150	1	0	0	74	130	70	12.57	214	0.458	5.28	23	2.35	77	1	1	1	1	0	1	0	1	0	0	0	0	0	0	1	0	1	0	1	54	32	30	50	20	0	1	0	0	0	0
9	1	1	56	24.2026	0	114	0	1	0	87	110	76	7.89	115	0.9041	7.04	29	1.83	92	1	1	1	1	0	2	0	1	0	0	0	0	0	0	1	1	0	0	0	57	34	34	46	33	0	1	0	0	0	0
5	1	1	56	23.9229	0	139	1	0	1	74	145	93	9.93	253	0.07055	5.51	24	3.5	55	1	1	1	0	0	1	0	0	0	0	0	0	0	0	0	0	0	0	0	70	26	30	44	23	0	1	0	0	0	0
13	1	1	55	26.1719	1	152	1	0	1	58	85	60	10.45	246	0.033	6.8	88.9	3.45	84	1	1	1	1	0	2	0	1	1	0	0	0	0	0	1	1	0	0	1	52	27	37	45	17	0	1	0	0	0	1
7	1	1	54	22.76	0	130	1	0	1	68	84	52	9.59	370	1.48	5.82	67	2.61	164	1	1	1	0	1	1	0	0	0	0	0	0	0	0	0	0	1	0	1	71	29	27	52	26	0	1	0	0	0	0
21	1	1	77	23.0055	1	109	1	1	1	78	100	64	12.94	203	4.694	4.88	66	3.03	133.4	0	1	1	0	0	1	0	1	1	0	0	0	0	0	1	1	0	0	0	25	28	33	55	24	0	1	0	1	0	0
14	1	1	61	25.7554	1	158	1	0	1	126	160	110	10.08	228	0.2117	6.2	50	3.1	82.9	1	1	1	1	0	1	0	0	0	0	0	0	0	0	0	0	0	0	1	56	39	37	49	35	0	1	0	0	0	0
6	1	1	78	23.4236	1	130	1	0	1	80	145	86	10.54	207	4.9	6.86	41.6	2.77	101	0	1	1	1	0	2	0	1	0	0	0	0	0	0	1	1	0	0	1	57	35	35	46	19	0	1	1	0	0	0
9	1	1	72	23.15	0	112	0	1	1	78	185	105	8.4	183	2.52	6.7	102	2.03	243	0	1	0	0	1	1	0	1	0	0	0	0	0	0	0	0	1	1	1	65	30	29	50	25	0	1	0	0	0	0
9	1	1	65	25.0147	0	136	1	0	1	77	135	85	6.69	174	2.519	5.36	53	1.93	82	1	1	1	1	0	1	0	0	0	0	0	0	0	0	0	0	0	1	0	58	30	34	50	31	1	1	1	0	0	0
15	1	1	72	27.5482	1	133	1	0	0	76	100	80	13.79	188	0.009	6.86	21.8	1.92	76.7	1	1	1	1	0	2	0	0	0	0	0	0	1	0	0	1	0	0	1	60	34	37	48	22	0	0	1	1	0	0
9	0	1	67	23.2134	0	125	1	0	1	58	150	80	6.2	109	0.04023	4.97	63	3.07	77	1	1	1	1	0	1	0	0	0	0	0	0	0	0	1	0	0	0	0	75	27	30	42	24	0	1	0	0	0	1
5	0	1	46	25.33	1	139	1	0	1	85	145	85	7.44	223	1.749	5.22	45	7.29	90	0	1	1	0	1	1	1	0	0	0	0	0	0	0	0	0	0	0	0	71	29	28	45	27	0	1	1	0	0	0
7	1	1	68	22.8433	1	134	0	0	0	74	102	56	11.94	218	0.2472	8.4	15	2.92	92	1	1	1	1	0	2	0	0	0	0	0	0	0	0	1	0	0	1	0	69	24	30	45	23	1	1	0	0	0	0
10	0	1	53	26.81	1	176	1	0	1	84	170	110	11.08	185	0.095	6.01	42	3.08	92	1	1	1	0	1	1	1	1	0	0	0	0	0	0	0	0	0	0	0	58	26	27	46	24	0	1	0	0	0	0
9	0	0	65	21.5	0	116	1	0	1	96	110	72	7.76	242	0.589	6.37	23	1.68	115	0	1	1	1	0	1	0	1	0	0	0	0	0	0	1	1	1	1	0	60	30	28	48	28	0	1	0	0	0	0
14	1	1	44	26.64	0	119	1	0	1	91	120	80	7.94	262	0.1	5.37	243	2.22	108	1	1	1	1	0	1	1	1	0	0	0	0	0	0	0	0	0	0	0	54	33	30	49	29	0	1	1	0	0	0
10	0	1	78	20.28	1	81	1	1	1	74	118	72	4.92	124	6.738	5.79	25	1.86	88	1	1	1	1	0	1	0	0	0	0	0	0	0	0	1	0	1	0	0	40	30	30	52	35	0	1	0	0	0	0
14	1	0	50	23.0112	0	120	1	0	0	62	150	80	8.12	225	0.064	4.98	26.5	3.64	66	0	1	1	1	0	1	0	0	0	0	0	0	0	0	1	0	0	0	1	66	33	35	49	19	0	0	0	0	0	0
9	0	0	65	23.2889	0	136	1	1	1	70	120	80	11.73	210	0.6524	5.74	38	3.68	46.1	1	1	1	0	0	1	0	1	0	0	0	0	0	0	0	1	0	0	0	30	26	33	41	24	0	1	1	0	0	0
9	0	0	63	26.04	0	149	0	0	1	98	101	70	4.09	179	4.577	5.45	16	2.98	102	1	1	1	1	0	4	0	1	0	1	0	0	0	0	1	0	0	0	0	54	33	30	49	29	0	0	1	1	1	0
15	0	1	76	24.6306	0	138	1	0	1	116	160	110	12.68	152	0.0805	15.54	30	6.36	102.9	1	1	1	0	0	2	0	0	0	0	0	0	0	0	1	0	0	1	0	39	40	34	60	28	1	1	0	0	0	0
9	1	1	50	28.57	1	137	1	1	1	68	124	78	12.38	259	10.692	5.41	31	2.28	77	1	1	1	1	0	1	1	1	0	0	0	0	0	0	1	0	1	0	1	47	35	31	56	29	0	1	0	0	0	0
7	1	1	64	17.97	1	114	1	0	1	72	148	72	7.1	113	16	7.16	47	1.42	83	0	1	1	0	1	1	0	0	0	0	0	0	0	0	2	0	1	0	1	55	23	32	48	30	0	1	1	0	0	0
12	1	1	73	23.9233	1	144	1	0	1	58	170	95	8.77	252	0.037	7.1	45.9	2	81	0	1	1	1	0	1	0	0	0	0	0	0	0	0	0	1	1	0	1	55	38	33	43	19	0	1	0	0	0	1
18	1	1	64	24.2854	0	125	1	1	1	80	120	70	6.28	191	0.02332	15.99	42	1.56	71	1	1	1	1	0	1	0	0	0	0	0	0	0	0	0	1	2	0	0	55	33	37	46	32	0	1	0	0	0	0
7	0	1	67	22.59	0	138	1	0	1	59	139	61	7.26	213	1.841	4.57	45	2.06	106	1	1	1	1	0	1	0	1	0	0	1	0	0	0	1	1	1	0	0	69	38	31	49	28	0	1	0	0	0	1
14	0	1	59	23.03	1	132	1	0	1	72	120	70	9.79	162	1.63	4.7	46.3	3.82	104	1	1	1	1	0	1	0	1	0	0	0	0	0	0	1	1	0	0	1	47	30	29	50	18	0	1	1	0	0	0
1	1	0	69	23.4236	0	111	1	0	1	98	110	70	6.22	192	5.71	7.71	35	2.18	75	0	1	1	1	0	4	0	1	0	0	0	0	0	0	0	1	1	0	1	32	39	33	47	17	0	0	1	0	0	0
11	1	1	81	29.07	0	124	1	0	1	75	124	70	12.7	213	16	5.81	18	2.52	94	1	1	1	0	1	1	0	1	0	0	0	0	0	0	1	0	0	0	0	54	33	30	49	29	0	1	0	0	0	0
11	1	0	50	18.55	0	98	1	0	1	73	122	82	4.95	133	16	6.06	33	3.1	81	0	1	0	0	1	1	0	0	0	0	0	0	0	0	1	0	0	0	0	54	33	30	49	29	0	1	0	0	0	0
8	0	1	41	22.15	1	152	1	0	1	76	120	80	8.5	229	0.082	5.42	72	1.5	83	0	1	1	1	0	1	0	0	0	0	0	0	0	0	0	0	0	0	0	50	25	29	48	29	0	1	0	0	0	0
8	1	1	62	23.4	0	128	1	0	1	66	135	84	11.36	262	3.019	5.23	39	2.74	62	0	1	1	1	0	1	0	0	0	0	0	0	0	0	1	1	1	0	0	43	34	33	55	32	0	1	0	0	0	0
9	1	1	79	20.24	1	109	1	0	0	78	152	92	9.52	108	16	6.38	24	2.65	90	0	1	1	0	1	1	0	0	0	0	0	0	0	0	0	0	0	0	0	46	26	24	48	23	0	1	0	0	0	0
7	1	0	49	21.1417	0	102	0	0	0	104	59	29	15.09	165	1.335	5.13	63	2.1	55.3	1	1	1	1	0	1	0	0	0	1	0	0	0	0	1	0	1	1	0	42	26	30	49	23	1	0	0	0	1	0
10	0	1	45	26.62	0	150	1	0	1	62	146	100	10.07	317	1.659	5.27	17	2.83	79	1	1	1	0	1	1	0	1	0	0	0	0	0	0	0	0	0	0	1	67	31	30	46	33	0	1	0	0	0	0
8	0	1	71	21.48	1	133	1	0	1	74	140	80	7.81	159	0.001	6.7	10	2.37	90	0	1	1	0	1	1	0	1	1	0	0	0	0	0	0	0	1	0	1	58	31	30	44	30	0	0	1	0	0	0
9	0	1	46	29.3	1	142	1	0	1	77	106	66	7.39	219	1.866	4.78	44	2.77	90	1	1	1	1	0	1	0	0	0	0	0	0	0	0	1	0	0	0	0	54	33	30	49	29	0	0	1	1	0	0
11	1	1	59	23.3581	1	122	1	0	1	98	120	70	9.19	165	0.7935	5.82	23	1.86	76.5	1	1	1	1	0	1	0	0	1	0	0	0	0	0	1	1	0	1	0	54	30	32	50	27	0	1	0	0	0	0
5	1	0	79	24.974	0	123	1	1	1	65	160	100	7.42	144	1.49	6.2	36.5	2.77	71	0	1	1	1	0	1	0	1	0	0	0	0	0	1	1	1	1	0	1	45	35	35	44	19	0	0	1	1	0	0
9	1	1	37	21.3	1	112	0	0	0	62	90	58	6.4	158	15.336	4.64	33	1.79	90	1	1	1	1	0	1	0	0	0	0	0	0	0	0	0	0	0	0	0	65	25	30	47	32	0	1	0	0	0	0
7	0	1	44	27.68	1	145	1	0	1	66	154	68	9.48	209	16	6.41	27	4.45	76	0	1	1	1	0	1	1	1	0	0	0	0	0	0	0	0	0	0	0	64	33	29	48	30	0	1	0	0	0	0
9	0	0	62	23.12	0	112	1	0	0	69	147	84	6.47	180	16	9.17	36	2.95	51	0	1	1	0	1	1	1	1	1	0	0	0	0	0	1	0	0	0	0	54	33	30	49	29	0	1	0	0	0	0
10	1	0	33	28.28	1	116	1	0	1	105	127	82	15	214	9.061	11.82	34	2.53	38	1	1	1	1	0	1	1	0	0	0	0	0	0	0	1	0	0	0	0	47	34	28	38	29	0	1	1	0	0	0
12	1	0	45	22.6003	0	148	1	0	1	80	128	108	17.21	330	1.91	16.83	29.2	3.05	74	1	1	1	1	0	1	1	1	0	0	1	0	0	0	1	1	1	0	1	45	32	32	50	17	0	0	1	0	0	0
5	0	1	41	23.23	1	150	1	0	1	74	130	110	6.14	217	0.079	4.67	53	1.62	83	0	1	1	1	0	1	0	1	0	0	0	0	0	0	0	0	0	0	0	58	25	29	39	33	0	1	0	0	0	0
17	1	1	56	22.5245	1	119	1	0	1	84	115	78	9.14	317	4.256	6.1	39.14	2.93	92	1	1	1	1	0	1	0	0	0	0	0	0	0	0	1	0	1	0	1	55	26	27	44	25	1	1	0	0	0	0
10	0	0	63	20	0	108	1	0	0	62	134	72	10.81	196	4.089	6.37	26	1.38	58	1	1	1	1	0	1	0	1	0	0	0	0	0	0	1	0	0	0	0	54	33	30	49	29	0	0	1	0	1	0
6	1	1	61	23.8578	0	149	1	1	1	102	160	100	8.51	159	0.2005	5.56	16	2.47	81.8	1	1	1	1	0	2	0	0	0	0	0	0	1	0	1	0	1	0	0	45	30	32	50	28	0	1	0	0	0	0
3	1	1	51	21.8	1	146	1	0	1	80	111	75	12.16	189	0.039	4.82	49	4.96	101	0	1	1	1	0	2	0	0	0	0	0	1	0	0	1	0	1	0	0	30	34	34	54	33	0	0	0	1	0	0
13	0	1	56	19.8347	1	137	1	0	1	75	130	80	9.15	244	0.118	4.8	30.7	2.44	81	1	1	1	1	0	1	0	0	1	0	0	0	0	0	1	1	0	0	1	51	30	33	47	18	0	1	0	0	0	0
16	1	1	50	24.0238	1	151	1	0	1	45	113	85	17.87	316	0.505	5.3	49.2	2.77	70	0	1	1	1	0	2	0	1	0	0	0	0	0	0	0	0	0	0	0	51	35	35	49	19	0	1	0	0	1	1
6	1	0	75	21.6413	0	78	1	1	1	76	160	120	8.6	183	0.989	6.82	37.8	2.59	66.6	0	1	1	1	0	3	0	1	0	0	0	0	0	0	1	0	1	0	1	40	35	35	49	19	0	1	0	0	0	0
10	0	1	59	24.2215	1	162	0	0	0	92	132	76	7.18	216	0.08	4.08	30.8	3.57	80	1	1	1	1	0	1	0	0	0	0	0	0	0	0	0	0	0	0	1	51	35	35	49	19	0	1	0	0	0	0
20	0	1	54	27.39	1	119	1	0	1	72	113	89	12.17	259	4.512	4.74	67	2.68	64	1	1	1	1	0	1	0	0	0	0	0	0	0	0	1	0	0	0	0	54	33	30	49	29	0	1	1	0	0	0
9	0	0	62	23.4952	0	115	0	0	1	98	150	86	9.05	191	0.227	4.49	69.8	3.96	68.9	0	1	1	1	0	2	0	0	0	0	0	0	0	0	2	1	1	0	1	12	37	35	72	19	0	0	0	1	0	0
16	1	1	65	23.6244	0	134	1	1	1	82	150	90	8.34	257	0.785	5.76	21.6	3.62	130	0	1	1	1	0	2	0	1	0	0	0	0	0	0	1	0	0	0	1	36	35	35	49	19	0	1	0	1	0	0
13	1	1	85	18.29	1	150	1	0	0	55	86	50	12.35	140	9.838	4.24	15	3.18	118	0	1	1	1	0	4	0	0	0	1	0	0	0	0	1	1	1	0	1	46	23	31	38	30	0	1	0	0	0	1
18	0	0	63	26.22	0	105	0	0	1	83	118	58	6.85	123	10.499	10.34	22	2.96	72	0	1	1	1	1	3	1	0	0	0	0	0	0	0	2	1	2	1	0	45	37	34	40	31	0	1	0	0	0	0
14	1	1	77	21.7181	1	150	0	1	1	88	140	70	11.94	143	20	5.69	10.2	3.06	96	1	1	1	0	1	2	1	1	1	0	0	0	0	0	0	1	0	0	1	50	38	32	48	18	0	1	0	0	0	0
8	1	1	58	21.2585	1	133	1	0	1	80	134	96	6.16	215	3.31	6.22	23.1	2.87	88.8	0	1	1	1	0	1	0	0	0	0	0	0	0	0	1	0	1	0	1	51	35	35	49	19	0	1	0	0	0	0
12	1	0	72	23.6131	0	124	0	1	1	72	110	70	13.46	239	2.709	7.82	74	3.06	85	1	1	1	1	0	1	0	0	0	0	0	0	0	0	1	0	1	0	1	60	35	32	40	32	0	1	1	0	0	0
12	1	1	58	24.88	1	134	1	0	1	68	102	50	6.78	258	10.099	5.75	43	2.97	73	1	1	1	1	0	1	0	1	1	0	0	0	0	0	1	1	1	0	0	40	36	28	55	28	0	1	0	0	0	0
16	1	1	46	24.2215	0	133	0	0	1	82	111	70	13.62	225	1.62	11.37	18.6	1.3	57	1	1	1	1	0	1	0	0	0	0	0	0	0	0	1	1	1	0	1	40	35	35	57	19	0	1	0	0	0	0
15	1	1	71	22.8813	0	129	1	0	1	94	130	78	17.69	166	0.0362	8.38	14	2.22	104.2	1	1	1	1	0	1	0	0	0	0	0	0	0	0	1	1	0	0	0	50	29	30	47	27	0	1	0	0	0	0
7	0	0	77	23.94	0	87	0	0	1	72	112	72	10.72	235	0.4	6.7	57	2.49	212	0	1	1	1	0	4	1	1	0	1	0	1	0	0	1	0	0	0	0	54	33	30	49	29	0	0	1	1	0	0
14	0	1	53	21.6128	1	137	0	0	1	88	140	80	11.42	213	1.45	5.89	34.9	3.01	71.9	1	1	1	1	0	1	0	1	0	0	0	0	0	0	2	0	0	0	1	58	33	35	33	19	0	1	1	0	0	0
12	1	0	50	25.56	0	117	1	0	1	65	108	73	14.76	187	9.939	5.17	41	2.55	99	0	1	1	1	0	1	1	1	0	0	0	0	0	0	0	0	0	0	0	54	33	30	49	29	0	1	0	0	0	0
8	0	1	76	26.12	1	140	0	0	0	56	148	79	9.1	100	0.24	4.88	14	2.17	78	0	1	1	1	0	1	0	1	0	0	0	0	0	0	1	0	0	0	0	54	33	30	49	29	0	0	0	0	0	1
7	0	1	72	25.7117	1	150	1	0	1	88	152	86	6.72	120	0.49	4.97	16.3	2.88	93	1	1	1	1	0	1	0	1	0	0	0	0	0	0	1	1	1	0	1	52	35	35	45	19	0	1	0	0	0	0
7	1	1	74	21.6128	1	139	1	0	0	89	140	90	5.51	240	0.055	8.2	36	1.84	80	0	1	1	1	0	1	0	1	0	0	0	0	0	0	1	1	0	0	1	53	37	35	60	19	1	1	0	0	0	0
15	1	1	49	26.3958	1	142	0	0	1	72	100	70	7.5	171	0.645	6.86	36.6	2.77	76	0	1	1	0	0	2	0	0	0	0	0	0	0	0	1	0	0	0	1	40	36	36	56	17	0	0	1	1	0	0
17	1	0	64	23.4236	0	95	1	0	1	78	128	76	8.32	440	1.49	7.58	7.9	2.54	78	1	1	1	1	0	1	1	1	1	0	0	0	0	0	1	1	1	0	1	51	34	35	52	19	0	1	0	0	0	0
9	1	1	77	20.31	1	125	0	0	0	92	100	69	16.33	185	16	5.65	45	1.5	77	0	1	1	0	1	3	0	0	0	0	0	0	1	0	2	0	1	1	0	30	34	30	52	28	1	1	0	0	0	0
13	0	1	50	23.03	1	142	1	0	1	98	156	106	11.69	280	0.273	6.7	45	2.52	60	1	1	1	0	1	2	0	0	0	0	0	0	0	0	1	0	0	0	0	43	32	33	43	29	0	1	0	0	0	0
9	1	1	64	27.99	1	131	1	1	1	92	150	78	8.14	149	11.482	3.94	42	2.08	63	0	1	1	1	0	1	1	1	0	0	0	0	0	0	1	1	0	0	1	65	35	28	46	28	0	1	0	0	0	0
17	1	0	67	23.4236	1	98	0	0	1	68	124	76	11.37	249	10	10.65	93	2.85	86.7	1	1	1	1	0	3	0	0	0	0	0	0	0	0	1	0	1	0	1	32	33	33	52	20	0	1	1	0	0	0
6	0	1	86	23.4236	1	107	1	0	0	82	150	96	9.55	211	0.448	6.19	12.6	3.47	219.8	0	1	0	1	0	1	0	1	1	0	1	0	0	0	1	0	1	0	1	51	35	35	49	19	0	0	1	1	0	0
9	1	1	47	21.9713	1	149	1	0	1	75	130	65	11.3	205	0.836	4.52	44.5	4.27	77	1	1	1	1	0	1	0	0	0	0	0	0	0	0	1	0	0	0	1	51	35	35	49	19	0	1	0	0	0	0
9	0	1	65	20.8611	1	111	1	0	1	70	160	80	7.08	137	0.817	5.3	20.31	2.77	84.6	0	1	1	1	0	1	0	1	0	0	0	0	0	0	1	0	0	0	1	58	34	33	51	17	0	0	1	0	0	0
7	1	1	61	23.18	1	138	1	0	1	63	109	79	8.63	258	0.001	4.84	10	2.45	93	1	1	1	1	0	1	0	0	0	0	0	0	0	0	1	0	1	0	1	73	31	30	53	33	0	1	0	0	0	0
8	1	1	75	21.2585	1	113	1	0	1	77	121	71	6.33	154	36	4.84	12.9	1.94	94.5	1	1	1	1	0	2	0	1	0	0	0	0	0	0	0	1	0	0	1	61	35	35	49	19	0	0	1	0	0	0
11	1	1	58	32.85	1	151	0	0	1	96	86	68	11.27	223	6.306	9.93	40	1.55	82	1	1	1	0	1	1	1	1	1	0	0	0	0	0	0	0	0	0	0	45	33	26	58	30	0	0	0	0	0	0
12	1	1	57	22.96	1	132	1	0	1	112	100	76	8.36	254	0.049	3.89	9	2.9	109	0	1	1	1	0	3	0	1	0	0	0	0	0	0	1	1	1	0	0	27	36	31	73	24	0	0	1	1	0	0
13	1	0	72	26.0262	0	123	1	1	1	80	220	110	10.97	185	0.033	6.64	14.1	2.19	73	1	1	1	1	0	2	0	1	0	0	0	0	0	0	0	0	0	0	1	52	36	35	50	16	0	0	1	1	0	0
10	0	1	62	21.3039	0	126	0	0	1	70	120	80	6.27	232	0.064	5.68	31.2	1.77	61	1	1	1	1	0	1	0	1	0	0	0	0	1	0	1	1	0	0	1	45	35	35	49	19	0	1	0	0	0	0
11	1	0	69	22.8329	0	103	1	0	1	105	130	90	11.61	158	1.65	6.04	41.6	2.13	99	1	1	1	1	0	3	0	1	0	0	0	0	0	0	1	0	0	0	1	45	36	35	54	19	0	0	1	0	0	0
10	1	1	50	18.53	1	131	0	0	1	62	96	52	9.94	187	16	4.99	46	1.78	81	1	1	1	0	1	1	0	0	0	0	0	0	0	0	1	0	1	0	0	45	32	30	52	29	0	1	0	0	0	0
13	1	1	72	23.4236	0	136	1	1	1	105	165	100	8.8	154	1.18	7.64	25	2.26	75.7	1	1	1	1	0	2	1	1	0	0	0	0	0	0	1	0	1	0	1	58	35	35	50	19	0	0	1	0	0	0
9	1	1	57	19.1001	1	141	1	0	1	55	90	60	10.82	90	0.42	5.09	40.6	3.29	53.4	1	1	1	0	0	1	0	0	0	0	0	0	0	0	1	0	1	0	1	50	34	35	52	19	0	0	1	0	0	1
26	1	1	58	19.052	1	130	0	0	1	108	75	50	18.36	286	10	9.35	193.9	2.27	55	1	1	1	1	0	4	1	1	0	1	0	0	0	0	1	0	1	0	1	28	33	32	46	18	0	0	1	0	0	0
9	1	0	66	22.4057	0	97	1	0	0	72	125	80	13.86	192	1.345	5.47	23	3.58	53.6	1	1	1	0	0	2	0	0	0	0	0	0	0	0	0	1	1	1	0	43	35	31	47	26	0	1	0	0	0	0
11	1	0	70	22.4448	0	119	1	0	1	84	140	90	13.31	151	1.861	7.38	55	2.15	49	1	1	1	1	0	1	0	0	0	0	0	0	0	0	1	0	1	0	0	38	21	28	49	23	0	1	0	0	0	0
7	1	1	71	23.1247	1	114	1	0	1	70	140	80	7.89	183	3.09	6.23	27.4	2.26	62.8	1	1	1	1	0	2	0	0	0	0	0	0	0	0	1	0	0	0	1	51	38	35	49	19	0	1	0	0	0	0
7	1	1	62	23.4236	1	153	1	0	1	74	180	120	11.66	194	0.141	4.57	47.1	3.57	131	1	1	1	1	0	2	0	1	0	0	0	0	0	0	1	0	1	0	1	38	30	30	52	17	0	1	0	0	0	0
3	1	0	75	23.44	1	98	0	0	1	82	94	51	8.69	240	13	6.7	16	4.45	99	0	1	1	0	1	4	0	0	0	1	1	1	0	0	1	0	0	0	0	54	33	30	49	29	0	0	1	1	1	0
9	1	1	62	17.72	1	130	0	0	0	68	123	80	11.48	195	11.52	4.85	70	2.2	96	0	1	1	0	1	3	0	0	0	0	0	0	0	0	1	0	0	0	0	54	33	30	49	29	0	1	0	0	0	0
7	0	1	79	21.4533	0	85	0	1	0	78	130	70	6.25	241	0.639	5.51	13.4	2.86	95	1	1	1	1	0	1	0	0	1	0	0	0	0	0	1	2	1	0	1	52	41	35	59	19	0	1	0	0	0	0
5	0	1	44	25.8645	1	154	0	1	1	86	170	120	12.78	223	0.162	4.19	18.9	2.65	58.2	0	1	1	1	0	1	0	0	0	0	0	0	0	0	0	1	0	0	1	61	35	35	49	19	0	1	0	0	0	0
15	1	1	77	23.4327	0	134	1	0	1	86	110	86	16.47	204	1.538	4.99	20	2.55	127	0	1	1	1	0	1	0	1	0	0	0	0	1	0	1	2	1	0	1	40	32	35	58	30	0	1	0	0	0	0
5	0	1	60	23.4236	0	137	1	0	0	57	138	88	9.14	167	0.165	4.46	14.7	2.25	76	0	1	1	1	0	1	0	0	0	0	0	0	0	0	0	0	1	0	1	51	35	35	49	19	0	1	0	0	0	1
9	0	0	61	23.7479	0	114	1	0	1	70	140	80	9.83	291	0.973	5.16	37	4.72	91	1	1	1	0	0	1	1	1	0	0	0	0	0	0	1	1	0	0	0	50	30	30	46	26	1	1	0	0	0	0
9	1	1	50	23.8281	1	145	0	0	1	80	95	68	17.43	206	10	8.11	86.7	2.64	84.3	0	1	1	1	0	3	0	0	0	0	0	0	0	0	1	1	0	0	1	30	35	32	49	16	0	1	0	0	0	0
9	1	1	41	23.9995	1	156	1	0	1	80	140	70	6.87	166	0.008	4.9	84.4	1.58	64	1	1	1	1	0	1	0	1	0	0	0	0	0	0	1	1	1	0	1	56	29	30	51	18	0	1	0	0	0	0
2	1	1	77	23.4236	1	117	0	0	0	45	110	75	13.06	168	0.467	3.91	130.2	1.29	197.6	0	1	1	1	0	4	0	0	1	1	0	0	0	1	1	0	1	0	1	51	35	35	49	19	0	0	1	0	0	1
10	0	0	82	25.3906	0	123	0	1	0	95	185	80	10.11	173	0.055	9.18	9.7	2.82	112.5	1	1	1	1	0	2	0	1	0	0	1	0	0	0	1	1	1	0	0	51	35	35	49	19	0	0	0	1	0	0
22	0	0	75	26.3535	0	137	1	0	1	68	120	55	14.51	198	0.268	7.32	48.4	1.74	70.6	0	1	1	1	0	2	0	0	0	0	1	0	0	0	1	1	1	0	1	35	38	30	47	15	0	1	0	0	0	0
3	0	1	52	24.2	1	130	0	1	1	85	133	86	12.28	193	2.035	5.92	24	1.67	116	0	1	1	1	0	2	1	1	0	0	0	0	0	0	1	0	0	0	0	54	33	30	49	29	0	0	1	0	0	0
7	0	1	59	21.2953	1	138	1	0	1	80	120	70	8.9	243	0.125	6.21	13.8	2.44	61	0	1	1	1	0	1	0	0	0	0	0	0	0	0	0	0	0	0	0	69	26	36	43	17	0	0	1	0	0	1
11	1	0	57	21.0938	0	128	1	0	0	77	123	72	8.23	228	8.37	5.59	33.5	2.91	58	1	1	1	1	0	1	0	1	0	0	0	0	0	0	1	0	1	0	1	70	37	31	42	20	0	1	0	0	0	1
7	0	1	68	24.22	0	146	1	0	1	72	115	70	8.13	122	0.205	4.9	12	6.43	92	1	1	1	0	1	1	0	0	0	0	0	0	0	0	0	0	1	0	0	56	26	30	41	26	0	0	1	1	0	0
10	1	1	66	23.4236	1	155	1	0	1	68	126	80	11.64	239	0.009	6.86	41.6	3.13	99	0	1	1	1	0	1	0	1	0	0	0	0	0	1	1	0	1	0	1	45	35	36	51	18	0	1	0	0	0	0
18	1	1	34	25.5308	1	152	1	0	1	85	113	85	14.57	247	2.416	6.88	176	2.6	88.6	1	1	1	0	0	2	0	0	0	0	0	0	0	0	1	0	1	1	0	36	41	27	64	25	0	1	1	0	0	0
15	1	1	73	25.0135	1	133	1	0	1	100	145	86	9.57	189	0.834	9.83	22.9	2.46	89	1	1	1	1	0	2	0	0	0	0	0	0	0	0	1	1	0	0	0	54	30	31	45	18	0	1	1	0	0	0
5	0	1	80	23.3221	0	131	1	1	1	90	120	60	5.49	127	0.1937	7.79	15	2.75	92	0	1	1	1	0	1	0	1	0	0	0	0	1	0	1	1	1	0	0	62	24	32	54	24	0	1	1	1	0	0
9	1	1	61	24.02	0	143	1	0	1	83	127	85	7.29	194	2.582	5.68	12	2.99	94	1	1	1	1	0	1	0	0	0	0	0	0	0	0	1	0	0	0	1	69	28	29	44	28	0	1	0	0	0	0
15	1	1	86	18.75	1	125	1	1	1	100	210	120	9.68	212	2.76	5.11	19	2.14	192	0	1	1	1	0	3	0	1	0	0	0	0	1	0	1	1	1	0	1	35	34	30	57	16	0	1	1	1	0	0
8	1	0	48	23.7954	0	136	1	1	1	80	154	95	10.24	155	1.22	4.69	18.9	1.85	53	1	1	1	0	0	1	0	1	0	0	0	0	0	0	0	0	1	0	1	51	35	35	49	19	0	1	0	0	0	0
9	0	0	60	23.42	0	120	1	0	1	74	148	76	4.05	174	6.298	6.7	45	2.52	74	1	1	1	1	0	1	0	1	0	0	0	0	0	0	0	0	1	0	0	61	27	31	48	29	0	0	1	0	0	0
4	0	1	65	25.31	1	143	1	1	1	66	139	82	12.3	263	5.323	4.32	14	2.17	108	0	1	1	1	0	1	1	1	0	0	0	0	0	0	0	0	0	1	0	72	32	34	45	28	0	1	0	0	0	0
7	1	1	72	24.68	0	129	1	0	1	66	149	68	6.31	153	5.794	4.58	49	2.5	98	1	1	1	0	1	1	0	1	0	0	0	0	0	0	1	0	0	0	0	54	33	30	49	29	0	1	1	0	0	0
10	1	1	49	26.0617	1	143	1	0	0	82	160	80	12.92	216	0.809	6.3	23.8	3.27	69	1	1	1	1	0	1	0	1	0	0	0	0	0	0	1	1	1	0	1	51	38	35	49	19	0	1	0	0	0	0
12	0	1	55	20.69	1	138	0	0	1	72	110	70	5.2	180	3.34	4.81	10	2.71	67	1	1	1	1	0	1	0	0	0	0	0	0	0	0	0	0	1	0	0	62	31	32	48	30	0	1	0	0	0	0
15	1	1	55	22.1453	1	49	1	0	1	90	117	67	8.31	161	1.43	7.39	59.1	2.32	56.9	0	1	0	1	0	1	0	1	1	0	0	0	0	0	1	1	1	0	1	54	35	38	61	19	0	1	0	0	0	0
6	1	1	63	22.68	1	144	1	0	1	86	116	76	22.69	149	16	5.81	48	1.7	69	1	1	1	0	1	1	0	0	0	0	0	0	0	0	1	0	0	0	0	54	33	30	49	29	0	1	0	0	0	0
8	1	0	80	23.4236	0	119	1	0	1	82	145	85	6.76	191	0.935	4.66	12.2	3.06	69.8	0	1	1	1	0	2	0	0	0	0	0	0	0	0	0	1	1	0	1	35	36	36	57	18	0	1	1	0	0	0
12	0	1	63	21	1	146	0	0	1	56	154	82	12.81	175	0.268	7.15	35	3.71	64	1	1	1	1	0	1	1	1	0	0	0	0	0	0	1	0	0	0	0	54	33	30	49	29	0	1	0	0	0	1
8	0	1	60	22.0386	0	130	1	0	1	96	120	80	9.82	175	0.124	11.5	19.4	1.59	94.7	1	1	1	1	0	1	1	0	0	0	0	0	0	0	1	0	1	0	1	51	35	35	49	19	0	0	1	0	0	0
8	0	0	59	28.3	0	106	0	0	0	91	94	66	9.62	292	5.048	18.81	22	5.26	79	0	1	1	0	1	3	1	1	0	1	0	0	0	0	1	0	0	0	0	31	29	28	45	24	0	1	0	0	0	0
8	0	1	74	23.51	1	123	0	1	1	71	150	80	4.8	138	6.238	4.14	22	2.97	89	1	1	1	0	1	1	0	1	0	0	0	0	0	0	0	1	1	0	1	56	32	24	53	23	0	1	0	0	0	0
35	1	1	63	22.9387	0	135	1	0	1	80	110	80	8.91	121	1.542	4.67	24	2.85	59.1	1	1	1	0	0	1	0	0	0	0	0	0	0	0	1	0	0	1	0	35	29	33	45	24	1	1	0	0	0	0
12	1	1	58	27.34	1	153	1	0	1	83	145	94	14.96	266	10.145	5.8	71	3.64	99	1	1	1	0	1	1	0	0	0	0	0	0	0	0	0	0	0	0	1	55	34	26	44	27	0	1	0	0	0	0
13	1	0	74	23.4236	0	121	0	0	0	40	130	62	11.46	201	0.097	5.59	78.4	2.45	95	1	1	1	1	0	1	0	1	0	0	0	0	0	0	1	0	1	1	1	65	44	39	42	20	0	1	0	0	0	1
9	0	0	56	23.9136	0	133	1	1	0	84	160	100	9.8	143	0.0084	5.56	12	1.39	46.1	1	1	1	0	0	1	0	1	0	0	0	0	0	0	0	1	0	0	1	60	37	34	47	33	0	1	0	0	0	0
19	1	1	68	23.4236	1	122	0	0	1	70	95	62	13.12	121	1.72	7.16	41.6	2.43	77.1	1	1	1	1	0	1	0	1	0	0	0	0	0	0	1	1	0	0	1	50	35	35	55	19	0	1	1	0	0	0
5	0	1	43	27.34	0	144	1	0	1	73	134	90	6.58	212	1.11	4.89	57	1.96	82	0	1	1	0	0	1	0	0	0	0	0	0	0	0	1	0	0	0	0	72	32	33	47	33	0	1	0	1	0	0
11	1	1	77	22.7204	1	123	1	1	1	75	135	75	4.45	145	3.56	7.31	28.3	1.73	67.7	1	1	1	1	0	1	0	1	0	0	0	0	0	0	1	0	1	0	1	54	35	38	52	19	0	1	1	0	0	0
10	1	1	83	19.03	1	96	1	0	1	66	157	73	6.16	172	16	5.27	22	2.37	99	0	1	1	1	0	1	0	1	1	0	0	0	0	0	1	0	0	0	1	61	29	27	46	22	0	1	1	0	0	0
11	0	1	65	22.6562	0	153	0	1	0	119	158	97	7.54	153	1.47	6	26.2	3.37	57	0	1	0	0	0	2	0	1	0	0	0	0	0	0	1	0	0	0	1	50	35	36	49	20	0	0	0	1	0	0
15	1	0	68	25.4767	0	113	0	0	0	70	130	80	9.06	233	7.65	6.95	53.5	3.33	60	1	1	1	1	0	1	0	1	0	0	0	0	0	0	1	0	2	0	0	39	32	40	54	18	0	1	0	0	0	0
10	1	1	60	25.0255	0	149	1	0	1	58	130	80	13.59	156	2.973	8.4	106	1.98	91	1	1	1	0	0	1	0	0	0	0	0	0	0	0	1	1	0	0	1	65	36	28	46	29	1	1	0	0	0	1
8	1	1	64	22.9481	1	128	0	0	0	80	110	60	17	216	0.248	7.07	57.5	3.64	82	1	1	1	1	0	1	1	1	0	0	0	0	0	0	1	0	1	0	1	27	34	30	56	17	0	1	0	0	0	0
10	1	1	77	27.8876	1	149	0	1	1	90	150	80	6.69	203	1	5.24	12.4	2.39	72	0	1	1	1	0	2	0	1	0	0	0	0	0	0	0	0	1	0	1	73	35	35	49	19	0	0	1	0	0	0
7	0	1	45	23.4236	1	113	0	0	0	60	94	68	8.42	253	0.126	5.05	18.5	4.05	66.6	1	1	0	0	0	1	0	0	0	0	0	0	0	0	1	0	0	0	1	52	33	39	50	19	0	1	0	0	0	1
3	1	0	52	23.4236	0	140	1	0	1	90	165	90	12.76	237	0.249	5.33	13.7	2	52.4	0	1	1	1	0	1	0	1	0	0	0	0	0	0	1	0	1	0	1	51	35	35	49	19	0	1	0	0	0	0
4	1	1	63	19.43	1	138	1	0	1	57	120	72	4.7	267	2.999	5.54	19	2.09	99	0	1	1	1	0	1	0	0	0	0	0	0	0	0	1	0	0	0	0	72	30	29	47	28	0	1	1	0	1	1
12	1	1	54	27.7344	1	150	1	0	1	65	160	100	8.14	216	0.049	18.6	21.6	1.19	80.7	1	1	1	1	0	1	1	0	0	0	0	0	0	0	1	0	1	0	1	59	33	38	44	19	0	1	0	0	0	0
22	0	1	58	24.8016	1	140	1	1	1	100	180	100	11.59	425	0.439	3.23	30.6	3.28	95	0	1	1	1	0	1	1	1	0	0	1	0	0	0	0	0	1	0	1	64	31	37	54	20	1	0	0	0	0	0
16	1	1	71	26.5731	1	149	1	0	1	65	120	70	10.75	176	2.33	6.57	60	3.21	63.6	0	1	1	1	0	2	0	1	0	0	0	0	0	0	0	0	1	0	1	41	29	37	55	18	0	1	0	0	0	0
4	1	1	78	23.4236	0	146	1	1	1	75	170	80	8.99	123	0.297	5.15	19.5	2.77	97	1	1	1	1	0	1	0	1	0	0	0	0	0	0	1	0	1	0	1	67	39	39	45	19	0	1	0	0	0	0
17	1	0	61	16.3593	0	131	1	1	1	100	170	90	11.47	126	0.216	8.19	78	0.89	63.8	0	1	1	1	0	1	0	1	0	0	0	0	0	0	2	0	3	1	1	32	40	54	58	28	0	1	0	0	0	0
9	1	1	67	25.61	1	111	0	0	0	62	155	87	3.53	130	11.028	4.34	115	1.54	92	1	1	1	1	0	1	0	1	0	0	0	0	0	0	0	0	0	0	0	64	31	33	50	33	0	1	0	0	0	0
7	0	1	60	24.2215	1	125	0	0	0	84	132	79	9.75	190	0.134	6.71	23.4	2.52	99.3	0	1	1	1	0	2	0	1	0	0	0	0	1	0	1	0	0	0	1	71	38	31	27	21	0	0	0	1	0	0
10	1	1	62	24.8016	0	135	1	0	1	55	135	80	8.58	157	0.028	7.95	50.8	3.72	63	0	1	1	1	0	2	0	0	0	0	0	0	0	0	1	0	1	0	1	58	35	31	46	18	0	1	0	0	0	1
7	0	1	67	22.2656	0	135	1	0	1	75	150	86	5.82	246	0.092	4.78	9.9	2.47	115	0	1	1	1	0	1	0	1	0	0	0	0	0	0	1	1	1	0	1	72	36	37	43	20	0	0	1	0	0	0
7	1	0	74	21.9841	0	95	1	0	0	56	110	70	8.55	206	1.815	9.95	32	1.85	59	1	1	1	0	0	1	0	0	0	0	0	0	0	0	0	1	2	1	0	38	32	33	44	24	0	1	0	0	0	1
12	1	1	60	23.4236	1	140	1	0	1	68	160	120	4.82	212	1.25	3.87	19.9	2.93	142.6	0	1	1	1	0	2	0	1	0	0	0	0	0	0	1	0	1	1	1	70	41	39	45	18	0	1	0	0	0	0
7	0	1	49	24.858	0	118	0	0	1	67	130	72	6.08	273	0.025	6.86	15.1	1.63	97	1	1	1	1	0	1	0	1	0	0	0	0	0	0	0	0	0	0	1	56	32	34	46	19	0	0	1	0	0	0
11	1	1	61	23.84	1	118	1	0	1	80	130	62	8.89	182	16	5.44	21	2.25	97	0	1	1	0	1	1	1	1	1	0	0	0	0	0	1	0	1	0	0	53	37	29	54	28	0	1	0	0	0	0
5	0	1	45	23.4236	1	179	1	0	1	70	150	90	19	154	0.724	5.09	82.2	3.9	91.9	0	1	1	1	0	1	0	1	0	0	0	0	0	0	1	0	1	0	1	54	35	35	49	19	0	1	0	0	0	0
6	0	0	80	18.67	0	99	1	0	1	79	117	71	5.26	186	1.537	4.22	50	2.38	120	0	1	1	1	0	1	0	1	0	0	0	0	0	0	1	0	0	0	0	54	33	30	49	29	0	0	0	1	0	0
7	0	1	75	19.8177	0	138	0	0	0	54	130	70	7.83	174	0.35	4.25	44.2	1.55	85.3	1	1	1	1	0	1	0	0	0	0	0	0	0	0	0	1	1	0	1	71	32	36	47	17	0	0	1	0	0	1
11	1	1	77	17.8465	0	99	1	0	1	100	112	76	8.75	211	1.11	8.35	19.9	2.78	145.1	1	1	1	1	0	3	0	0	0	0	0	0	0	0	2	1	3	0	1	40	42	40	60	17	0	1	0	0	0	0
7	0	1	64	27.78	0	151	1	0	1	72	120	80	7.48	204	11.312	7.69	45	2.55	126	1	1	1	0	1	1	1	1	0	0	1	0	0	0	1	1	0	0	0	65	35	32	50	29	0	1	0	0	0	0
4	1	1	39	32.05	1	163	1	0	1	70	120	80	9.9	295	0.001	5.78	102	2.01	94	0	1	1	1	0	1	1	1	0	0	0	0	0	0	1	0	0	0	0	54	33	30	49	29	0	1	1	0	0	0
6	0	1	56	22.0386	1	156	0	0	1	70	122	82	7.62	233	0.118	4.11	11.4	2.7	75	1	1	1	1	0	1	0	0	0	0	0	0	0	0	1	0	0	0	1	59	30	40	47	20	0	1	1	0	0	0
8	0	1	51	25.53	1	153	1	1	1	58	156	97	9.66	311	1.958	6.35	64	5.04	87	1	1	1	0	1	1	0	1	0	0	0	0	0	0	0	0	0	0	0	72	38	25	46	26	0	1	0	0	0	1
7	0	0	77	20.34	0	109	0	0	0	79	161	98	13.01	267	2.625	8.13	14	4.47	126	0	1	1	1	0	1	0	1	1	0	0	0	0	0	1	0	0	0	0	54	33	30	49	29	0	0	0	0	1	0
8	1	1	75	19.72	1	140	1	0	1	105	108	63	6.53	281	0.052	4.86	45	3.27	77	0	1	1	1	0	2	0	0	0	0	0	0	0	0	1	0	0	0	0	54	33	30	49	29	0	1	1	1	0	0
11	0	0	66	25	0	141	1	1	1	66	154	88	10.7	270	0.305	5.19	15	3.14	62	0	1	1	1	1	1	0	1	1	0	0	0	0	0	0	1	0	0	1	64	35	31	47	35	1	1	0	0	0	0
11	1	1	71	23.4236	1	144	1	0	1	90	120	80	8.58	166	2.37	7.34	10.2	2.33	107	0	1	1	1	0	2	0	1	0	0	0	0	0	0	1	0	1	0	1	53	35	35	48	19	0	1	0	0	0	0
10	0	1	75	16.53	0	103	1	0	1	76	122	66	10.76	114	15.946	6.58	100	2.09	107	0	1	1	1	1	1	0	0	0	0	0	0	0	0	1	0	0	0	0	54	33	30	49	29	0	1	0	0	0	0
5	0	1	63	22.6757	0	114	1	0	1	66	104	70	6.81	264	0.73	9.92	32.8	2.64	54	0	1	1	1	0	1	0	0	0	0	0	0	0	0	0	0	1	0	1	60	39	38	54	18	0	1	0	0	0	0
8	1	1	65	21.4533	0	126	0	0	1	70	120	80	4.83	147	0.211	4.86	23.8	3.36	75	1	1	1	1	0	1	0	1	1	0	0	0	0	0	1	1	1	0	1	51	35	35	49	19	0	1	0	0	0	0
3	1	1	59	25.7117	0	132	1	0	1	67	158	70	10.25	222	7.48	4.78	33.57	3.35	67	1	1	1	1	0	1	0	0	0	0	0	0	0	0	1	0	1	0	1	62	28	40	52	18	0	1	0	0	0	0
8	0	0	69	23.94	0	117	0	0	0	92	107	61	10.76	246	3.498	6.7	32	2.52	74	0	0	0	0	0	1	0	0	0	0	0	0	0	0	1	0	0	0	0	54	33	30	49	29	0	1	1	1	0	0
12	0	0	72	17.8571	0	101	1	0	1	62	105	65	10.29	147	1.99	5.43	15.8	2.16	55	1	1	1	1	0	3	0	0	0	0	0	0	0	0	1	1	1	0	1	45	35	35	49	19	0	1	0	0	0	0
10	1	0	68	21.91	1	103	1	0	1	92	116	80	6.45	113	3.435	8.3	22	2.01	97	0	1	1	0	1	1	1	1	0	0	0	0	0	0	2	0	0	0	0	30	38	30	55	30	1	1	0	0	0	0
5	0	1	73	23.94	0	126	0	0	0	66	170	79	5.2	131	0.036	4.43	61	2.6	82	0	1	1	1	0	4	0	1	1	1	0	0	0	0	1	0	0	0	0	54	33	30	49	29	0	0	0	0	0	0
11	0	1	86	28.125	0	133	1	0	1	70	130	80	7.02	118	0.021	6.39	9.7	2.24	147	0	1	1	1	0	1	0	1	1	0	0	0	0	0	2	0	1	0	1	30	35	35	59	19	0	1	0	1	0	0
7	0	1	66	23.94	1	126	0	0	0	78	165	71	12.65	185	0.358	11.9	22	2.84	92	0	1	1	1	0	1	0	0	0	0	0	0	1	0	1	0	0	0	0	54	33	30	49	29	0	0	0	0	0	0
10	1	1	82	19.03	1	136	1	1	1	70	140	88	9.69	164	2.361	5.1	43	3.58	127	0	1	1	1	0	1	0	0	1	0	0	0	0	0	1	1	0	3	1	56	31	44	34	38	0	1	0	0	0	0
9	1	1	81	22.8908	1	109	0	0	0	80	130	70	5.53	89	1.687	5.09	25	1.92	82	1	1	1	1	0	3	0	0	0	0	0	0	0	0	0	1	2	0	1	50	34	43	46	36	0	0	1	1	0	0
7	0	1	55	23.4236	0	144	1	0	1	80	145	80	10.81	161	1.11	6.86	31.6	1.22	80.2	1	1	1	1	0	1	0	1	0	0	0	0	0	0	1	1	0	0	1	50	37	36	51	20	0	1	0	0	0	0
7	0	0	60	25.2826	0	134	1	1	1	84	120	70	7.55	188	0.122	5.92	25.1	2.77	66	1	1	1	1	0	2	0	1	0	0	0	0	0	0	1	0	0	0	1	51	36	35	49	19	0	1	0	1	0	0
6	0	1	50	19.95	0	130	0	0	0	67	74	45	3.73	231	0.507	6.23	54	3.58	74	0	1	1	1	0	1	1	0	0	0	0	0	0	0	1	0	1	0	0	67	33	27	47	26	0	1	1	0	0	0
15	1	1	70	19.36	0	142	1	0	1	81	140	74	6.88	215	4.851	4.28	22	3.27	86	0	1	1	1	0	1	0	0	0	0	0	0	0	0	0	0	0	0	1	60	28	25	40	24	0	0	1	0	0	0
6	1	0	67	17.6693	0	121	1	0	1	83	110	80	10.73	217	0.679	11.73	37.2	3.27	69	0	1	1	1	0	3	0	0	0	0	0	0	0	0	0	1	1	0	1	51	31	33	52	16	1	1	0	0	0	0
6	0	0	62	19.7239	0	115	1	0	1	65	118	70	4.98	230	0.12	5.38	15	3.35	54	0	1	1	1	0	1	0	1	0	0	0	0	0	0	1	0	0	0	1	51	35	35	49	19	0	0	1	0	0	0
8	0	1	58	23.88	1	157	0	0	1	60	108	66	5.44	177	0.658	5.94	108	2.23	100	1	1	1	1	1	1	1	0	0	0	0	0	0	0	1	0	0	0	0	54	33	30	49	29	0	1	0	0	0	0
11	1	0	52	24.974	0	134	0	1	0	78	130	80	7.44	291	1.31	4.56	20.4	2.43	55.8	1	1	1	1	0	2	0	1	0	0	0	0	0	0	1	1	1	0	1	40	39	35	57	19	0	1	0	0	0	0
8	1	1	42	23.18	0	93	0	0	0	92	115	76	8.7	499	0.39	6.3	45	1.82	88	0	1	1	0	0	1	1	0	0	0	0	1	0	0	1	0	0	0	0	55	37	31	40	27	0	0	1	0	0	0
12	1	1	53	23.7739	1	62	0	0	0	90	125	75	9.82	209	1.128	14.15	20	2.7	172.3	0	0	1	0	0	1	1	0	0	0	0	0	0	0	1	1	1	0	0	51	32	33	47	20	0	0	0	1	0	0
18	0	0	70	24.17	0	99	1	1	1	74	199	91	12.94	277	0.64	6.9	22	2.72	65	0	1	1	1	0	3	0	1	1	0	0	1	0	0	0	2	1	1	0	44	36	36	49	26	0	1	0	1	0	0
9	1	0	76	17.7778	0	112	1	0	1	70	120	75	19.29	143	6.76	5.64	41.6	2.78	71	0	1	1	1	0	3	0	0	0	0	0	0	0	0	2	0	2	0	1	47	35	36	48	18	0	1	0	1	0	0
11	1	0	72	25.39	0	122	1	0	1	62	149	55	6.08	204	5.928	6.17	30	2.85	66	0	1	0	1	0	2	0	1	1	0	1	0	0	0	0	0	0	0	1	54	33	30	49	29	0	1	1	0	0	0
15	0	1	84	22.3081	1	95	0	0	1	110	107	64	13.27	285	1.46	13.23	8.4	2.71	190	0	1	1	1	0	3	0	1	1	0	0	1	0	0	0	1	2	0	1	29	43	32	63	16	0	0	0	0	0	0
10	1	0	74	24.2188	0	149	1	0	1	120	150	100	17.06	187	0.474	7.65	89	1.15	55	1	1	1	1	0	2	0	1	0	0	0	0	0	0	1	1	1	0	1	42	37	38	53	17	0	1	0	0	0	0
8	0	1	58	22.7732	1	128	1	0	1	76	110	85	5.71	204	0.165	5.55	46	2.68	102	1	1	1	0	1	2	0	0	0	0	0	0	0	0	2	1	1	0	1	42	35	35	49	19	0	1	0	0	0	0
13	0	0	66	23.42	0	129	1	0	1	83	143	94	10.22	227	15.215	7.17	25	1.5	82	1	1	1	1	0	1	0	1	0	0	0	0	0	0	1	0	0	0	0	54	33	30	49	29	0	1	0	0	0	0
12	1	1	68	23.0548	0	131	1	0	1	68	122	80	6.51	186	0.1464	4.66	11	3.63	72.5	1	1	1	0	0	1	1	1	0	0	1	0	0	0	0	0	0	0	0	67	25	30	48	23	1	1	1	0	0	0
12	0	0	81	24.4352	0	120	1	1	1	65	180	100	10.2	280	0.311	4.3	9.1	1.81	83	0	1	1	1	0	2	0	1	0	0	0	0	0	0	2	0	1	0	1	64	36	31	50	16	0	1	0	0	0	0
4	1	1	55	25.2259	0	159	1	0	1	82	200	135	8.54	168	0.08365	8.4	24	3.35	80.8	1	1	1	0	0	2	0	0	0	0	0	0	0	0	0	0	0	0	0	60	32	31	46	26	0	1	0	0	0	0
8	1	1	70	19.49	1	119	1	0	1	103	120	70	11.18	422	16	8.36	110	2.44	65	0	1	1	0	1	1	0	1	0	0	0	0	0	0	1	1	2	0	0	46	37	33	62	33	0	1	0	0	0	0
13	1	0	71	24.09	0	133	1	0	1	96	118	68	16.04	270	5.581	7.8	54	2.13	56	0	1	1	0	1	1	0	0	0	0	0	0	0	0	1	0	1	0	0	48	26	31	49	26	0	1	0	0	0	0
14	0	1	74	23.4236	1	116	1	0	1	78	110	78	5.67	191	0.928	4.44	17.5	2.87	92.2	1	1	1	1	0	1	0	0	0	0	0	0	0	0	1	0	1	0	1	56	33	34	51	17	0	1	1	0	0	0
7	1	1	52	29.76	0	148	1	0	1	78	149	102	12.12	161	16	17.89	28	2.53	107	1	1	1	1	0	2	1	1	0	0	0	0	0	0	1	0	0	0	1	57	35	32	47	28	1	1	0	0	0	0
9	0	0	69	15.81	0	136	0	0	1	61	108	48	17.79	797	0.295	3.91	15	2.05	64	0	1	1	1	0	1	0	1	0	0	0	0	0	0	1	0	0	0	0	54	33	30	49	29	0	1	0	0	0	0
11	1	1	60	21.4692	1	152	1	0	1	75	170	120	12.64	153	0.013	6.49	77.6	2.73	66	1	1	1	1	0	2	1	1	0	0	0	0	0	0	0	0	1	0	1	48	35	35	53	19	0	1	0	0	0	0
8	1	1	70	23.7387	0	130	1	0	1	90	120	70	6.93	155	8.6	4.99	42	2.97	70.5	1	1	1	1	0	1	0	0	0	0	0	0	0	0	1	0	2	0	1	45	35	36	54	18	0	1	0	0	0	0
8	1	1	65	23.2784	0	114	1	0	1	80	160	120	9.93	173	1.016	6.43	22	3.03	55.8	1	1	1	0	0	1	0	0	0	0	0	0	0	0	1	0	0	0	1	50	25	32	38	28	0	1	0	0	0	0
7	1	1	56	22.9637	0	132	1	0	0	82	116	80	13.23	199	0.5641	10	20	3.04	54	1	1	1	1	0	1	0	0	0	0	0	0	0	0	0	0	1	0	0	45	27	33	41	24	0	1	0	0	0	0
5	0	1	73	23.3804	0	133	1	0	0	110	120	80	9.43	187	2.49	7.97	141	3.37	50	1	1	1	0	0	2	0	0	0	0	0	0	0	0	1	1	1	0	1	40	34	45	58	44	0	1	0	1	0	0
8	0	1	71	20.03	0	117	1	0	1	70	126	74	7.37	221	2.757	4.54	18	1.46	113	0	1	1	1	1	1	0	1	0	0	0	0	0	0	1	0	1	0	0	59	32	32	45	28	0	1	0	0	0	0
6	1	0	61	23.3123	0	121	0	0	0	68	130	91	16.24	207	7.567	7.04	59	3.2	51	1	1	1	0	0	1	0	0	0	0	0	0	0	0	1	0	0	1	0	45	38	33	60	28	0	1	0	0	0	0
12	1	1	59	23.8921	0	137	1	0	1	78	120	90	7.72	139	0.01452	9.22	49	2.93	56	1	1	1	1	0	1	0	0	0	0	0	0	0	0	0	0	0	0	0	41	30	31	45	24	0	1	0	0	0	0
4	1	1	57	28.3737	1	137	0	0	1	85	130	74	10.14	206	0.11	5.53	39	3.51	85.8	0	1	1	1	0	1	0	0	0	0	0	0	0	0	0	1	0	0	1	50	36	34	46	20	0	1	0	0	0	0
8	1	1	69	25.9516	0	134	1	1	0	65	180	90	6.36	166	0.082	3.77	14.7	3.75	144.9	1	1	1	1	0	1	0	0	0	0	0	0	0	0	1	1	0	0	1	68	37	35	46	20	0	0	1	1	0	0
14	0	1	66	23.62	0	139	1	0	1	103	122	73	7.92	152	0.089	4.7	69	1.97	53	0	1	1	1	0	2	1	1	1	0	0	0	0	0	3	1	0	0	0	31	35	33	56	28	0	1	0	1	0	0
4	0	1	53	28.3447	1	151	1	0	1	70	155	110	13.43	237	2.35	5.84	29.53	2.77	84.6	0	1	1	1	0	1	0	0	0	0	0	0	0	0	0	1	0	0	1	67	27	31	40	16	0	1	0	0	0	0
14	1	1	46	23.2842	1	129	1	0	1	88	120	80	15.44	138	0.1257	8.4	31	3.89	32	1	1	1	1	0	1	0	0	0	0	0	0	0	0	2	0	1	0	0	50	30	32	48	27	1	1	0	0	0	0
9	0	1	50	25.3906	1	158	1	0	1	88	130	80	7.28	125	0.72	5.49	18.1	2.26	79	1	1	1	1	0	1	0	0	0	0	0	0	0	0	1	0	0	0	1	51	35	35	49	19	0	1	0	0	0	0
12	0	1	57	24.4898	1	169	1	1	1	98	145	100	12.33	215	1.51	19.91	38.2	0.86	85.3	1	1	1	1	0	1	0	1	0	0	0	0	0	0	1	0	0	0	1	43	37	33	49	19	0	1	0	0	0	0
10	0	0	66	22.9736	0	110	1	0	1	85	140	70	2.51	129	0.2096	14.23	9	1.87	56.2	1	1	1	1	0	1	1	1	0	0	0	0	0	0	0	0	0	0	0	58	35	28	42	24	0	1	0	1	0	0
10	1	0	70	23.4236	0	104	1	0	1	95	128	75	7.69	249	0.85	9.36	10.4	2.14	84	1	1	1	1	0	2	0	1	1	0	0	0	0	0	1	0	1	0	1	40	37	32	48	16	0	0	1	0	0	0
7	1	1	74	23.9372	1	145	1	0	1	88	140	80	7.86	191	2.778	8.6	42	4.43	92.5	1	1	1	1	0	1	0	0	0	0	0	0	0	0	1	0	1	0	0	58	27	29	42	28	0	1	0	0	0	0
7	0	0	67	22.6	1	113	1	0	1	76	140	70	8.28	248	2.157	4.94	21	3.76	76	0	1	1	1	0	1	0	1	1	0	0	0	0	0	0	0	0	0	1	71	29	30	43	30	1	1	0	0	0	0
5	0	1	69	21.26	1	132	1	0	1	70	130	70	5.16	231	0.461	5.47	24	3.78	113	0	1	1	0	1	1	1	0	0	0	0	0	0	0	0	0	0	0	1	65	31	27	45	27	0	1	0	0	0	0
4	0	1	86	19.3698	0	115	0	0	1	70	88	55	13.06	218	0.119	6.76	18.01	1.97	122.2	0	1	1	1	0	1	0	0	0	0	0	0	0	0	1	0	1	0	1	51	35	35	49	19	0	1	0	0	0	0
5	1	1	72	22.99	1	148	1	1	0	69	166	92	7.7	268	0.724	4.3	45	2.75	117	0	1	1	1	0	1	0	1	0	0	0	0	0	0	0	0	0	0	0	63	31	33	46	31	0	1	0	0	0	0
10	1	1	76	18.0994	1	124	1	0	1	77	128	68	6.54	162	8.76	6.95	48.6	3.28	86.7	1	1	1	1	0	1	0	0	0	0	0	0	0	0	1	0	1	0	1	38	35	34	45	18	0	1	0	0	0	0
6	1	1	55	28.67	1	163	1	1	1	76	120	80	12.44	228	1.573	4.48	60	2.59	96	1	1	1	1	0	1	0	1	0	0	0	0	0	0	0	0	0	0	1	75	33	30	51	28	0	1	0	0	0	0
10	1	1	63	26.4	1	146	1	0	1	77	130	70	11.38	195	0.001	6	6	2.57	118	0	1	1	1	0	1	0	0	0	0	0	0	0	0	1	1	3	0	0	41	35	44	62	38	0	1	1	0	0	0
11	0	1	70	25.71	1	117	0	0	0	88	105	75	6.65	193	0.034	6.57	29	2.4	131	0	1	1	1	0	1	0	0	0	0	0	0	1	0	1	1	0	0	0	25	41	35	60	32	0	0	1	1	0	0
9	0	1	82	21.4533	1	91	1	0	1	98	138	86	5.38	236	1.84	5.34	10.1	4.07	171.9	0	1	1	1	0	2	0	1	0	0	0	0	0	0	1	0	1	0	1	51	35	35	49	19	0	0	1	1	0	0
11	1	1	65	21.2585	0	143	1	0	1	56	130	70	13.65	204	0.037	6.8	32.4	1.66	102.7	0	1	1	1	0	1	0	1	0	0	0	0	0	0	1	0	0	0	1	56	35	34	45	17	0	1	0	0	0	1
7	1	1	81	23.4236	0	147	1	0	1	65	120	70	13.3	158	3.22	7.51	35.4	2.71	68.6	1	1	1	1	0	2	0	0	0	0	0	0	0	0	1	1	1	1	1	40	39	39	50	19	0	1	0	0	0	0
4	1	1	69	23.4236	1	111	1	0	0	98	165	80	6.43	269	0.76	4.76	76.7	2	85	0	1	1	1	0	2	0	1	0	0	0	0	0	0	1	0	1	1	0	51	36	33	53	18	0	1	1	0	0	0
10	1	1	47	23.4236	0	157	1	0	1	68	150	110	10.95	210	0.046	4.97	82.8	2.09	83.5	1	1	1	1	0	1	0	0	0	0	0	0	0	0	1	0	1	0	1	50	35	35	49	19	0	1	0	0	0	0
8	1	1	62	24.98	1	155	1	1	1	95	135	90	13.29	233	15.134	10.18	45	3.38	74	1	1	1	0	1	1	0	0	0	0	0	0	0	0	0	1	0	1	0	49	32	34	57	34	0	0	1	0	0	0
6	1	1	60	23.8754	1	131	1	0	1	79	112	80	5.25	200	0.393	14.45	30.9	2.45	75.4	1	1	1	1	0	1	1	0	0	0	0	0	0	0	1	0	1	0	1	53	41	37	54	16	0	1	0	0	0	0
10	1	1	51	24.4451	1	142	1	0	0	114	110	80	13.06	153	0.981	8.4	45	2.26	67	1	1	1	1	0	1	0	0	0	0	0	0	0	0	1	0	0	0	0	36	31	31	41	23	0	1	1	0	0	0
13	1	0	72	20.678	0	127	1	0	1	95	150	100	8.91	238	0.902	12.75	22.4	2.72	53	1	1	1	1	0	2	0	0	0	0	0	0	0	0	1	0	1	1	1	68	36	36	48	17	0	1	1	0	0	0
5	1	1	65	27.9431	0	144	1	0	1	89	132	77	18.21	196	2.03	6.58	23.6	2.44	78	0	1	1	1	0	1	1	1	0	0	0	0	0	0	1	0	1	0	1	40	35	35	48	19	0	1	0	0	0	0
10	0	1	73	23.1834	1	145	1	0	1	82	165	92	10.82	250	1.6	4.85	19	3.64	146	1	1	1	1	0	1	0	0	0	0	0	0	0	0	0	1	0	0	1	60	31	38	52	20	0	0	0	0	0	0
7	0	0	62	27.34	0	139	1	1	1	76	156	116	5.8	296	1.32	4.99	39	2.98	74	1	1	1	1	0	1	0	1	1	0	0	0	0	0	1	0	0	0	0	69	37	31	52	30	0	1	1	0	0	0
9	0	0	57	27.22	0	128	1	0	1	100	146	88	9.55	257	0.125	4.1	17	2.43	61	1	1	1	0	1	1	0	1	0	0	0	0	0	0	0	0	0	0	0	64	30	30	42	30	0	1	0	0	0	0
11	0	0	69	21.1	0	109	1	0	1	70	120	80	18.73	191	0.093	4.78	97	1.07	76	0	1	1	1	0	1	0	1	0	1	0	0	0	0	1	1	0	0	0	41	37	32	60	28	0	0	0	1	0	0
9	1	1	34	20.7967	1	107	0	0	0	50	90	60	14.34	265	10	7.14	41.6	1.92	87	1	1	1	1	0	4	0	0	0	1	0	0	0	0	0	0	1	0	1	41	28	38	43	18	0	1	0	0	0	1
15	1	1	68	18.0697	1	136	1	0	0	62	170	90	4.41	179	0.022	4.41	7.3	1.14	81	1	1	0	0	0	4	0	1	0	0	0	0	0	0	2	1	1	0	1	42	35	35	63	19	0	0	1	1	1	0
11	1	0	62	20.4491	0	110	1	0	0	54	120	74	6.83	126	0.356	5.41	50	1.89	61.9	0	1	1	1	0	1	0	1	0	0	0	0	1	0	1	0	0	0	1	58	35	35	49	19	0	1	0	0	0	1
12	1	1	51	25.47	1	144	0	0	1	86	82	62	19.43	187	11.582	6.83	69	3.11	133	0	1	1	1	0	4	0	0	0	1	0	0	0	0	0	1	1	0	0	49	41	36	51	36	0	1	1	0	0	0
11	1	1	81	22.4913	0	134	1	0	1	74	138	70	8.93	152	4.9	6.56	41.4	2.07	76.4	0	1	1	1	0	2	0	0	0	0	0	0	0	0	1	0	1	0	1	51	35	35	49	19	0	1	0	0	0	0
6	1	0	64	23.4236	0	122	1	0	1	90	130	70	11.08	294	2.57	16.45	26.8	2.32	80.6	1	1	1	1	0	1	1	0	0	0	0	0	0	0	1	0	1	0	1	60	27	30	44	17	0	1	0	0	0	0
14	1	1	67	21.59	1	128	1	0	0	82	140	78	9.36	193	12.095	6.9	95	1.9	64	1	1	1	0	1	2	0	0	0	0	0	0	0	0	0	0	0	0	0	46	25	26	48	28	0	1	0	0	0	0
10	1	1	45	21.86	0	128	1	0	1	70	145	90	9.43	293	0.903	6.2	29	1.24	62	1	1	1	1	0	1	0	1	0	0	0	0	0	0	0	0	0	0	0	65	28	33	49	32	0	1	0	0	0	0
4	0	0	81	27.89	0	130	1	0	1	85	124	76	9.48	212	2.576	4.46	31	3.26	62	0	1	1	1	0	3	0	0	0	0	0	0	0	0	1	3	2	1	0	47	24	27	44	28	0	1	0	0	0	0
6	1	1	36	23.84	0	142	0	0	1	61	101	67	2.28	132	16	6.7	29	2.12	71	0	1	1	1	0	1	0	0	0	0	0	0	0	0	0	0	1	0	1	51	30	35	54	32	0	0	1	0	0	0
7	0	1	83	21.77	0	130	1	0	1	100	149	66	7.17	121	0.26	6.7	45	2.52	88	0	1	1	1	0	2	0	0	0	0	0	0	1	0	1	0	0	0	0	54	33	30	49	29	0	0	0	1	0	0
11	1	1	43	23.333	0	119	1	0	1	60	100	60	6.35	209	5.777	9.53	71	1.88	78.2	1	1	1	1	0	1	0	0	0	0	0	0	0	0	0	0	1	0	0	44	32	27	52	24	0	1	0	0	0	0
16	1	0	62	19.7239	0	109	1	0	1	85	108	78	8.31	176	7.71	6.86	12.9	1.65	69	0	1	1	1	0	2	0	1	0	0	0	0	0	0	1	0	1	0	1	34	40	30	52	16	0	1	0	0	0	0
10	1	1	46	21.2585	1	145	1	0	1	76	160	110	14.96	225	0.11	4.22	41.6	3.89	85.3	1	1	1	0	1	2	0	0	0	0	0	0	0	0	2	1	1	0	0	42	37	35	48	19	0	1	0	0	0	0
8	0	1	69	25.5102	0	141	1	1	1	106	190	102	7.37	216	0.05	5.61	53.4	3.12	95.2	0	1	1	1	0	1	0	1	1	0	0	0	1	0	2	0	0	0	1	51	35	35	49	19	0	0	1	0	0	0
12	1	1	79	23.4236	0	102	1	0	1	105	105	65	14.58	148	6.51	6.92	21.7	2.82	144	0	1	1	1	0	3	0	1	0	0	0	0	0	0	2	0	1	0	1	55	38	37	55	20	0	1	0	0	0	0
11	0	1	63	21.2585	1	140	0	0	1	70	120	80	4.73	164	0.256	4.48	10.8	2.69	72	1	1	1	1	0	1	0	0	0	0	0	0	0	0	0	0	0	0	0	60	25	31	50	18	0	0	1	1	0	0
9	0	1	63	23.15	1	143	1	0	1	82	142	97	11.79	252	4.327	3.59	17	2.97	116	0	1	1	1	0	1	0	1	0	0	0	0	0	0	1	0	0	0	0	54	33	30	49	29	0	1	0	0	0	0
10	1	0	69	22.03	0	125	0	0	1	54	90	56	10.92	216	0.18	5.1	28	2.52	64	1	1	1	1	1	1	0	0	0	0	0	0	0	0	1	1	1	0	0	47	33	30	51	30	0	1	0	0	0	1
28	0	0	75	25.91	0	100	1	1	0	82	177	85	7.3	166	9.709	7.22	7	1.67	200	1	1	1	1	0	3	1	1	0	0	0	0	1	0	0	0	0	0	0	70	34	30	43	33	0	0	1	1	0	0
4	0	1	71	23.4236	1	116	1	0	1	72	110	60	8.43	208	2.11	7.27	29.5	2.55	78	0	1	1	1	0	1	0	1	0	0	0	0	0	0	0	1	0	0	1	50	34	35	49	19	0	1	0	0	0	0
15	1	1	77	23.4236	1	141	1	0	0	135	140	100	15.92	216	3.14	15.83	59.9	2.63	127	1	1	1	1	0	4	1	0	1	0	0	0	0	0	1	1	0	0	1	16	42	35	60	17	0	0	0	1	0	0
9	0	1	60	19.9184	1	152	1	1	1	71	188	98	9.24	160	6.14	4.47	59.5	1.94	85.8	1	1	1	1	0	1	0	1	0	0	0	0	0	0	1	0	0	0	1	44	27	36	49	18	0	1	1	0	0	0
8	1	0	79	22.66	0	108	1	1	0	48	133	73	6.17	182	0.782	6.35	218	2.81	147	0	1	1	1	0	2	1	1	1	0	0	0	0	0	0	0	0	1	0	59	31	32	55	31	0	0	1	0	0	1
11	1	1	79	20.202	0	110	1	1	1	65	125	80	6.89	109	7.47	4.88	47.9	2.89	89.3	1	1	1	1	0	2	0	1	1	0	0	0	0	0	1	1	1	0	1	50	34	35	47	20	0	1	0	0	0	0
8	1	1	81	25.89	1	130	0	0	1	92	144	93	9.59	268	2.4	14.01	93	1.76	102	1	1	1	1	0	2	0	1	0	0	0	0	0	0	0	0	2	0	0	35	35	35	55	32	0	0	1	0	0	0
7	1	1	26	24.49	0	123	0	0	0	88	100	58	9.52	168	6.843	6.33	10	4.61	77	0	1	1	1	1	1	0	0	0	0	0	0	0	0	1	0	0	0	0	47	36	45	38	36	0	0	1	0	0	0
13	1	1	64	24.2215	0	135	1	0	1	92	120	80	6.16	146	0.557	6.15	38.7	1.29	67	1	1	1	1	0	1	0	0	0	0	0	0	0	0	1	1	1	0	1	51	35	35	49	19	0	1	0	0	0	0
11	1	1	44	24.9147	1	136	1	1	1	80	140	110	6.59	202	0.8333	6.9	36	2.97	91	1	1	1	1	0	1	0	1	0	0	0	0	0	0	1	0	1	0	1	64	35	29	46	30	0	1	1	0	0	0
15	0	0	69	23.151	0	134	1	0	0	82	140	100	5.85	179	0.7856	9.82	33	3.86	63	1	1	1	1	0	1	1	1	0	0	0	0	0	0	1	0	1	0	0	50	29	29	45	25	1	1	1	1	0	0
18	1	1	83	23.1684	0	88	1	0	0	50	121	60	5.69	123	1.676	7.29	35	3.4	121	0	1	1	1	0	1	0	0	0	0	0	0	0	0	1	1	1	0	1	49	35	32	58	31	0	1	0	0	0	1
12	1	1	69	23.5893	1	107	1	0	1	88	120	70	7.67	198	7.118	6.48	30	3.8	84	1	1	1	0	0	1	0	0	0	0	0	0	0	0	1	1	1	0	1	46	39	31	51	28	1	1	0	0	0	0
13	1	1	61	26.079	0	156	1	1	0	80	125	78	4.89	148	0.161	4.45	17.3	3.2	97	1	1	1	1	0	1	0	0	0	0	0	0	0	0	1	2	1	0	1	63	32	35	49	19	0	1	0	0	0	0
10	1	0	76	22.4378	0	125	1	0	1	62	98	62	10.3	225	0.2176	8.4	16	3.66	80.8	0	1	1	0	0	1	0	0	0	0	0	0	0	0	2	1	1	1	0	44	40	28	55	26	0	1	0	0	0	0
7	0	0	56	30.43	0	156	1	0	1	88	153	102	6.55	251	1.802	7.3	80	3.67	75	1	1	1	0	1	2	0	1	1	0	0	0	0	0	0	0	0	0	0	67	29	29	43	29	0	0	1	0	0	0
8	1	1	60	27.92	1	161	0	0	1	72	130	70	7.73	204	0.001	4.68	23	2.61	71	1	1	1	0	1	1	1	0	0	0	0	0	0	0	1	0	1	0	0	32	43	34	72	32	0	0	1	0	0	0
20	1	1	85	23.0822	1	119	0	0	1	68	100	60	9.55	188	3.293	8.41	28	1.08	83	1	1	1	1	0	1	0	1	0	0	0	0	0	0	2	2	2	1	1	45	35	38	54	31	0	1	0	0	0	0
25	1	1	77	23.8576	0	99	1	0	1	107	154	94	10.95	212	3.182	8.4	41	2.31	107.1	1	1	1	0	0	1	0	0	0	0	0	0	1	0	1	1	1	1	0	36	42	35	64	30	1	1	0	0	0	0
11	1	1	45	24.8	0	156	1	0	1	72	114	82	14.62	255	16	18.47	45	4.09	70	1	1	1	1	0	1	1	0	1	0	0	0	0	0	0	0	0	0	0	60	40	27	52	27	0	1	0	0	0	0
11	0	0	76	22.8046	0	115	1	1	1	87	155	80	6.94	119	0.02587	7.38	39.14	1.57	92	0	1	1	1	0	1	0	0	0	0	0	0	1	0	1	1	1	1	0	58	28	29	41	25	0	1	0	0	0	0
10	0	1	47	30.45	0	147	1	0	1	74	110	70	13.46	213	7.754	6.48	58	2.3	86	0	1	1	0	1	1	0	0	0	0	0	0	0	0	0	0	1	0	1	70	28	29	49	28	0	1	1	0	0	0
6	1	1	59	23.4236	1	141	0	0	0	55	100	60	11.85	241	0.077	5.54	16.9	2.63	100	1	1	1	1	0	1	0	1	0	0	0	0	0	0	1	0	1	0	1	70	33	36	45	20	0	0	1	0	0	1
14	1	0	74	27.12	0	129	1	0	1	81	111	75	10.27	225	1.963	7.72	103	2.86	76	0	1	1	0	1	2	0	1	0	0	0	0	0	0	3	1	2	1	0	49	44	31	53	30	0	1	0	0	0	0
8	1	1	78	20.3125	1	132	1	0	1	52	130	70	5.73	235	0.051	6.03	43.5	2.81	106.6	1	1	1	1	0	2	0	0	0	0	0	0	0	0	2	1	2	0	1	60	38	50	47	18	0	1	0	0	0	1
8	1	0	76	21.64	0	118	0	0	0	70	133	82	5.86	259	5.331	5.64	27	3.69	86	1	1	1	1	0	1	0	1	0	0	0	0	0	0	0	0	0	0	1	54	33	30	49	29	0	1	0	0	0	0
8	1	0	72	27.5482	1	124	1	0	1	62	105	60	8.8	217	0.073	4.56	91	2.73	75.6	1	1	1	1	0	2	1	1	0	0	0	0	0	1	1	0	0	0	1	42	35	35	50	19	0	1	0	0	0	0
10	1	1	52	21.77	1	165	1	0	1	64	106	60	13.15	202	16	4.28	63	3.48	76	1	1	1	0	1	1	0	1	0	0	0	0	0	0	1	0	1	0	1	63	32	29	48	25	0	1	0	0	0	0
4	1	0	57	28.04	0	103	0	0	0	82	74	48	13.29	211	3.301	8.4	30	2.52	75	0	0	0	0	0	4	0	0	0	0	0	0	0	0	0	0	0	0	0	36	22	26	38	29	0	0	1	1	0	0
6	1	1	66	25.77	0	155	1	0	1	91	150	84	10.68	169	9.421	6.36	35	3.08	81	1	1	1	0	1	1	0	1	0	0	0	0	0	0	0	0	0	0	1	59	31	28	45	23	0	1	0	0	0	0
13	1	1	76	23.0935	1	105	1	1	1	86	120	70	7.35	181	0.2761	6.63	14	2.25	109.2	1	1	1	1	0	1	0	1	1	0	0	0	1	0	2	1	1	1	0	46	35	29	47	25	0	1	0	0	0	0
7	1	1	59	24.34	0	142	1	0	1	68	158	72	6.99	213	0.472	9.42	60	2.48	115	0	1	1	0	1	1	1	1	0	0	0	0	0	0	0	0	1	0	1	57	39	28	49	26	0	1	0	0	0	0
5	1	1	72	20.96	1	132	0	0	1	70	109	69	6.3	123	15.628	5.2	43	2.52	55	0	1	1	1	0	1	0	1	0	0	0	0	0	0	1	0	0	0	0	54	33	30	49	29	1	1	0	0	0	0
21	1	1	74	27.55	1	117	1	1	1	78	142	82	8	181	9.993	5.68	41	4.28	123	1	1	1	1	0	2	0	1	0	0	0	0	0	0	1	1	0	0	0	47	36	26	59	26	0	0	1	1	0	0
9	0	0	45	19.97	0	135	1	0	1	74	108	80	17.11	199	2.481	4.25	62	1.89	75	1	1	1	0	1	2	0	0	0	0	0	0	0	0	2	0	2	1	0	26	40	34	65	32	0	0	0	0	0	0
13	0	1	76	23.7015	0	118	0	0	1	75	120	70	14.98	154	3.605	5.92	143	2.82	74	1	1	1	1	0	2	0	0	0	0	0	0	0	0	2	1	2	1	1	52	36	39	50	38	0	1	0	0	0	0
15	0	1	51	27.9155	1	157	1	0	1	74	140	100	5.32	161	0.052	10.29	28	0.86	83	1	1	1	1	0	1	0	1	0	0	0	0	0	0	1	0	0	0	1	64	32	33	44	16	0	1	0	0	0	0
5	1	1	45	25.85	1	160	1	1	1	72	140	100	11.21	267	11.617	5.89	105	3.03	69	1	1	1	0	1	1	0	1	0	0	0	0	0	0	0	0	0	0	1	76	29	29	41	27	0	1	0	0	0	0
6	0	1	71	25.7812	0	95	1	1	0	80	120	80	5.97	160	10	5.35	60	3.54	232	0	1	1	1	0	1	0	1	0	0	0	0	0	0	2	1	2	0	1	23	42	46	67	19	0	0	1	1	0	0
9	0	0	58	24.315	0	118	1	1	1	78	120	80	5.83	243	0.162	5.9	33.9	2.3	61	1	1	1	0	1	1	0	1	0	0	0	0	0	0	1	1	0	0	0	60	28	28	43	15	0	1	0	0	0	0
3	0	1	50	31.48	0	150	1	0	1	97	145	97	8.49	142	8.578	7.37	70	1	104	0	1	1	1	0	1	1	1	0	0	0	0	0	0	0	0	0	0	0	40	33	31	63	27	0	1	0	0	0	0
6	0	0	70	24.97	1	98	0	0	1	81	100	65	5.59	244	3.07	6.44	47	2.11	88	0	1	1	1	0	3	0	0	0	0	0	0	0	0	2	1	1	0	0	48	40	30	57	29	1	1	0	0	0	0
5	1	1	50	23.198	0	131	0	0	1	70	92	60	5.39	203	1.222	4.6	50	1.82	67.1	0	1	1	1	0	1	0	0	0	0	0	0	0	0	1	1	1	0	1	56	30	34	46	30	0	1	1	0	0	0
6	0	1	82	17.72	1	109	0	1	0	67	179	80	5.34	201	0.082	4.61	59	2.52	235	0	1	1	1	0	1	0	1	0	0	0	0	0	0	1	0	0	0	0	54	33	30	49	29	0	1	0	1	0	0
10	0	1	50	22.6905	0	122	0	0	0	56	110	70	8.42	218	0.1255	5.91	19	4.69	83.8	1	1	1	1	0	1	0	0	0	0	0	0	0	0	1	1	1	0	1	56	28	33	40	29	1	1	0	0	0	1
12	1	1	59	17.2462	1	127	1	0	0	90	130	90	6.05	181	0.024	5.08	17.8	2.03	81	1	1	1	1	0	1	0	1	0	0	0	0	0	0	1	0	1	0	1	45	27	33	40	19	0	1	0	0	0	0
6	0	1	48	24.8	1	170	0	1	1	92	175	115	11.13	153	3.93	4.52	33	2.94	195	0	1	1	1	0	1	0	1	1	0	0	0	0	0	0	1	1	0	0	66	27	31	39	27	0	0	1	0	0	0
16	1	0	71	26.67	1	117	1	0	1	80	102	55	10.01	211	4.294	5.25	26	2.7	51	1	1	1	0	1	1	0	0	0	0	0	0	0	0	0	1	0	1	0	41	29	27	41	25	0	1	0	0	0	0
10	1	1	53	23.6117	1	84	1	0	1	81	120	85	9.14	159	0.5804	8.4	19	2.91	50	0	1	1	0	0	1	0	0	0	0	0	0	0	0	0	0	1	0	0	56	30	29	44	25	0	1	1	0	0	0
9	0	0	75	23.4236	0	91	0	0	0	70	135	60	6.91	199	0.562	5.83	318.9	1.54	120.5	0	1	1	1	0	3	0	1	0	0	0	0	0	0	1	1	1	0	0	63	35	33	45	16	0	0	0	0	0	0
8	1	0	71	22.48	0	110	1	0	1	64	122	70	8.56	307	0.125	4.15	36	2.37	112	1	1	1	1	0	1	0	1	0	0	0	0	0	0	1	1	0	0	1	72	29	28	44	28	0	1	0	0	0	0
13	1	1	51	26.7036	0	144	1	0	1	70	104	62	14.98	130	10	13.92	75.4	0.55	90	1	1	1	1	0	1	1	0	0	0	0	0	0	0	1	1	1	0	1	42	35	35	48	19	0	1	0	0	0	0
3	1	1	75	20.29	0	123	1	0	1	67	120	60	5.14	138	0.155	5.95	37	1.64	88	1	1	1	0	1	1	1	1	0	0	0	0	0	0	0	0	0	1	1	63	32	29	44	31	0	1	1	0	0	0
14	1	1	60	25.01	0	152	0	0	0	122	166	104	19.23	144	15.662	9.77	258	1.37	104	1	1	1	0	1	4	0	0	0	0	0	0	0	1	0	0	0	0	0	58	38	28	48	22	0	1	0	0	1	0
7	1	1	57	23.5673	0	118	0	0	1	74	120	80	13.94	172	0.00592	7.11	11	2.79	89.1	1	1	1	1	0	1	0	0	0	0	0	0	0	0	1	0	2	1	0	57	30	32	45	26	0	1	0	0	0	0
6	1	1	85	23.4236	1	140	0	0	0	83	170	90	19.44	143	7.03	5.81	25.8	1.52	144	1	1	1	1	0	4	0	1	0	0	0	0	1	0	2	1	1	0	0	55	35	35	50	19	0	1	0	0	0	0
9	1	0	74	22.22	0	109	1	0	1	71	150	110	11.12	246	7.62	5.73	61	3.59	67	1	1	1	0	1	1	0	0	0	0	0	0	0	0	0	1	1	0	0	38	37	25	53	26	0	1	0	0	0	0
8	1	0	85	25.3	0	117	0	0	1	64	112	62	8.4	194	16	6.8	20	2.76	93	0	1	1	0	1	2	0	0	0	0	0	0	0	0	1	1	0	0	1	71	30	25	40	24	0	1	0	0	0	0
19	1	0	74	28.1479	0	115	1	1	1	104	160	100	9.05	151	1.89	7.21	129.4	3.41	67.8	0	1	1	1	0	2	0	0	0	0	0	0	0	0	2	1	1	0	1	42	36	39	52	17	0	0	1	1	0	0
10	1	1	84	23.66	0	108	1	0	0	63	98	57	6.08	117	1.823	6.12	21	2	98	1	1	1	1	1	1	0	0	0	0	0	0	0	0	1	0	0	0	0	54	33	30	49	29	0	1	0	0	0	0
12	1	1	44	26.0276	0	144	1	0	1	95	125	70	13.67	187	0.036	7.9	100.1	2.77	107	1	1	1	1	0	1	1	1	0	0	0	0	0	0	1	1	1	0	1	42	41	35	55	20	0	1	0	0	0	0
11	0	1	58	26.1719	1	137	1	0	1	78	130	76	7.02	128	0.262	5.5	16.5	2.7	77.6	0	1	1	1	0	2	0	1	0	0	0	0	0	0	1	1	1	0	1	71	35	33	52	17	0	1	0	0	0	0
14	0	0	48	21.4844	0	146	0	0	0	82	110	70	11.65	264	0.012	9.72	41.6	0.82	74	0	1	1	1	0	1	0	0	0	0	0	0	0	0	1	0	0	0	1	46	33	31	46	13	0	1	0	0	0	0
4	1	1	52	25.86	1	141	1	0	1	67	120	80	5.55	177	0.312	17.47	41	2.55	73	1	1	1	1	0	1	1	1	0	0	0	0	0	0	1	0	0	0	0	54	33	30	49	29	0	1	0	0	0	0
9	0	0	68	23.8281	0	141	1	1	1	100	160	90	7.96	263	0.014	6.74	41.6	1.55	68.4	1	1	1	1	0	1	1	1	0	0	1	0	0	0	1	1	1	0	1	64	35	35	45	19	0	1	0	0	0	0
9	1	1	63	25.6544	0	158	1	0	1	76	130	80	7.46	287	0.469	3.8	69.3	3.33	76.1	1	1	1	1	0	1	0	0	0	0	0	0	0	0	0	0	1	0	1	60	31	30	42	18	0	1	1	0	0	0
7	1	1	42	23.4048	1	118	1	0	0	72	104	60	11.3	271	1.594	7.01	34	4.39	92	1	1	1	1	0	1	0	0	0	0	0	0	0	0	1	0	1	0	0	62	28	30	47	27	0	0	1	0	0	0
11	1	0	73	26.0375	0	134	1	0	1	62	140	70	5.84	195	0.322	4.55	41.6	3.08	75	1	1	1	1	0	1	1	0	0	0	0	0	0	0	1	0	1	0	1	79	35	35	49	19	0	1	0	0	0	0
8	0	0	71	22.0317	1	122	0	0	0	92	130	90	12.77	263	1.71	17.86	18.1	3.87	55	0	1	1	1	0	3	1	0	0	0	0	0	0	0	1	0	1	0	1	62	40	35	49	19	0	0	1	1	0	0
8	0	1	77	26.5731	0	140	1	1	1	60	114	68	5.31	121	1.46	4.65	19.4	2.12	78	0	1	1	1	0	1	0	1	0	0	0	0	1	0	1	0	0	0	1	57	32	34	46	20	0	1	0	1	0	0
11	0	1	45	26.9896	1	153	1	1	1	76	170	90	11.1	241	0.053	4.24	57.9	3.03	58	1	1	1	1	0	1	0	1	0	0	0	0	0	0	1	0	1	0	0	71	35	35	49	19	0	0	1	0	0	0
16	0	1	76	21.3039	1	125	1	1	1	60	120	70	6.95	215	0.255	4.83	17.7	1.42	106	1	1	0	1	0	1	0	1	1	0	0	0	0	0	1	1	1	0	1	59	35	35	46	19	0	1	0	0	0	0
14	1	0	67	20.8117	1	112	1	0	1	76	160	105	9.94	148	0.027	7.38	31.9	2.8	60.5	1	1	1	1	0	2	0	1	0	0	0	0	0	0	1	1	2	0	1	45	33	35	48	19	0	1	0	0	0	0
12	0	1	61	25.7117	1	141	1	1	0	60	200	100	6.38	127	0.016	5.09	48.8	2.25	89	1	1	1	0	0	1	0	1	0	0	0	0	0	0	0	0	0	0	1	51	35	35	49	19	0	1	0	0	0	0
8	1	0	71	23.725	0	138	1	0	1	88	170	90	10.32	214	0.1264	6.86	20	3.26	45.1	1	1	1	1	0	1	1	1	0	0	0	0	0	0	1	1	1	0	1	48	33	30	49	23	0	1	1	0	0	0
9	1	1	50	19.8413	1	140	0	0	0	50	95	60	12.01	315	1.21	6.21	16.7	3.9	86.9	1	1	1	1	0	1	0	1	0	0	0	0	0	0	2	0	1	0	0	59	35	35	49	19	0	1	0	0	0	1
5	0	0	58	22.97	0	144	1	0	1	60	140	86	5.24	129	1.34	5.76	39	2.2	56	1	1	1	1	0	1	0	1	0	0	0	0	0	0	0	1	0	0	0	70	31	29	45	26	0	1	0	0	0	0
10	1	1	52	30.19	1	154	1	0	1	75	119	64	16.05	257	12.088	6.56	119	3.33	92	1	1	1	1	0	1	0	1	0	0	0	0	0	0	1	0	0	0	0	64	36	31	49	33	0	1	0	0	0	0
13	0	1	69	22.6741	1	117	1	0	1	88	100	70	8.63	157	0.2177	7.83	18	1.71	107.9	1	1	1	1	0	1	0	0	0	0	0	0	0	0	1	1	1	1	1	40	32	32	40	27	1	0	1	1	0	0
8	1	1	59	23.5835	0	140	1	0	1	66	110	70	8.58	157	0.07381	11.46	18	2.45	99.6	1	1	1	1	0	1	1	0	0	0	0	0	0	0	0	0	1	0	1	56	27	27	41	26	0	1	0	0	0	0
12	1	1	58	23.4236	1	150	1	0	1	78	170	115	9.99	267	1.44	7.89	50.7	2.31	77	1	1	1	1	0	1	0	0	0	0	0	0	0	0	1	0	0	0	1	75	29	32	44	20	0	0	1	1	0	0
8	0	0	52	20.1951	0	125	1	0	1	70	140	80	5.9	126	0.316	12.07	12.8	1.98	53.7	1	1	1	1	0	1	0	0	0	0	0	0	0	0	1	0	1	0	1	55	29	29	42	16	0	0	1	0	0	0
10	1	1	44	23.8934	0	131	1	0	1	66	143	77	10.51	178	2.287	8.4	95	3.19	71	1	1	1	1	0	1	0	0	0	0	0	0	0	0	1	1	1	0	1	50	30	36	53	26	0	1	0	0	0	0
10	1	1	69	25.7117	1	137	1	0	1	80	110	80	8.26	198	0.874	6.54	27.2	2.57	53	1	1	1	1	0	2	0	0	0	0	0	0	0	0	0	0	1	0	1	60	39	33	46	20	0	0	0	0	0	0
5	0	1	76	22.7194	0	127	1	0	1	77	160	60	7.45	167	0.08991	5.71	16	3.62	65	0	1	1	1	0	1	0	0	0	0	0	0	0	0	1	1	1	0	0	56	28	32	48	30	0	1	0	0	0	0
9	1	0	71	23.94	0	133	0	1	0	94	188	104	16.93	213	0.009	11.25	39	3.13	89	0	0	1	1	0	3	0	1	0	0	0	0	0	0	1	0	0	0	0	54	33	30	49	29	0	0	0	0	1	0
6	1	1	65	22.7732	1	114	1	0	1	70	123	78	8.03	282	0.257	3.89	25.8	1.44	65	1	1	1	1	0	1	0	1	0	0	0	0	0	0	1	1	1	0	1	40	35	36	56	15	0	1	0	0	0	0
13	1	1	37	26.8274	1	145	1	0	1	78	130	90	9.78	226	2.13	8.23	41.9	1.88	78.2	1	1	1	1	0	1	0	0	0	0	0	0	0	0	1	1	1	0	1	62	29	28	49	18	0	1	0	0	0	0
4	1	1	67	24.8	1	106	1	0	1	82	139	86	8.32	168	16	5.44	40	1.85	105	1	1	1	1	0	1	0	1	0	0	0	0	0	0	0	0	0	0	0	67	30	28	49	23	0	1	0	0	0	0
3	0	1	63	30.48	0	128	0	1	0	70	120	80	12	57	0.553	6.79	32	2.54	166	0	1	1	1	0	3	0	0	0	0	0	0	1	0	1	0	0	0	0	54	33	30	49	29	0	1	0	1	0	0
6	1	1	80	23.6086	1	135	0	0	1	50	100	60	13.01	112	2.693	6.85	61	1.55	215.1	0	1	1	0	0	1	0	1	0	0	0	0	0	0	1	0	2	0	1	64	37	31	46	34	0	1	1	0	0	1
11	1	1	70	20.9572	0	127	0	0	0	38	110	70	13.2	173	10	8.88	102.4	0.7	132	1	1	1	1	0	4	0	1	0	1	0	0	0	1	1	0	1	0	1	51	35	35	49	19	0	1	0	0	0	1
9	1	1	74	27.5556	1	134	1	0	1	78	130	72	9.84	156	0.801	4.45	25.2	1.78	65	1	1	1	1	0	2	1	1	1	0	0	0	0	0	1	0	1	0	1	51	37	35	49	19	0	1	1	0	0	0
10	1	1	77	22.1797	0	121	1	0	1	75	120	80	5.06	114	0.1212	8.4	18	2.09	79.9	1	1	1	0	0	1	0	0	0	0	0	0	0	0	2	1	1	1	0	41	28	34	43	30	1	1	0	0	0	0
8	1	0	76	19.22	0	117	1	0	1	68	106	66	7.56	161	12.828	6.25	11	1.87	64	1	1	1	0	1	1	0	1	0	0	0	0	0	0	0	0	0	0	1	61	25	24	40	24	0	1	0	0	0	0
5	0	1	74	24.61	0	121	1	0	1	83	162	90	1.04	265	2.5	7.16	40	3.35	98	0	1	1	1	0	1	0	1	0	0	0	0	0	0	1	0	0	0	0	54	33	30	49	29	0	1	0	0	0	0
9	1	1	61	22.58	1	146	1	0	1	66	125	83	10.43	202	16	14.64	52	2.87	62	1	1	1	1	0	1	0	0	0	0	0	0	0	0	1	1	0	0	0	63	33	33	50	32	0	0	1	0	0	0
4	0	1	49	25.78	1	143	1	0	1	70	120	75	5.11	277	0.001	5.5	45	2.52	80	0	1	1	1	0	1	1	0	0	0	0	0	0	0	0	0	1	0	1	61	31	28	44	30	0	1	0	0	0	0
6	1	0	55	23.33	0	144	1	1	1	92	152	76	11.37	191	7.906	6.7	42	4.2	53	0	1	1	0	1	1	1	1	0	0	0	0	0	0	1	0	0	0	0	54	33	30	49	29	0	1	0	0	0	0
6	1	0	59	22.89	0	119	1	0	1	72	100	58	11.66	177	0.098	8.86	114	0.91	52	0	1	1	0	1	1	1	1	0	0	0	0	0	0	0	0	0	0	0	40	22	25	42	20	0	1	0	0	0	0
3	1	1	79	20.02	1	129	1	0	1	69	136	70	6.34	128	1.347	4.46	12	2.52	149	0	1	1	1	0	2	0	0	0	0	0	0	0	0	1	0	0	0	0	54	33	30	49	29	0	1	1	1	0	0
7	0	1	57	25.26	1	152	1	0	1	92	150	90	6.09	139	0.03366	17.71	74	2.7	92	0	1	1	1	0	1	0	0	0	0	0	0	0	0	1	0	2	0	0	48	41	40	52	31	0	0	1	1	0	0
7	0	1	73	28.47	1	127	1	0	1	54	130	68	7.57	229	3.87	5.16	21	2.27	94	0	1	1	1	0	1	0	1	0	0	0	0	0	0	0	1	0	1	0	74	33	32	49	29	1	1	0	0	0	1
8	1	0	77	20.8209	0	119	1	0	1	60	100	60	9.56	197	0.751	5.35	38.5	1.64	69	0	1	1	1	0	2	0	0	1	1	0	0	0	0	1	0	1	0	1	51	35	35	49	19	0	0	0	0	1	0
10	1	0	82	19.7239	0	93	1	0	1	74	156	80	5.48	117	0.975	7.64	11.1	3.84	82	0	1	1	1	0	1	0	1	0	0	0	0	0	0	1	1	1	0	1	64	35	35	37	19	0	0	1	0	0	0
7	1	0	71	20.83	0	111	1	0	1	66	120	84	5.07	279	0.001	3.9	45	1.6	70	1	1	1	1	0	1	0	0	0	0	0	0	0	0	1	1	0	1	0	74	43	22	40	24	0	1	0	0	0	0
7	0	1	80	24.22	0	139	1	0	0	63	126	60	9.91	163	0.266	5.88	19	2	167	0	1	1	1	0	1	0	0	0	0	0	0	0	0	1	0	0	0	0	54	33	30	49	29	0	0	1	1	0	0
21	1	1	76	23.4236	1	119	0	1	1	84	140	85	10.16	80	0.14	8.74	92.6	0.51	100	1	1	1	1	0	4	0	1	0	0	0	0	0	0	1	1	2	0	1	30	45	39	70	20	0	1	1	0	0	0
10	0	0	61	20.43	0	130	1	0	1	69	140	90	9.48	212	0.53	6.7	45	3.31	88	1	1	1	1	0	1	0	1	0	0	0	0	0	0	0	0	0	0	0	58	28	28	45	27	0	1	0	0	0	0
3	1	0	53	19.03	0	116	1	0	1	72	120	70	15.91	252	16	9.66	98	2	60	1	1	1	0	1	1	0	0	0	1	0	0	0	0	0	1	0	0	0	40	24	22	45	25	0	1	0	0	0	0
8	1	1	74	30.1162	0	104	0	0	1	78	120	80	3.76	163	0.891	5.37	6.6	1.71	109	1	1	1	1	0	2	0	1	0	0	0	0	0	0	2	1	1	0	1	40	38	35	55	18	0	1	0	0	0	0
14	1	1	76	27.08	0	103	1	1	1	80	148	82	8.54	240	16	8.94	57	1.7	91	0	1	1	1	0	2	1	1	1	0	0	0	0	0	2	0	1	0	1	61	38	36	44	28	0	0	1	1	0	0
21	1	1	57	23.7387	1	155	1	0	1	106	135	90	8.2	225	0.799	4.67	23.5	2.25	89.3	1	1	1	1	0	2	0	0	0	0	0	0	1	0	0	1	1	0	1	35	35	35	49	19	0	1	0	1	0	0
4	1	0	67	23.4236	1	128	1	0	0	98	134	90	6.98	166	0.444	6.86	48.1	2.3	55.8	0	1	1	1	0	1	0	0	0	0	0	0	0	0	1	1	1	0	1	61	35	35	49	19	0	1	0	0	1	0
10	0	0	75	24.5578	0	125	1	1	0	60	150	70	8.4	206	0.022	3.89	21.5	1.62	96.1	1	1	1	1	0	1	0	1	0	0	0	0	0	0	0	1	0	0	1	73	35	39	26	20	0	1	0	0	0	0
13	1	1	71	25.23	0	124	1	0	1	90	97	56	13.51	135	10.058	10.03	37	2.75	91	0	1	1	0	1	3	1	1	0	0	0	0	0	0	1	1	1	2	0	35	38	34	66	32	0	1	0	0	0	0
19	0	1	51	24.2215	1	136	1	1	1	100	120	90	7.34	168	1.18	5.27	11.2	1.93	64.9	0	1	1	1	0	2	0	1	0	0	0	0	0	0	0	1	0	0	1	51	35	35	49	19	0	0	1	0	0	0
20	1	0	66	24.2382	1	133	0	0	0	76	88	65	9.11	159	0.302	5.86	118.2	4.32	62.3	1	1	1	1	0	2	1	1	0	0	0	0	0	0	2	1	1	0	1	31	38	33	59	18	0	1	0	0	0	0
8	0	1	68	29.76	1	122	0	0	1	70	125	78	10.19	222	6.9	4.8	91	2.53	85	1	1	1	0	1	2	0	0	0	0	0	0	0	0	1	0	1	0	0	42	33	28	46	29	0	1	0	0	0	0
24	1	1	74	23.3217	0	122	0	0	1	128	140	90	10.74	150	1.223	8.42	29	1.89	104.4	1	1	1	1	0	1	0	0	0	0	0	0	0	0	1	0	1	0	0	45	34	32	57	29	1	0	1	1	0	0
12	1	1	81	24.91	0	82	1	0	1	90	112	77	6.1	142	2.443	5.36	45	1.34	232	0	1	1	1	1	2	1	1	0	0	0	1	0	0	1	0	0	0	0	54	33	30	49	29	0	1	1	0	0	0
5	1	1	62	28.34	0	144	1	1	1	98	158	69	10.73	278	3.953	6.86	26	2.59	79	1	1	1	0	1	1	0	1	0	0	0	0	0	0	0	0	0	0	1	77	31	29	50	28	0	1	0	0	0	0
7	1	0	63	23.4236	0	121	1	0	1	90	100	70	9.11	154	1.13	6.04	64.5	1.97	53	1	1	1	1	0	4	0	0	0	0	0	0	0	1	1	0	1	0	1	51	35	35	49	19	1	1	0	0	0	0
7	1	1	50	23.51	0	117	1	0	1	84	97	63	11.09	238	3.5	5.21	41	1.88	109	1	1	1	1	1	1	0	1	1	0	0	0	0	0	0	0	0	0	1	59	32	30	48	27	0	1	0	0	0	0
4	1	1	85	19.0311	1	124	1	0	1	99	120	85	7.04	312	4.9	7.65	5.8	3.06	72	1	1	1	1	0	1	1	0	0	0	0	0	0	0	1	1	0	0	1	58	35	35	48	19	1	0	1	0	0	0
9	1	1	51	28.49	0	139	1	0	1	69	165	98	11.39	255	8.356	6.34	35	2.82	74	1	1	1	0	1	1	0	1	0	0	0	0	0	0	0	0	0	0	1	72	32	30	44	28	1	1	0	0	0	0
8	1	1	61	23.4236	1	152	0	1	1	87	165	111	10.7	224	0.634	5.14	108.1	3.48	76.7	1	1	1	1	0	3	0	1	0	0	0	0	0	0	1	0	1	0	1	39	45	38	55	18	0	0	1	0	0	0
5	0	0	69	23.94	1	71	0	0	1	77	120	81	9.48	308	0.744	16.02	45	3.25	88	0	1	0	1	0	1	0	0	1	0	0	0	0	0	1	0	0	0	0	54	33	30	49	29	0	0	0	0	0	0
11	1	1	47	23.5567	0	134	0	0	1	98	140	90	12.09	235	0.05898	7.06	22	3.19	60.3	1	1	1	1	0	1	0	0	0	0	0	0	0	0	1	0	1	0	0	62	30	24	48	25	0	1	1	0	0	0
10	0	1	63	23.12	1	133	1	1	1	75	139	75	8.84	178	3.153	5.65	45	1.7	162	0	1	1	1	0	2	0	1	0	0	0	0	0	0	0	0	0	0	0	71	35	33	47	30	0	1	0	0	0	0
6	1	1	71	25.47	1	146	0	0	0	84	130	82	10.23	113	16	9.35	62	1.46	106	1	1	1	1	0	1	0	0	0	0	0	0	0	0	0	0	0	0	1	65	34	30	51	32	0	1	0	0	0	0
11	1	1	39	24.7355	0	149	1	0	1	80	130	90	19.67	266	2.292	6.02	67	3.04	63.2	1	1	1	1	0	1	0	0	0	0	0	0	0	0	0	0	1	0	0	55	30	33	47	29	0	1	0	0	0	0
11	0	1	75	18.03	1	125	1	0	1	70	130	60	12.59	260	7.3	5.94	32	2.23	86	1	1	1	0	1	2	0	1	0	0	0	0	0	0	1	1	0	1	0	59	32	29	48	29	0	1	0	0	0	0
8	0	0	66	23.83	0	117	1	0	1	65	125	70	9.41	165	0.25	5.34	18	2.29	72	0	1	1	1	0	2	0	1	0	0	0	0	0	0	1	0	0	0	1	73	28	31	43	30	1	1	0	0	0	0
7	0	1	71	20.2	1	130	1	0	1	58	130	70	9.48	212	0.142	4.08	45	2.57	75	0	1	1	1	0	1	0	0	0	0	1	1	1	0	1	0	0	0	1	62	35	33	48	27	0	1	0	0	0	1
10	1	1	72	23.67	0	130	1	0	1	103	141	88	7.6	255	0.049	4.86	26	2.21	98	0	1	0	0	0	1	0	1	1	0	0	1	0	0	1	0	0	0	0	54	33	30	49	29	0	1	0	0	0	0
7	0	1	83	22.7204	0	110	1	0	1	66	146	67	7.96	105	1.04	6	15	1.51	115	1	1	1	1	0	2	1	1	1	0	0	0	0	0	1	0	1	0	0	67	38	36	48	17	0	1	1	1	0	0
4	1	1	67	23.4236	1	102	0	0	0	50	82	42	8	189	0.018	5.78	45.4	2.48	73.8	1	1	1	1	0	4	0	0	0	1	0	0	0	0	1	1	1	0	0	55	36	47	49	19	0	1	0	0	0	1
9	0	1	68	33.06	1	147	1	1	1	74	130	83	13.23	191	0.27	5.59	45	3.28	139	1	1	1	1	0	1	0	1	0	0	0	0	0	0	0	0	1	0	0	45	37	33	50	32	0	1	0	0	0	0
5	1	1	62	26.08	0	151	1	1	1	55	136	69	7.34	133	10.385	8.38	35	1.73	74	1	1	1	1	0	1	1	1	0	0	0	0	0	0	0	1	0	1	1	77	31	32	44	31	0	1	0	0	0	1
9	0	1	83	24.0711	1	88	1	0	0	94	190	80	14.8	238	0.6105	7	186	2.34	241.5	0	1	1	1	0	2	0	0	0	0	0	0	0	0	1	1	1	0	0	54	34	35	50	33	0	0	0	0	1	0
7	0	1	79	23.6526	1	122	1	0	1	60	150	90	8.95	185	0.1058	6.21	16	3.82	195	0	1	1	1	0	1	0	1	0	0	0	0	1	0	1	0	0	0	0	50	35	32	45	27	0	1	1	0	0	0
17	1	1	63	24.6094	1	136	1	0	1	83	150	100	10.33	175	0.729	5.6	28.4	4.36	81	0	1	1	1	0	1	0	0	0	0	0	0	0	0	1	0	1	0	1	69	25	31	39	16	0	0	1	0	0	0
10	1	1	42	27.54	1	144	1	0	1	77	124	79	8.68	190	0.004	5.39	68	1.81	149	1	1	1	1	0	1	1	1	0	0	0	0	0	0	0	0	0	0	1	70	34	26	48	26	0	1	0	0	0	0
7	0	1	53	24.22	1	143	1	0	1	76	168	105	9.78	250	16	9.99	26	4.14	70	1	1	1	0	1	1	0	1	0	0	0	0	0	0	0	0	0	0	1	56	27	25	51	23	0	1	0	0	0	0
2	1	1	58	25.6055	1	151	0	1	0	60	145	81	13.08	235	0.131	5.68	13.1	1.82	72.9	0	1	1	1	0	1	0	0	0	0	1	0	0	0	1	0	1	0	1	64	35	35	45	19	0	1	0	0	0	0
6	1	1	79	23.4236	0	125	1	0	1	82	120	80	7.23	163	0.576	9.72	22.8	1.91	85	0	1	1	1	0	4	1	1	0	0	0	0	0	1	2	1	1	0	1	37	38	26	59	17	0	1	0	0	0	0
17	1	1	67	22.9334	1	125	0	0	0	50	130	90	12.6	219	0.032	6.72	79.2	2.29	169	1	1	1	1	0	2	0	1	0	0	0	0	0	0	1	1	1	0	1	48	35	35	35	19	0	1	0	0	0	1
13	1	1	71	23.4236	1	129	1	0	1	130	100	70	7.68	207	2.31	13.62	13.4	2.28	119	1	1	1	1	0	4	1	0	0	0	0	0	0	0	1	1	1	0	1	34	38	33	57	16	0	0	1	1	0	0
9	1	1	60	24.8088	0	138	1	0	1	76	150	100	10.49	170	0.03783	6.52	15	3.3	88.2	1	1	1	1	0	1	0	0	0	0	0	0	0	0	1	0	0	0	0	56	35	37	49	32	0	1	1	0	0	0
20	1	1	57	19.8413	1	116	1	0	1	89	120	70	9.16	216	0.076	9.54	18.6	3.38	69.9	1	1	1	1	0	1	0	1	0	0	0	0	0	0	0	0	0	0	1	40	35	35	49	19	0	1	1	0	0	0
8	1	1	48	24.554	0	154	0	0	1	79	120	80	12.72	161	0.3848	6.58	46	3.16	71.6	1	1	1	1	0	1	0	0	0	0	0	0	0	0	0	0	0	0	0	52	29	28	46	25	0	1	0	0	0	0
15	0	1	83	18.75	1	163	1	1	0	90	137	70	13.95	236	0.043	4.55	11.8	2.87	126	0	1	0	1	0	1	0	1	0	0	1	1	0	0	1	1	1	0	1	65	28	24	44	16	0	0	1	1	0	0
12	1	1	59	24.6177	0	137	1	1	1	82	160	120	8.32	194	0.5946	7.6	29	3.67	82.9	1	1	1	1	0	1	0	1	0	0	0	0	0	0	1	1	1	1	1	65	30	31	39	30	0	1	1	0	0	0
10	1	1	69	23.4236	1	139	1	0	0	119	101	69	9.64	133	6.02	6.52	84.3	1.88	78.6	0	1	1	1	0	3	0	0	0	0	0	0	0	0	1	0	1	0	1	51	35	35	49	19	0	1	0	0	0	0
11	0	1	74	20.52	0	131	1	0	0	58	148	62	11.97	227	16	7.93	48	3.35	113	1	1	1	0	1	2	0	1	0	0	0	0	0	0	1	1	0	0	0	57	43	37	59	33	0	1	0	0	0	1
8	0	1	65	25.1664	1	150	1	1	1	95	140	90	8.1	182	0.05008	6.76	26	3.36	90	1	1	1	1	0	1	0	1	0	0	0	0	1	0	1	0	0	1	0	54	36	33	50	31	0	1	0	0	0	0
8	1	0	75	25.39	1	100	1	0	1	99	129	66	7.37	287	0.079	5.32	11	2.22	73	1	1	1	1	0	1	0	1	1	0	0	0	0	0	1	0	0	0	0	54	33	30	49	29	0	1	0	0	0	0
8	1	1	71	24.5089	0	139	0	0	0	120	90	60	8.56	191	4.9	17	23.8	2.4	185	1	1	1	1	0	4	1	1	0	1	0	0	0	1	1	0	1	0	1	51	35	35	49	19	0	1	0	1	0	0
19	1	1	80	23.1162	1	100	1	0	1	84	146	90	5.52	237	0.6522	6.63	25	3.01	109	1	1	1	1	0	2	0	0	0	0	0	0	0	0	1	0	1	1	0	48	29	30	46	27	0	1	0	0	0	0
6	0	1	61	23.4236	0	122	1	0	0	89	130	90	7.07	184	0.089	5	41.6	2.48	99	0	1	1	1	0	1	0	1	0	0	0	0	0	0	1	0	1	0	1	40	43	40	65	19	0	1	0	0	0	0
15	1	1	63	21.77	1	125	1	0	1	83	127	81	13.08	283	16	7.18	136	2.4	58	1	1	1	0	1	2	0	0	0	0	0	0	0	0	1	0	0	0	0	47	26	32	50	24	0	1	0	0	0	0
7	1	1	72	24.6498	0	163	1	1	1	88	160	120	17.72	186	1.113	9.55	33	3.76	137.5	0	1	1	1	0	3	0	0	0	0	0	0	0	0	1	1	1	1	1	57	49	38	53	36	0	1	1	0	0	0
7	1	1	58	25.71	1	148	0	0	1	70	83	60	13.57	190	4.2	5.83	102	5.1	58	0	1	1	0	1	2	0	0	0	0	0	0	0	0	0	1	0	0	0	33	36	32	58	28	0	1	0	0	0	0
16	1	1	70	23.94	0	103	0	0	1	87	109	65	11.11	234	2.3	7.21	39	2.64	156	0	1	1	0	1	3	0	1	1	0	0	0	0	0	1	0	0	0	0	54	33	30	49	29	0	0	1	1	0	0
7	0	1	38	26.07	1	169	1	0	1	68	140	92	7.33	237	0.009	4.44	35	2.85	60	1	1	1	1	0	1	0	0	0	0	0	0	0	0	1	0	0	0	0	54	33	30	49	29	0	1	1	0	0	0
9	0	0	77	24.84	0	108	0	0	1	92	109	72	11.77	188	7.743	7.17	43	2.14	67	0	1	1	1	0	2	0	0	0	0	0	0	0	0	1	0	0	0	0	54	33	30	49	29	0	0	1	0	0	0
6	1	0	35	22.31	0	122	0	0	1	70	100	76	6.1	204	11.076	6.7	27	2.06	53	0	1	1	0	1	1	0	0	0	0	0	0	0	0	0	0	0	0	0	69	24	28	45	27	0	1	0	0	0	0
3	1	1	66	26.3	0	163	0	0	1	80	120	80	11.24	194	16	8.2	102	2.96	81	1	1	1	1	0	1	0	0	0	0	0	0	0	1	1	0	0	0	0	54	33	30	49	29	0	1	0	0	0	0
15	0	0	76	22.48	0	105	1	0	1	72	131	76	9.92	166	1.75	12.77	15	5.17	164	0	1	1	1	0	3	1	1	0	0	0	0	0	0	2	0	1	1	0	73	33	31	42	29	0	0	0	0	0	0
4	1	1	61	23.7812	1	123	1	0	1	75	130	70	5.77	210	0.577	8.22	23.1	3.38	82	0	1	1	1	0	1	1	0	0	0	0	0	0	0	1	1	1	0	1	37	36	35	56	19	0	1	0	0	0	0
11	0	1	62	23.4236	0	147	1	0	1	92	98	76	15.14	151	3.87	7.08	26.6	2.77	132	1	1	1	1	0	2	0	1	0	0	0	0	0	0	1	1	0	0	1	60	32	38	47	20	0	1	0	0	0	0
7	1	1	66	21.2585	1	128	1	0	1	76	117	78	10.03	202	10	5.55	102.4	2.66	71.8	1	1	1	1	0	1	0	1	0	0	0	0	0	0	1	1	2	0	1	63	32	38	43	16	0	0	1	0	0	0
20	1	1	43	23.4124	1	147	0	0	0	67	115	86	10.32	176	0.01949	4.63	18	3.98	66.7	1	1	1	1	0	1	0	0	0	0	0	0	0	0	1	0	0	1	0	55	30	33	49	29	0	1	1	0	0	0
15	0	1	74	26.1286	0	153	0	1	1	70	140	80	11.38	198	0.172	5.45	35.9	1.85	90.5	1	1	1	1	0	1	0	1	0	0	1	0	0	0	1	1	0	0	1	51	35	35	49	19	0	1	1	0	0	0
6	1	1	52	27.04	1	148	1	0	1	72	107	66	12.75	194	16	10.41	75	2.27	67	1	1	1	0	1	1	1	1	0	0	0	0	0	0	1	0	0	1	1	58	35	30	45	29	0	0	0	0	0	0
20	0	1	81	26.53	1	103	1	1	0	80	192	82	9.14	184	0.024	5.37	16	2.15	126	0	1	1	1	0	3	0	1	1	1	0	0	0	0	2	1	0	0	0	58	34	25	37	28	0	0	0	0	0	0
9	0	0	66	24.03	0	134	0	0	1	90	115	66	8.45	246	3.13	4.59	25	4.53	63	1	1	1	0	1	1	0	0	0	0	0	0	0	0	1	0	0	0	0	54	33	30	49	29	0	1	0	0	0	0
8	1	0	68	22.52	0	129	1	0	1	73	160	90	4.42	208	0.001	4.57	58	2.94	62	1	1	1	1	0	1	0	0	0	0	0	0	0	0	1	0	0	0	0	54	33	30	49	29	1	1	1	0	0	0
6	1	1	64	25.0562	0	149	1	0	1	84	110	80	11.71	238	1.896	9.39	25	2.5	109	1	1	1	1	0	1	0	0	0	0	0	0	0	0	1	1	0	0	1	60	32	30	43	30	1	1	1	0	0	0
13	1	1	56	16.9	1	107	0	0	0	74	109	48	7.58	241	9.787	5.64	45	1.52	56	1	1	1	0	1	1	0	0	0	0	0	0	0	0	0	0	0	0	1	66	36	31	48	28	0	1	0	0	0	0
12	1	1	56	24.2336	1	144	1	0	1	78	110	80	16.39	156	2.635	10.32	56	2.94	122.4	1	1	1	0	0	4	0	1	1	1	0	0	0	0	1	0	1	0	0	57	29	32	48	27	1	1	1	1	0	0
10	1	1	64	19.83	1	129	1	0	0	59	97	61	11.02	226	16	5.96	36	2.4	76	1	1	1	1	0	2	0	0	0	0	0	0	0	0	0	0	0	0	0	54	33	30	49	29	0	0	1	1	0	1
6	1	0	63	22.6964	0	125	0	0	1	69	100	70	11.67	242	1.525	8.4	38	4.21	63.1	1	1	1	1	0	2	0	0	0	0	0	0	0	0	1	0	0	0	0	45	23	23	50	20	0	0	1	0	0	0
6	0	0	72	25.78	0	104	1	0	1	66	114	65	6.9	234	4.058	5.51	30	2.74	77	0	1	1	1	0	1	0	0	1	0	0	0	0	0	0	1	0	0	0	65	31	31	45	28	0	0	1	0	0	0
48	1	1	52	25.5342	1	162	0	0	0	92	120	90	18.37	150	0.1743	23.68	44	4.44	102.9	1	1	1	1	0	1	0	1	0	0	0	0	0	0	1	0	0	0	0	55	33	32	45	28	1	1	0	0	0	0
11	0	0	56	21.6	0	106	1	1	1	114	156	88	10.15	226	4.933	16.64	22	2.52	72	0	1	1	1	0	2	1	1	1	0	0	0	0	0	1	1	1	0	0	45	38	29	46	26	0	0	1	1	0	0
19	1	1	69	24.2134	0	116	1	0	1	88	130	70	4.94	134	0.1432	9.79	10	1.83	113.3	1	1	1	1	0	1	1	1	0	0	0	0	0	0	2	1	3	1	0	46	46	50	55	37	1	1	1	1	0	0
5	1	1	62	23.4236	0	158	1	0	1	72	135	86	8.55	141	9.57	7.19	81.8	2.01	76	0	1	1	1	0	3	0	0	0	0	0	0	0	0	1	1	1	0	1	61	35	35	49	19	0	1	0	0	0	0
13	1	1	70	23.6249	1	154	0	0	1	76	124	65	13.38	130	2.034	9.31	32	2.84	147.9	1	1	1	1	0	1	0	0	0	0	0	0	0	0	0	0	0	0	0	54	26	29	37	26	0	1	0	0	0	0
7	0	0	78	18.7305	0	86	0	1	1	90	176	87	6.16	187	0.115	5.11	10.7	4.09	225	0	1	1	1	0	2	0	1	0	0	0	0	0	0	1	1	1	0	1	70	34	35	41	19	0	1	0	0	0	0
13	1	1	80	22.0932	0	146	1	1	1	98	168	96	11.81	257	0.035	6.07	16.4	2.77	97	0	1	1	1	0	1	1	1	0	0	0	0	0	0	1	1	1	0	1	51	35	35	51	19	0	1	0	0	0	0
11	1	1	59	23.89	1	146	1	0	1	72	158	92	6.27	224	12.315	7.49	37	2.82	91	1	1	1	0	1	1	0	1	0	0	0	0	0	0	0	0	0	0	1	53	35	31	50	29	0	0	1	0	0	0
5	0	1	51	25.39	1	138	0	0	1	76	120	72	8.63	284	14.144	6.76	66	3.01	90	0	1	1	0	1	1	1	0	0	0	0	0	0	0	1	0	0	0	0	54	33	30	49	29	0	1	0	0	0	0
9	1	1	67	22.0386	1	136	1	0	0	86	138	86	7.37	199	0.111	5.89	51.3	2.7	86	1	1	1	1	0	1	0	1	0	0	0	0	0	0	0	1	1	0	1	58	34	36	50	19	0	1	0	0	0	0
8	1	1	45	27.04	1	165	1	0	1	78	147	87	14.2	222	8.957	5.93	63	3.35	58	0	1	1	1	0	1	1	0	0	0	0	0	0	0	1	0	1	0	1	71	32	33	50	29	0	1	0	0	0	0
10	1	0	66	20.31	0	97	1	0	1	78	110	75	13.35	323	2.323	12.8	70	3.1	100	1	1	1	1	0	2	1	0	0	0	0	0	0	0	0	0	0	0	0	60	31	25	41	26	0	1	0	0	0	0
5	1	1	51	25.95	0	146	1	1	1	86	138	96	7.93	356	1.149	4.91	116	2.85	86	0	1	1	1	0	1	0	1	0	0	0	0	0	0	0	0	0	0	1	67	33	30	47	28	0	1	0	0	0	0
13	1	1	62	22.37	1	123	1	0	1	90	121	71	6.49	315	0.11	5.51	23	1.62	62	1	1	1	1	0	1	1	1	1	0	0	0	0	0	0	0	0	0	1	57	32	31	44	27	1	1	0	0	0	0
12	1	1	60	29.03	0	155	1	1	1	66	153	102	14.39	189	16	16.08	103	5.62	63	0	1	1	0	1	1	1	1	0	0	0	0	0	0	0	0	0	0	0	48	31	26	40	27	0	1	0	0	0	0
11	0	1	69	23.1473	0	147	0	0	1	87	150	96	5.3	106	0.101	5.58	37	0.79	77	1	1	1	1	0	1	0	0	0	0	0	0	0	0	1	1	0	0	0	66	31	29	43	16	0	0	1	0	0	0
9	1	1	84	21.9671	1	142	1	0	0	48	130	76	16.59	183	0.013	5.21	39.4	2.48	74	1	1	1	1	0	1	0	0	0	0	0	0	0	0	1	0	1	0	1	51	35	35	49	19	0	1	0	0	0	1
7	1	1	52	20.2	0	138	1	0	1	77	102	72	6.66	190	14.744	6.7	45	2.52	71	0	1	1	1	0	1	1	0	0	0	0	0	0	0	1	1	0	0	0	57	30	27	47	28	0	1	0	0	0	0
3	1	0	57	22.66	0	156	0	0	0	82	110	70	17.61	308	11.47	9.29	144	4.14	60	0	1	1	1	0	4	0	1	0	1	0	0	0	0	1	1	1	0	0	41	36	26	52	27	0	1	0	0	0	0
7	1	1	47	25.7	1	146	1	0	1	86	140	90	9.99	250	3.726	5.21	50	2.38	59	0	1	1	0	1	1	0	1	0	0	0	0	0	0	0	0	0	0	1	68	30	28	46	27	0	1	0	0	0	0
10	0	1	53	26.1966	1	127	1	1	1	72	126	76	11.89	211	2.03	5.39	46.2	2.48	91	1	1	1	1	0	1	0	1	0	0	0	0	0	0	1	0	1	0	1	44	36	35	52	18	0	1	0	0	0	0
8	1	0	48	23.62	1	138	1	1	0	88	158	78	8.22	212	7.06	4.97	30	2.69	41	0	1	1	0	1	1	0	1	0	0	0	0	0	0	1	0	1	0	1	66	30	29	44	27	0	1	0	0	0	0
9	0	1	53	26.2596	1	148	1	0	1	83	120	70	8.07	194	0.135	6.42	21.9	4.53	84	1	1	1	1	0	1	1	0	0	0	0	0	0	0	1	0	1	0	1	65	30	20	49	18	0	0	1	0	0	0
7	0	1	66	25.35	0	161	0	0	1	76	140	90	9.74	238	0.577	7.99	31	1.54	63	1	1	1	1	0	1	1	0	0	0	0	0	0	0	1	0	0	1	0	67	33	28	51	31	0	1	1	0	0	0
8	1	1	42	20.7	1	148	1	1	1	68	150	87	7.72	278	0.015	4.9	38	3.26	74	1	1	1	0	1	1	0	0	0	0	0	0	0	0	1	0	0	0	0	54	33	30	49	29	0	1	0	0	0	0
15	1	0	46	21.23	1	138	1	1	1	68	158	86	4.98	179	4.12	5.55	20	3.71	74	1	1	1	1	0	1	0	1	0	0	0	0	0	0	0	0	1	0	1	74	24	27	39	25	0	0	0	0	0	0
12	1	0	75	13.3849	0	86	1	0	0	78	135	78	6.86	321	1.31	4.86	11.3	3.23	76.8	0	1	1	1	0	2	0	1	0	0	0	0	0	0	2	1	1	0	1	31	35	35	56	19	0	0	0	1	0	0
7	1	1	58	23.3946	1	129	0	0	0	66	120	75	4.91	155	2.49	6.08	42	2.04	78	1	1	1	1	0	2	0	0	0	0	0	0	0	0	1	0	0	0	0	54	27	32	42	28	0	1	1	0	0	0
14	1	1	74	23.66	1	141	1	0	1	114	104	69	12.88	197	12.319	6.02	64	2.81	101	1	1	1	0	1	1	0	0	1	0	0	0	0	0	1	0	0	0	0	54	33	30	49	29	1	0	0	1	0	0
10	1	0	75	21.657	0	118	1	0	0	68	100	70	6.91	160	0.2228	11.85	13	4.41	52.5	1	1	1	1	0	1	0	1	1	0	0	0	1	0	2	1	2	0	0	42	42	22	54	23	0	1	1	0	0	0
8	1	1	63	25.9516	1	141	1	0	1	90	155	85	8.65	96	10	5.65	41.4	2.1	94	1	1	1	1	0	1	0	1	0	0	0	0	0	0	0	2	0	0	1	58	36	36	46	19	0	1	1	0	0	0
27	0	1	77	25.0657	1	123	1	0	0	108	198	112	9.86	181	0.206	6.01	16.1	3.96	172.4	0	1	1	1	0	3	0	0	0	0	0	0	0	0	1	1	0	0	1	44	35	35	57	19	0	1	1	1	0	0
21	0	1	59	23.7387	1	132	1	0	1	75	98	60	5.68	165	0.171	4.82	14.2	3.83	68.1	1	1	1	1	0	1	0	0	0	0	0	0	0	0	1	1	1	0	1	12	41	39	88	17	0	1	0	0	0	0
8	1	1	79	25.01	0	134	1	1	1	86	138	74	12.11	146	14.117	8.63	54	2.92	84	0	1	1	0	1	1	1	1	0	0	0	0	0	0	1	1	0	0	0	43	33	28	46	28	0	1	1	0	0	0
7	1	1	51	30.07	1	144	1	0	1	100	134	83	12.86	237	15.965	7.09	30	3.08	71	1	1	1	0	1	1	1	1	0	0	0	0	0	0	0	0	0	0	0	47	32	29	51	29	0	1	1	0	0	0
7	1	1	72	24.24	0	125	1	1	1	70	120	80	6.63	108	0.564	5.46	92	1.7	75	1	1	1	1	0	2	0	1	1	0	0	0	0	0	1	0	0	0	1	64	31	29	45	28	0	1	1	0	0	0
8	1	0	68	22.35	0	111	1	0	1	70	166	95	6.92	222	0.85	2.9	20	3.41	78	0	1	1	1	0	1	1	1	1	0	0	0	0	0	0	1	0	0	0	32	34	34	48	30	0	0	0	0	0	0
14	1	1	69	22.0456	1	113	1	0	1	111	131	79	13.7	137	2.532	8.4	139	3.19	90.2	1	1	1	1	0	1	0	0	0	0	0	0	0	0	1	0	1	0	0	47	25	26	44	25	0	1	0	0	0	0
5	1	1	66	24.86	1	135	1	0	1	79	161	94	7.36	224	3.382	5.5	39	2.77	115	0	1	1	1	0	2	0	1	0	0	0	0	0	0	1	1	0	1	0	55	32	31	52	25	1	1	0	1	0	0
9	0	0	75	26.4	0	145	1	1	1	76	186	80	7.44	223	8.503	10.83	32	2.73	65	1	1	1	0	1	1	1	1	0	0	0	0	0	0	0	1	0	0	1	63	27	26	41	26	1	1	0	0	0	0
8	0	1	65	23.4236	1	125	1	0	1	118	108	76	18.77	324	2.44	3.86	40.9	3.37	92.6	0	1	1	1	0	2	1	1	1	0	0	0	0	0	2	0	1	0	1	37	39	38	59	21	0	1	0	0	0	0
10	0	0	52	26.67	1	137	0	0	0	54	105	78	7.28	193	8.955	6.41	70	1.87	61	1	1	1	0	1	1	0	1	0	0	0	0	0	0	1	0	0	0	0	54	33	30	49	29	0	1	0	0	0	1
10	1	1	64	23.9101	1	143	1	0	1	70	140	80	8.31	179	1.029	8.4	22	1.8	91	1	1	1	1	0	1	0	0	0	0	0	0	0	0	1	1	1	0	0	56	32	32	47	28	0	1	1	1	0	0
15	1	1	44	22.4913	1	159	1	0	1	98	110	85	20.78	197	6.57	5.32	59.9	2.39	100	1	1	1	1	0	1	0	1	0	0	0	0	0	0	2	1	1	0	1	42	35	35	55	19	0	0	1	0	0	0
8	1	0	66	21.23	0	105	1	1	1	66	148	90	8.54	265	1.955	6.82	24	3.04	49	1	1	1	0	1	1	0	1	0	0	0	0	0	0	0	0	0	0	1	62	28	26	38	25	0	1	0	0	0	0
28	1	0	59	22.8928	0	123	1	0	1	83	140	80	7.9	956	0.258	3.55	59.8	2.37	55	0	1	1	1	0	1	0	1	0	0	0	0	0	1	1	1	1	0	1	51	35	35	49	19	0	1	0	0	0	0
20	1	0	56	22.0317	0	132	1	0	1	78	130	85	7.86	166	0.158	4.97	17.1	2.54	55	0	1	1	1	0	1	0	1	0	0	0	0	0	0	1	0	0	0	1	55	28	33	42	17	0	0	1	0	0	0
6	1	1	32	26.81	0	164	0	0	1	112	130	90	12.47	286	9.223	6.95	49	4.43	90	1	1	1	1	0	1	0	0	0	0	0	0	0	0	1	0	0	0	0	44	28	26	46	29	0	1	0	0	0	0
9	0	1	53	24.9135	1	156	1	0	1	76	120	80	9	224	0.42	5.32	47.8	3.14	53	1	1	1	1	0	1	0	0	0	0	0	0	0	0	1	0	0	0	1	55	30	33	46	16	0	1	0	0	0	0
14	1	1	66	18.424	1	123	1	0	1	67	170	120	10.92	304	0.262	3.88	15.9	3.07	80	1	1	1	1	0	2	0	1	0	0	0	0	0	0	1	1	1	0	0	51	30	35	46	20	0	0	1	1	0	0
5	1	0	54	26.3	0	96	1	1	1	87	173	82	7.42	284	1.451	5.55	19	2.05	51	1	1	1	1	0	1	0	1	0	0	0	0	0	0	1	0	0	0	0	54	33	30	49	29	1	0	0	0	0	0
1	1	1	64	25.95	1	138	0	0	1	88	113	63	13.9	210	16	6.65	73	2.6	92	0	1	1	0	1	1	0	0	0	0	0	0	0	1	0	1	0	0	0	46	34	28	46	28	0	1	0	0	0	0
12	1	1	61	18.424	0	106	0	0	0	120	120	80	8.87	144	1.69	6.72	18.7	1.48	93.6	0	1	1	1	0	2	1	0	1	0	0	0	0	0	1	1	1	0	1	48	36	36	54	18	1	0	1	1	0	0
7	1	1	71	23.09	1	95	1	0	1	64	131	62	6.48	463	0.51	5.44	18	1.68	104	1	1	1	1	0	1	0	0	0	0	0	0	0	0	0	1	0	1	0	50	30	29	50	26	0	1	1	0	0	0
15	1	1	64	24.8016	0	135	1	0	1	80	135	80	11.82	181	2.83	6.08	90.7	3.23	71.7	1	1	1	1	0	2	0	0	0	0	0	0	0	0	0	0	1	0	1	51	35	35	49	19	0	1	0	0	0	0
21	1	1	79	19.7232	0	141	1	0	0	83	140	90	3.03	87	1.31	5.27	19.5	2.65	116	1	1	1	1	0	1	0	0	0	0	0	0	0	0	1	1	1	0	1	39	37	35	55	19	0	0	1	0	0	0
10	1	0	53	21.7784	0	133	1	1	0	78	150	90	8.46	207	0.518	4.54	22.4	2.27	56	0	1	1	1	0	1	0	1	0	0	0	0	0	0	1	0	1	0	1	63	32	32	41	19	0	0	1	0	0	0
14	1	1	72	24.68	1	150	0	0	0	61	100	80	11.39	179	12.653	7.98	44	3.11	117	1	1	1	1	0	2	1	0	0	0	0	0	0	0	2	1	1	0	0	34	36	26	53	23	0	1	0	0	0	0
6	0	0	47	25.0918	0	128	1	0	1	106	130	90	12.88	184	1.046	7.03	23	3.24	92	1	1	1	1	0	2	0	1	0	0	0	0	0	0	0	0	0	1	1	60	33	30	46	30	0	1	0	0	0	0
13	1	0	79	21.09	1	107	1	0	1	100	127	78	11.08	222	13.173	10.34	85	2.82	66	1	1	1	1	0	3	0	1	0	0	0	0	0	0	0	1	0	0	0	53	24	29	42	23	0	1	0	0	0	0
8	0	0	55	24.12	1	125	1	0	1	95	198	113	12.54	231	0.245	4.9	41	4.32	43	1	1	1	1	0	1	0	1	0	0	0	0	0	0	1	0	1	1	1	72	30	33	47	32	0	1	0	0	0	0
9	0	1	57	29.75	0	145	1	1	1	85	140	90	10.11	357	1.713	6.97	30	3.55	85	1	1	1	1	0	1	1	1	0	0	0	0	0	0	0	0	0	0	0	60	32	27	41	30	0	0	1	1	0	0
13	1	1	52	23.8586	0	140	1	0	1	84	140	90	11.99	266	1.433	5.2	29	2.33	72.3	1	1	1	1	0	1	0	0	0	0	0	0	0	0	1	0	1	0	0	66	29	31	39	30	1	1	0	0	0	0
13	1	1	79	24.7721	0	133	1	1	0	88	150	90	5.72	186	1.56	6.57	15.2	1.96	74	1	1	1	1	0	1	1	1	0	0	0	0	0	0	1	1	1	0	1	69	38	38	41	21	0	1	0	0	0	0
11	0	1	76	23.5294	1	137	1	1	0	55	190	92	9.7	146	0.051	5.92	16.4	3.45	110	1	1	1	1	0	2	0	1	0	0	0	0	0	0	1	1	1	0	1	58	37	33	50	19	0	1	0	0	0	1
8	1	1	77	22.8012	1	132	1	0	1	91	155	101	17.08	138	2.49	8.4	10	3.94	87.8	1	1	1	1	0	1	0	0	0	0	0	0	0	0	1	1	0	0	0	40	27	32	35	31	0	1	1	1	0	0
17	1	1	64	23.5088	1	123	0	0	1	76	135	84	11.58	199	5.148	9.02	93	2.01	101	1	1	1	1	0	1	0	1	0	0	0	0	0	0	1	1	1	0	1	52	35	31	47	28	0	0	0	0	0	0
9	1	1	80	24.22	1	141	1	0	1	104	140	80	9.34	208	3.247	6.38	23	3.64	98	0	1	1	0	1	1	0	1	1	0	0	0	0	0	1	0	0	0	0	54	33	30	49	29	0	1	0	0	0	0
9	1	1	60	23.3067	1	134	1	0	1	70	125	85	10.8	153	0.199	10.03	48.2	2.7	70	1	1	1	1	0	2	0	1	0	0	0	0	0	0	1	1	1	0	1	65	40	33	41	21	0	1	0	0	0	0
8	1	1	79	25.0251	0	163	1	0	1	78	120	80	8.16	157	3.706	8.04	73	3.26	80	0	1	1	0	0	2	0	1	0	0	0	0	0	0	1	1	0	0	0	40	36	30	50	29	0	1	1	0	0	0
10	1	1	80	21.2306	1	140	1	0	1	60	150	90	6.06	123	0.071	8.98	19	2.87	101	1	1	1	1	0	1	0	0	1	0	0	0	0	0	1	0	2	0	1	42	35	35	46	19	0	1	0	0	0	0
12	0	0	71	26.6667	0	121	0	1	1	92	140	80	6.05	133	0.181	7.05	19.8	1.74	101	1	1	1	1	0	1	0	1	0	0	0	0	0	0	1	1	0	0	1	60	32	30	42	17	0	1	0	0	0	0
9	0	1	64	24.81	1	136	0	0	1	59	110	68	6.32	167	0.562	5.95	14	0.88	84	0	1	1	1	0	1	1	0	0	0	1	1	0	0	1	0	0	0	1	67	39	27	51	26	1	1	1	0	0	1
5	1	1	58	20.43	1	141	0	0	1	80	102	65	5.36	301	0.267	4.77	101	2.27	101	0	1	1	1	0	1	0	1	0	0	0	0	0	0	0	0	0	0	1	54	28	31	40	31	0	1	0	0	0	0
9	1	0	86	23.4236	0	113	0	0	0	99	167	110	18.08	162	0.911	9.49	24.1	2.09	86	0	1	1	1	0	4	0	1	1	0	0	0	0	0	1	0	1	0	1	51	35	35	49	19	0	0	1	1	0	0
9	1	1	66	28.03	0	114	1	1	1	93	182	96	8.93	174	5.257	6.7	37	2.29	77	0	1	1	1	0	2	1	1	0	0	0	0	0	0	2	0	1	0	0	42	37	32	55	33	0	1	0	0	0	0
8	1	0	64	23.8054	0	124	1	0	1	80	160	95	7.31	148	10	4.7	88.2	2.01	91.9	1	1	1	1	0	2	0	1	0	0	1	0	0	0	1	1	0	0	1	63	31	35	43	17	0	1	0	0	0	0
7	1	1	56	24.2137	0	131	1	0	1	78	160	120	7.11	225	0.9075	6.01	38	2.06	75.6	1	1	1	1	0	1	0	0	0	0	0	0	0	0	2	0	1	0	0	48	30	31	50	27	0	0	1	0	0	0
10	1	1	61	28.04	1	120	0	0	1	70	107	72	10.84	170	10.127	6.7	63	2.29	96	1	1	1	1	0	4	0	1	0	0	0	0	0	0	0	1	0	0	0	50	34	33	47	30	0	1	0	0	0	0
11	0	1	58	24.0189	0	109	1	0	1	84	120	80	17.36	182	2.868	6.96	40	2.53	78	1	1	1	1	0	2	0	0	0	0	0	0	0	0	1	0	1	1	0	49	42	30	55	30	1	1	0	0	0	0
11	1	1	73	25.53	1	140	1	1	1	102	164	74	8.54	169	0.239	12.27	25	3.29	99	1	1	1	1	0	2	1	1	0	0	0	0	0	0	1	1	1	1	1	59	29	34	52	28	0	1	0	0	0	0
9	1	1	80	23.94	0	101	0	0	1	152	128	76	13.56	112	24	6.7	97	1.11	120	0	1	1	0	1	4	0	0	0	1	0	0	1	0	1	0	0	0	0	54	33	30	49	29	0	1	0	1	1	0
17	0	0	73	24.97	0	112	1	1	1	98	166	78	7.79	197	8.327	9.68	33	3.22	97	1	1	1	1	1	3	1	1	0	0	0	0	0	0	0	2	0	0	1	64	31	27	48	21	1	0	1	1	0	0
6	0	1	63	23.94	1	104	0	0	0	90	83	54	9.54	191	8.395	7.24	45	3.27	130	0	1	1	0	1	4	0	0	0	1	0	0	0	0	1	0	0	0	0	54	33	30	49	29	0	1	0	1	0	0
9	1	1	53	25.95	0	148	1	0	1	65	119	62	9.9	225	16	6.01	46	3.66	64	1	1	1	1	0	1	0	0	0	0	0	0	0	0	1	1	0	1	0	46	30	28	48	28	1	1	0	0	0	0
7	0	1	57	25.81	0	127	1	0	1	94	123	68	13.17	206	3.116	4.7	45	2.52	77	1	1	1	1	0	1	0	0	0	0	0	0	0	0	1	0	0	0	1	57	39	29	54	29	0	1	1	0	0	0
7	0	0	61	21.21	0	121	1	0	1	74	145	95	11.01	289	2.08	5.25	45	3.47	49	1	1	1	0	1	2	0	0	0	0	1	1	0	0	0	0	0	0	1	66	29	30	41	28	0	1	0	0	0	0
46	0	0	81	25.71	0	125	1	1	0	82	144	87	7.8	309	13.363	5.44	12	2.67	54	0	1	1	1	0	3	0	1	0	0	0	0	0	0	2	0	0	0	1	43	37	25	46	27	0	0	0	0	0	0
11	1	1	46	22.9854	1	127	0	0	0	65	110	70	9.89	146	0.689	5.17	98.9	3.15	90	0	1	1	1	0	1	0	1	0	0	0	0	0	0	1	1	1	0	1	50	40	35	58	19	0	1	0	0	0	0
11	1	1	58	18.424	1	125	0	0	0	79	120	72	8.43	152	3.67	5.11	42.4	3.4	67	0	1	1	1	0	1	0	0	0	0	0	0	0	0	1	1	1	0	1	40	30	32	47	18	0	1	1	0	0	0
45	1	1	62	18.3391	0	173	1	0	1	110	120	90	9.19	207	0.019	6.37	99.2	2.9	56.7	1	1	1	1	0	3	0	1	0	0	0	0	0	0	2	0	1	0	0	45	35	33	52	17	0	0	1	0	0	0
11	0	0	72	24.974	1	129	1	1	1	88	140	90	9.28	250	0.468	8.24	13.1	2.77	130.1	0	1	1	1	0	2	0	1	0	0	0	0	0	0	1	0	1	0	1	45	39	30	51	20	0	1	1	0	0	0
8	1	1	51	23.6614	0	140	1	0	1	59	120	80	8.98	129	5.94	6.79	64.3	5.92	97	1	1	1	1	0	1	0	0	0	0	0	0	0	0	0	0	1	0	1	57	38	35	44	19	0	1	0	0	0	1
9	1	1	61	24.1514	0	161	1	0	1	84	160	90	11.55	217	0.05274	5.33	27	2.66	71	1	1	1	0	0	2	0	0	0	0	0	0	0	0	0	0	0	0	0	25	35	38	56	23	0	1	0	0	0	0
15	1	0	65	23.4471	1	89	1	0	1	56	117	66	13.33	237	0.4964	8.4	46	3.5	132	1	1	1	1	0	1	1	1	0	0	0	0	0	0	2	1	2	1	0	52	34	33	47	29	0	1	0	1	0	1
5	1	1	67	27.99	1	118	0	0	0	98	116	72	11.94	402	1.071	5.51	66	1.86	93	0	1	1	1	0	4	0	1	0	0	0	0	0	0	1	1	2	1	0	33	40	40	62	40	0	1	1	1	0	0
12	0	1	71	21.048	0	122	0	0	0	104	120	70	15.03	198	0.104	6.18	16.1	1.73	123.7	0	1	1	0	0	1	0	0	0	0	0	0	0	0	1	1	1	0	1	39	35	35	49	19	0	0	0	0	0	0
6	1	1	46	26.83	1	118	1	1	1	65	150	102	11.94	402	1.071	6.64	66	1.86	93	1	1	1	1	0	1	0	1	0	0	0	0	0	0	0	0	0	0	1	64	32	30	52	32	0	1	0	0	0	0
10	0	1	57	28.4	0	130	0	0	1	90	100	60	9.48	212	11.288	7.39	59	2.85	73	0	1	1	1	1	1	1	0	0	0	0	0	0	0	0	0	1	0	1	55	32	30	48	31	0	1	0	0	0	0
6	1	1	66	25.24	1	118	0	0	1	80	129	80	8.2	212	14.16	6.84	53	1.79	94	0	1	1	1	0	1	0	1	0	0	0	0	0	0	1	0	0	0	0	54	33	30	49	29	1	1	0	0	0	0
6	1	0	61	28.89	0	101	1	0	1	80	150	100	10.03	297	11.833	14.38	54	2.49	87	1	1	1	1	0	1	1	0	0	0	0	0	0	0	2	0	1	0	1	68	39	32	48	32	1	1	0	0	0	0
8	1	1	65	24.57	1	154	1	0	1	69	132	60	13.71	174	13.272	6.93	120	3.49	72	1	1	1	0	1	1	1	1	0	0	0	0	0	0	1	0	0	0	0	51	28	28	48	31	0	1	0	0	0	0
12	0	1	58	25.5102	1	137	1	0	1	76	135	80	6.02	268	0.029	6.99	15.9	0.81	131	1	1	1	1	0	2	1	1	0	0	0	0	0	0	1	1	1	0	1	66	35	35	49	19	0	1	0	0	0	0
8	1	1	48	24.5451	1	127	0	0	0	48	90	60	15.66	319	0.02114	12.31	23	3.25	71.7	1	1	1	1	0	1	0	1	0	0	0	0	0	0	1	0	0	0	1	60	40	37	48	37	0	1	1	1	0	1
15	0	1	64	24.858	1	142	1	1	1	88	142	88	7.8	226	0.164	4.75	30.9	1.96	80.3	1	1	1	1	0	1	0	1	0	0	0	0	0	0	0	0	0	0	1	68	29	32	45	15	0	1	0	0	0	0
13	1	1	52	21.4533	1	136	0	0	1	80	120	70	12.94	161	1.73	12.36	31.4	2.15	58.1	1	1	1	1	0	1	0	0	0	0	0	0	0	0	1	0	1	0	0	59	25	20	41	17	0	0	1	0	0	0
6	0	1	64	23.4586	1	136	1	1	1	65	145	85	7.42	188	0.613	4.81	15.5	2.24	74	0	1	1	1	0	1	0	0	0	0	0	0	0	0	0	0	0	0	1	56	28	28	45	27	0	1	0	0	0	0
14	0	0	82	31.7864	0	95	1	0	1	97	177	87	10.34	218	0.372	5.42	12.3	3.13	150	0	1	1	0	0	1	0	1	1	0	1	0	0	0	1	0	1	0	1	60	35	35	49	19	0	0	0	0	0	0
14	1	1	36	24.016	0	133	1	0	1	65	160	80	14.93	239	0.8248	8.99	61	2.7	76.9	1	1	1	0	0	1	0	0	0	0	1	0	0	0	1	1	1	1	0	48	32	32	54	30	0	0	0	0	0	0
7	1	1	51	25.6283	0	161	1	0	1	94	180	120	13.06	245	1.245	8.24	54	3.36	93.3	1	1	1	1	0	1	0	0	0	0	0	0	0	0	0	0	0	0	0	58	30	30	47	27	0	1	0	0	0	0
9	1	1	62	19.7239	1	119	1	0	0	78	160	80	9.7	195	7.51	4.81	39.6	2.63	70	1	1	1	1	0	1	0	1	0	0	0	0	0	0	1	1	1	0	1	58	30	32	46	19	0	1	0	0	0	0
17	1	1	76	22.863	0	133	1	0	1	96	100	65	11.58	127	0.0545	8.4	19	3.02	77	1	1	1	1	0	1	0	0	0	0	0	0	0	0	1	1	1	0	0	43	34	31	47	31	0	1	0	0	0	0
11	1	1	47	23.728	1	147	1	0	1	56	180	110	10.75	184	0.147	5.93	40.9	3.4	70	1	1	1	1	0	1	0	0	0	0	0	0	0	0	1	0	1	0	1	60	33	36	46	18	0	1	0	0	0	1
27	1	1	81	21.5645	0	131	0	0	0	93	120	75	3.88	130	0.693	5.28	8.7	2.63	86	1	1	0	0	0	2	0	0	1	0	0	0	0	0	2	0	1	0	0	50	29	31	48	17	0	0	1	0	0	0
6	1	1	78	23.5718	0	141	1	0	1	102	130	80	14.12	191	2.154	6.74	43	2.43	92	1	1	1	1	0	1	0	1	0	0	0	0	1	0	0	1	1	0	0	24	24	35	56	24	0	1	1	0	0	0
6	1	1	54	22.9123	1	137	0	0	0	56	130	70	5.94	127	0.02873	7.3	12	2.14	99.1	1	1	1	0	0	1	0	0	0	0	0	0	0	0	1	0	1	0	0	60	27	33	46	28	0	1	0	0	0	1
8	1	0	68	23.4236	0	109	0	0	0	90	135	80	13.97	195	4.23	6.53	67.5	2.99	69	0	1	1	1	0	2	0	0	0	0	0	0	0	0	1	0	1	0	1	55	32	30	49	18	0	1	0	0	0	0
14	1	1	71	21.7993	1	107	0	0	0	89	110	70	16.01	136	3.25	9.23	41.6	2.77	74.9	0	1	0	0	0	1	0	0	0	0	0	0	0	1	1	0	2	0	1	56	35	42	49	19	0	0	0	0	0	0
4	0	0	70	23.361	0	102	1	0	1	66	130	80	5.79	191	3.972	6.42	17	3.46	71.1	1	1	1	1	0	1	0	0	0	0	0	0	0	0	1	0	1	0	0	45	43	29	52	26	0	1	1	0	0	0
12	0	1	76	22.9262	0	110	0	0	0	78	140	90	9.75	202	0.8492	9.32	18	2.23	119.1	1	1	1	0	0	2	0	0	0	0	0	0	0	0	0	0	1	1	0	55	29	38	42	30	0	1	0	0	0	0
7	1	1	66	23.3342	1	104	1	0	0	53	140	80	7.09	212	0.03718	8.4	16	2.29	107.1	1	1	1	1	0	1	0	1	0	0	0	0	0	0	0	1	0	0	0	52	29	32	50	28	1	1	1	0	0	1
7	1	1	43	22.86	1	163	1	0	1	74	107	74	10.58	202	16	5.23	63	2.63	87	1	1	1	1	0	1	0	0	0	0	0	0	0	0	0	0	0	0	0	51	30	30	50	30	0	1	0	0	0	0
8	1	0	58	23.0673	0	119	0	0	0	45	80	50	14.16	238	0.02802	9.61	26	3.98	99	1	1	1	0	0	1	0	0	0	1	0	0	0	0	2	0	2	0	0	58	33	27	42	23	1	1	1	1	0	1
6	1	1	73	23.94	1	130	1	0	1	78	134	74	7.56	226	5.107	6.8	33	3.33	109	1	1	1	0	1	2	0	0	0	0	0	0	0	0	1	0	0	0	0	54	33	30	49	29	1	1	0	0	0	0
6	1	0	55	23.4236	0	97	1	0	1	65	120	75	5.63	135	1.09	9.51	82	5.25	56	1	1	1	1	0	2	1	0	0	0	0	0	0	0	1	0	1	0	1	47	29	33	44	15	0	1	0	0	0	0
8	1	1	36	24.03	0	152	0	0	1	104	130	74	12.12	256	12.513	6.2	52	5.62	61	1	1	1	0	1	1	0	0	0	0	0	0	0	0	1	0	0	0	0	46	29	28	51	28	0	1	0	0	0	0
8	1	1	74	23.4375	1	133	1	1	1	70	195	120	7.72	150	0.618	5.12	33.1	2.51	100	1	1	1	1	0	1	0	1	0	0	0	0	0	0	2	1	1	0	1	47	43	35	49	19	0	1	0	0	0	0
6	0	1	66	18.6709	0	120	1	1	0	83	240	140	5.72	185	0.251	4.55	16	3.55	130	0	1	1	1	0	1	0	1	0	0	0	0	1	0	1	1	1	0	1	41	32	35	56	19	0	1	0	0	0	1
6	0	1	66	18.6709	0	120	1	1	0	83	240	140	5.72	185	0.251	4.55	16	3.55	130	0	1	1	1	0	1	0	1	0	0	0	0	0	0	1	1	1	0	1	41	32	35	56	19	0	1	0	0	0	1
6	0	1	65	25.04	1	129	1	0	0	49	142	84	8.02	180	4.245	4.29	19	2.17	81	1	1	1	1	0	1	0	0	0	0	0	0	1	0	0	1	0	0	1	56	33	29	49	31	1	1	0	0	0	1
6	0	1	65	25.04	1	129	1	0	0	49	142	84	8.02	180	4.245	4.29	19	2.17	81	1	1	1	1	0	1	0	0	0	0	0	0	0	0	0	1	0	0	1	56	33	29	49	31	1	1	0	0	0	1
7	1	0	57	22.7225	0	114	0	0	1	79	130	70	6.65	201	0.1273	7.31	16	2.86	63.5	1	1	1	1	0	1	0	0	0	0	0	0	0	0	0	0	1	0	0	56	25	30	43	26	0	1	0	0	0	0
11	1	1	66	29.2969	1	144	1	0	1	90	95	62	17.59	241	0.023	5.03	26.5	3.82	96	1	1	1	1	0	2	0	1	0	1	0	0	0	0	1	0	0	0	1	60	38	35	44	17	0	1	0	0	0	0
12	1	0	70	23.4236	0	116	1	0	1	101	142	95	7.14	276	0.057	4.76	51.5	2.77	70.9	1	1	1	1	0	1	0	1	1	0	0	0	0	0	0	1	0	0	1	60	27	29	47	18	0	1	0	0	0	0
9	1	0	55	23.0337	0	105	1	0	0	70	120	80	8.19	201	3.119	6.88	17	2.11	88.7	1	0	1	0	0	1	0	1	0	0	0	0	1	0	0	1	1	1	1	58	24	28	30	26	1	1	0	0	0	0
3	0	0	71	22.07	0	126	1	0	1	75	124	56	4.51	142	1.03	4.25	26	2.53	75	0	1	1	1	0	3	0	1	0	0	0	0	0	0	1	2	0	0	0	30	40	24	46	22	0	0	0	1	0	0
10	1	0	68	23.3533	0	126	1	0	1	94	140	90	14.27	172	2.372	7.91	55	2.72	54.8	1	1	1	1	0	1	0	1	0	0	0	0	0	0	1	0	0	0	0	40	25	32	39	30	0	1	0	0	0	0
16	1	1	59	23.03	1	125	1	0	1	114	141	89	7.01	153	2	5.91	51	1.95	164	0	1	1	1	0	3	0	0	0	0	0	0	1	0	1	0	1	0	0	46	34	29	54	28	1	1	0	1	0	0
14	1	1	61	29.39	1	147	1	1	1	65	154	82	10.17	227	9.654	17.27	51	2.52	69	0	1	1	0	1	1	1	1	0	0	0	0	0	0	1	0	0	0	0	54	33	30	49	29	0	1	0	0	0	0
3	1	0	67	23.4236	0	120	1	1	1	75	180	80	8	226	10	4.69	64.2	2.55	74	0	1	1	1	0	2	0	0	0	0	0	0	0	0	1	1	1	0	1	40	25	27	50	16	0	0	1	0	0	0
11	1	1	49	21.7993	0	141	0	0	1	78	90	60	11.32	217	0.003	4.3	20.6	2.52	77	1	1	1	1	0	1	0	0	0	0	0	0	0	0	1	0	1	0	0	70	33	30	44	19	0	1	1	0	0	0
11	1	0	75	23.4236	0	110	1	0	0	58	140	86	9.59	147	0.095	5.85	25.6	2.05	55	1	1	0	0	0	2	0	1	0	0	0	0	0	0	0	0	1	0	1	45	36	32	43	16	0	0	0	0	0	1
11	0	1	66	23.4236	1	113	1	0	1	80	120	80	9.63	284	0.32	7.38	16.5	1.47	75.2	0	1	1	1	0	2	1	0	0	0	0	0	0	0	1	1	1	0	1	46	36	33	49	21	0	1	0	0	0	0
9	0	1	79	23.4236	0	125	1	1	1	90	130	70	8.76	122	0.139	9.97	16.4	2.14	106	0	1	1	1	0	2	1	1	0	0	0	0	0	0	1	0	1	0	1	42	46	37	55	18	0	0	1	1	0	0
6	0	1	47	25.61	1	149	1	0	1	63	110	70	10.11	213	15.363	5.98	55	3.26	90	1	1	1	1	0	1	0	0	0	0	0	0	0	0	0	0	1	0	1	62	35	32	50	31	0	1	0	0	0	0
12	0	1	49	30.8	0	153	1	1	1	92	174	108	7.89	267	0.044	4.15	84	2.75	77	1	1	1	1	0	1	0	1	0	0	0	1	0	0	0	0	0	0	1	56	35	31	50	31	1	0	0	0	0	0
11	1	1	55	27.1178	1	141	0	0	0	64	91	69	14.18	197	5.42	5.61	40.9	1.93	74.4	1	1	1	1	0	2	1	1	0	0	0	0	0	0	1	0	1	0	1	60	35	35	49	19	0	1	0	0	0	0
9	1	0	69	23.83	0	105	1	0	1	77	120	70	6.91	231	2.108	6.27	18	3.42	79	1	1	1	1	0	1	1	1	0	0	0	0	0	0	0	0	1	0	1	53	32	31	41	32	0	0	1	1	0	0
12	0	0	60	27.11	1	121	1	0	1	66	98	68	5.89	189	3.225	5.28	21	2.26	116	1	1	1	0	1	1	1	1	0	0	0	1	0	0	3	1	2	0	0	26	37	32	71	29	0	0	0	1	0	0
32	1	1	61	21.26	1	111	0	0	1	80	102	62	3.66	124	11.885	4.95	88	2.3	69	1	1	1	1	0	2	0	1	0	0	0	0	0	0	1	0	1	0	1	53	31	35	44	34	0	1	0	0	0	0
13	0	0	79	23.5556	0	129	1	0	0	64	150	80	7.53	96	0.305	4.26	6	2.3	69.3	1	1	1	1	0	1	0	0	0	0	0	0	0	0	0	0	1	0	1	65	33	35	49	19	0	1	0	0	0	0
9	0	0	64	24.2439	0	121	1	0	1	86	140	90	4.43	248	0.074	5.62	49.9	3.63	58	1	1	1	1	0	1	0	1	0	0	0	0	0	0	0	1	1	0	1	73	38	34	45	26	0	1	0	0	0	0
8	1	1	58	27.84	1	136	1	0	1	83	104	70	5.47	262	0.017	5.2	27	2.71	74	1	1	1	1	0	1	0	0	0	0	0	0	0	0	0	0	1	0	0	47	31	31	55	31	0	1	0	0	0	0
10	1	1	54	22.1003	0	128	1	0	1	75	130	76	7.01	155	1.66	4.72	19.6	1.94	101.9	1	1	1	1	0	1	0	0	0	0	0	0	0	0	2	1	1	0	0	69	21	32	40	15	0	1	0	0	0	0
5	1	1	58	25.26	1	146	1	1	1	90	155	86	18.59	290	5.472	7.26	40	2.8	75	1	1	1	0	1	2	1	1	0	0	0	0	1	0	1	0	0	0	0	54	33	30	49	29	0	1	0	0	0	0
8	0	1	62	22.77	1	111	1	0	0	87	103	72	7.01	133	11.943	5.19	47	2.39	99	0	1	1	0	1	1	0	0	0	0	0	0	0	0	1	1	0	0	0	43	34	30	49	34	0	1	0	0	0	0
17	0	1	77	29.05	0	128	1	0	0	78	128	85	6.42	96	2.691	5.84	42	2.11	85	0	1	1	1	0	1	0	1	0	0	0	0	0	0	0	0	0	0	0	48	46	37	53	32	0	1	0	1	0	0
10	1	1	72	23.4236	1	140	1	0	1	60	125	80	9.37	128	1.83	5.57	79.7	1.71	85	1	1	1	1	0	2	0	0	0	0	0	0	0	0	0	0	0	0	1	40	33	30	46	18	0	1	0	0	0	0
8	1	1	67	23.5743	1	132	1	1	0	84	130	80	11.54	283	0.2693	8.4	17	2.54	58.2	1	1	1	1	0	1	0	1	0	0	0	0	0	0	1	1	1	0	0	56	30	35	46	32	0	1	1	0	0	0
11	1	1	47	27.6601	1	159	1	0	0	62	150	80	6.77	150	0.031	4.45	35.3	2.91	71.2	1	1	1	1	0	1	0	0	0	0	0	0	0	0	1	0	1	0	1	51	36	35	49	19	0	1	1	0	0	0
12	0	0	69	29.24	0	128	0	1	1	70	120	80	6.7	270	0.006	7.39	13	3.98	83	1	1	1	1	0	1	1	1	0	0	0	0	0	0	1	0	1	0	1	74	36	32	44	29	1	1	1	0	0	0
11	0	1	43	27.5482	0	139	1	0	1	70	160	96	6.37	167	0.199	6.9	30.6	2.97	83	1	1	1	1	0	1	1	1	0	0	0	0	0	0	1	0	0	0	1	43	35	35	49	19	0	1	1	0	0	0
10	1	1	50	21.3039	0	145	1	0	1	56	135	75	9.85	215	0.013	6.2	62.9	3.13	62	1	1	0	0	0	1	0	1	0	0	0	0	0	0	0	0	0	0	1	78	37	39	44	21	0	1	0	0	0	1
7	1	1	67	23.15	1	134	0	0	1	70	100	60	11.16	197	1.856	5.45	15	2.9	141	1	1	1	0	1	2	0	0	0	0	0	0	0	0	0	0	0	0	1	65	32	28	44	28	0	1	0	0	0	0
5	0	0	69	21.2279	0	115	0	0	1	83	130	90	5.94	133	0.249	4.74	11.2	2.53	82	0	1	1	1	0	1	0	0	0	0	0	0	0	0	1	0	0	0	1	45	31	34	53	17	0	1	0	0	0	0
9	0	1	53	27.6398	0	122	0	0	0	53	95	65	11.24	215	1.47	3.4	55	2.92	79	1	1	1	1	0	2	0	1	0	1	0	0	0	0	0	0	0	0	1	66	30	37	43	18	0	1	0	0	0	1
6	1	1	49	21.77	1	124	1	1	1	90	174	123	8.77	211	8.468	5.19	45	2.86	69	1	1	1	1	0	1	0	1	0	0	0	0	0	0	1	0	0	0	1	60	31	29	48	29	0	1	1	0	0	0
12	1	1	55	22.4913	1	120	1	0	1	80	110	60	6.55	173	1.1	6.59	29.4	2.29	53	1	1	1	1	0	2	1	0	0	0	0	0	0	0	1	0	0	0	1	49	41	36	52	15	0	1	0	0	0	0
5	1	1	64	23.1675	0	136	0	0	0	47	86	60	11.08	318	0.1862	4.89	20	2.79	115.1	1	0	1	1	0	1	0	1	0	0	0	0	0	0	1	0	1	1	0	72	30	36	53	27	0	1	1	1	0	1
9	0	1	62	25.86	1	113	0	0	1	86	108	60	11.45	218	16	5.93	38	1.75	115	1	1	1	1	0	4	0	0	0	0	0	0	0	0	1	1	1	1	0	59	37	30	52	29	1	1	0	0	0	0
7	0	0	63	22.07	0	95	1	1	1	82	208	106	5.74	183	0.787	5.5	14	1.14	93	1	1	1	0	1	1	1	1	1	0	0	0	0	0	1	0	0	0	0	54	33	30	49	29	0	1	0	0	0	0
11	1	1	37	25.7117	1	129	1	0	1	75	95	60	12.44	243	1.18	5.38	103.1	2.91	61.9	1	1	1	1	0	1	0	0	0	0	0	0	0	0	1	0	0	0	1	52	35	36	50	16	0	0	1	0	0	0
8	1	1	71	22.7732	1	135	1	0	1	68	120	80	8.08	232	0.299	4.87	28.7	2.95	79	1	1	1	1	0	1	0	0	0	0	0	0	0	0	1	1	0	0	1	51	35	35	49	19	0	0	0	0	0	0
5	0	1	52	24.24	1	116	0	0	1	70	105	68	10.66	260	8.547	4.55	52	2.68	107	1	1	1	1	0	1	0	0	0	0	0	0	0	0	1	1	0	1	1	61	34	28	46	29	0	1	0	0	0	0
9	1	1	65	17.92	1	132	0	0	1	60	110	60	4.99	259	0.001	5.8	38	2.29	70	1	1	1	1	0	1	0	0	0	0	0	0	0	0	0	0	1	0	1	66	24	27	38	27	0	1	0	0	0	0
14	0	1	72	26.3465	0	161	1	0	1	82	170	86	6.26	95	0.339	8.44	20.3	2.89	126	0	1	1	1	0	2	0	1	0	0	0	0	0	0	1	1	1	0	1	64	36	29	46	17	1	0	1	0	0	0
8	1	1	50	23.4236	1	122	1	0	1	90	134	73	8.81	205	0.207	4.83	13.3	0.67	61.6	1	1	1	1	0	1	0	0	0	0	0	0	0	0	1	1	1	0	1	42	29	28	45	16	0	1	0	0	0	0
14	0	0	46	20.83	0	131	0	0	0	113	120	80	8.57	234	0.028	5.47	41.6	0.97	63	1	1	0	0	0	1	0	0	0	0	0	0	0	0	0	0	0	0	0	69	35	35	44	19	0	0	1	0	0	0
9	1	1	37	27.04	1	145	1	0	1	74	115	70	10.96	260	16	5.98	62	2.52	75	0	1	1	0	1	1	0	0	0	0	0	0	0	0	1	0	0	0	0	54	33	30	49	29	0	1	1	0	0	0
10	1	1	72	22.4228	0	103	0	0	0	56	99	45	6.71	75	0.1052	5.59	16	2.2	75	1	1	1	1	0	1	0	0	0	0	0	0	0	0	1	1	1	0	1	40	36	30	56	26	1	1	0	0	0	1
6	0	1	58	27.94	0	149	1	0	1	63	142	90	12.05	201	5.014	8.57	34	2.37	83	1	0	1	1	0	1	1	1	0	0	0	0	0	0	1	0	1	0	1	58	35	30	51	31	0	1	1	0	0	0
22	0	0	67	24.44	1	126	1	1	1	77	140	71	10.29	145	7.409	5.9	22	4.05	78	1	1	1	0	1	1	1	1	0	0	0	0	0	0	0	0	0	0	1	54	31	30	48	30	1	0	1	0	0	0
4	0	1	75	23.4236	1	105	0	0	1	87	110	75	5.77	140	0.068	5.19	59.7	2.16	89.8	0	1	1	1	0	2	1	0	0	0	0	0	0	0	1	1	1	1	1	63	30	38	40	16	0	1	0	0	0	0
7	0	1	70	29.48	0	154	1	0	1	95	160	90	9.39	260	2.296	7.47	48	3.31	84	0	1	1	0	1	1	1	1	0	0	0	0	0	0	0	1	0	0	0	51	39	32	50	31	0	1	0	0	0	0
9	1	0	50	23.0812	0	103	1	0	1	74	100	60	6.79	207	0.2542	18.5	15	3.8	59.2	1	1	1	0	0	1	0	0	0	0	0	0	0	0	1	0	0	0	0	34	29	33	47	24	1	1	0	0	0	0
4	0	1	33	28.76	0	148	1	0	1	51	100	52	8.73	323	0.566	5.14	56	2.43	71	1	1	1	1	0	1	0	0	0	0	0	0	0	0	0	0	1	0	0	73	29	29	44	27	0	1	1	0	0	1
9	1	1	39	28.34	1	162	1	0	1	107	145	84	17.67	255	8.922	4.65	73	3.19	30	1	1	1	0	1	1	0	1	0	0	0	0	0	0	0	0	1	0	0	42	33	35	55	31	0	1	0	0	0	0
6	0	0	86	23.0875	0	103	1	0	0	64	130	90	6.15	193	0.1922	7.03	16	3.93	82.9	1	1	1	1	0	1	0	0	0	0	0	0	0	0	1	1	1	1	0	48	38	28	44	25	1	1	1	0	0	0
16	1	1	72	22.6757	1	143	0	1	1	100	160	130	7.91	177	0.022	6.86	41.6	2.77	100	1	1	1	1	0	1	0	1	1	0	0	0	0	0	0	1	1	0	1	60	35	35	49	19	0	0	1	0	0	0
9	1	1	82	22.04	1	121	1	1	0	67	134	65	7.1	220	0.193	6.76	9	1.66	147	1	1	1	0	1	2	1	1	0	0	0	0	0	0	1	1	1	0	0	52	37	27	42	31	0	1	1	0	0	0
8	1	1	53	23.44	1	143	1	0	1	76	121	74	15.21	257	11.064	6.64	48	1.98	81	1	1	1	1	1	1	0	0	0	0	0	0	0	0	1	0	1	0	0	48	35	30	47	30	0	1	1	0	0	0
6	1	1	59	23.9605	0	116	0	0	0	84	140	90	9.11	117	0.06988	6.93	21	0.52	93.6	1	1	1	0	0	1	0	0	0	0	0	0	0	0	1	0	1	1	1	64	38	34	51	33	0	1	1	0	0	0
8	0	1	52	26.8923	1	142	0	0	0	63	136	85	9.34	216	0.385	8.8	28.2	0.99	79.6	1	1	0	0	0	1	0	0	0	0	0	0	0	0	1	0	0	0	0	63	33	31	42	19	0	1	0	0	0	0
6	0	1	41	23.7357	0	132	1	1	1	72	120	70	8.37	305	0.1644	6.35	46	1.51	136	1	1	1	0	0	1	0	0	0	0	0	0	0	0	1	0	0	0	0	58	30	30	50	27	0	1	0	0	0	0
14	0	1	64	23.44	1	123	1	0	0	80	120	80	6.82	152	0.623	5.18	9	1.88	96	0	1	1	1	0	2	0	0	0	0	0	0	0	0	1	1	1	0	0	74	35	25	49	26	0	1	0	0	0	0
7	1	1	61	24.2477	0	119	1	0	0	80	110	60	8.66	170	0.3049	9.06	46	2.59	70	1	1	1	1	0	1	0	0	0	0	0	0	0	0	2	0	0	0	0	74	30	30	51	21	1	1	1	0	0	0
4	1	0	76	23.4236	0	118	1	0	1	80	150	80	14.39	199	1.28	9.16	46.5	3.51	53	1	1	1	1	0	2	0	1	0	0	0	0	0	0	1	0	1	0	1	52	35	32	48	18	0	1	0	0	0	0
8	1	1	63	24.48	0	125	1	1	1	85	141	80	11.31	198	0.1291	12.61	48	3.05	81	1	1	1	1	0	2	0	0	0	0	0	0	0	0	1	1	1	1	1	60	41	38	46	37	0	1	0	0	0	0
11	0	1	56	25.9516	0	100	1	1	1	84	146	98	5.68	201	4.02	4.65	20.6	1.84	130.3	1	1	1	1	0	1	0	1	0	0	0	0	0	0	1	0	1	0	1	52	37	35	53	23	0	0	1	0	0	0
11	1	0	57	21.09	0	117	1	0	1	67	90	61	6.87	177	4.625	7.16	81	3.93	67	1	1	1	0	1	2	0	0	0	0	0	0	0	0	1	1	1	0	0	53	29	33	45	31	0	1	0	0	0	0
15	0	0	78	22.8928	0	104	1	0	1	108	120	70	4.61	133	0.078	5.05	5.7	0.98	79	1	1	1	1	0	1	0	1	0	0	0	0	0	0	1	1	1	0	1	68	35	30	41	18	0	0	1	0	0	0
13	1	1	69	22.5948	1	96	1	0	0	52	90	60	6.18	103	1.507	4.86	50	1.55	112	1	1	1	0	0	1	0	0	0	0	0	0	0	0	1	1	1	0	1	60	32	33	45	32	0	0	1	1	0	1
17	1	1	72	27.04	1	108	1	0	1	80	148	78	11.88	211	9.882	7.61	53	2.36	117	1	1	1	1	0	3	0	1	0	0	0	0	0	0	1	1	0	0	0	38	39	35	57	33	0	1	1	1	0	0
9	0	1	58	26.5731	1	143	0	0	1	72	90	70	7.97	196	0.623	5.83	17.5	3.03	70.3	1	1	1	1	0	1	0	0	0	0	0	0	0	0	0	1	1	0	1	52	29	35	51	17	0	1	0	0	0	0
4	0	1	52	20.9366	1	141	1	1	1	80	130	90	7.86	233	0.199	4.8	19.8	1.78	71	0	1	1	1	0	1	0	0	0	0	0	0	0	0	1	0	1	0	1	51	35	35	49	19	0	1	0	0	0	0
12	1	1	67	27.34	0	153	1	0	1	97	137	92	8.53	202	2.515	11.98	382	1.88	126	0	1	1	1	0	2	1	1	0	0	0	0	0	0	1	1	1	0	0	52	37	34	57	32	0	0	0	0	0	0
29	0	1	75	22.3042	0	114	0	0	1	75	100	60	11.09	201	2.08	19.29	23	2.62	268.2	1	1	1	1	0	3	0	0	0	0	0	0	0	0	2	0	0	1	0	48	29	26	45	26	0	1	0	0	0	0
16	1	1	60	24.7675	0	132	1	0	0	110	124	70	11.33	271	2.49	8.4	39.14	2.7	70.6	1	1	1	1	0	3	0	0	0	0	0	0	0	0	1	0	0	0	0	18	39	40	70	25	0	0	1	1	0	0
13	1	0	53	23.4236	0	149	1	0	0	105	150	110	19.41	224	3.6	5.74	31.7	3.12	86	1	1	1	1	0	3	0	1	0	0	0	0	0	1	1	0	1	0	1	51	35	35	49	19	0	1	0	0	0	0
10	0	1	52	29.74	0	134	1	1	1	70	144	88	8.45	202	4.542	5.41	32	2.17	107	1	1	1	1	1	1	0	1	0	0	0	0	0	0	1	0	1	0	0	50	35	33	50	34	0	1	0	0	0	0
12	1	0	66	23.1064	0	113	0	0	0	76	145	85	6.58	219	0.1767	7.47	20	3.78	59.7	1	1	1	1	0	1	0	1	0	0	0	0	0	0	1	0	0	0	0	50	30	30	48	27	0	1	1	0	0	0
8	0	1	67	23.4236	1	146	1	1	1	75	180	90	8.24	155	0.034	6.58	23.6	1.98	100.6	0	1	1	1	0	2	0	1	0	0	0	0	0	0	1	0	1	0	1	67	39	36	51	21	0	1	0	0	0	0
5	1	0	63	21.6413	0	130	1	0	1	115	138	97	19.48	200	0.921	16.2	22.9	2.72	57.6	0	1	1	1	0	2	1	0	0	0	0	0	0	0	2	0	2	0	1	44	38	34	55	19	0	0	1	1	0	0
12	0	1	60	25.3515	1	144	1	0	1	72	140	90	5.68	159	0.073	5.51	13.8	2.77	99.3	0	1	1	1	0	1	0	0	0	0	0	0	0	0	0	0	0	0	0	71	32	36	49	17	0	1	0	0	0	0
11	0	1	67	26.5731	0	127	1	1	1	80	150	90	5.19	102	1.38	7.43	13.2	1.94	106	1	1	1	1	0	1	1	1	0	0	0	0	0	0	1	0	1	0	1	51	35	35	49	19	0	1	0	0	0	0
16	0	0	62	22.6562	0	137	1	0	1	102	160	90	8.7	211	0.194	5.59	18.9	2.88	55	1	1	1	1	0	1	0	0	0	0	0	0	1	0	1	0	1	0	1	70	30	30	47	18	0	1	0	0	0	0
12	1	0	76	24.5578	0	107	1	0	1	65	116	95	5.22	209	0.283	5.37	9.5	3.34	95	0	1	1	1	0	2	0	0	0	0	0	0	0	0	2	1	1	0	1	36	35	35	58	19	0	1	0	1	0	0
8	1	1	79	23.4236	1	114	1	0	1	90	130	90	13.68	225	2.95	6.69	18.5	0.99	114.8	0	1	1	1	0	3	1	1	0	0	0	0	0	1	1	0	1	0	1	29	48	42	72	17	0	0	1	1	0	0
8	0	1	63	26.4381	1	134	1	0	1	104	200	120	9.37	202	0.177	11.68	10	2.65	111.5	0	1	1	1	0	2	0	0	0	0	0	0	0	0	1	0	1	0	1	45	37	31	50	16	0	0	1	1	0	0
10	1	1	61	27.6817	0	131	1	0	1	75	154	74	6.24	209	0.336	5.97	54.6	3.28	79	1	1	1	1	0	1	0	1	0	0	0	0	0	0	1	0	0	0	1	51	35	35	49	19	0	1	0	0	0	0
10	1	1	55	23.8751	0	150	0	0	1	55	108	85	13.93	203	0.053	4.79	18.3	1.88	90	1	1	1	1	0	1	0	1	0	0	0	0	0	0	1	0	0	0	1	70	28	33	43	16	0	0	1	0	0	1
7	0	1	65	23.4236	1	135	1	0	1	78	140	80	9.21	160	0.307	5.43	26.4	1.73	77	1	1	1	1	0	2	0	1	0	0	0	0	0	0	2	0	1	0	1	61	36	32	48	22	0	1	0	0	0	0
20	1	0	72	18.7305	0	109	0	0	1	101	102	70	8.92	173	7.08	5.26	101.4	1.19	90	1	1	1	1	0	2	0	1	0	0	0	0	0	0	1	0	1	0	1	39	31	39	45	19	0	1	1	0	0	0
8	1	0	72	21.4844	0	118	1	0	1	60	120	60	3.31	186	1.18	6.86	41.6	2.77	69	1	1	1	1	0	1	0	1	0	0	0	0	0	0	0	0	0	0	1	51	35	35	49	19	0	1	1	0	0	0
9	1	1	58	25.3906	0	126	0	0	0	60	106	78	7.82	287	0.942	4.36	57.5	0.98	79.2	1	1	1	0	1	1	0	0	0	0	0	0	0	0	1	0	1	0	1	40	39	38	50	18	0	1	0	0	0	0
9	0	1	66	22.7001	1	113	0	0	0	78	96	60	11.66	145	2.834	6.51	37	4.69	82	0	1	1	0	0	1	0	0	0	0	0	0	0	0	0	0	2	0	0	56	28	38	45	24	0	1	1	0	0	0
6	0	1	51	19.03	1	152	1	0	0	54	120	88	8.41	264	0.01	6.18	30	1.82	97	1	1	1	0	1	1	0	1	0	0	0	0	0	0	0	0	0	0	1	54	33	32	53	34	0	1	1	0	0	1
9	0	1	36	24.61	0	116	1	1	1	73	142	96	5.42	192	6.485	3.57	16	1.94	83	1	1	1	1	0	1	0	1	0	0	0	0	0	0	1	1	1	0	0	72	29	28	51	27	0	1	0	0	0	0
16	1	0	75	23.1911	0	138	1	1	1	65	120	80	8.12	166	6.46	10.83	14.7	3.47	78	1	1	1	1	0	1	1	1	0	0	0	0	0	0	1	1	1	0	1	57	38	30	45	18	0	1	0	0	0	0
10	1	1	55	22.9854	1	139	1	0	1	80	110	65	6.87	163	0.045	5.92	30.1	2.96	78.2	1	1	1	1	0	1	0	1	0	0	0	0	0	0	0	0	1	0	1	54	30	33	40	20	0	1	0	0	0	0
10	1	1	70	19.4674	1	115	0	0	1	102	130	80	9.5	255	2.42	6.86	182.3	2.77	90	1	1	1	1	0	1	0	0	0	1	0	0	0	0	0	0	1	0	1	55	34	36	42	18	0	1	0	0	0	0
15	0	1	87	22.23	1	133	1	1	1	91	150	81	6.19	183	2.391	5.35	19	2.87	114	1	1	1	1	0	3	0	1	0	0	0	0	0	0	1	1	1	0	0	31	47	34	58	32	0	0	0	1	0	0
6	0	1	69	25.1559	1	145	0	0	0	76	130	70	6.47	138	0.09	5.64	15	2.99	64.1	1	1	1	1	0	1	0	0	0	0	0	0	0	0	1	0	1	0	1	51	35	35	49	19	0	1	0	0	0	0
17	0	1	55	26.6436	0	158	0	1	0	70	125	75	5.39	212	0.175	5.14	10	3.68	82	0	1	1	1	0	1	0	1	0	0	0	0	0	0	0	0	0	0	1	67	36	30	48	20	0	0	1	0	0	0
8	1	1	65	23.4236	1	133	0	0	0	52	120	80	11	268	0.524	5.79	87.6	2.4	78.2	1	1	1	1	0	2	0	1	0	1	0	0	0	0	1	0	1	1	1	62	35	43	44	20	0	1	0	0	0	1
14	0	0	67	25.3333	0	124	0	0	1	88	150	90	6.37	227	0.166	5.17	12.8	2.25	61	1	1	1	1	0	1	0	0	0	0	0	0	0	0	1	0	1	0	1	58	33	28	47	16	0	1	0	0	0	0
11	1	1	65	20.0288	1	142	1	0	1	70	130	80	13.23	142	0.017	3.4	36.9	2.8	154	1	1	1	1	0	1	0	1	0	0	0	0	0	0	1	0	1	0	1	56	31	37	44	20	0	1	0	0	0	0
20	1	1	45	23.5078	1	141	1	0	1	62	135	90	11.94	217	0.309	5.75	60.3	3.21	73	1	1	1	1	0	2	0	1	0	0	0	0	0	0	1	0	1	0	1	58	34	27	47	19	0	1	0	0	0	0
8	0	0	78	23.83	0	112	1	0	1	71	148	98	7.62	196	1.761	4.56	68	1.69	80	0	1	1	1	0	1	0	1	0	0	0	0	0	0	1	0	0	1	1	72	31	27	49	25	0	1	0	0	0	0
10	1	0	76	23.4236	0	124	1	0	1	79	140	70	11.39	135	0.081	7.28	41.6	3.07	53.8	1	1	1	1	0	1	0	1	0	0	0	0	0	0	1	1	1	1	1	53	33	34	50	19	0	1	0	0	0	0
7	0	1	72	23.74	1	111	1	0	1	68	145	85	9.48	145	14.983	5.08	46	2.25	248	0	1	1	0	1	1	0	0	0	0	0	0	0	0	1	1	1	0	0	52	39	32	51	31	0	0	1	0	0	0
6	1	0	67	22.06	0	113	1	0	1	94	149	81	10.99	215	8.714	6.31	21	2.18	65	1	1	1	0	1	1	0	1	0	0	0	0	0	0	1	0	0	0	0	54	33	30	49	29	0	1	1	0	0	0
5	0	1	67	23.3844	0	130	1	0	0	70	165	90	5.77	150	0.972	6.86	21.1	2.16	72	1	1	1	1	0	2	0	1	0	0	0	0	1	0	1	0	1	0	1	56	39	37	58	19	0	0	0	0	0	0
7	0	1	60	27.36	0	139	1	0	1	67	120	70	9.03	167	0.005	7.55	42	1.72	78	1	1	1	1	0	1	1	0	0	0	0	0	0	0	0	0	0	1	1	63	34	29	44	34	0	1	0	0	0	0
12	0	1	65	22.3081	0	127	1	0	1	78	158	96	5.45	103	0.079	5.72	12	3.39	117.7	1	1	1	1	0	1	0	1	0	0	0	0	0	0	0	1	1	0	1	63	34	33	57	17	0	0	1	0	0	0
13	1	1	65	21.0077	1	135	1	1	1	67	140	80	5.8	249	0.027	4.45	16.4	3.67	101	1	1	1	1	0	1	0	1	0	0	0	0	0	0	0	0	1	0	1	58	35	29	49	16	0	0	1	0	0	0
9	0	0	67	22.6667	1	116	1	0	1	120	165	117	10.48	148	1.12	5.85	47.2	3.01	81	0	1	1	1	0	2	0	0	0	0	0	0	0	0	1	1	1	0	1	33	35	35	55	19	0	0	1	0	0	0
18	0	0	78	22.8928	0	126	0	0	1	98	100	80	16.94	178	1.46	4.28	15.1	1.06	89	1	1	1	1	0	2	0	1	0	0	1	0	0	0	0	0	0	0	1	52	39	38	54	19	0	1	0	0	0	0
8	1	1	60	21.45	1	150	1	0	1	204	120	80	6.19	180	0.066	5.39	27	1.1	58	0	1	1	1	0	1	0	0	0	0	0	0	0	0	1	1	1	0	1	55	33	33	51	31	0	1	0	0	0	0
6	0	1	55	23.4236	1	134	0	0	0	66	119	75	8.92	150	0.323	6.27	17.2	2.33	71	1	1	1	1	0	2	1	0	0	0	0	0	0	0	1	0	1	0	0	56	36	34	47	20	0	1	0	1	0	0
6	0	1	64	23.1745	0	133	1	1	1	76	145	90	9.19	220	0.4625	9.31	37	6.32	79.1	1	1	1	1	0	1	0	0	0	0	0	0	0	0	0	1	1	0	1	56	25	30	45	25	1	1	0	0	0	0
11	1	1	68	19.71	1	113	1	0	1	77	110	66	6.91	400	0.317	4.67	45	2.19	95	1	1	1	1	0	2	1	1	0	0	0	0	0	0	1	0	1	0	0	32	36	35	55	32	0	1	0	0	0	0
8	0	1	52	29.98	1	147	1	0	1	67	116	70	5.94	202	2.111	5.31	38	2.73	92	0	1	1	1	0	1	0	0	0	0	0	0	0	0	0	0	0	0	1	63	33	30	43	30	0	1	0	0	0	0
7	1	1	53	24.51	1	146	0	0	1	65	135	96	9.24	229	2.559	9.46	81	1.6	76	1	1	1	0	1	1	1	1	0	0	0	0	0	0	0	0	0	0	0	47	28	27	45	28	1	1	0	0	0	0
5	1	1	78	23.5964	1	118	1	0	1	85	180	90	8.09	167	0.02174	8.4	22	2.17	92	0	1	1	0	0	2	0	1	0	0	0	0	0	0	2	1	2	0	0	34	39	49	67	32	0	1	1	1	0	0
7	1	1	69	24.8	0	141	0	0	1	72	102	68	6.45	116	16	4.5	7	2.8	85	1	1	1	1	0	1	0	0	0	0	0	0	0	0	1	0	1	1	0	43	30	34	50	28	0	1	0	0	0	0
11	1	1	78	17.5781	1	109	0	0	0	50	110	65	12.46	122	3.91	3.62	6.9	0.85	100	0	1	1	1	0	2	0	1	0	0	0	0	0	0	1	1	3	0	1	46	36	44	43	26	0	1	0	0	0	1
16	0	1	39	24.9135	1	156	1	0	1	76	130	90	11.13	187	1.07	22.05	41.6	2.77	87	1	1	1	1	0	1	0	0	0	0	0	0	0	0	0	0	0	0	1	62	36	33	47	20	0	1	0	0	0	0
5	0	0	76	25.3333	0	128	1	0	1	68	130	80	11.2	159	0.474	6.86	41.6	2.77	84.1	1	1	1	1	0	1	1	1	1	0	0	0	0	0	1	0	1	0	1	49	39	34	55	18	0	1	0	0	0	0
9	1	0	58	19.5312	0	106	1	0	1	66	145	90	10.29	218	0.044	6.45	71.4	2.99	59.7	1	1	1	1	0	1	0	0	0	0	0	0	0	0	1	1	1	0	1	51	32	32	42	18	0	1	1	0	0	0
1	1	1	69	23.4236	0	127	1	0	1	75	120	85	9.02	152	0.199	7.98	13.5	1.69	104.9	1	1	1	1	0	2	0	1	0	0	0	0	0	1	1	0	1	0	1	51	35	35	49	19	0	1	0	0	0	0
14	1	1	65	23.4236	1	157	1	0	1	95	135	85	12.01	153	2.61	12.63	62.3	3.02	69	0	1	1	1	0	1	1	0	0	0	0	0	0	0	1	1	1	0	1	60	34	30	39	16	0	1	0	0	0	0
5	1	1	50	28.3447	1	133	1	0	1	75	100	60	7.51	290	0.211	4.65	137.4	3.31	85.9	1	1	1	1	0	1	0	0	0	0	0	0	0	0	1	0	1	0	1	63	35	35	42	19	0	1	0	0	0	0
7	0	1	65	24.1751	0	136	0	0	1	122	125	89	5.23	214	0.01498	9.45	31	2.69	84.5	1	1	1	0	1	1	0	0	0	0	0	0	0	0	1	0	1	0	0	58	35	30	42	26	1	0	1	1	0	0
14	1	1	64	22.23	1	118	0	0	0	80	100	50	9.5	244	1.333	5.14	29	3.54	79	1	1	1	1	0	2	0	1	0	0	0	0	0	0	1	0	0	1	1	58	33	29	52	31	1	1	0	0	0	0
8	0	1	66	23.03	1	125	1	0	1	72	149	89	8.24	227	1.877	4.74	15	2.43	43	0	1	1	1	0	1	0	1	0	0	0	0	0	0	0	2	0	0	0	69	30	31	50	31	0	1	0	0	0	0
13	1	1	61	17.63	1	118	1	0	1	82	148	74	6.99	298	1.536	5.4	25	1.54	69	1	1	1	1	0	1	0	0	0	0	0	0	0	0	0	0	1	0	1	67	31	30	44	27	0	1	0	0	0	0
12	1	1	67	23.4236	1	155	1	0	1	82	130	90	10.8	191	0.786	10.68	47.8	3.24	77	1	1	1	1	0	2	0	1	0	0	0	0	0	0	1	1	1	0	1	49	37	36	49	17	0	1	0	0	0	0
6	0	1	62	24.92	0	145	1	1	1	56	136	79	10.94	198	9.121	5.41	33	3.25	95	1	1	1	0	1	1	0	1	0	0	0	0	0	0	1	1	0	1	1	67	34	32	42	28	1	1	1	0	0	1
5	1	1	80	22.1916	0	113	0	0	0	77	122	72	6.84	128	2.989	9.98	14	1.9	73.8	0	1	1	1	0	4	0	1	0	0	0	0	0	0	1	0	1	0	0	57	31	33	48	24	0	1	1	0	0	0
12	0	1	79	22.4913	1	118	1	0	1	67	180	100	9.94	128	0.228	4.38	41.6	1.56	102	0	1	1	1	0	2	0	0	0	0	0	0	0	0	1	0	1	0	1	67	35	35	44	19	0	1	0	0	0	0
21	1	1	66	21.16	1	161	0	0	1	109	90	42	15.91	214	9.469	9.17	82	5.68	95	1	1	1	0	1	4	0	0	0	0	0	0	0	0	0	0	0	0	1	54	40	31	50	28	1	1	0	0	0	0
9	1	1	46	23.5294	1	151	1	0	1	78	130	87	9.11	156	0.142	7.21	86.7	3.26	102.1	1	1	1	1	0	1	0	1	0	0	0	0	0	0	1	0	1	0	1	46	33	52	41	26	0	1	0	0	0	0
5	1	1	60	23.4236	1	141	1	0	1	85	145	90	10.6	218	4	6.73	60.2	3.12	83	1	1	1	1	0	2	0	1	0	0	0	0	0	0	1	0	1	0	1	45	32	30	46	18	0	1	0	0	0	0
11	0	1	51	23.4236	0	147	1	0	1	85	108	70	14.7	319	5.41	5.21	75.8	2.6	79	1	1	1	1	0	1	0	1	0	0	0	0	0	0	1	0	0	0	1	53	36	37	47	17	0	0	1	0	0	0
9	1	0	59	28.125	1	125	1	0	0	87	155	97	8.85	279	0.095	9.7	63	2.77	69	1	1	1	1	0	1	1	1	0	0	0	0	0	0	2	0	1	0	1	40	39	35	53	20	0	1	0	0	0	0
11	1	1	60	23.9326	1	131	1	0	1	72	100	80	7.5	67	0.8891	15.98	40	1.91	70.7	1	1	1	1	0	2	1	0	0	0	0	0	0	0	1	0	0	0	0	49	30	28	46	25	0	1	0	1	0	0
7	0	1	68	23.44	1	133	1	0	1	69	128	66	9.82	154	10.951	8.78	20	2.37	97	1	1	1	0	1	2	1	0	0	0	0	0	0	0	0	0	0	0	1	64	24	27	40	26	0	1	0	0	0	0
7	0	1	72	27.73	1	118	1	0	0	66	210	100	8.24	186	1.997	3.51	56	2.05	126	0	1	1	1	0	1	0	1	1	0	0	0	0	0	2	0	1	0	0	48	41	35	59	31	0	1	0	0	0	0
14	1	1	75	21.9713	1	151	1	0	1	73	162	91	15.81	149	8.04	7.52	54.1	3.27	142	1	1	1	1	0	2	1	1	0	0	0	0	0	0	1	1	2	0	1	29	41	39	59	17	0	1	0	0	0	0
9	1	0	61	20.83	0	122	0	0	1	78	124	80	15.2	218	16	7.06	39	3.99	58	0	1	1	0	1	3	0	0	0	0	0	0	0	0	1	0	1	1	0	29	35	35	48	32	0	1	0	1	0	0
10	1	1	74	22.6942	1	122	1	0	1	76	150	80	10.52	138	3.726	11.01	37	2.94	78.2	0	1	1	0	0	1	0	0	0	0	1	0	0	0	2	1	2	0	0	43	42	34	49	22	0	1	0	1	0	0
10	1	1	54	21.04	1	126	0	0	1	74	94	54	19.4	273	16	6.04	94	2.86	85	1	1	1	0	1	4	0	0	0	0	0	0	0	0	0	0	1	0	0	45	30	33	49	31	0	1	1	0	0	0
8	0	0	72	24.24	0	74	1	1	1	84	122	68	7.57	323	0.44	5.13	12	2.6	194	0	1	1	0	1	3	1	1	0	0	0	1	1	0	3	1	1	0	0	40	44	34	63	35	0	0	1	1	0	0
14	1	0	82	19.91	1	133	1	0	1	75	140	70	10.38	221	0.727	5.5	51.8	4.33	57	1	1	1	1	0	2	0	0	0	0	0	0	0	0	1	1	1	0	1	59	33	29	44	17	0	1	0	0	0	0
9	1	1	61	21.42	1	135	0	0	1	69	96	57	10.08	273	0.083	5.04	23	2.77	104	1	1	1	0	1	1	0	0	0	0	0	0	0	0	1	1	1	1	0	40	32	30	45	25	1	1	1	0	0	0
5	1	1	65	23.4236	1	140	1	0	1	65	110	65	15.25	176	2.35	3.41	17	2.77	92	0	1	1	1	0	2	0	1	1	0	0	0	0	0	1	1	2	0	1	47	34	40	50	18	0	0	0	0	0	0
6	0	1	35	26.23	1	156	1	0	1	80	125	80	9.02	258	0.442	5.41	58	3.86	69	1	1	1	1	0	1	0	1	0	0	0	0	0	0	0	0	0	0	1	63	35	35	51	35	0	1	0	0	0	0
14	1	1	60	19.63	1	112	1	0	0	66	83	54	5.43	184	16	6.63	45	2.51	94	1	1	1	1	0	4	0	0	0	1	0	0	0	0	0	0	1	0	0	53	24	27	43	28	0	1	0	0	0	0
6	0	1	73	23.4236	1	131	1	0	0	58	92	60	6.51	204	0.284	4.62	7.2	2.44	101.8	1	1	1	1	0	1	0	0	0	0	0	0	1	0	0	0	0	0	1	51	35	35	49	19	0	1	0	0	0	1
2	1	0	62	22.51	0	118	1	1	1	115	156	101	11.84	247	13.205	4.78	29	3.23	56	0	1	1	1	0	2	0	1	0	0	0	0	0	0	1	0	0	0	0	54	33	30	49	29	1	1	0	0	0	0
19	1	1	53	24.8325	1	126	0	1	1	93	101	72	14.3	401	0.1513	8.31	127	2.45	91.2	1	1	1	1	0	1	0	1	0	1	0	0	0	0	1	0	0	0	1	57	31	32	44	26	0	1	0	0	1	0
6	0	0	60	24.44	0	129	1	0	1	83	83	54	9.03	202	1.863	6.8	43	1.91	57	1	1	1	1	0	1	0	0	0	0	0	0	0	0	1	0	0	0	0	52	30	27	44	24	1	1	0	0	0	0
8	1	1	45	24.7226	1	135	1	0	1	74	134	92	7.24	125	0.4136	5.42	27	2.33	72.2	1	1	1	1	0	1	0	0	0	0	0	0	0	0	0	0	0	0	0	60	32	35	43	34	0	1	0	0	0	0
13	0	1	65	23.24	0	140	1	1	1	57	152	80	10.13	173	8.965	6.6	21	2.17	79	1	1	1	1	0	1	1	1	0	0	0	0	1	0	0	0	0	0	1	75	30	30	46	30	0	0	0	0	0	1
14	1	1	51	30.86	1	125	1	0	0	66	110	70	12.1	277	0.107	4.64	25	3.22	74	1	1	1	1	0	1	0	1	0	0	0	0	0	0	1	0	1	0	0	34	37	38	57	31	0	1	0	0	0	0
5	1	1	68	26.03	1	127	1	0	1	71	190	110	6.42	147	14.745	7.87	19	3.09	77	0	1	1	1	0	1	1	1	0	0	0	0	0	0	1	0	0	0	0	54	33	30	49	29	1	0	1	0	0	0
9	1	1	47	27.13	1	134	1	0	0	64	105	68	13.68	245	16	5.48	48	1.87	91	0	1	1	1	1	1	0	1	0	0	0	0	0	0	1	0	1	1	0	47	37	34	55	35	0	0	1	0	0	0
6	0	1	45	22.7204	1	133	0	0	1	67	120	82	12.11	215	0.086	12.19	21.2	3.66	75	0	1	1	1	0	1	1	0	0	0	0	0	0	0	0	0	0	0	1	45	35	35	49	19	0	1	0	0	0	0
9	1	1	58	22.4813	1	143	0	0	0	58	105	65	12.88	175	0.42	6.37	22.5	2.9	79.2	1	1	1	1	0	1	0	0	0	0	0	0	0	0	1	0	1	0	0	61	36	38	43	18	0	1	0	0	0	1
14	1	0	71	24.41	0	131	1	0	1	72	119	68	11.47	232	16	7.27	39	2.5	67	0	1	1	1	0	1	1	1	0	0	0	0	0	0	1	0	0	0	0	33	34	28	48	25	1	1	0	0	0	0
8	0	1	35	32.74	1	126	1	0	1	82	120	80	9.28	217	5.437	5.61	30	6.55	96	1	1	1	1	0	1	0	0	0	0	0	0	0	0	1	0	1	0	0	58	34	30	48	31	1	1	1	0	0	0
10	1	1	63	23.4236	1	140	1	0	1	55	130	90	9.38	102	0.163	6.36	33.3	2.6	90.9	1	1	1	1	0	1	0	0	0	0	0	0	0	0	1	0	0	0	1	50	32	39	53	19	0	1	0	0	0	1
14	0	1	61	26.3702	0	114	0	0	0	80	130	80	8.35	153	4.28	7.68	31.4	3.92	87.3	1	1	1	0	0	1	1	0	1	0	0	0	0	0	1	0	1	0	1	51	35	35	49	19	0	1	1	0	0	0
11	0	1	45	27.2817	0	155	1	0	1	92	120	100	9.98	249	0.13	4.52	49	4.83	86.1	0	1	1	1	0	1	0	1	0	0	0	0	0	0	0	0	0	0	1	60	30	33	43	17	0	0	1	0	0	0
10	1	1	73	24.22	0	133	1	0	1	80	143	86	10.37	408	16	9.11	30	2.33	76	1	1	1	1	0	2	1	1	1	0	0	0	0	0	1	0	1	0	0	50	31	32	55	29	0	1	0	0	0	0
7	1	1	70	24.8016	0	132	1	1	1	72	130	70	5.52	145	0.167	4.61	18.1	3.73	71	1	1	1	1	0	1	0	1	0	0	0	0	0	0	1	1	1	0	1	51	38	35	64	19	0	1	0	0	0	0
14	1	0	76	26.0375	0	113	1	0	0	100	155	105	9.22	169	0.444	6.17	4.9	2.56	87	0	1	1	1	0	1	0	1	0	0	0	0	0	0	1	0	1	0	1	35	44	36	52	19	0	1	0	1	0	0
15	0	0	63	21.9289	0	128	1	0	1	68	128	76	6.93	234	0.105	5.49	24.2	4.22	69	1	1	1	1	0	1	0	0	0	0	0	0	0	0	0	0	0	0	1	69	24	27	39	16	0	0	1	1	0	0
9	0	1	77	23.4236	1	119	0	0	0	75	130	80	8.04	164	0.003	8.39	13.6	2.93	80	1	1	1	1	0	1	0	0	0	0	0	0	0	0	0	1	0	0	1	42	31	37	46	9	0	1	0	0	0	0
10	0	1	75	23.4236	1	99	0	0	0	90	125	75	6.59	117	1.29	5.34	33.1	1.51	93	0	1	1	1	0	2	0	0	0	0	0	0	0	0	1	1	1	0	1	51	35	35	49	19	0	0	1	0	0	0
9	1	1	54	23.8566	0	144	0	0	1	82	150	88	9.66	147	0.4228	8.25	38	1.69	64.8	0	1	1	1	0	1	0	0	0	0	0	0	1	0	1	1	0	0	0	40	32	32	47	24	0	1	1	0	0	0
16	0	1	71	20	0	110	1	0	1	78	138	86	12.72	163	0.62	5.01	15.7	3.01	55.6	0	1	1	1	0	2	0	1	0	0	0	0	0	0	1	1	1	0	1	38	40	36	56	19	0	1	0	0	0	0
10	1	1	71	23.2149	1	114	0	0	0	78	144	63	11.2	145	3.457	13.57	39.14	1.83	92	1	1	1	1	0	1	1	1	0	0	0	0	0	0	1	0	0	0	1	58	29	27	42	26	0	1	0	0	0	0
8	0	0	60	26.7094	0	94	1	0	1	100	138	85	6.61	123	0.324	13.8	18.6	3.13	53	1	1	1	1	0	2	1	0	0	0	0	0	0	0	0	0	0	0	1	51	36	35	49	19	0	1	0	1	0	0
16	1	0	60	23.6245	0	132	0	0	1	85	160	80	10.92	239	0.3017	17.58	54	4.74	83.1	1	1	1	1	0	2	0	1	0	0	0	0	0	0	1	1	1	1	0	54	28	28	41	26	1	1	1	0	0	0
4	1	1	50	23.6124	1	139	1	0	0	74	130	100	9.49	264	0.4678	5.85	43	1.05	96	1	1	1	1	0	1	0	1	0	0	0	0	0	0	1	0	1	0	0	54	30	31	44	26	0	1	1	0	0	0
11	1	1	61	22.9554	1	128	1	0	1	62	118	64	2.39	171	0.4326	4.39	21	1.9	67.8	1	1	1	0	0	1	0	1	0	0	0	0	0	0	1	1	0	0	0	62	30	31	44	26	1	1	0	0	0	0
10	1	0	61	23.634	0	123	1	0	1	75	160	120	10.3	235	0.083	13.06	40.6	3.64	67	1	1	1	1	0	1	0	0	0	0	0	0	0	0	1	0	1	0	1	38	34	30	50	19	0	1	0	0	0	0
12	1	1	72	22.928	0	129	0	0	0	60	140	90	9.55	187	2.49	8.4	20	2.36	157.8	0	0	0	0	0	1	0	0	0	0	0	0	0	0	1	1	0	1	0	57	28	32	42	27	0	0	0	0	0	0
11	1	1	74	26.3465	1	117	1	1	0	75	180	105	14.44	170	0.099	6.93	39.2	2.84	138	1	1	1	1	0	1	0	1	0	0	0	0	0	0	1	1	1	0	1	60	36	38	50	20	0	1	0	0	0	0
7	1	1	74	23.243	0	127	1	0	1	64	145	80	10.08	155	0.2668	8.4	18	2.01	92	1	1	1	1	0	1	0	0	0	0	0	0	1	0	1	1	1	0	0	47	32	29	52	26	0	1	0	0	0	0
13	1	1	79	25.5102	1	124	0	0	1	80	108	70	8.1	149	0.042	6.86	28.7	3.44	85.9	0	1	1	1	0	1	0	0	0	0	1	0	0	0	2	1	0	0	1	20	37	30	71	18	0	1	0	0	0	0
10	1	1	66	22.0985	1	110	1	0	0	100	105	60	10.47	186	3.667	5.22	38	2.09	100	1	1	1	1	0	1	0	0	0	0	0	0	0	0	1	0	1	0	0	58	23	30	39	24	0	1	1	0	0	0
12	1	0	77	22.6667	0	117	0	0	0	78	140	70	7.24	345	0.04	5.24	10	5.22	94.6	1	1	0	0	0	1	0	1	0	0	0	0	0	0	1	0	1	0	1	59	28	30	44	16	0	0	0	0	0	0
18	1	1	83	19.8347	1	112	0	0	0	80	137	78	7.79	135	3.03	4.66	24.3	1.99	83.3	1	1	1	1	0	2	0	0	0	0	0	0	0	0	1	0	1	0	1	56	35	35	49	19	0	1	0	0	0	0
8	1	1	58	23.8921	1	120	0	0	1	85	135	66	12.55	169	3.307	20.73	30	2.11	111.3	0	1	1	1	0	1	0	1	0	0	0	0	0	0	1	0	1	0	0	50	32	31	47	31	0	1	1	0	0	0
6	1	0	80	19.4	0	105	0	0	1	78	108	72	7.82	239	9.94	14.16	33	2	61	1	1	1	0	1	1	1	0	0	0	0	0	0	0	1	0	2	1	0	46	26	29	48	26	0	1	0	0	0	0
8	0	0	53	27.34	0	134	1	0	0	72	126	56	5.78	191	1.472	5.29	21	1.77	52	0	1	1	0	1	1	0	0	0	0	0	0	0	0	0	0	1	0	0	69	31	29	47	29	0	1	0	0	0	0
11	1	1	68	23.4236	1	125	1	0	1	76	160	106	13.2	220	0.073	7.02	87.2	3.06	88.8	1	1	1	1	0	1	0	1	0	0	0	0	0	0	1	1	1	0	1	58	44	32	55	19	0	1	0	0	0	0
7	1	1	51	28.04	1	138	1	0	1	90	152	82	9.85	207	16	7.6	54	2.3	62	1	1	1	1	0	2	0	1	0	0	0	0	0	0	0	0	0	0	0	51	33	28	42	31	1	1	0	0	0	0
5	1	1	82	23.4236	0	91	1	0	1	78	137	85	7.41	234	0.056	15.46	49.3	2.3	107.4	0	1	1	1	0	1	0	0	0	0	0	0	0	0	2	1	1	0	1	40	59	65	55	22	0	1	0	0	0	0
14	1	1	58	25.528	1	156	1	0	1	61	110	70	5.39	207	0.214	4.83	7.8	1.65	104	1	1	1	1	0	1	0	0	0	0	0	0	0	0	1	0	1	0	1	39	35	35	60	19	0	1	1	0	0	0
8	1	0	64	20.92	0	103	1	0	1	63	130	70	7.09	238	5.629	4.79	26	2.52	87	1	1	1	0	1	1	0	1	0	0	0	0	0	0	1	1	1	0	1	56	30	30	46	28	0	1	0	0	0	0
11	0	0	71	22.8928	0	102	1	0	1	80	130	80	9.43	148	1.95	10.78	11.6	2.59	103.4	0	1	1	1	0	2	1	1	0	0	0	0	0	0	0	0	1	0	0	70	31	32	49	18	0	1	0	0	0	0
6	1	1	63	23.4236	1	139	1	0	0	60	140	85	12.76	189	0.146	5.9	69.4	2.75	70.5	0	1	1	1	0	2	0	0	0	0	0	0	0	0	1	1	1	0	1	55	35	35	49	19	0	1	0	0	0	0
10	1	1	51	26.22	1	151	1	1	1	69	140	91	11.7	182	16	5.69	69	2.86	206	1	1	1	0	1	1	0	1	0	0	0	0	0	0	1	1	0	0	1	59	43	31	45	28	0	1	0	0	0	0
12	1	1	78	23.15	1	109	1	0	1	75	132	66	7.83	196	4.8	6.19	15	1.16	126	1	1	1	1	0	1	0	1	0	0	1	0	0	0	1	0	1	0	1	63	33	32	41	33	0	1	0	0	0	0
4	0	1	74	21.67	1	121	1	0	1	66	120	70	12.04	179	16	5.13	25	1.66	116	0	1	1	1	0	2	0	1	0	0	0	0	0	0	0	0	0	0	0	39	33	29	48	11	0	0	0	1	0	0
12	1	1	63	23.3844	0	143	0	0	1	56	90	60	9.5	149	0.358	6.39	36.8	2.99	115	1	1	1	1	0	1	0	0	0	0	0	0	0	0	1	0	0	0	1	47	41	34	50	18	0	1	0	0	1	1
11	1	1	58	19.8413	1	147	1	1	0	70	140	90	8.39	224	0.041	4.23	29.5	1.34	84	1	1	1	1	0	1	0	0	0	0	0	0	0	0	0	1	1	0	1	62	30	30	49	18	0	1	0	0	1	0
3	1	1	62	23.4236	0	134	1	0	0	70	140	86	9.89	228	6.74	4.74	41.6	2.77	60	1	1	1	1	0	1	0	1	0	0	0	0	0	0	1	0	1	0	1	51	35	35	49	19	0	1	0	0	0	0
9	1	0	75	19.88	0	96	0	0	1	75	90	59	6.68	230	9.01	5.38	59	1.65	66	1	1	1	0	1	1	1	0	0	0	0	0	0	0	2	1	2	0	0	51	35	28	48	31	1	1	0	0	0	0
8	0	0	50	23.7335	0	110	1	0	1	68	123	80	8.08	178	0.4422	5.84	23	1.78	43.2	1	1	1	0	0	1	0	0	0	0	0	0	0	0	1	0	0	0	0	51	40	30	56	30	1	1	0	0	0	0
10	1	1	46	30.1038	1	172	1	0	1	82	170	120	7.79	221	0.036	6.41	139.4	3.93	93	1	1	1	1	0	1	0	1	0	0	0	0	0	0	1	0	1	0	1	42	39	33	52	20	0	1	0	0	0	0
9	1	0	65	22.8135	0	104	1	0	1	96	124	78	9.01	142	2.197	4.78	35	2.13	69	1	1	1	0	0	1	0	0	0	0	0	0	0	0	1	0	1	0	0	55	29	30	40	27	0	1	1	0	0	0
11	1	0	62	20.31	0	149	1	0	1	83	147	98	11.16	310	0.247	5.84	14	5.16	60	0	1	1	1	0	1	0	0	0	0	0	0	0	0	0	0	0	0	1	65	25	25	45	24	1	1	0	0	0	0
6	1	1	61	24.2741	1	142	1	0	1	87	160	100	9.82	185	0.04041	6.47	18	3.1	90	1	1	1	0	0	1	0	0	0	0	0	0	0	0	0	0	0	0	1	60	33	32	42	32	1	1	0	0	0	0
8	1	1	37	22.39	1	142	1	0	0	43	99	69	6.23	196	0.168	4.77	26	2.09	102	1	1	1	1	0	1	0	0	0	0	0	0	0	0	1	0	2	0	0	45	37	37	59	31	0	1	1	0	0	1
7	1	1	48	22.4569	0	124	0	0	0	63	100	70	8.31	195	0.003	5.56	13	0.89	62.5	1	1	1	1	0	1	0	0	0	0	0	0	0	0	1	0	1	0	1	60	29	34	47	34	0	1	0	0	0	0
9	0	1	53	22.8624	1	152	0	0	1	85	108	71	7.2	181	0.182	6.86	13.1	2.84	71.3	1	1	1	1	0	1	0	0	0	0	0	0	0	0	0	0	1	0	1	64	35	35	49	19	0	1	1	0	0	0
12	1	0	70	19.72	1	97	1	0	1	85	113	71	8.1	237	2.784	11.46	24	2.25	68	0	1	1	1	0	4	1	1	0	1	0	0	0	0	1	0	1	0	0	39	36	29	49	27	1	1	0	0	0	0
9	0	1	62	23.83	1	118	1	0	0	55	140	80	7.82	166	6.202	12.46	24	0.98	91	1	1	1	1	1	1	1	1	0	0	0	0	0	0	1	0	0	0	0	54	33	30	49	29	0	1	0	0	0	1
12	1	1	53	26.3465	1	142	1	0	1	81	140	80	6.88	150	1.37	4.55	32.2	2.36	64.1	1	1	1	1	0	2	0	0	0	0	0	0	0	0	1	0	0	0	1	66	36	34	49	16	0	0	1	0	0	0
5	1	0	51	21.6441	1	141	1	1	1	89	134	87	6.46	125	1.57	6.31	24.3	1.27	65	1	1	1	1	0	1	0	1	0	0	0	0	0	0	1	0	1	0	1	51	35	35	49	19	0	1	0	0	0	0
19	0	1	50	17.7832	1	136	0	0	0	80	150	85	13.27	236	0.538	4.63	27.4	1.33	58	1	1	1	0	0	1	0	0	0	0	0	0	0	0	1	0	0	0	1	51	35	35	49	19	0	0	0	0	0	0
17	1	1	64	25.06	0	117	1	0	1	78	105	71	12.35	183	9	9.3	52	1.89	79	1	1	1	0	1	2	1	0	0	0	0	0	0	0	0	0	0	0	0	40	29	31	53	30	0	1	0	0	0	0
11	1	1	55	23.4236	1	150	1	0	1	75	115	75	15.06	205	0.063	5.53	43.2	3.05	78.5	1	1	1	1	0	1	0	1	0	0	0	0	0	0	0	0	0	0	1	60	29	29	41	16	0	0	1	0	1	0
13	0	0	82	20.8117	1	122	1	1	1	77	220	100	5.14	165	0.017	4.08	23.2	4.37	88.7	1	1	1	1	0	2	0	1	0	0	0	0	1	0	1	0	1	0	1	72	28	31	43	17	0	1	0	0	0	0
13	1	1	48	18.29	0	139	1	0	0	59	128	89	10.35	227	16	6.7	106	2.48	74	1	1	1	0	1	1	0	1	0	0	0	0	0	0	0	0	1	0	0	38	32	25	54	27	0	1	0	0	0	1
8	0	1	76	19.27	0	144	1	0	1	68	96	68	6.85	200	0.039	5.03	57	2.19	157	1	1	1	1	0	1	0	0	0	0	0	0	0	0	0	0	0	0	1	59	35	31	45	32	0	1	0	0	0	0
10	0	1	42	30.4218	1	154	1	0	1	90	140	100	14.61	215	0.089	5.99	83.8	3.95	103	1	1	1	1	0	1	0	0	0	0	0	0	0	0	1	0	0	0	1	45	35	35	48	19	0	0	1	0	0	0
11	0	1	71	28.3937	0	135	1	0	1	78	150	90	6.03	105	0.179	5.29	44.2	2.39	71	1	1	1	1	0	1	0	1	0	0	0	0	0	0	1	1	1	0	1	57	28	35	49	19	0	1	0	0	0	0
10	0	1	59	24.45	1	149	1	0	1	73	136	76	5.99	171	0.225	4.86	26	2.57	106	1	1	1	1	0	1	0	1	0	0	0	0	0	0	0	0	0	0	1	67	28	28	47	27	1	1	0	0	0	0
9	1	1	42	25.1857	0	143	1	0	1	88	117	70	15.07	243	1.613	5.26	35	1.72	66.3	1	1	1	1	0	1	0	0	0	0	0	0	0	0	1	0	1	0	0	55	35	31	50	26	1	1	0	0	0	0
7	1	0	60	23.5157	0	92	0	0	0	70	109	69	11.02	179	10	5.4	109	2.66	135	0	1	1	1	0	4	0	1	0	0	0	0	0	0	2	0	0	0	0	46	34	28	54	26	0	1	0	0	0	0
9	1	1	80	21.26	0	141	1	0	1	106	123	79	9.58	77	16	10.19	49	2.52	219	1	1	1	1	0	2	0	0	0	0	0	0	0	0	1	1	1	0	0	39	25	30	43	28	0	0	1	0	0	0
10	1	1	56	19.5717	0	141	1	1	1	90	151	70	8.74	349	0.242	4.05	18.2	2.56	71	1	1	1	1	0	1	0	1	0	0	0	0	0	0	1	0	1	0	1	71	33	33	45	18	0	1	0	0	0	0
28	1	1	55	19.03	0	133	0	0	0	78	92	71	6.58	174	1.994	4.37	69	1.88	61	0	1	1	1	0	2	0	0	0	0	0	0	0	1	1	0	1	1	0	51	32	28	47	32	1	0	0	1	0	0
9	1	1	62	23.44	0	140	1	0	1	70	129	72	10.77	166	6.766	5.21	45	1.59	102	1	1	1	0	1	4	1	1	0	0	0	0	0	0	2	1	0	0	0	63	36	34	47	33	0	0	1	0	1	0
11	1	1	45	21.9713	1	153	1	0	0	68	145	90	12.48	120	0.017	5.27	44.9	2.77	79	1	1	1	1	0	1	0	0	0	0	0	0	0	0	1	0	0	0	1	66	29	32	50	19	0	1	0	0	0	0
11	1	0	54	23.6563	0	134	1	0	1	92	145	85	15.65	245	1.202	5.36	14	4.43	96.4	1	1	1	1	0	1	0	0	0	0	0	0	0	0	0	0	0	0	0	57	24	31	42	22	1	1	0	0	0	0
9	1	1	46	27.05	1	157	1	0	1	81	126	80	13.64	245	16	5.38	77	4.24	88	1	1	1	1	0	1	0	0	0	0	0	0	0	1	0	0	0	0	0	61	33	29	44	31	0	1	0	0	0	0
11	1	1	72	22.1453	1	147	1	0	1	78	115	75	8.59	227	3.85	5.04	71	3.55	69	1	1	1	1	0	1	0	1	0	0	0	0	0	0	1	1	1	0	1	42	27	36	48	18	0	1	0	0	0	0
8	1	1	63	23.6326	0	124	1	0	1	70	120	80	10.7	128	0.2443	9.2	15	2.72	60.8	1	1	1	1	0	1	0	1	0	0	0	0	0	0	0	0	0	0	0	55	32	28	46	25	1	1	1	1	0	0
15	1	1	78	20.0288	1	151	0	0	0	85	90	60	7.35	136	0.844	4.12	29.9	1.31	76	1	1	1	1	0	4	0	0	0	0	0	0	0	0	1	1	1	0	1	45	28	32	42	16	0	1	0	0	0	0
8	0	0	45	28.94	0	148	1	0	1	65	129	75	9.57	213	2.187	8.72	33	3.98	49	1	1	1	1	0	1	1	1	0	0	0	0	0	0	1	0	0	0	0	63	28	26	42	26	0	1	0	0	0	0
7	0	1	55	24.22	1	158	1	0	1	73	120	70	12.49	195	16	7.09	37	2.36	64	1	1	1	1	0	1	0	1	0	0	0	0	0	0	2	0	1	0	0	50	40	33	51	31	0	1	0	0	0	0
6	1	1	60	24.93	0	152	1	0	0	52	128	80	4.89	186	0.001	4.71	34	2.26	88	1	1	1	1	0	1	0	1	0	0	0	0	0	0	1	0	1	0	0	65	33	34	45	34	0	1	0	0	0	1
13	1	1	64	15.79	1	105	1	0	0	84	137	79	8.95	288	0.169	4.67	16	1.92	172	1	1	1	1	0	1	0	0	0	0	0	0	0	0	1	0	0	0	0	46	32	29	42	27	0	1	0	0	0	0
11	1	1	52	24.4039	1	154	1	0	1	100	160	100	9.38	158	0.0438	7.33	17	1.86	92	1	1	1	1	0	1	0	1	0	0	0	0	0	0	0	1	0	0	0	40	26	34	48	24	0	1	0	0	0	0
8	1	1	49	26.15	1	128	0	1	1	76	150	96	8.23	163	0.017	10.85	31	1.87	79	1	1	1	0	1	1	1	1	1	0	0	0	0	0	1	0	0	0	0	68	37	30	48	27	0	1	1	0	0	0
9	0	0	80	17.805	0	124	0	0	0	120	183	123	5.11	120	0.024	5.2	10.5	1.47	198	0	1	1	0	0	4	1	0	0	0	0	1	0	0	2	1	1	0	1	50	33	29	47	17	0	1	1	0	0	0
8	1	1	44	21.4533	0	150	1	1	0	90	150	110	10.35	227	6.36	8.78	41.6	3.47	70	1	1	1	1	0	1	1	1	0	0	0	0	0	0	1	0	0	0	1	51	35	35	49	19	0	1	1	0	0	0
6	0	1	57	24.093	1	157	1	0	1	86	160	90	6.15	183	0.127	5.56	26.4	3.35	70.5	0	1	1	1	0	1	0	0	0	0	0	0	0	0	0	0	1	0	1	72	37	36	44	20	0	1	0	0	0	0
10	1	0	72	23.4236	0	128	1	0	1	70	135	75	7.21	171	2.77	15.62	41.6	3.26	56	0	1	1	1	0	2	0	1	0	0	0	0	0	0	1	1	1	0	1	56	36	34	44	19	0	1	0	0	0	0
6	1	1	57	20.07	1	120	1	0	1	67	110	68	6.94	247	5.072	4.43	24	1.89	88	0	1	1	0	1	1	0	0	0	0	0	0	0	0	0	0	0	0	0	64	33	34	48	33	0	1	0	0	0	0
12	1	1	62	22.84	0	128	1	0	1	81	130	84	9.56	336	4.536	6.11	71	2.17	74	1	1	1	1	0	1	0	0	0	0	0	0	0	0	1	0	0	0	0	30	40	33	61	32	0	1	0	0	0	0
7	1	1	59	21.01	1	146	1	0	1	68	128	75	13.63	281	14.558	5.68	49	3.16	94	1	1	1	1	0	1	0	1	0	0	0	0	0	0	1	0	1	0	0	48	35	30	49	30	0	1	0	0	0	0
10	1	1	62	20.7031	0	135	0	0	0	95	162	115	12.58	252	8.93	7.78	41.6	2.78	68	1	1	1	1	0	1	0	0	0	0	0	0	0	0	1	0	1	0	1	52	30	32	45	17	0	1	0	0	0	0
11	0	1	66	24.8016	0	155	1	0	1	78	130	72	9.18	155	1.73	4.67	26.5	2.56	86	0	1	1	1	0	1	0	1	0	0	0	0	0	0	1	0	1	0	1	66	30	36	42	17	0	1	1	0	0	0
5	1	1	67	30.8	1	152	1	0	1	90	155	56	9.12	230	16	6.28	54	2.22	86	1	1	1	1	0	1	1	1	0	0	0	0	0	0	1	0	0	0	0	48	36	26	53	28	0	1	0	0	0	0
10	1	1	50	25.4	1	152	1	0	1	86	116	86	18.75	220	7.08	4.84	95	2.15	85	1	1	1	1	0	2	0	0	0	0	0	0	0	0	1	0	0	0	0	46	33	34	49	32	0	1	0	0	0	0
12	1	0	76	13.5556	0	115	0	0	0	58	70	45	9.42	216	3.94	4.23	30.7	2.47	55	0	1	1	1	0	4	0	0	0	1	0	0	1	0	1	1	1	0	1	43	26	29	50	15	0	0	1	0	0	1
6	0	0	83	22.48	0	88	0	0	0	71	128	76	3.45	157	0.343	4.04	10	1.99	80	0	1	1	1	0	1	0	0	0	0	0	0	0	0	1	1	1	0	0	57	29	26	42	24	1	1	0	0	0	0
3	1	1	46	20.9	1	118	1	0	1	72	128	76	9.26	208	16	6.7	63	2.52	61	1	1	1	1	0	1	0	0	0	0	0	0	0	0	0	0	0	0	0	61	39	32	52	30	0	1	0	0	0	0
6	0	1	65	25.16	1	144	1	0	0	53	128	76	11.43	158	12.019	4.75	23	2.65	87	1	1	1	1	0	1	0	0	0	0	0	0	0	0	0	0	1	0	0	53	27	27	42	29	0	1	0	0	0	1
14	1	1	51	24.362	0	111	1	0	1	88	100	70	9.32	362	0.4482	4.37	42	2.65	100.6	0	1	1	1	0	3	0	1	0	0	0	0	0	0	0	1	1	0	1	38	39	37	61	34	0	1	1	0	0	0
9	1	0	65	22.8882	0	113	1	0	0	64	150	110	6.01	177	1.127	5.44	21	2.12	79	1	1	1	1	0	1	0	1	0	0	0	0	0	0	2	0	2	1	0	52	33	30	48	25	0	1	0	0	0	0
11	0	1	45	24.4646	0	124	1	0	1	68	140	90	9.78	190	3.44	5.03	56	2.63	86	1	1	1	1	0	2	0	1	0	0	0	0	0	0	1	0	1	0	1	60	31	36	47	20	0	0	1	0	0	0
10	1	1	52	22.4913	1	137	1	0	0	68	134	92	12.64	256	9.29	5.33	41.6	4.3	76	1	1	1	1	0	1	0	1	0	0	0	0	0	0	1	0	1	0	1	51	36	38	48	16	0	1	0	0	0	0
8	0	1	78	22.65	1	121	1	1	0	60	165	90	7.21	228	5.377	4.86	15	2.19	77	0	1	1	1	0	1	0	1	0	0	0	0	0	0	0	0	0	0	0	57	31	29	45	31	0	1	0	0	0	0
16	1	0	67	20.9572	0	116	1	1	0	68	158	75	8	124	0.914	5.24	17.3	3.53	63	0	1	1	1	0	1	0	1	0	0	0	0	0	0	1	0	1	0	1	49	34	30	45	16	0	1	0	0	0	0
12	1	1	53	23.6244	1	122	1	0	1	110	110	70	10.94	243	9.4	4.89	33.4	3.75	71	0	1	1	1	0	2	0	0	0	0	0	0	0	0	1	0	0	0	1	45	31	31	48	18	0	1	0	0	0	0
9	1	1	48	24.2215	0	160	1	0	1	88	170	120	14.52	281	0.092	6.44	149.9	4.37	68	1	1	1	1	0	2	0	0	0	0	0	0	0	0	1	0	1	0	1	51	36	31	50	20	0	1	0	0	0	0
10	0	0	71	18.902	0	112	1	0	1	70	110	60	4.98	164	0.108	4.88	5.6	2.37	61	0	1	1	1	0	2	0	1	0	0	0	0	0	0	1	1	1	0	1	39	47	36	71	17	1	0	1	1	0	0
7	1	1	62	23.6111	0	137	1	0	1	86	130	80	13.44	107	0.5762	7.04	31	1.72	92.9	1	1	1	1	0	2	0	0	0	0	0	0	0	0	1	0	0	0	0	55	33	29	45	25	1	1	0	0	0	0
7	1	1	78	20.9572	1	113	1	0	1	100	136	90	6.91	168	0.139	5.14	20.7	3.03	81.7	0	1	1	1	0	2	0	0	0	0	0	0	1	0	2	1	1	0	1	34	44	39	70	19	0	1	0	0	0	0
3	0	1	40	26.0617	1	157	1	0	1	70	130	70	6.53	169	0.395	3.72	55.1	1.53	80.9	0	1	1	1	0	1	0	0	1	0	0	0	0	0	1	0	1	0	1	51	35	35	49	19	0	1	0	0	0	0
12	1	1	61	24.623	1	134	1	0	1	117	138	83	14.42	182	0.145	7.76	26.6	2.59	64	1	1	1	1	0	1	1	0	0	0	0	0	0	0	0	0	0	0	1	67	35	35	44	19	0	1	0	0	0	0
10	1	0	74	23.6244	0	108	1	0	1	93	156	115	9.26	172	0.056	5.37	42.8	2.52	78.9	0	1	1	1	0	1	0	1	0	0	0	0	0	0	1	0	1	0	1	51	35	35	49	19	0	1	0	0	0	0
10	0	1	54	19.45	0	143	1	0	1	82	95	61	8.36	234	1.397	6.54	20	4.4	59	1	1	1	1	1	1	0	0	0	0	0	0	0	0	0	0	0	0	0	56	30	30	44	30	1	1	0	0	0	0
14	1	1	76	19.487	1	107	1	0	1	65	124	73	7.22	118	0.055	4.73	42.6	2.25	130.2	1	1	1	1	0	2	0	0	0	0	0	0	1	0	2	1	1	0	0	19	40	38	62	19	0	1	0	0	0	0
11	1	1	48	23.4236	1	139	1	0	0	58	130	95	9.68	120	1.78	5.49	36.3	3.91	120	1	1	1	1	0	2	0	0	0	0	0	0	0	0	1	0	1	0	1	42	37	34	57	18	0	1	0	0	0	1
4	1	1	63	21.7193	1	135	1	0	1	87	121	78	9.84	196	2.24	6.92	41.6	3.44	59	0	1	1	1	0	2	0	0	0	0	0	0	0	0	1	1	1	0	1	24	31	34	55	16	1	1	0	0	0	0
12	0	0	68	25.9645	0	130	1	1	1	85	150	90	10.54	207	0.198	12.93	41.6	2.77	59.4	1	1	1	1	0	1	0	0	0	0	0	0	0	0	1	1	0	0	1	65	37	33	41	17	0	1	0	0	0	0
8	1	0	65	23.4236	0	123	1	0	1	85	130	80	12.25	159	1.1	6.66	61.1	3.18	77.7	0	1	1	1	0	1	0	1	0	0	0	0	0	0	1	1	1	0	1	75	37	35	42	18	0	1	0	0	0	0
11	0	1	52	24.2188	0	148	1	0	1	77	190	100	7.36	123	0.067	5.82	24.3	3.31	82	0	1	1	1	0	1	0	1	0	0	0	0	0	0	0	1	0	0	1	61	25	30	39	16	0	1	0	0	0	0
5	1	0	50	21.6413	0	122	1	0	1	75	120	70	13.07	205	0.947	3.93	24.1	7.55	65	0	1	1	1	0	1	0	1	0	0	0	0	0	0	0	0	1	0	1	66	24	26	42	19	0	0	0	0	0	0
14	1	1	65	15.625	0	114	1	0	1	80	175	115	4.49	171	0.007	4.12	41.6	4.78	75.3	0	1	1	1	0	1	0	1	0	0	0	0	0	0	1	1	1	0	1	30	36	36	56	20	0	1	0	0	0	0
9	0	1	68	23.4236	1	69	1	0	0	106	140	80	12.66	169	0.286	6.23	14.5	1.56	102	0	1	1	1	0	2	1	1	0	0	0	0	0	0	1	0	1	0	1	67	38	36	51	20	0	0	1	1	0	0
9	1	1	49	25.3515	1	155	1	0	1	75	130	100	7.47	202	0.017	5.66	22.9	4	95	1	1	1	1	0	1	0	0	0	0	0	0	0	0	0	0	0	0	1	58	35	35	51	19	0	1	0	0	0	0
12	0	0	70	24.0346	1	98	1	0	1	95	130	80	5.73	173	6.5	9.36	13.4	3.45	120	0	1	1	1	0	3	1	0	0	0	0	0	0	0	0	1	1	0	1	34	35	35	54	19	0	0	1	1	0	0
6	1	0	67	28.76	1	132	1	0	0	56	130	80	5.08	253	0.001	5.69	22	2.93	59	0	1	1	1	1	1	0	1	0	0	0	0	0	0	1	0	0	0	0	60	39	30	48	28	0	1	0	0	0	1
6	1	1	66	27.43	1	130	1	1	1	70	142	84	14.05	249	1.101	6.15	23	2.86	82	1	1	1	1	0	1	1	1	0	0	0	0	0	0	1	1	1	1	0	51	33	29	48	33	0	1	0	0	0	0
9	0	1	63	26.1752	1	143	1	1	1	90	136	70	8.57	162	0.327	8.51	33	1.66	92	1	1	1	1	0	1	0	1	0	0	0	0	0	0	1	1	0	0	1	69	30	30	46	18	1	1	0	0	0	0
12	1	1	66	28.23	0	163	1	0	1	67	149	87	7.84	198	0.101	10.65	45	1.1	86	1	1	1	0	1	1	1	1	0	0	0	0	0	0	0	0	0	0	0	51	33	32	45	27	0	1	0	0	0	0
10	1	1	64	25.0995	1	139	1	1	1	74	130	80	7.72	130	0.658	5.47	44.7	2.24	81	1	1	1	1	0	2	0	1	0	0	0	0	0	0	0	1	1	0	1	51	35	35	45	19	0	1	0	0	0	0
11	0	0	52	26.64	0	116	1	1	1	93	188	89	15.03	483	0.078	18.31	16	2.5	112	0	1	1	1	0	1	1	1	0	0	0	0	0	0	1	0	0	0	0	59	34	26	49	27	0	1	0	0	0	0
10	1	1	35	26.5731	0	152	1	0	1	92	120	80	9.78	192	1.3	10.34	32.2	3.76	60.5	1	1	1	1	0	1	1	0	0	0	0	0	0	0	0	0	0	0	1	49	30	30	44	16	0	1	0	0	0	0
6	0	1	85	22.39	1	134	1	0	1	54	120	70	5.61	196	1.674	3.88	23	2.35	82	0	1	1	1	0	1	0	0	0	0	0	0	0	0	1	1	1	0	0	62	35	35	47	26	0	1	0	0	0	1
13	1	1	61	23.4236	1	120	1	0	1	79	110	70	6.36	100	0.534	12.96	72	2.65	54	1	1	1	1	0	2	1	0	0	0	0	0	0	0	2	1	1	0	1	34	38	32	57	21	0	1	1	0	0	0
13	0	1	77	29.3848	1	158	0	1	0	85	123	77	8.31	213	0.011	6.75	13.2	3.88	73	1	1	0	1	0	2	0	1	0	0	0	0	1	0	1	0	1	0	1	51	41	45	49	19	0	1	1	0	0	0
19	1	0	69	25.68	0	98	1	0	1	101	141	99	13.33	326	1.704	5.64	4	1.44	180	0	1	1	1	0	3	0	1	0	0	0	0	0	0	2	1	2	0	0	40	35	31	43	27	0	0	1	1	0	0
8	1	0	71	17.898	1	119	0	0	0	50	120	70	10.74	211	4.47	5.54	19.9	2.6	64	1	1	1	1	0	1	0	0	0	0	0	0	0	0	1	0	1	0	1	53	25	24	42	13	0	0	1	0	0	1
12	0	1	78	21.76	1	69	1	0	1	75	111	56	5.19	212	0.001	5.43	10	1.28	103	1	1	1	1	0	2	0	0	0	0	0	0	1	0	1	0	1	0	0	32	30	35	53	32	1	1	0	0	0	0
13	0	0	65	23.6128	0	114	0	0	1	75	130	75	9.46	242	0.057	5.17	45.9	4.19	55	1	1	1	1	0	1	0	0	0	0	0	0	0	0	1	0	0	0	1	43	27	27	41	16	0	1	0	0	0	0
11	1	1	72	17.7154	1	119	1	0	1	70	97	56	9.36	132	5.35	5.04	65.7	1.19	113	0	1	1	1	0	4	0	0	0	0	0	0	0	0	1	0	2	0	1	51	29	55	44	25	0	1	0	0	0	0
10	0	1	58	24.8163	1	146	1	1	1	72	124	70	5.77	132	0.015	5.05	15.4	3.09	84	0	1	1	1	0	1	0	1	0	0	0	0	0	0	1	0	1	0	1	72	36	36	50	20	0	1	0	0	0	0
31	0	1	57	24.093	0	139	1	0	1	74	130	80	5.69	201	0.546	5.92	24.8	1.38	72	1	1	1	1	0	2	0	1	0	0	0	0	0	0	1	1	1	0	1	40	35	35	55	17	0	1	0	0	0	0
10	0	1	75	22.5827	1	135	1	0	1	79	155	78	7.52	142	0.075	7.58	24.9	3.37	80.3	1	1	1	1	0	1	0	0	0	0	0	0	0	0	0	0	0	0	1	48	34	34	47	20	0	0	0	0	0	0
15	1	0	48	23.7332	0	137	1	0	1	80	125	75	10.39	125	0.478	6.06	26.8	2.72	60	1	1	1	1	0	1	0	1	0	0	0	0	0	0	0	0	0	0	1	65	27	35	42	17	0	0	1	0	0	0
3	0	1	47	31.46	1	166	1	0	1	96	140	100	19.85	239	5.293	4.88	27	3.38	85	0	1	1	0	1	1	0	1	0	0	0	0	0	0	0	0	0	0	0	52	35	32	55	30	0	1	1	0	0	0
11	1	1	78	25.0135	0	145	1	0	1	66	170	100	6.63	153	0.047	4.94	37.1	3.4	55	1	1	1	1	0	1	0	1	0	0	0	0	0	0	0	1	1	0	1	48	32	35	49	17	0	1	1	0	0	0
3	0	0	69	23.07	0	97	1	0	0	99	124	63	5.44	88	1.497	8.1	155	1.73	81	0	1	1	1	0	1	1	1	0	0	0	0	0	0	1	0	0	0	0	36	33	26	47	26	0	1	0	0	0	0
8	1	0	64	19.15	0	127	1	0	0	72	114	71	9.55	218	16	5.77	79	1.9	62	1	1	1	1	1	1	0	0	0	0	0	0	0	0	1	1	1	1	0	47	28	24	44	25	0	1	0	0	0	0
14	0	1	68	20.4382	1	141	0	0	0	70	120	85	10.25	226	0.297	4.64	14	2.19	92	0	1	1	1	0	1	0	0	0	0	0	0	0	0	0	0	1	0	1	59	35	38	55	18	0	1	0	0	0	0
15	1	1	45	24.281	1	136	1	0	1	76	140	90	9.15	192	0.168	6.45	11.4	3	67	1	1	1	1	0	2	0	0	0	0	0	0	0	0	1	0	1	0	1	70	33	31	48	20	0	0	1	1	0	0
12	1	1	48	21.7193	1	143	1	0	1	66	110	70	12.68	291	0.264	4.68	41.6	4.05	80	1	1	1	1	0	1	0	0	0	0	0	0	0	0	1	0	1	0	0	60	30	36	41	19	0	1	0	0	0	0
2	0	1	67	24.8	1	127	0	0	0	88	109	69	7.79	163	0.01	7.06	21	3	209	0	1	1	1	0	4	0	0	0	0	0	0	0	0	1	0	0	0	0	54	33	30	49	29	0	0	0	1	0	0
10	1	0	69	23.4236	0	112	1	0	1	72	170	100	11.89	209	5.81	4.65	41.6	4.83	74	1	1	1	1	0	1	0	1	0	0	0	0	0	0	1	1	1	0	1	58	37	35	45	20	0	1	0	0	0	0
7	0	1	49	22.8395	0	154	0	1	1	72	122	85	7.23	134	0.154	5.1	18.2	1.76	71	1	1	1	1	0	1	0	1	0	0	0	0	0	0	0	0	1	0	0	61	31	37	52	21	0	0	1	0	0	0
10	1	1	64	22.68	1	149	0	0	1	75	109	61	11.11	189	0.037	8.47	52	2.25	59	1	1	1	0	1	1	1	0	0	0	0	0	0	0	0	0	0	0	0	65	30	25	44	26	0	1	0	0	0	0
15	1	1	52	27.1809	0	133	1	0	1	108	94	58	14.8	140	1.58	7.6	43	3.64	100.1	1	1	1	1	0	2	0	0	0	0	0	0	0	0	1	0	1	0	1	60	30	35	45	16	0	1	0	0	0	0
7	0	1	68	21.0938	1	132	1	0	1	62	170	90	4.48	106	0.228	4.96	80.5	4.96	78	1	1	1	1	0	1	1	1	0	0	0	0	0	0	1	1	1	0	1	51	35	35	49	19	0	1	0	0	0	0
6	1	1	86	23.4236	0	145	0	0	0	70	190	100	7	107	0.151	7.56	17.1	2.6	89.8	0	1	1	1	0	2	0	1	1	0	0	0	0	0	1	0	1	0	1	51	35	35	49	19	0	0	0	0	1	0
12	1	1	70	25.3906	0	157	0	0	0	86	144	104	25.92	301	10	5.21	143.3	1.81	83.4	1	1	1	1	0	4	0	0	0	0	0	0	0	1	1	1	1	0	1	46	31	36	41	20	0	1	0	1	0	0
18	1	1	58	22.429	1	122	1	0	0	84	144	70	7.47	165	0.4236	8.4	32	1.66	76.2	1	1	1	1	0	1	0	0	0	0	0	0	1	0	0	0	1	0	0	48	29	32	44	27	0	1	1	1	0	0
9	1	1	39	23.4236	1	153	1	0	1	105	130	90	14.04	168	3.9	4.61	52.1	2.63	72	1	1	1	1	0	1	0	0	0	0	0	0	0	0	0	1	1	0	1	42	30	34	55	16	0	1	0	0	0	0
7	1	1	51	24.8451	1	139	0	0	0	82	120	90	8.25	184	0.03424	19.48	57	1.77	91.1	1	1	1	0	0	1	0	0	1	0	0	0	0	0	1	0	0	0	0	50	33	29	54	26	1	1	1	0	0	0
12	1	0	66	22.6667	0	105	1	1	1	74	120	85	7.72	225	0.031	5.74	6.8	2.94	107	1	1	1	1	0	4	0	1	0	0	0	0	0	0	1	0	1	0	1	44	33	30	51	19	0	1	0	0	0	0
12	1	0	66	22.6667	0	105	1	1	1	74	120	85	7.72	225	0.031	5.74	6.8	2.94	107	1	1	1	1	0	4	0	1	0	1	0	0	0	0	1	0	1	0	1	44	33	30	51	19	0	1	0	0	1	0
12	0	0	66	24.97	0	115	1	0	1	65	134	85	7.94	173	9.04	4.38	45	2.17	100	0	1	1	1	0	1	0	1	0	0	0	0	0	0	1	0	0	1	0	61	28	30	41	27	1	1	0	0	0	0
12	0	0	66	24.97	0	115	1	0	1	65	134	85	7.94	173	9.04	4.38	45	2.17	100	0	1	1	1	0	1	0	1	0	1	0	0	0	0	1	0	0	1	0	61	28	30	41	27	1	1	0	0	1	0
9	1	0	80	14.79	0	106	1	0	0	70	111	73	5	124	12.724	8.24	21	1.66	66	1	1	1	1	0	1	1	0	0	0	0	0	0	0	1	0	0	0	0	40	27	22	38	22	0	1	0	0	0	0
8	1	1	60	24.0816	0	152	1	0	1	61	133	80	9.44	227	0.09812	7.07	15	0.99	82.5	1	1	1	0	1	1	0	0	0	0	0	0	0	0	2	1	0	0	0	30	33	30	55	22	1	1	0	0	0	0
8	0	1	39	22.7204	1	156	1	1	1	72	175	120	7.31	165	0.134	6.06	42.8	3.25	85	0	1	1	1	0	1	0	1	0	0	0	0	0	0	0	0	0	0	0	56	39	33	46	19	0	1	0	0	0	0
14	1	1	50	25.9516	0	159	1	0	0	105	135	105	12.87	141	6.63	6.59	41.6	3.86	75	1	1	1	1	0	3	0	0	0	0	0	0	0	0	1	1	0	0	1	42	38	37	55	16	0	1	0	1	0	0
8	0	1	78	27.6398	1	158	1	1	1	72	130	80	8.25	170	0.462	5.96	22.7	3.4	106	1	1	1	1	0	2	0	1	0	0	0	0	0	0	1	1	0	0	1	62	35	35	49	19	0	1	1	0	0	0
13	1	1	61	26.9274	0	155	1	0	1	100	136	75	12.11	151	0.209	5.68	97.1	4.58	75	1	1	1	1	0	1	0	0	0	0	0	0	0	0	1	0	0	0	1	55	40	35	51	20	0	1	0	0	0	0
8	1	1	66	24.8016	0	119	1	0	0	40	115	65	11.54	141	2.82	12.4	36.9	2.88	178.3	1	1	1	1	0	4	1	0	0	1	0	0	0	0	1	1	2	0	1	60	30	20	42	20	0	0	1	0	0	1
14	0	1	65	26.6749	0	132	1	0	1	71	120	60	6.01	127	0.542	8.48	41.6	2.32	89.7	1	1	1	1	0	1	1	1	0	0	1	0	0	0	0	1	1	0	1	68	40	39	54	19	0	1	1	1	0	0
10	1	1	75	22.04	0	125	1	0	1	81	148	106	8.31	148	6.658	4.77	7	2.25	82	1	1	1	1	0	1	0	0	1	0	0	0	0	0	1	1	1	1	0	50	36	30	46	31	0	0	1	0	0	0
19	1	0	68	19.7239	0	104	0	0	1	74	120	70	7.3	199	0.079	2.9	16.7	2.95	123.6	1	1	1	1	0	2	1	1	0	0	0	0	0	0	0	1	1	0	1	49	40	35	40	16	0	0	1	1	0	0
13	0	1	67	24.577	0	150	1	1	1	74	130	70	8.21	128	2.86	9.29	34.7	2.96	105.5	0	1	1	1	0	2	0	1	0	0	0	0	0	0	1	0	1	0	1	51	35	35	49	19	0	1	0	0	0	0
6	0	1	52	28.96	1	141	1	0	0	60	153	89	7.24	162	11.998	4.57	35	1.77	90	1	1	1	1	0	1	0	1	0	0	0	0	0	0	1	0	1	0	0	60	42	34	51	31	0	1	0	0	0	0
9	1	1	65	23.4236	1	121	1	0	1	77	110	80	9.74	93	3.69	6.49	41.6	2.65	70	1	1	1	1	0	1	0	1	0	0	0	0	0	0	1	0	1	0	1	44	34	31	55	20	0	1	0	0	0	0
12	1	1	52	23.4236	1	124	1	0	1	100	127	80	10.63	180	1.94	6.86	41.6	2.77	91	1	1	1	1	0	4	0	0	0	1	0	0	0	1	0	0	0	0	1	44	27	31	26	17	0	1	0	0	0	0
12	1	1	66	24.5089	1	126	1	0	1	73	150	75	7.24	162	1.51	6.8	21.7	2.52	88	1	1	1	1	0	1	0	1	0	0	0	0	0	0	1	1	0	0	1	52	41	38	55	17	0	1	0	0	0	0
9	1	1	44	23.9062	1	154	0	0	1	80	105	80	15.08	171	0.591	4.8	18.7	3.44	63.7	0	1	1	1	0	1	0	0	0	0	0	0	0	0	0	0	0	0	1	59	30	35	45	16	0	1	0	0	0	0
6	1	1	58	23.4236	1	135	1	0	1	64	175	115	10.67	194	0.077	5.07	54.3	3.02	59.4	0	1	1	1	0	2	0	1	0	0	0	0	0	0	1	1	1	0	1	36	36	35	62	19	0	1	0	0	0	0
46	1	0	83	20.69	0	91	0	0	1	73	118	66	11.03	145	16	8.89	29	1.69	83	0	1	1	1	0	2	1	1	0	0	0	0	1	0	3	1	2	0	0	44	37	30	50	22	0	1	0	0	0	0
13	0	0	64	18.026	0	111	1	0	1	70	123	90	10.83	301	10	9.72	68.5	4.18	112	1	1	1	1	0	3	0	1	1	0	0	0	0	0	1	1	1	0	1	22	35	34	73	16	0	1	0	0	0	0
10	1	1	82	23.4236	1	115	1	0	1	60	105	65	8.16	150	1.27	5.64	53	2.96	79.8	1	1	1	1	0	2	0	0	0	0	0	0	0	0	1	0	1	0	1	46	35	33	45	18	0	1	0	0	0	0
11	0	0	75	20	0	91	1	0	1	76	150	80	5.26	192	1.38	4.72	14	2.65	71	1	1	1	1	0	1	0	1	0	0	0	0	0	0	0	1	1	0	1	63	35	35	49	19	0	1	0	0	0	0
5	1	1	66	25.2826	1	159	1	0	1	80	120	70	7.56	184	0.314	5.1	28.4	2.93	68.6	1	1	1	1	0	1	0	1	0	0	0	0	0	0	0	0	1	0	1	64	31	34	46	17	0	1	0	0	0	0
9	1	1	61	24.1115	0	135	1	1	1	58	140	90	7.6	162	0.287	4.1	41.6	2.16	98.4	1	1	1	1	0	1	0	1	0	0	0	0	0	0	1	1	1	0	1	66	42	39	52	20	0	0	1	0	0	1
4	1	1	59	23.4236	1	147	1	0	1	75	130	90	6.4	214	2.54	6.2	41.6	2.71	74	0	1	1	1	0	2	0	0	0	0	0	0	0	0	1	0	1	0	1	41	29	32	44	19	0	1	0	0	0	0
8	1	1	58	21.83	0	161	1	0	1	62	115	72	7.43	237	0.001	4.35	28	1.96	75	1	1	1	1	0	1	0	0	0	0	0	0	0	0	1	0	0	0	0	67	27	30	42	29	0	1	0	0	0	0
9	1	1	49	26.8923	1	154	1	0	1	78	140	70	15.91	236	0.133	4.7	28	2.9	66	1	1	1	1	0	1	0	0	0	0	0	0	0	0	1	0	1	0	1	68	32	36	46	16	0	1	0	0	0	0
11	1	0	71	23.4236	0	126	1	0	1	75	112	80	6.31	159	0.125	5.66	77.3	3.26	59.8	1	1	1	1	0	1	0	0	0	0	0	0	0	0	1	1	1	0	1	39	27	32	40	20	1	1	0	0	0	0
5	1	1	79	23.4236	1	129	1	0	0	94	140	80	7.52	180	2.17	13.2	41.6	2.43	158	0	1	1	1	0	2	1	1	0	0	0	0	0	0	1	1	1	0	1	51	43	34	46	21	0	1	0	1	0	0
7	1	1	54	24.4425	1	127	0	0	1	88	130	98	10.6	189	0.1258	8.4	28	2.7	114.5	1	1	1	0	0	1	0	0	0	0	0	0	0	0	0	0	0	0	0	55	30	31	44	28	0	1	0	0	0	0
9	0	0	48	26.0375	0	133	1	1	1	72	126	72	9.26	197	0.735	5.94	13.1	2.79	61.2	0	1	1	1	0	1	0	1	0	0	0	0	0	0	1	1	1	0	1	60	33	33	46	18	0	1	0	0	0	0
10	1	1	60	23.4236	1	148	1	0	1	85	130	100	12.65	200	10	6.25	123.2	2.53	83.8	1	1	1	1	0	1	0	0	0	0	0	0	0	0	1	1	1	0	1	48	35	35	56	20	0	1	0	0	0	0
7	1	1	65	22.5354	1	121	1	0	1	64	91	60	6.22	259	1.078	11.68	42	1.47	84.4	1	1	1	0	0	2	1	0	0	0	0	0	0	0	1	0	1	0	0	38	29	35	50	24	1	1	1	0	0	0
13	1	1	57	24.0285	1	133	0	0	1	101	121	65	17.63	273	2.903	4.5	62	2.07	124.4	1	1	1	1	0	2	0	1	0	0	0	0	0	0	0	1	0	0	0	32	30	34	56	25	0	1	0	0	0	0
10	1	1	47	23.4236	0	130	0	0	0	65	130	80	13.46	262	7.11	4.94	56.2	0.32	62	1	1	1	1	0	4	0	0	0	1	0	0	0	1	0	0	0	0	1	38	38	39	55	20	0	0	1	0	0	0
11	1	1	73	23.4236	1	127	1	0	1	69	128	79	6.79	187	1.1	4.71	5.9	2.66	92	1	1	1	1	0	1	0	1	0	0	0	0	0	0	1	0	0	0	1	53	38	36	53	20	0	1	0	1	0	0
12	1	1	60	24.8	1	153	1	0	1	76	120	80	7.15	205	0.091	4.02	30	2.59	91	1	1	1	1	0	1	0	0	0	0	0	0	0	0	0	0	1	0	0	43	29	25	50	27	0	0	1	0	0	0
6	1	1	43	28.3737	1	145	1	0	1	95	120	90	18.76	225	10	5.85	64.5	4.31	56.2	1	1	1	1	0	1	0	0	0	0	0	0	0	0	1	0	0	0	1	48	35	35	48	19	0	1	0	0	0	0
5	1	1	62	25.65	1	135	1	0	1	58	120	70	5.2	224	10.318	5.87	21	1.61	83	1	1	1	1	0	1	1	0	0	0	0	0	0	0	2	1	1	1	0	64	34	33	52	34	0	1	0	0	0	1
8	1	0	58	28.54	0	141	0	0	1	70	102	68	7.42	320	0.862	4.89	56	2.56	71	1	1	1	1	0	2	0	1	0	0	0	0	0	0	0	2	0	0	0	37	29	25	50	24	0	1	0	0	0	0
12	1	1	53	23.1481	0	144	1	0	1	80	120	75	13.8	181	6.35	7.78	36.2	4.72	70.6	1	1	1	1	0	2	0	0	0	0	0	0	0	0	0	0	0	0	1	39	31	35	48	19	0	1	0	0	0	0
9	1	1	58	21.72	1	118	0	0	1	77	102	60	14.61	212	4.929	4.43	13	2.52	62	0	1	1	1	1	2	0	0	0	0	0	0	0	0	0	0	0	0	0	71	32	29	41	30	0	1	0	0	0	0
10	1	0	64	20.1197	0	132	1	0	1	87	158	98	14.05	172	1.92	5.19	20.9	4.03	69.3	1	1	1	1	0	1	0	1	0	0	0	0	0	0	1	1	1	0	1	45	35	34	42	18	0	1	0	0	0	0
11	1	1	38	23.4236	1	161	1	0	1	96	118	85	11.36	154	2.58	4.06	90.3	2.2	66	1	1	1	1	0	1	0	0	0	0	0	0	0	0	1	1	1	0	1	51	36	32	58	51	0	1	0	0	0	0
12	1	0	68	20.8117	0	104	1	0	1	75	135	80	8.62	186	0.095	4.34	11.4	3.6	72.7	1	1	1	1	0	2	0	1	0	0	0	0	0	0	2	1	0	0	1	36	55	45	60	20	0	1	0	0	0	0
9	1	1	77	23.4236	1	103	1	0	1	95	100	70	6.85	233	2.27	6.86	16.2	3.5	123.6	0	1	1	1	0	3	0	1	1	0	0	0	0	0	1	1	2	0	1	28	40	35	60	20	0	1	0	0	0	0
9	0	1	71	23.94	0	128	0	0	1	129	170	89	7.12	123	0.65	9.77	39	2.3	75	0	1	1	1	0	3	1	1	0	0	0	0	0	0	1	0	0	0	0	54	33	30	49	29	0	1	0	1	0	0
6	0	0	65	21.93	0	112	1	0	1	72	118	72	7.26	308	4.347	4.07	153	1.7	88	1	1	1	1	0	1	0	0	0	0	0	0	0	0	1	1	1	0	0	48	29	24	49	24	0	1	0	0	0	0
12	1	1	65	23.9643	1	106	1	1	1	75	120	75	5.55	285	2.49	8.4	35	2.48	92	1	1	1	1	0	2	0	0	0	0	0	0	0	0	1	0	1	1	0	76	28	32	51	24	0	0	0	0	0	0
10	1	1	52	30.4867	1	79	1	0	1	100	125	80	11.35	168	3.37	6.86	41.6	3.25	82	0	1	1	1	0	2	0	1	0	0	0	0	0	0	1	1	1	0	1	33	45	34	72	20	0	1	0	0	0	0
11	1	1	56	22.6003	1	161	1	0	1	80	125	75	9.4	182	5.61	5.11	52	3.82	76.6	1	1	1	1	0	1	0	0	0	0	0	0	0	0	0	0	1	0	1	54	30	34	45	18	0	1	0	0	0	0
10	1	1	77	18.424	1	114	1	0	1	82	140	80	7.68	150	1.05	6.57	8.47	2.77	43.3	1	1	1	1	0	2	0	1	0	0	0	0	0	0	1	1	1	0	1	60	27	35	49	20	0	1	0	0	0	0
27	1	0	67	27.53	0	129	1	0	1	68	111	75	16.23	238	16	11.46	100	2.77	53	1	1	1	1	0	2	0	1	0	0	0	0	0	0	1	1	0	0	0	43	29	25	48	23	1	1	0	0	0	0
21	1	1	41	27.7778	1	146	1	0	1	106	96	58	20.57	183	4.54	5.92	106.8	1.89	87	0	1	1	1	0	2	0	1	0	0	0	0	0	0	1	0	0	0	1	38	40	37	60	19	0	1	1	0	0	0
14	1	1	57	23.4236	1	141	1	0	1	95	145	90	16.83	207	7.55	6.86	48.2	2.77	71	1	1	1	1	0	1	1	0	0	0	1	0	0	0	1	1	1	0	0	34	35	33	56	17	0	1	0	0	0	0
10	1	1	59	17.4	1	120	1	0	1	74	132	69	11.24	315	16	4.63	79	2.46	78	1	1	1	1	0	1	0	1	0	0	0	0	0	0	1	0	0	0	0	72	29	26	50	28	0	1	0	0	0	0
16	0	0	60	20.0877	0	142	1	0	1	70	140	90	8.02	163	0.387	4.25	41.6	2.07	60	1	1	1	1	0	1	0	0	1	0	0	0	0	0	1	0	1	0	1	72	26	30	26	12	1	1	0	0	0	0
6	1	1	76	23.4236	1	127	1	0	1	71	130	80	9.56	160	1.68	6.86	41.6	5.19	82	1	1	1	1	0	1	0	0	0	0	0	0	0	0	1	0	1	0	1	46	30	33	52	18	0	1	0	0	0	0
7	0	1	65	24.39	1	121	1	0	1	78	128	76	7.55	230	0.28	4.5	27	2.62	73	1	1	1	1	1	1	1	1	1	0	0	1	0	0	0	0	1	0	1	66	35	29	43	28	0	1	1	0	0	0
8	0	1	53	25.43	1	154	1	0	0	94	146	94	8.78	147	16	7.11	149	1.85	69	1	1	1	0	1	1	1	1	0	0	0	0	0	0	1	0	1	0	0	65	30	33	46	31	0	1	0	0	0	0
10	1	0	53	24.2188	1	132	0	0	0	74	157	105	15.09	282	0.017	10.58	38	4.51	56	1	1	1	1	0	1	0	1	0	0	0	0	0	0	1	0	0	0	1	41	30	32	47	17	0	1	0	0	0	0
10	1	1	60	23.4236	1	159	1	1	1	72	175	95	8.54	320	0.423	6.73	62.8	3.36	85.6	1	1	1	1	0	1	0	1	0	0	0	0	0	0	1	0	0	0	1	48	36	33	45	17	0	1	0	0	0	0
13	1	1	62	22.0604	1	165	1	0	1	80	120	90	15.18	148	0.064	4.89	137.9	3.41	70	1	1	1	1	0	2	0	0	0	0	0	0	0	0	1	1	1	0	1	33	33	34	46	16	0	1	0	0	0	0
10	0	1	39	22.86	1	149	1	0	1	82	100	70	12.75	230	3.81	5.57	53	2.52	83	1	1	1	1	0	1	0	0	0	0	0	0	0	0	1	0	0	0	0	50	26	33	45	31	0	1	0	0	0	0
11	1	1	68	23.4236	1	128	1	0	0	60	120	70	14.85	204	0.706	14.01	100.8	2.82	91	1	1	1	1	0	1	1	0	0	0	0	0	0	0	1	0	1	0	1	30	35	31	50	20	1	1	0	0	0	0
4	1	0	80	23.4236	0	118	1	0	1	60	120	72	7.71	139	10	5.81	44.2	2.55	90.5	1	1	1	1	0	4	1	1	0	0	0	0	0	0	1	0	2	0	1	51	35	35	49	19	0	0	1	1	0	0
9	1	1	69	19.6752	1	128	0	0	1	78	112	72	10.17	126	0.151	4.26	21.1	1.5	99.5	0	1	1	1	0	4	0	1	0	0	0	0	1	0	2	1	1	0	1	51	39	37	55	19	0	1	1	1	0	0
10	1	1	56	23.4236	1	130	1	0	1	86	170	110	9.88	268	10	6.86	41.6	2.77	65	1	1	1	1	0	1	0	1	0	0	0	0	0	0	1	0	1	0	1	46	39	38	53	20	0	1	0	0	0	0
18	0	1	77	22.04	1	115	1	0	0	91	110	60	8.44	193	1.334	4.89	16	2.31	113	0	1	1	1	0	3	0	1	0	0	0	1	1	0	0	2	0	0	0	65	33	30	46	28	0	0	1	1	0	0
7	1	1	52	24.8355	0	146	1	0	1	71	114	65	12.27	286	0.2621	8.4	28	2.01	63.8	1	1	1	0	0	1	0	0	0	0	0	0	0	0	0	0	0	1	0	62	28	32	42	28	0	1	1	0	0	0
10	1	1	75	22.8329	1	127	1	0	1	62	145	85	8.22	226	0.626	5.67	90.5	2.86	66.3	1	1	1	1	0	2	0	1	0	0	0	0	0	0	1	1	1	0	1	45	37	38	55	19	0	1	1	0	0	0
9	1	1	60	23.67	0	121	1	0	0	48	105	71	5.92	160	1.148	6.7	77	2.52	67	1	1	1	0	1	2	0	1	0	0	0	0	0	0	1	0	3	0	0	44	42	42	57	40	0	1	0	0	0	1
8	0	1	61	23.4236	1	111	1	0	1	96	130	85	6.01	156	1.77	18.53	16.4	3.78	121.9	1	1	1	1	0	2	1	1	1	0	0	0	0	0	1	1	0	0	1	40	39	39	56	17	0	0	1	0	0	0
11	1	1	52	23.4236	1	126	0	0	1	99	100	70	10.45	214	0.228	6.74	10.59	3.79	77	1	1	1	1	0	1	0	0	0	1	0	0	0	0	1	0	1	0	1	49	42	35	56	19	0	1	0	0	0	0
3	1	1	52	23.4236	0	138	1	0	1	65	120	80	11.02	190	1.47	5.18	82.4	3.77	79.2	1	1	1	1	0	1	0	0	0	0	0	0	0	0	2	0	1	0	1	42	36	32	57	17	0	1	0	0	0	0
8	1	1	69	23.4236	0	137	1	0	1	84	118	79	16.1	171	10	6.86	41.6	2.77	97.7	1	1	1	1	0	1	0	1	0	0	0	0	0	0	1	1	1	0	1	30	36	29	66	20	0	1	0	0	0	0
8	1	0	71	24.7475	0	97	0	0	0	70	85	50	6.16	156	0.976	4.93	24.5	2.61	84	0	1	1	1	0	2	0	1	0	0	0	0	0	0	2	1	1	0	1	40	51	37	56	19	0	0	1	1	0	0
22	1	0	85	23.0479	0	114	1	0	1	70	152	77	9.94	207	0.6416	7.37	15	2.97	97	1	1	1	1	0	2	0	1	1	0	0	0	0	0	1	0	1	0	0	34	26	28	45	22	1	1	0	0	0	0
15	1	1	64	23.4236	0	133	1	0	1	76	123	77	7.59	235	0.191	5.85	34.8	3.15	75.6	0	1	1	1	0	1	0	0	0	0	0	0	0	0	1	1	1	0	1	48	36	33	50	20	0	1	0	0	0	0
11	1	1	79	27.8635	0	125	1	0	1	75	180	95	5.54	85	0.604	5.22	49.7	2.31	132	1	1	1	1	0	1	0	1	0	0	1	0	0	0	0	0	1	0	0	45	40	35	55	20	0	1	0	0	0	0
7	1	1	76	22.66	0	143	1	0	1	66	128	68	9.55	209	16	4.21	47	1.69	139	0	1	1	1	0	2	0	1	0	0	0	0	0	0	1	1	1	0	0	46	33	32	40	30	1	1	0	0	0	0
5	1	1	77	23.4236	1	134	1	0	1	98	120	65	12.87	178	3.73	5.33	46.7	2.88	76.4	1	1	1	1	0	1	0	0	0	0	0	0	0	0	0	1	1	0	1	38	27	34	40	16	0	1	0	0	0	0
8	0	1	62	24.44	0	130	0	0	1	70	110	70	8.35	263	0.636	5.11	99	3.63	50	1	1	1	1	0	1	0	0	0	0	0	0	0	0	0	0	1	0	0	72	30	29	42	29	1	0	1	1	0	0
9	0	1	65	22.04	1	119	1	0	1	103	140	96	7.23	205	3.697	9.12	27	2.45	93	0	1	1	1	0	1	1	1	0	0	0	0	1	0	3	0	0	0	0	33	41	31	57	29	1	0	1	1	0	0
5	1	1	79	23.4236	1	121	1	0	1	69	106	70	8.19	187	0.144	4.51	4	1.95	75.2	0	1	1	1	0	1	0	0	0	0	0	0	0	0	1	1	2	0	1	63	27	38	40	19	0	1	1	1	0	0
9	1	1	63	22.9854	1	133	1	0	1	81	180	130	9.08	141	0.016	6.3	55.5	2.54	53	1	1	1	1	0	1	0	1	0	0	0	0	0	0	0	0	1	0	1	44	34	39	50	20	0	1	0	0	0	0
7	0	1	56	23.8751	1	107	1	1	1	69	111	59	5.2	156	0.214	5.88	38.8	3.16	93.2	0	1	1	1	0	1	0	1	0	0	0	0	0	0	0	0	0	0	1	60	31	36	49	17	0	1	0	0	0	0
3	1	1	50	23.4236	1	152	1	1	1	96	140	90	10.81	148	0.545	18.58	77.1	3.26	70.7	0	1	1	1	0	1	1	1	0	0	0	0	0	0	1	1	1	0	1	45	36	30	47	18	0	1	0	0	0	0
7	0	0	75	26.7094	1	130	1	1	1	76	160	110	10.57	176	0.018	4.55	17.3	3.55	78	0	1	1	0	0	2	0	1	0	0	0	0	0	0	1	1	0	0	1	68	35	32	45	19	0	1	0	0	0	0
10	0	1	72	23.4236	1	115	0	1	0	85	120	80	8.15	117	2.24	5.24	16	2.95	159	1	1	1	1	0	1	0	1	0	0	0	0	0	0	0	0	1	0	1	68	39	35	52	21	0	1	0	0	0	0
17	1	1	50	24.539	1	160	1	0	1	100	112	70	24.04	287	1.59	8.29	172.2	3.69	77.4	1	1	1	1	0	4	0	0	0	0	0	0	0	0	1	1	1	0	1	39	42	33	52	18	0	1	0	0	0	0
15	0	0	69	17.59	0	112	1	1	0	113	154	77	9.8	238	0.698	7.2	26	2.32	76	1	1	1	1	0	4	1	1	0	0	0	0	0	0	1	1	1	0	0	43	35	26	50	28	0	1	1	1	0	0
9	0	1	66	27.6817	0	138	1	1	1	85	160	90	7.97	195	0.069	5.28	27.6	1.59	94.3	1	1	1	1	0	1	0	1	0	0	0	0	0	0	1	1	1	0	1	65	35	35	49	19	0	0	1	0	0	0
5	0	1	75	29.14	0	113	1	0	0	70	119	82	8.48	126	4.25	6.15	43	1.87	81	1	1	1	0	1	1	0	1	1	0	0	0	0	0	1	0	1	0	1	56	37	31	58	33	0	1	0	0	0	0
23	0	0	65	22.48	0	150	1	0	1	103	103	98	11.02	271	1.209	9.32	57	1.8	48	0	1	1	1	0	1	1	0	0	0	0	0	0	0	1	0	0	0	0	34	33	26	52	27	1	1	0	0	0	0
5	0	0	52	23.0469	0	141	1	0	1	68	120	80	10.29	164	0.152	5.64	42.4	4.03	47.7	0	1	1	1	0	1	0	0	0	0	0	0	0	0	1	0	1	0	1	51	35	35	49	19	0	1	0	0	0	0
13	0	1	48	24.86	0	164	1	0	1	94	122	92	13.23	169	16	4.59	97	3.32	79	1	1	1	1	0	1	1	0	0	0	0	0	0	0	1	0	0	0	0	40	31	29	48	29	0	1	0	0	0	0
9	0	1	80	25.16	1	116	1	0	0	68	113	62	6.71	226	16	5.59	51	3.32	88	1	1	1	1	0	1	0	1	0	0	0	0	0	0	2	1	1	0	0	44	32	33	56	29	0	1	0	0	0	0
4	1	1	45	23.4236	1	134	1	0	1	80	110	70	7.59	195	0.129	5.05	22.4	1.99	65	0	1	1	1	0	1	0	0	0	0	0	0	0	0	1	0	1	0	1	51	35	35	49	19	0	0	1	0	0	0
3	1	1	67	23.4236	0	121	1	0	1	80	120	70	8.54	224	0.206	5.52	25.2	2.85	77	1	1	1	1	0	1	0	0	0	0	0	0	1	1	1	0	0	0	1	48	37	33	45	19	0	1	0	0	0	0
20	1	0	75	23.4236	0	111	1	0	1	78	117	77	11.66	239	1.19	19.1	80.2	2.25	100.4	1	1	1	1	0	3	1	0	1	0	0	0	0	0	1	1	2	0	1	31	31	30	47	16	0	1	0	0	0	0
5	1	1	67	20.2	1	147	1	0	1	62	135	90	4.36	197	4.379	6.16	17	2.19	91	0	1	1	0	1	1	0	0	0	0	0	0	0	0	1	0	1	0	0	42	30	31	53	31	1	1	0	0	0	0
12	1	0	67	23.4236	0	117	1	0	1	80	140	100	15.92	245	9.48	6.84	34	3.23	120.8	0	1	1	1	0	3	0	1	1	0	0	0	0	0	2	1	0	0	1	51	35	35	54	19	0	0	1	1	0	0
11	0	0	72	23.5556	1	119	1	0	0	56	140	80	11.58	254	0.489	5.64	13.5	3.85	73	0	1	1	1	0	2	0	1	0	0	0	0	0	0	1	0	1	0	1	36	34	35	49	19	0	0	1	0	0	1
12	1	1	52	23.4236	1	169	1	0	1	75	130	75	12.8	206	0.421	7.09	45	2.74	53	1	1	1	1	0	1	0	0	0	0	0	0	0	0	1	0	0	0	1	60	37	33	46	20	0	1	0	0	0	0
12	0	1	68	24.8016	1	78	0	0	1	105	120	83	6.83	355	0.153	7.57	5.8	2.95	62.5	0	1	1	1	0	1	1	1	0	0	0	0	0	0	1	1	0	0	1	66	37	38	47	18	0	1	1	0	0	0
15	0	1	54	24.2369	1	125	1	0	1	83	150	72	16.54	225	0.2267	13.37	24	2.8	92	1	1	1	1	0	1	0	1	0	0	0	0	0	0	1	1	0	1	0	58	31	28	40	26	0	1	0	0	0	0
9	0	1	69	23.88	0	102	1	1	1	69	125	70	7.96	216	0.728	3.91	27	1.5	193	1	1	1	1	0	1	1	1	0	0	0	0	0	0	1	0	1	1	0	66	35	30	47	30	0	1	0	0	0	0
14	0	1	68	18.3655	1	125	0	0	0	63	83	57	14.74	166	7.58	5.26	29.5	2.06	210.5	0	1	1	1	0	4	0	0	0	1	0	0	0	0	0	1	0	0	0	57	35	35	49	19	0	1	0	0	0	0
16	1	1	72	34.049	1	126	1	0	1	69	120	60	6.42	138	0.095	5.27	18.4	1.7	83	1	1	1	1	0	2	0	1	0	0	0	0	1	0	1	0	1	0	1	51	35	35	49	19	0	1	1	0	0	0
10	1	0	42	30.4688	0	140	1	1	1	95	180	100	12.01	269	0.045	6.49	22.2	3.39	53.3	1	1	1	1	0	1	0	1	0	0	0	0	0	0	0	0	0	0	1	71	36	35	47	20	0	0	0	0	0	0
27	1	0	48	31.11	0	131	1	0	1	94	118	76	12.18	301	16	10.29	108	3.85	90	1	1	1	1	0	4	0	1	0	0	0	0	0	0	0	0	1	0	0	42	30	25	41	25	0	1	0	0	0	0
5	1	0	78	27.268	1	118	1	0	1	84	135	90	10.41	314	0.183	4.92	9.5	2.79	90	0	1	1	1	0	1	0	1	0	0	0	0	0	0	1	0	1	0	1	51	35	35	49	19	0	1	0	0	0	0
7	0	1	76	20.5693	0	129	1	0	1	70	150	80	13.58	181	0.304	4.98	14.8	4.15	87	0	1	1	1	0	1	0	1	0	0	0	0	0	0	1	1	1	0	1	51	35	35	49	19	0	0	1	1	0	0
8	0	0	65	23.6418	0	128	1	0	0	76	180	120	6.46	183	0.2622	7.21	15	3.08	114	1	1	1	1	0	2	0	1	0	0	0	0	0	0	1	1	0	0	0	54	27	28	43	25	0	1	0	0	0	0
10	1	1	77	19.8141	1	124	1	1	1	82	168	92	6.9	190	0.039	4.59	18.5	1.7	120	0	1	1	1	0	2	0	1	1	0	0	0	0	0	1	1	1	0	1	56	39	37	48	19	0	1	1	0	0	0
9	1	1	84	23.4019	0	113	1	0	1	126	220	130	6.99	194	1.399	9.34	29	2.49	169	0	1	1	1	0	4	0	0	0	1	0	0	0	0	2	1	1	1	0	48	40	34	62	28	0	1	0	0	0	0
12	0	1	47	25.1377	0	145	1	0	0	80	130	80	7.02	148	0.01554	8.4	31	2.63	92	1	1	1	1	0	1	0	0	0	0	0	0	0	0	0	0	0	0	0	58	28	33	44	30	0	1	0	0	0	0
7	1	1	47	25.2126	1	138	1	0	0	84	130	90	8.87	452	0.9514	5.29	75	1.68	152.8	1	1	1	1	0	1	0	1	0	0	0	0	0	0	1	0	0	0	0	60	35	34	51	34	0	1	0	0	0	0
13	1	1	63	24.7721	1	132	1	0	1	76	104	70	10.22	162	3.02	6.23	57.3	2.13	58	0	1	1	1	0	2	0	0	0	0	0	0	0	0	1	1	1	0	1	40	36	34	51	20	0	1	0	0	0	0
16	0	1	54	23.4236	1	122	1	0	1	90	120	85	10.7	178	10	4.24	42.7	3.86	72	1	1	1	1	0	1	0	0	0	0	0	0	0	0	2	0	1	0	1	53	33	39	51	17	0	1	0	0	0	0
8	0	0	83	17.7778	0	123	1	1	1	90	140	80	6.25	238	0.12	4.1	13.7	2.2	65	0	1	1	1	0	2	0	1	0	0	0	1	0	0	1	1	1	0	1	29	38	32	60	16	0	0	1	1	0	0
23	1	1	56	23.8203	1	124	0	0	1	100	79	52	14.17	200	1.047	16.52	51	4.05	163.5	1	1	1	1	0	1	1	0	0	1	0	0	0	0	0	0	0	0	0	52	27	26	40	23	1	1	1	0	0	0
18	1	1	77	23.03	0	116	1	1	1	80	122	60	8.78	300	3.77	5.21	14.2	1.37	86	1	1	1	1	0	2	0	1	0	0	1	1	1	0	1	1	1	0	1	43	39	35	49	19	0	1	0	1	0	0
10	1	1	41	19.9219	1	138	0	0	0	64	120	80	9.39	139	0.055	7.41	44.3	2.17	66	1	1	1	1	0	1	0	0	0	0	0	0	0	0	1	0	1	0	0	65	26	32	27	16	0	1	0	0	0	0
20	1	1	68	23.4236	1	135	1	0	1	86	165	95	10.42	248	0.235	4.27	11.3	3.44	64.9	1	1	1	1	0	2	0	1	0	0	0	0	0	0	0	0	0	0	1	38	37	37	56	21	0	1	0	0	0	0
6	0	1	67	20.76	1	117	0	0	0	98	120	80	5.93	265	1.223	4.63	20	1.72	92	0	1	1	1	0	2	0	0	0	0	0	0	0	0	2	1	2	1	0	34	31	32	66	36	0	0	1	1	0	0
15	1	1	73	23.4852	1	101	0	0	0	88	100	60	8.01	183	4.259	8.09	80	2.79	92.3	0	1	1	1	0	3	0	0	0	0	0	0	0	0	1	0	1	0	1	34	40	35	55	35	0	0	1	1	0	0
16	0	1	60	24.38	0	158	0	0	1	80	103	71	8.15	475	0.669	6.92	38	1.56	83	0	1	1	1	0	1	1	0	1	0	0	0	0	0	1	0	0	0	0	49	42	30	58	27	0	0	1	1	0	0
11	1	1	71	23.4236	1	145	1	0	1	76	182	106	7.6	202	0.123	4.69	33.6	3.93	53.4	0	1	1	1	0	1	0	0	0	0	0	0	0	0	1	1	1	0	1	56	36	36	43	19	0	1	0	0	0	0
7	0	0	61	23.4151	0	126	1	0	0	71	136	80	10.64	161	0.5049	9.71	32	4	63.7	1	1	1	0	0	1	0	0	0	0	0	0	0	0	1	0	0	0	1	55	25	32	40	28	0	1	0	0	0	0
13	1	0	66	20.4082	0	105	1	0	1	80	120	75	8.17	382	0.045	4.97	25.7	4.34	55	1	1	1	1	0	3	0	1	0	0	0	0	0	0	1	1	1	0	1	39	35	35	47	19	0	1	0	0	0	0
10	1	1	88	23.4236	1	96	1	0	1	70	102	70	6.16	216	3.12	4.57	16.2	2.85	110.7	1	1	1	1	0	2	0	1	0	0	0	0	0	0	1	2	2	0	1	41	38	43	60	19	0	1	0	0	0	0
4	1	1	50	28.17	0	118	1	0	1	68	115	70	5.67	241	1.185	6.79	13	1.05	71	1	1	1	1	0	3	1	0	0	0	0	0	0	0	1	0	0	0	0	54	33	30	49	29	0	1	1	0	0	0
11	1	1	51	24.672	1	139	1	0	1	90	153	83	11.76	284	0.01984	8.18	19	3.44	76.7	1	1	1	0	0	1	0	1	0	0	0	0	0	0	1	0	0	0	0	72	31	35	52	24	1	1	0	0	0	0
9	1	1	45	24.22	1	151	1	0	1	70	127	74	14.75	233	16	5.79	130	2.82	87	1	1	1	1	1	1	0	0	0	0	0	0	0	0	1	0	0	0	0	45	33	29	45	25	0	1	0	0	0	0
8	1	1	78	23.2082	0	129	1	0	1	75	161	82	9.07	325	0.2783	7.84	12	1.32	54	1	1	1	1	0	1	0	0	0	0	0	0	0	0	1	1	1	0	1	60	43	32	47	32	0	1	0	0	0	0
9	0	0	68	29.7778	0	118	1	1	1	76	170	90	5.39	177	0.022	5.62	13.5	2.13	161	1	1	1	1	0	2	0	1	1	0	1	0	0	0	1	1	0	0	1	65	37	38	46	19	0	0	1	1	0	0
5	1	1	67	23.4236	1	110	1	0	1	91	97	56	9.78	226	6.74	6.42	41.6	2.77	107	0	1	1	1	0	1	0	0	0	0	0	0	0	0	1	1	3	1	1	66	35	35	48	19	0	0	0	0	0	0
6	0	0	82	23.83	0	114	1	0	1	73	127	77	5.36	177	6.957	5.03	16	3.93	53	0	1	1	1	0	2	0	1	1	0	0	0	0	0	1	1	1	0	0	45	34	27	47	28	0	1	0	0	0	0
8	1	0	72	25.39	0	121	1	0	1	94	120	76	10.81	276	3.899	4.1	31	2.17	72	1	1	1	0	1	1	0	1	0	0	0	0	0	0	0	0	0	1	0	61	30	27	44	27	0	1	0	0	0	0
3	1	1	75	23.4236	1	136	0	0	0	84	117	84	8.89	191	1.81	4.09	23.2	2.12	78	0	1	1	1	0	2	0	1	0	0	0	0	0	0	0	0	1	1	0	51	39	36	52	16	0	1	1	0	0	0
12	1	1	74	23.9518	0	121	0	0	0	68	120	76	8.69	202	4.387	8.4	45	0.96	96.6	1	1	1	1	0	1	0	0	0	0	0	0	0	0	1	0	0	0	1	60	33	38	48	35	0	1	0	0	0	0
10	1	1	48	24.2215	0	143	1	0	1	80	140	70	11.15	169	7.34	11.23	41.6	3.81	73	1	1	1	1	0	1	0	1	0	0	0	0	0	0	1	0	2	1	1	45	38	38	50	20	0	0	1	0	0	0
10	1	1	48	24.2215	0	143	1	0	1	80	140	70	11.15	169	7.34	11.23	41.6	3.81	73	1	1	1	1	0	1	0	1	0	0	0	0	0	0	1	0	2	1	1	45	38	38	50	20	0	0	0	0	0	0
10	0	1	50	23.41	1	151	1	0	1	58	128	80	8.35	336	2.27	4.81	52	2.69	70	1	1	1	1	0	1	1	1	0	0	0	0	0	0	1	0	1	0	0	66	31	27	44	31	0	0	1	0	0	1
10	0	1	50	23.41	1	151	1	0	1	58	128	80	8.35	336	2.27	4.81	52	2.69	70	1	1	1	1	0	1	1	1	0	0	0	0	0	0	1	0	1	0	0	66	31	27	44	31	0	0	0	0	0	1
9	0	1	61	24.2215	1	153	0	0	0	95	150	95	10.21	310	0.251	4.46	18	3.3	77	1	1	1	1	0	1	0	0	0	0	0	0	0	0	1	0	0	0	1	70	21	37	46	20	0	0	0	0	0	0
13	0	0	78	23.81	0	126	1	0	1	122	131	75	3.94	146	0.317	4.98	30	2.74	82	0	1	1	1	0	3	0	0	0	0	0	0	0	0	1	1	0	0	0	36	38	30	56	28	0	1	0	0	0	0
13	0	1	70	20.9366	1	127	1	1	1	68	150	70	7.3	134	0.103	5.38	25.1	1.69	86.5	1	1	1	1	0	1	0	1	0	0	0	0	0	0	1	1	2	0	1	63	36	50	58	18	0	1	1	0	0	0
14	0	1	69	23.4236	1	120	0	0	0	67	109	62	7.08	71	0.328	5.41	39.5	1.6	67.3	1	1	1	1	0	1	0	0	0	0	0	0	1	0	1	0	1	0	1	60	36	36	50	19	0	1	0	0	0	0
14	1	1	69	23.939	0	103	1	0	1	85	135	85	11.32	207	3.18	6.54	41.6	3.02	89	0	1	1	1	0	3	1	1	0	0	0	0	0	0	1	0	1	0	1	39	31	34	48	19	0	1	0	1	0	0
10	1	0	58	23.4236	0	129	0	0	0	78	130	80	9.39	162	8.84	9.28	34.4	1.34	59	1	1	1	1	0	1	1	0	0	0	0	0	0	0	1	1	1	0	1	49	36	34	47	20	0	1	1	0	0	0
10	1	1	46	21.36	0	142	0	0	1	81	110	60	5.77	266	0.149	5.1	121	2.09	84	1	1	1	1	1	2	0	0	0	0	0	0	0	0	1	0	1	0	1	57	31	32	47	33	0	0	1	0	0	0
10	1	0	85	23.7248	0	138	0	0	0	55	160	100	10.93	157	0.01273	8.4	12	3.01	64	1	1	1	1	0	1	0	0	0	0	0	0	0	0	1	1	1	0	1	60	39	30	40	30	1	0	1	0	0	1
5	1	0	67	26.0375	0	123	1	0	1	74	130	70	5.31	218	0.355	6.89	33.7	3.93	75	0	1	1	1	0	1	0	1	0	0	1	0	0	0	0	1	1	0	1	51	35	35	49	19	1	0	1	0	0	0
9	0	0	53	25.39	0	101	1	0	1	68	134	72	7.26	151	1.551	13.93	31	3.85	42	1	1	1	1	0	2	1	1	0	0	0	0	0	0	0	1	0	0	0	52	31	29	46	27	1	1	0	0	0	0
11	1	1	70	23.18	0	130	0	0	1	70	90	56	11.04	175	10.54	4.35	27	1.93	76	1	1	1	1	0	1	0	0	0	0	0	0	0	0	0	0	0	1	1	57	29	27	48	24	0	1	0	0	0	0
6	0	1	52	22.72	1	131	0	0	1	74	118	90	10.87	242	1.214	5.54	24	1.9	72	1	1	1	1	0	1	0	0	0	0	0	0	0	0	1	0	0	0	1	59	39	32	47	32	0	1	0	0	0	0
10	1	1	48	24.2215	1	148	1	0	1	78	166	108	11	221	0.615	5.9	50.6	3.55	56.7	1	1	1	1	0	2	0	1	0	0	0	0	0	0	1	1	1	0	1	35	38	39	57	20	0	1	0	0	0	0
3	1	1	69	24.78	1	129	1	1	1	65	142	78	5.3	207	0.001	5.12	46	1.47	91	1	1	1	1	0	1	1	1	0	0	0	0	0	0	1	0	0	0	0	54	33	30	49	29	0	1	0	0	0	0
6	1	1	51	22.11	1	127	1	0	0	62	134	70	5.36	107	11.848	5.42	30	2.12	61	1	1	1	1	0	1	1	1	0	0	0	0	0	0	1	0	0	0	0	54	33	30	49	29	0	1	0	0	0	0
13	1	1	64	21.2245	1	144	0	0	1	102	113	85	8.97	169	0.022	6.57	15	2.94	70	1	1	1	1	0	2	0	0	0	0	0	0	0	0	1	0	2	0	1	45	48	65	44	23	0	1	0	0	0	0
7	1	1	65	19.052	1	114	0	0	0	55	100	60	6.63	138	1.05	3.99	15.2	1.88	60	1	1	1	1	0	2	0	0	0	0	1	0	0	0	1	1	1	0	1	72	27	32	45	19	0	1	0	0	0	1
10	1	1	72	17.15	1	105	0	0	1	68	160	78	4.29	136	0.964	28.61	14	1.86	68	1	1	1	0	1	1	0	1	0	0	0	0	0	0	1	0	1	0	0	47	28	29	45	30	1	1	0	0	0	0
8	1	0	66	23.4236	0	116	1	0	1	80	110	60	12.3	121	10	7.5	41.6	3.11	65	1	1	1	1	0	4	0	1	0	0	0	0	0	0	1	0	1	0	1	25	36	35	56	17	0	1	0	0	0	0
8	0	0	76	21.875	0	134	1	0	1	83	158	70	5.22	114	0.117	4.7	8.9	3.01	54	0	1	1	1	0	1	0	0	0	0	0	0	0	0	1	0	1	0	1	51	35	35	49	19	0	1	0	0	0	0
9	1	1	71	24.677	0	127	1	1	1	78	120	70	6.73	201	0.694	5.71	109.6	1.36	86.4	1	1	1	1	0	1	0	1	0	0	0	0	0	0	1	0	1	0	1	50	35	33	57	19	0	1	0	0	0	0
10	0	1	60	25.7117	0	139	0	0	0	58	110	60	9.05	206	0.012	4.54	15.4	2.57	83	0	1	1	1	0	1	0	0	0	0	1	0	0	0	0	1	1	0	1	65	29	37	45	19	0	1	0	0	0	1
7	0	0	64	27.5312	0	130	1	0	1	68	140	80	10.54	207	0.117	5.18	14.1	3.45	55.1	1	1	1	1	0	1	0	0	0	0	1	0	0	0	1	0	1	1	1	57	35	32	48	15	0	1	1	0	0	0
19	1	1	64	23.4024	0	124	0	0	1	96	142	80	8.79	283	0.5635	10.53	17	2.98	55.6	1	1	1	1	0	1	1	0	0	0	0	0	0	0	2	1	2	0	0	38	37	30	48	28	1	1	1	0	0	0
9	1	0	67	23.4236	0	131	1	0	1	90	154	106	12.36	239	1.64	5.1	75.4	1.21	52	1	1	1	1	0	1	0	1	0	0	0	0	0	0	1	1	1	0	1	45	34	31	52	19	0	0	1	0	0	0
5	1	1	54	22.31	0	141	1	0	1	62	120	70	5.12	241	0.252	4.62	114	2.3	85	1	1	1	1	0	1	0	0	0	0	0	0	0	0	1	0	0	0	1	64	33	33	51	35	0	1	0	0	0	0
2	1	1	66	24.2215	1	115	1	0	0	65	110	62	13.42	109	6.51	6.39	12.84	2.67	146	0	1	1	1	0	2	0	1	0	0	0	0	0	0	0	0	1	0	1	57	37	37	48	19	0	1	0	0	0	0
30	1	0	83	23.4236	0	114	0	0	0	70	80	60	8.99	205	0.064	6.14	28.8	1.59	86	1	1	1	1	0	4	0	1	1	1	0	0	0	1	0	1	1	0	1	26	35	35	56	19	0	0	1	0	0	0
25	0	0	66	27.0552	0	109	1	0	1	86	136	80	8.87	168	5.05	6.28	25.3	5.64	90.2	1	1	1	1	0	4	0	1	0	0	0	0	0	0	0	2	2	0	1	66	35	35	50	19	1	0	0	0	1	0
12	1	0	62	23.1781	0	113	1	0	1	64	136	82	6.11	131	1.099	8.4	34	2.45	92	1	1	1	1	0	1	0	1	1	0	0	0	0	0	1	1	1	0	1	58	31	28	45	25	1	1	0	0	0	0
20	1	1	50	28.03	1	178	1	0	1	82	113	75	14.55	187	16	5.39	76	2.89	91	1	1	1	0	1	1	0	1	0	0	0	0	0	0	1	0	0	0	0	54	33	30	49	29	0	0	1	0	0	0
6	0	1	50	21.3839	1	146	0	0	0	80	142	94	7.56	210	0.162	5.21	25.8	2.72	93.1	1	1	1	1	0	1	0	0	0	0	0	0	0	0	1	0	0	0	1	59	26	35	49	18	0	0	1	0	0	0
7	1	1	84	27.3438	0	137	1	0	1	105	125	70	7.82	171	3.17	6.86	41.6	2.05	132	1	1	1	1	0	2	0	1	0	0	0	0	0	0	0	1	1	0	1	51	35	35	49	19	0	1	0	0	0	0
10	1	1	70	17.01	1	115	1	0	1	80	141	80	9.09	182	8.05	4.89	47	1.36	98	1	1	1	1	0	1	0	1	0	0	0	0	0	0	0	0	1	1	1	43	28	26	42	28	0	1	0	0	0	0
8	1	0	77	21.6813	0	102	0	0	0	76	130	70	6.56	149	0.00943	5.56	21	4.15	54.9	1	1	1	0	0	2	0	0	0	0	0	0	0	0	1	0	0	0	0	37	27	28	48	22	0	1	1	0	0	0
8	0	1	77	23.15	1	121	0	0	1	64	93	56	7.5	167	14.476	3.96	6	1.63	83	0	1	1	0	1	1	1	0	0	0	0	0	0	0	1	0	1	0	1	61	30	23	36	25	1	1	0	0	0	0
9	1	1	34	23.32	1	157	1	0	1	72	122	89	13.73	251	10.063	5.78	57	2.47	62	1	1	1	1	1	1	0	1	0	0	0	0	0	0	1	0	0	0	0	54	33	30	49	29	0	1	0	0	0	0
11	0	0	74	20.83	0	108	1	0	0	72	134	68	4.98	92	0.886	4.71	80	2.86	66	1	1	1	0	1	1	0	1	0	0	0	0	0	0	1	1	1	0	0	50	37	27	41	26	0	1	0	0	0	0
12	1	1	66	17.9982	1	131	1	0	0	60	137	78	6.1	126	0.874	6.67	320.5	2.21	69	1	1	1	1	0	1	0	1	0	0	0	0	0	0	1	0	1	1	1	75	34	34	41	20	0	1	0	0	0	0
9	1	1	60	22.9998	0	112	0	0	1	72	90	58	9.41	206	4.158	6.18	72	1.88	81.9	1	1	1	0	0	1	0	0	0	0	0	0	0	0	1	0	1	0	0	20	33	26	61	22	1	1	0	0	0	0
12	1	0	73	23.11	0	114	1	0	1	82	130	81	10.09	245	0.085	5.15	13	1.58	70	1	1	1	1	0	2	0	1	0	0	0	0	0	0	2	0	1	1	0	43	38	31	50	30	0	0	1	1	0	0
10	0	1	78	28.3737	0	131	1	1	1	90	155	78	4.23	135	0.378	4.09	251.2	4.03	104	0	1	1	1	0	1	0	1	0	0	0	0	0	0	2	0	3	0	1	68	46	33	45	22	0	0	0	0	0	0
22	1	0	70	22.97	0	106	1	1	1	81	155	111	11.95	120	1.436	16.2	28	3.03	59	1	1	1	1	0	4	1	1	0	0	0	0	0	1	1	0	1	0	0	41	35	31	46	31	1	0	0	0	0	0
9	1	1	48	26.8274	1	152	1	0	1	80	164	115	11.81	148	4.91	3.97	38.2	1.98	86	1	1	1	1	0	1	1	1	0	0	0	0	0	0	1	0	1	0	1	46	33	37	48	18	0	1	0	0	0	0
10	1	0	48	22.2222	0	132	1	0	1	72	116	85	12.71	288	0.022	4.58	34.2	1.64	57	1	1	1	1	0	1	0	1	0	0	0	0	0	0	1	0	2	0	1	60	28	36	46	19	0	1	0	0	0	0
8	1	1	64	21.4844	1	131	1	0	1	60	110	70	5.17	89	0.904	4.24	24.1	1.64	79	1	1	1	1	0	1	0	1	0	0	0	0	0	0	1	1	1	1	1	72	35	41	51	16	0	1	0	0	0	0
12	0	1	83	27.5482	1	103	1	0	1	83	110	80	12.23	172	3.27	5.25	40	3.37	118	1	1	1	1	0	3	0	0	0	0	0	0	0	0	1	0	0	0	1	37	33	34	56	18	0	1	0	0	0	0
19	1	1	47	23.8626	1	120	1	0	0	71	110	70	6.67	188	0.7966	5.12	23	2.04	84.2	1	1	1	1	0	2	0	0	0	0	0	0	0	0	0	0	0	0	0	55	30	28	58	25	1	1	1	1	0	0
16	1	0	76	23.4236	0	114	0	0	0	78	130	70	8	190	0.083	6.56	76.7	1	58	1	1	1	1	0	1	0	0	0	0	0	0	0	0	0	0	3	0	1	61	29	38	42	19	0	0	1	0	0	0
4	0	0	66	21.7555	0	119	1	0	0	78	120	78	12.94	207	0.258	7.05	37.3	2.59	53	0	1	1	1	0	1	0	0	0	0	0	0	0	0	1	0	1	0	1	51	35	35	49	19	0	0	0	0	1	0
10	0	1	78	24.0754	1	115	0	0	0	120	180	90	19.36	180	7.501	7.22	77	2.37	182.5	0	1	1	1	0	4	0	1	0	0	0	0	0	0	1	1	1	0	0	51	43	34	55	33	0	1	0	1	0	0
3	1	1	62	23.4236	1	121	1	0	0	55	100	60	8.14	138	0.579	4.48	86.9	1.83	115	0	1	1	1	0	1	0	1	0	0	0	0	0	0	1	1	1	0	1	51	35	35	49	19	0	1	1	0	0	1
7	1	1	70	21.45	1	151	0	0	1	76	119	64	5.7	162	0.001	4.61	27	1.89	119	1	1	1	1	0	1	0	1	0	0	0	1	0	0	1	0	1	1	0	38	41	31	63	31	0	0	0	0	0	0
7	1	1	75	19.5312	1	138	0	1	0	49	179	90	6.69	93	0.012	5.15	17.9	1.75	98	0	1	0	0	0	1	0	1	0	0	0	0	0	0	1	1	1	0	1	68	35	37	47	17	0	0	1	0	0	1
8	0	0	76	24.78	0	113	1	0	1	78	113	72	5.17	123	1.821	5.93	17	2.05	84	0	1	1	0	1	1	0	1	0	0	0	0	0	0	1	1	1	0	0	53	34	26	44	24	1	1	0	0	0	0
8	1	1	58	27.43	1	135	1	0	1	66	91	61	10.31	229	6.743	5.78	56	2.38	107	1	1	1	0	1	1	1	1	0	0	0	0	0	0	1	0	0	0	0	51	27	23	46	24	0	0	1	0	0	0
13	1	0	73	23.5323	0	116	1	1	0	61	140	80	17.5	180	0.5756	10.44	39	2.56	89.2	0	1	1	1	0	1	0	1	0	0	0	0	0	0	1	0	0	0	0	45	37	35	36	27	0	1	0	0	0	0
4	0	1	64	23.94	1	50	0	0	0	108	110	73	4.33	94	3.1	6.7	65	2.52	157	0	1	1	1	0	4	0	1	0	1	0	0	0	0	1	0	0	0	0	54	33	30	49	29	0	1	0	1	1	0
8	1	1	52	23.4375	1	151	1	0	1	80	130	92	12.98	238	0.236	5.93	113.2	2.62	68	1	1	1	1	0	1	0	1	0	0	0	0	0	0	1	0	2	0	1	54	38	35	48	16	0	1	0	0	0	0
4	0	1	50	25.1	0	147	1	0	1	62	133	78	11.27	186	4.891	8.38	35	1.52	94	1	1	1	0	1	1	1	1	0	0	0	0	0	0	0	0	1	0	1	53	31	26	46	27	0	0	0	0	0	0
6	1	1	62	24.6389	0	135	1	0	1	75	189	105	12.55	218	0.07124	8.4	39.14	2.7	92	1	1	1	0	0	1	0	0	0	0	0	0	0	0	0	0	0	0	0	58	26	33	35	30	0	1	0	0	0	0
9	0	1	81	21.91	0	109	1	0	1	93	86	41	8.02	169	3.28	6.97	131	1.46	100	0	1	1	0	1	2	0	0	0	0	0	0	0	0	1	1	1	0	0	43	33	34	45	34	0	1	0	0	0	0
12	1	1	67	23.3091	1	139	1	0	0	87	145	88	9.37	143	0.206	6.44	72.5	1.26	69	0	1	1	1	0	1	0	0	0	0	0	0	0	0	0	0	1	1	1	63	33	35	44	19	0	0	0	0	0	0
12	1	1	55	23.4236	1	130	0	0	0	100	90	62	9.36	182	1.03	4.93	22.7	2.97	109	1	1	1	1	0	4	0	1	1	1	0	0	0	0	1	0	0	0	1	58	29	35	46	19	0	1	1	0	0	0
9	1	1	68	20.95	1	144	1	0	0	78	92	54	9.94	159	7.041	7.83	95	1.82	100	1	1	1	0	1	1	0	0	0	0	0	0	0	0	1	0	1	0	0	45	32	29	47	27	0	1	0	0	0	0
12	1	0	65	23.4236	0	124	1	0	1	98	110	60	13.58	341	2.07	6.1	23.6	2.07	64	1	1	1	1	0	1	1	0	0	0	0	0	0	0	1	1	1	0	1	49	34	33	41	16	0	1	1	0	0	0
12	0	1	54	23.4236	1	145	0	0	1	100	120	72	9.85	300	5.83	5.01	37.8	2.45	68	1	1	1	1	0	1	0	0	0	0	0	0	0	0	1	0	0	0	1	57	34	33	46	16	0	1	1	0	0	0
9	1	0	46	23.4221	0	142	1	0	1	100	125	75	11.73	234	1.44	4.81	45.4	2.2	56	1	1	1	1	0	1	0	0	0	0	0	0	0	0	0	0	0	0	1	46	35	35	49	19	0	1	1	0	0	0
10	1	1	62	25.3906	0	132	1	0	1	80	120	72	12.44	194	5.59	6.66	41.6	2.44	55	1	1	1	1	0	1	1	0	0	0	0	0	0	0	1	1	1	0	1	62	30	33	42	17	0	1	0	0	0	0
9	1	1	53	23.4236	1	155	1	0	0	52	154	90	13.29	202	0.4	5.29	84.4	3.32	95	1	1	1	1	0	2	0	0	0	0	0	0	0	0	0	0	0	0	0	49	35	35	45	17	0	1	0	0	0	1
4	1	1	59	23.4236	1	120	1	0	0	110	113	53	8.49	110	0.108	4.55	59.1	2.64	87	0	1	1	1	0	3	0	0	0	0	0	0	1	1	1	1	1	0	1	48	35	35	65	19	0	0	1	1	0	0
8	0	1	60	25.47	1	136	1	1	1	89	140	90	6.4	285	1.996	4.22	17	2.07	77	0	1	1	1	0	1	0	1	0	0	0	0	0	0	1	0	1	0	1	64	36	32	52	27	1	1	0	0	0	0
11	1	0	64	20.5457	0	156	1	0	1	80	160	90	24.11	296	2.62	3.97	32.5	3.74	59	1	1	1	1	0	1	0	1	0	0	0	0	0	0	1	0	1	0	1	51	35	35	49	19	0	0	1	0	0	0
13	1	1	77	21.79	1	151	1	1	1	127	95	70	9.17	275	2.06	4.52	60.1	3.6	66	1	1	1	1	0	3	0	1	0	0	0	0	0	0	0	1	1	0	1	56	34	34	45	20	0	0	0	0	0	0
11	1	1	37	27.68	1	153	0	0	1	78	124	87	12.6	290	8.813	5.52	69	2.82	108	1	1	1	0	1	1	0	0	0	0	0	0	0	0	1	0	0	0	0	47	32	31	49	28	0	1	0	0	0	0
6	1	1	38	39.79	1	152	1	0	1	61	96	62	10.62	251	3.252	6.06	34	2.16	69	1	1	1	1	0	2	0	0	0	0	0	0	0	0	1	0	0	0	0	48	35	33	52	32	0	1	0	0	0	0
12	1	1	72	25.0135	1	130	0	0	1	88	120	72	12.7	133	6.07	4.78	44.8	1.55	123	1	1	1	1	0	2	0	1	0	0	0	0	0	0	1	1	1	0	0	48	39	38	46	20	0	1	0	1	0	0
9	0	1	84	21.63	1	112	1	0	1	90	140	53	8.22	201	2.418	7.2	47	2.39	59	1	1	1	0	1	2	0	1	0	0	0	1	1	0	1	1	0	0	0	57	40	35	46	33	0	0	1	1	0	0
5	1	1	44	25.97	1	119	1	0	1	70	120	80	9.83	220	0.001	5.55	90	1.05	94	1	1	1	1	0	1	1	1	1	0	0	0	0	0	1	1	0	0	1	58	33	29	47	28	0	1	0	0	0	0
12	1	1	63	21.6128	1	138	1	0	0	63	142	95	11.79	155	0.36	3.36	19.4	5.79	73	1	1	1	1	0	1	0	0	0	0	0	0	0	0	1	1	0	0	1	39	40	35	55	19	0	1	0	0	1	0
6	0	1	59	24.7381	1	134	1	0	0	51	150	100	5.19	134	0.1486	4.48	25	1.9	111.5	1	1	1	1	0	1	0	0	0	0	0	0	0	0	2	1	1	1	0	40	45	39	61	33	1	0	0	1	0	1
5	0	1	49	28.93	0	145	1	0	1	55	150	84	14.47	354	0.08	5.44	46	2.25	66	1	1	1	0	1	1	1	0	0	0	0	0	0	0	0	0	0	0	0	71	33	31	53	30	0	0	1	0	0	1
8	1	1	50	23.94	1	144	1	0	0	66	127	81	12.46	239	8.22	6.36	58	2.72	81	1	1	1	1	0	1	0	0	0	0	0	0	0	0	1	0	0	0	0	45	34	33	52	30	0	1	0	0	0	0
9	1	1	82	18.9292	1	105	1	0	1	80	125	75	7.73	130	0.382	4.08	17.5	3.04	70	0	1	1	1	0	2	0	1	0	0	0	0	0	0	1	1	2	0	1	48	37	38	52	18	0	1	0	0	0	0
6	0	1	61	24.61	1	140	1	0	1	59	138	79	10.07	229	2.393	6.55	34	2.54	69	1	1	1	0	1	2	0	0	0	0	0	0	0	0	1	0	0	0	0	48	32	35	51	29	0	1	0	0	0	1
14	1	1	74	24.0207	1	122	1	0	1	78	151	88	6.78	177	0.1387	5.16	26	3.27	113	1	1	1	1	0	1	0	1	1	0	0	0	0	0	1	1	1	0	1	40	47	36	52	36	0	1	0	0	0	0
13	1	1	70	23.4952	0	126	0	0	1	93	131	89	11.2	187	7.65	5.75	41.6	4.42	60	1	1	1	1	0	2	0	0	0	0	0	0	0	0	1	0	1	0	1	45	26	35	44	19	0	1	0	0	0	0
19	1	1	67	23.4236	1	111	0	0	0	55	90	60	9.05	134	4.73	5.47	21.3	4.1	123	0	1	1	1	0	2	0	0	0	0	0	0	0	0	1	1	1	0	1	60	35	38	48	20	0	1	0	0	0	1
7	1	1	54	21.9713	1	137	1	0	1	86	126	80	11.38	208	0.141	4.46	42.5	2.39	58	1	1	1	1	0	1	0	0	0	0	0	0	0	0	0	0	1	0	1	47	34	35	50	21	0	1	0	0	0	0
20	1	1	53	27.9467	1	150	1	0	1	100	80	70	19.39	277	0.085	8.19	110	3.08	98	1	1	1	1	0	4	0	0	1	1	0	0	0	1	1	0	0	0	1	43	35	32	42	17	0	1	0	0	0	0
9	1	1	86	18.342	1	113	0	0	0	52	178	73	4.99	165	0.014	3	7.5	2.24	81	1	1	1	1	0	2	0	0	0	0	0	0	1	0	1	1	1	0	1	62	29	32	44	18	0	1	0	0	0	1
8	1	1	60	25.0762	1	131	1	0	1	83	160	95	7.29	217	0.663	5.17	26.5	2.95	80	1	1	1	1	0	2	0	1	0	0	0	0	0	0	1	0	0	0	1	51	35	35	49	19	0	1	0	0	0	0
15	1	1	57	22.3081	0	137	1	0	0	61	150	100	5.78	124	0.023	9.08	15.5	1.95	76	1	1	1	1	0	1	0	1	0	0	0	0	0	0	1	0	0	0	1	55	32	33	43	20	0	1	0	0	0	0
12	1	0	60	22.4559	0	96	0	0	0	50	120	65	10.44	136	1.466	7.32	24	1.44	66.8	1	1	1	1	0	1	0	0	0	0	0	0	0	0	1	0	0	1	0	55	27	30	46	26	1	0	0	0	0	1
7	0	0	76	24.0882	0	122	1	1	1	70	130	70	5.24	218	0.073	4.91	12.6	1.64	104	0	1	1	1	0	1	0	1	0	0	0	0	0	0	1	1	1	0	1	66	34	33	46	17	0	1	0	0	0	0
9	1	1	62	25.26	0	158	1	0	1	68	128	87	5.15	116	12.231	4.69	30	1.29	78	1	1	1	0	1	1	0	0	0	0	0	0	0	0	1	0	1	0	0	38	33	33	53	31	0	1	0	0	0	0
3	1	0	68	23.4236	0	121	1	0	1	70	134	92	9.04	190	1.75	5.56	20	4.37	67	0	1	1	1	0	2	0	0	0	0	0	0	0	0	1	0	1	0	1	53	36	38	44	22	0	1	1	0	0	0
9	1	1	72	23.4236	0	163	1	0	1	72	119	72	6.72	162	0.032	7.29	48.9	3.84	65	0	1	1	1	0	1	0	0	0	0	0	0	0	0	0	0	1	0	1	48	31	36	51	18	0	0	0	0	0	0
11	1	1	64	20.02	0	127	1	0	1	98	86	50	8.64	193	0.001	7.26	18	2.57	102	1	1	1	1	0	1	0	0	1	0	0	0	0	0	1	1	1	1	0	39	42	31	67	27	0	1	1	1	0	0
18	0	1	82	20.2812	0	113	1	0	1	97	134	72	8.62	164	0.367	7.14	12.4	1.61	88	0	1	1	1	0	1	0	1	0	0	0	0	0	0	1	1	1	0	1	45	42	40	65	20	0	0	0	1	0	0
8	1	1	60	23.838	1	129	0	0	1	68	130	80	9.24	216	2.056	5.79	57	2.48	84	1	1	1	1	0	1	0	0	0	0	0	0	0	0	1	0	0	0	1	58	33	28	43	27	0	1	0	0	0	0
19	0	0	64	26.67	0	110	1	1	1	81	126	74	7.94	310	0.001	4.87	31	1.17	121	0	1	1	1	0	1	1	1	1	0	0	0	0	0	1	0	1	0	0	42	41	31	54	31	1	1	1	0	0	0
10	1	0	76	19.765	0	119	1	1	1	75	144	84	7.98	131	10	3.9	41.6	2.77	101	1	1	1	1	0	1	0	1	0	0	0	0	0	0	1	0	1	0	1	39	41	35	56	19	0	1	0	0	0	0
4	0	0	79	21.76	0	141	0	1	1	57	110	83	5.61	144	0.001	7.92	16	0.56	83	1	1	1	1	0	3	1	1	1	0	0	0	0	0	1	0	0	0	0	54	33	30	49	29	0	1	1	0	0	1
10	0	0	70	23.5172	0	107	1	0	1	75	140	80	11.75	241	0.063	6.33	11.7	2.37	55	1	1	1	1	0	2	0	1	0	0	0	0	0	0	2	0	0	0	1	51	36	30	52	18	0	1	0	0	0	0
7	0	1	54	27.76	1	150	1	0	1	87	119	76	8.5	193	0.393	5.64	27	2.34	93	1	1	1	0	1	1	1	0	0	0	0	0	0	0	1	0	0	0	0	49	35	35	48	30	0	1	0	0	0	0
7	1	0	76	21.63	0	119	0	0	0	66	106	68	14.22	228	11.621	5.28	39	4.03	61	1	1	1	0	1	1	0	1	0	0	0	0	0	0	1	0	0	1	0	48	38	28	48	32	0	0	0	0	0	0
6	1	0	57	24.407	0	127	0	1	0	76	140	95	11.6	249	0.8271	9.59	40	3.45	70.9	1	1	1	1	0	1	0	1	0	0	0	0	0	0	1	1	1	0	1	60	34	34	43	34	0	1	1	0	0	0
8	0	0	70	21.6441	0	115	1	0	1	85	140	80	4.1	123	0.231	5.69	18.1	1.68	60	1	1	1	1	0	1	0	1	0	0	0	0	0	0	0	0	1	0	1	68	35	32	46	21	0	0	1	0	0	0
16	1	1	40	24.1896	0	127	1	0	1	76	122	73	5.01	183	1.768	8.4	32	1.6	49.4	1	1	1	1	0	1	0	0	0	0	0	0	0	0	0	0	1	0	0	60	33	33	44	33	0	1	0	0	0	0
16	1	0	64	17.6899	0	114	1	0	1	92	110	70	11.38	234	3.91	6.85	70.6	2.5	100	1	1	1	1	0	1	0	0	0	0	0	0	0	0	1	0	1	0	1	45	30	32	49	17	0	1	0	0	0	0
7	1	1	44	26.2282	1	151	1	0	1	100	190	140	14.45	209	6.949	7.39	118	4.32	77.3	1	1	1	0	0	3	0	1	0	0	0	0	0	0	2	0	0	1	1	44	46	36	56	36	0	1	1	0	0	0
10	1	1	59	23.4236	1	125	1	0	1	80	95	60	14.6	153	5.99	4.93	59.8	3.23	82	1	1	1	1	0	2	0	0	0	0	0	0	0	0	0	0	1	0	1	50	33	37	43	21	0	1	0	0	0	0
2	1	1	62	20.202	1	143	0	0	0	91	120	75	7.79	151	6.83	4.64	36.6	3.5	79	1	1	1	1	0	2	0	0	0	0	0	0	0	0	1	0	1	0	1	51	35	35	49	19	0	1	0	0	0	0
12	1	1	46	23.4236	1	157	1	0	1	128	150	90	15.33	202	5.9	4.91	93.8	2.72	81	1	1	1	1	0	1	0	1	0	0	0	0	0	0	1	0	0	0	1	45	34	36	45	17	0	1	0	0	0	0
7	1	1	81	22.8903	1	126	1	0	0	54	116	60	5.27	185	0.4928	4.23	52	3.95	92.7	0	1	1	0	0	1	0	0	0	0	0	0	0	0	1	1	1	1	0	60	38	35	46	32	0	1	1	0	0	1
9	0	1	50	21.97	0	148	1	0	0	67	91	49	12.29	262	1.932	5.55	11	3.74	61	0	1	1	0	1	2	0	0	0	0	0	0	0	0	2	0	0	1	1	59	38	34	58	30	0	0	1	0	0	0
8	1	1	53	22.99	1	123	1	1	0	85	145	94	10.41	332	1.712	7.44	13	1.25	143	1	1	1	0	1	1	1	1	1	0	0	0	0	0	1	0	0	0	0	54	33	30	49	29	0	0	0	1	0	0
16	1	1	63	23.4236	1	131	0	0	0	45	101	70	8.43	203	0.287	7.47	25.1	2.91	81	0	1	1	1	0	1	0	0	0	0	0	0	0	0	2	1	1	0	1	50	37	46	48	20	0	1	0	0	0	1
12	1	0	82	19.1111	0	117	1	0	0	110	140	90	11.29	251	0.604	22.22	15.3	3.79	77	0	1	1	1	0	3	0	0	0	0	0	0	0	0	1	0	1	0	1	59	35	35	46	18	0	0	1	1	0	0
9	1	1	55	23.9729	0	134	1	0	1	95	120	70	4.87	130	1.269	6.46	29	1.34	44.8	1	1	1	0	0	1	0	0	0	0	0	0	0	0	1	1	1	1	1	60	35	32	51	30	0	0	0	0	0	0
9	1	1	73	20.7612	1	130	1	0	1	85	140	80	13.29	189	0.361	4.08	48	2.94	73	1	1	1	1	0	1	0	0	0	0	0	0	0	0	0	0	2	1	1	45	31	35	42	18	0	1	0	0	0	0
5	0	1	75	18.59	1	133	0	0	0	52	129	70	6.88	165	4.661	4.78	18	1.9	72	1	1	1	1	0	2	0	1	0	0	0	0	1	0	1	0	1	0	0	53	27	30	47	25	0	0	0	0	0	1
20	0	1	69	21.48	1	127	1	0	0	63	114	68	8.43	243	0.201	5.19	23	4.4	99	1	1	1	1	0	2	0	0	0	0	0	0	0	0	2	1	1	1	0	48	34	23	55	27	1	1	1	0	0	0
7	1	1	61	23.6692	0	117	0	0	1	100	105	69	5.29	381	0.726	8.4	72	1.68	111.3	1	1	1	1	0	1	0	0	0	0	0	0	0	0	1	1	1	0	1	46	42	37	60	37	0	1	0	0	0	0
9	1	1	59	26.9531	1	145	1	0	1	104	127	92	8.28	215	0.57	4.06	21.2	3.44	61	1	1	1	1	0	2	0	0	0	0	0	0	0	0	0	0	0	0	1	52	31	30	50	20	0	1	0	0	0	0
16	1	1	59	27.9431	1	126	1	0	1	72	110	70	6.56	352	0.434	3.75	21.6	3.46	114	1	1	1	1	0	2	0	0	0	0	0	0	0	0	1	1	1	0	1	21	42	32	60	20	0	0	1	1	0	0
15	1	0	70	16.87	1	115	0	0	1	96	98	74	12.32	144	4.554	7.69	143	2.73	60	1	1	1	0	1	4	1	0	0	1	0	0	0	0	1	1	1	0	0	44	28	27	43	27	0	1	1	0	0	0
9	1	1	51	21.6128	0	151	1	0	1	79	144	96	17.05	133	2.41	4.57	33.9	1.77	65	0	1	1	1	0	1	0	1	0	0	0	0	0	0	1	0	1	0	1	57	29	36	50	18	0	1	0	0	0	0
9	1	1	63	23.47	0	115	1	0	1	60	110	75	6.76	114	0.2526	6.28	20	4.96	95.8	1	1	1	1	0	1	0	0	0	0	0	0	0	0	0	0	1	0	1	60	34	33	47	33	0	1	0	0	0	0
11	1	0	87	23.4236	0	117	1	0	1	75	110	60	7.87	112	4.84	4.98	15.9	2.65	81	0	1	1	1	0	2	0	1	0	0	0	0	0	0	1	1	2	0	1	45	37	40	50	25	0	1	0	0	0	0
7	1	1	78	23.4236	0	118	1	0	1	84	121	84	6.54	155	3.59	5.2	32.3	2.42	94	0	1	1	1	0	3	0	1	0	0	0	0	0	0	1	0	1	0	1	51	35	35	49	19	0	1	0	0	0	0
7	0	1	60	20.73	1	125	1	0	0	98	106	62	14.83	152	16	9.13	34	0.82	116	1	1	1	1	0	1	0	0	0	0	0	0	0	0	1	0	2	0	0	44	35	39	53	31	1	1	0	0	0	0
7	1	1	67	23.2434	1	141	1	1	0	57	155	90	6.19	172	0.436	4.07	35.4	3.15	60	1	1	1	1	0	2	0	0	0	0	0	0	0	0	0	1	0	0	1	70	36	37	42	20	0	1	0	0	0	1
11	1	1	60	24.3403	0	134	1	0	1	70	145	110	12.55	146	0.3131	8.62	41	3.02	89.4	1	1	1	1	0	1	0	1	0	0	0	0	0	0	0	0	1	0	0	59	29	30	50	28	0	1	0	0	0	0
14	1	0	79	25.7117	1	114	0	0	0	118	140	80	11.64	143	0.255	6.61	267.8	3.25	71	1	1	1	1	0	2	0	1	0	1	0	0	0	0	1	0	1	0	1	45	38	40	45	21	0	0	1	0	0	0
6	1	0	78	23.4236	1	86	1	0	1	62	95	60	11.26	183	1.89	3.38	15.3	1.56	72	0	1	1	1	0	2	0	1	0	0	0	0	0	0	0	0	3	0	1	41	39	38	44	16	0	1	0	0	0	0
15	1	1	57	24.8	1	156	1	0	1	80	165	84	13.36	223	16	11.58	43	2.65	79	1	1	1	1	0	2	1	0	0	0	0	0	0	0	1	1	0	0	0	54	38	34	50	30	0	1	0	0	0	0
9	1	1	59	23.489	0	126	1	1	1	78	128	76	10.9	191	0.07712	9.22	14	1.75	66.8	1	1	1	1	0	1	0	0	0	0	0	0	0	0	1	0	1	1	0	60	30	31	44	30	1	1	0	0	0	0
13	1	1	61	23.4375	1	115	1	0	1	100	132	75	10.17	209	0.273	4.27	65.1	2.36	67	1	1	1	1	0	2	0	0	0	0	0	0	0	0	1	0	1	0	1	28	40	32	50	19	0	1	0	0	0	0
12	1	1	55	23.4236	1	128	1	0	0	68	125	80	8.88	166	0.052	6.23	35.6	2.57	105	1	1	1	1	0	1	0	0	0	0	0	0	0	0	1	0	0	0	1	50	35	30	55	20	0	1	0	0	0	0
8	1	0	54	23.831	1	110	0	0	1	100	160	100	10.15	250	0.8656	12.62	38	3.19	83.8	1	1	0	1	0	1	1	0	0	0	0	0	0	0	1	0	0	0	0	25	28	27	47	25	0	1	0	0	0	0
5	1	1	52	28.08	0	146	1	0	1	60	108	74	4.18	206	0.495	11.31	19	2.67	84	0	1	1	1	0	1	1	0	0	0	0	0	0	0	1	0	0	0	1	58	29	27	54	26	0	1	0	0	0	0
4	0	1	71	21.1927	1	130	1	1	1	70	160	95	8.32	215	0.031	5.04	14.4	2.79	133	0	1	1	1	0	1	0	1	0	0	0	0	0	0	1	0	1	0	1	51	35	35	49	19	0	1	0	0	0	0
15	1	0	58	23.3951	0	136	1	1	1	76	105	62	24.71	672	2.274	6.72	61	2.13	83.5	0	1	1	1	0	2	0	1	0	0	0	0	0	0	1	0	1	0	1	37	38	26	51	26	0	1	0	0	0	0
9	1	0	42	24.39	0	129	0	0	0	80	130	80	4.76	145	0.001	4.38	20	2.26	82	1	1	1	1	0	1	0	0	0	0	0	0	0	0	1	0	1	1	0	43	30	29	53	30	0	0	0	1	0	0
16	0	0	87	22.27	0	118	0	0	1	73	135	77	7.59	128	5.859	6.67	22	1.58	114	0	1	1	1	0	2	0	1	0	0	0	0	0	0	1	1	0	1	1	69	32	30	37	32	0	1	1	0	0	0
13	1	1	64	24.977	1	145	1	0	1	86	130	80	11.69	148	2.79	3.03	39.4	3.55	63	1	1	1	1	0	1	0	0	0	0	0	0	0	0	1	0	1	0	1	44	34	38	53	16	0	0	1	0	0	0
17	1	1	76	23.1254	1	122	1	0	0	98	106	75	10	246	1.581	9.13	34	4.73	114.3	1	1	1	1	0	2	0	0	0	0	0	0	1	0	2	0	1	0	0	32	36	30	57	28	1	0	1	1	0	0
12	0	1	73	27.3438	1	132	1	0	0	60	142	85	7.89	347	0.318	6.86	28.5	2.77	53	0	1	1	1	0	2	0	1	0	0	0	0	0	0	1	1	1	0	1	51	35	35	49	19	0	0	0	1	0	0
9	1	1	51	24.456	1	140	1	1	1	21	145	95	6.33	208	4.208	8.4	161	3.99	78.1	1	1	1	1	0	1	0	1	0	0	0	0	0	0	0	0	0	0	0	48	30	28	44	24	1	1	0	0	0	1
28	1	1	74	21.3382	0	117	1	0	1	102	100	70	9.05	156	2.99	5.69	54.9	2.3	84	1	1	1	1	0	3	0	1	0	0	0	0	0	0	1	0	0	0	1	57	42	35	56	18	0	1	0	0	0	0
8	1	1	61	23.4699	0	122	1	0	1	59	120	70	8.71	190	2.242	6.34	24	2.46	101.7	1	1	1	1	0	1	0	0	0	0	0	0	0	0	1	0	1	0	0	58	33	32	44	27	1	1	0	0	0	1
8	1	1	50	21.05	1	171	1	1	1	66	138	90	9.28	150	13.949	4.48	46	1.86	94	1	1	1	1	0	1	0	1	0	0	0	0	0	0	0	1	0	0	0	47	32	28	52	31	0	1	0	0	0	0
11	1	1	73	23.4236	1	112	0	0	0	62	61	39	4.88	218	3.25	3.55	53.1	1.77	104	1	1	1	1	0	4	0	0	1	1	0	0	0	0	2	1	1	0	1	57	35	33	51	19	0	1	1	0	1	0
[truncated: 1,507 more rows]
[truncated: 16 more columns]
